# Supplementary material for: Divergent synthesis of difluoromethylated indole-3-carbinols, bisindolylmethanes and indole-3-methanamines
Source: Royal Society of Chemistry journal article supplement (doi:10.1039/d3ob01735d), 2023-11-24

*Supporting Information*

**Divergent Synthesis of Difluoromethylated Indole-3-  
carbinols and Bisindolymethanes**

Yifei Qu,<sup>§</sup> Xiaojia Cai,<sup>§</sup> Yuzhuang Guan,<sup>§</sup>Jiamin Tan, Zhangping Cai, Mingyun Liu,  
Yasi Huang, Jinhui Hu,\* Wen-Hua Chen \* and Jia-Qiang Wu \*

## Table of Contents

|                                                                                                 |    |
|-------------------------------------------------------------------------------------------------|----|
| General Information.....                                                                        | 1  |
| 1 Synthesis of difluoroacetaldehyde hemiethanol .....                                           | 2  |
| 2 General Procedure for Synthesis of Harmonic difluoro compound.....                            | 2  |
| 3 Optimization of the reaction conditions.....                                                  | 3  |
| 4 Characterization of Products.....                                                             | 4  |
| 4 Gram-scale Synthesis of product 3b and 4b .....                                               | 29 |
| 5 Derivatization of product 3b and Characterization Data of Compounds 9-13<br>and 4b.....       | 30 |
| 5.1 Compound 9.....                                                                             | 30 |
| 5.2 Compound 10.....                                                                            | 31 |
| 5.3 Compound 11 .....                                                                           | 31 |
| 5.4 Compound 4b.....                                                                            | 32 |
| 5.5 Compound 12.....                                                                            | 33 |
| 5.6 Compound 13.....                                                                            | 33 |
| 6 References.....                                                                               | 34 |
| 7 $^1\text{H}$ , $^{13}\text{C}$ and $^{19}\text{F}$ NMR Spectra of Synthesized Compounds ..... | 35 |

## General Information

The solvents were dried by distillation over the drying agents indicated in parentheses: THF and diethyl ether (Na-benzophenone). Trifluoroethanol, Anhydrous dichloromethane were purchased from Adamas-beta. Commercially available chemicals were obtained from commercial suppliers and used without further purification unless otherwise stated.

NMR-spectra were recorded on Bruker AvanceIII-500M in solvents as indicate. Chemical shifts ( $\delta$ ) are given in ppm relative to tetramethylsilane ( $\delta = 0$ ). The residual solvent signals were used as references and the chemical shifts converted to the TMS scale ( $\text{CDCl}_3$ :  $\delta_{\text{H}} = 7.26$  ppm,  $\delta_{\text{C}} = 77.16$  ppm;  $\text{CD}_3\text{OD}$ :  $\delta_{\text{H}} = 3.31$  ppm,  $\delta_{\text{C}} = 49.00$  ppm;  $(\text{CD}_3)_2\text{SO}$ :  $\delta_{\text{H}} = 2.49$  ppm,  $\delta_{\text{C}} = 39.52$  ppm). The following abbreviations were used to describe peak splitting patterns: s (singlet), d (doublet), t (triplet), q (quartet), m (multiplet), dd (doublet of doublets), td (triplet of doublets), ddd (doublet of doublet of doublets). Coupling constants ( $J$ ) were reported in hertz unit (Hz). High-resolution mass spectra (HRMS) were produced by Thermo Fisher Scientific. Analytical thin layer chromatography was performed on Polygram SIL G/UV<sub>254</sub> plates. Visualization was accomplished with short wave UV light, or  $\text{KMnO}_4$  staining solutions followed by heating. Flash column chromatography was performed using silica gel (200-300 mesh) with solvents distilled prior to use.

No attempts were made to optimize yields for substrate synthesis.

## 1 Synthesis of difluoroacetaldehyde hemiethanol

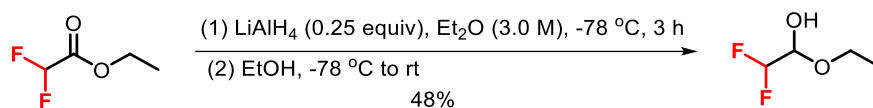

The title compound was prepared according to as known procedure.<sup>1</sup>

## 2 General Procedure for Synthesis of Harmonic difluoro compound

### General procedure A:

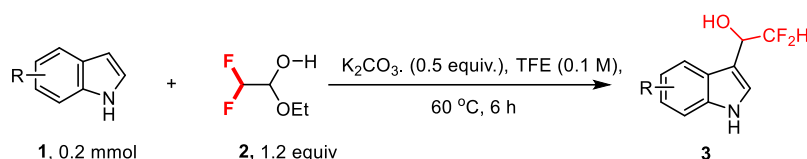

In an oven-dried pressure tube, a mixture of Indoles **1** (0.2 mmol, 1 equiv), difluoroacetaldehyde hemiethanol **2** (0.24 mmol, 1.2 equiv), K<sub>2</sub>CO<sub>3</sub> (0.5 equiv) in TFE (2mL) was stirred at 60°C for 8h. The reaction mixture was then diluted with Ethyl acetate (10 mL) and washed with brine. The aqueous phase was extracted with Ethyl acetate. The organic layers were combined, washed with brine and dried over Na<sub>2</sub>SO<sub>4</sub>. The solvent was removed in vacuo, and the residue was purified by column chromatography (PE/EA) to afford the desired product **3**.

### General procedure B:

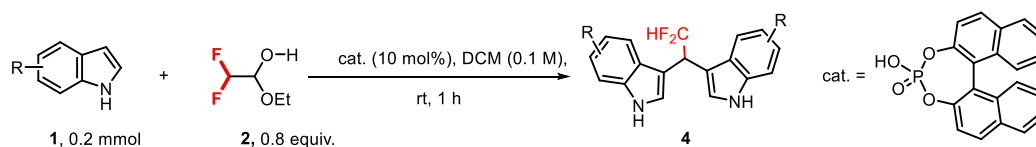

In an oven-dried pressure tube, a mixture of Indoles **1** (0.2 mmol, 1 equiv), difluoroacetaldehyde hemiethanol **2** (0.16 mmol, 0.8 equiv), 1,1'-Binaphthyl-2,2'-diyl hydrogenphosphate (10 mol%) in DCM (2mL) was stirred at room temperature for 8h. The reaction mixture was then diluted with Ethyl acetate (10 mL) and washed with brine. The aqueous phase was extracted with Ethyl acetate. The organic layers were combined, washed with brine and dried over Na<sub>2</sub>SO<sub>4</sub>. The solvent was removed in vacuo, and the residue was purified by column chromatography (PE/EA) to afford the desired product **4**.

### General procedure C:

In an oven-dried pressure tube, a mixture of anilines **5** (0.2 mmol, 1 equiv),

difluoroacetaldehyde hemiethanol **2** (0.16 mmol, 0.8 equiv), in PhMe (2mL) was stirred at 100 °C for 3h. Then the reaction mixture was cooled to 60 °C, followed indoles (0.2 mmol) was added. The reaction mixture was stirred for 24 h, then diluted with ethyl acetate (10 mL) and washed with brine. The aqueous phase was extracted with ethyl acetate. The organic layers were combined, washed with brine and dried over Na<sub>2</sub>SO<sub>4</sub>. The solvent was removed in vacuo, and the residue was purified by column chromatography (PE/EA) to afford the desired product **7**.

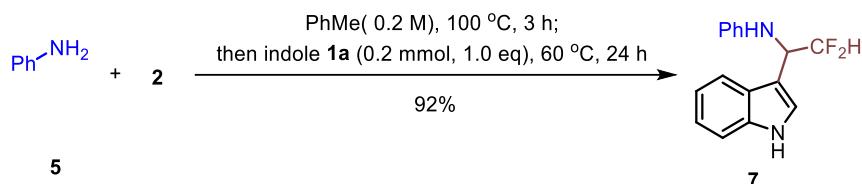

### 3 Optimization of the reaction conditions

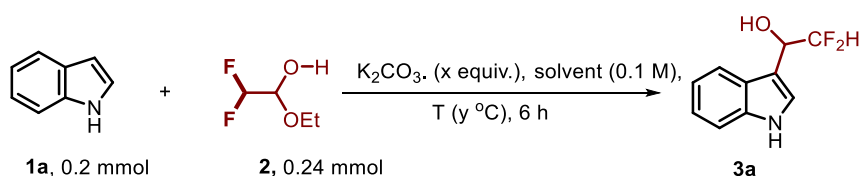

Table 1. Optimization of the solvent and temperature.

| Entry    | Solvent      | x / equiv. | y / °C | yield <sup>[a]</sup> |
|----------|--------------|------------|--------|----------------------|
| <b>1</b> | TFE (0.1 M)  | 0.5        | 60     | 93%                  |
| <b>2</b> | DCM (0.1 M)  | 0.5        | 60     | 82%                  |
| <b>3</b> | MeOH (0.1 M) | 0.5        | 60     | < 10%                |
| <b>4</b> | EtOH (0.1 M) | 0.5        | 60     | 43%                  |
| <b>5</b> | TFE (0.1 M)  | 0          | 60     | < 20%                |
| <b>6</b> | TFE (0.1 M)  | 1.0        | 60     | 88%                  |
| <b>7</b> | TFE (0.1 M)  | 0.5        | rt     | 40%                  |
| <b>8</b> | TFE (0.1 M)  | 0.5        | 90     | 76%                  |

<sup>[a]</sup> NMR yield by using 4-Iodoanisole as an internal standard.

Table 2. Optimization of the base

| Entry    | Base                             | x / equiv. | y / °C | yield <sup>[a]</sup> |
|----------|----------------------------------|------------|--------|----------------------|
| <b>1</b> | Na <sub>2</sub> CO <sub>3</sub>  | 0.5        | 60     | 90%                  |
| <b>2</b> | NaHCO <sub>3</sub>               | 0.5        | 60     | 88%                  |
| <b>3</b> | Na <sub>3</sub> PO <sub>4</sub>  | 0.5        | 60     | 88%                  |
| <b>4</b> | Na <sub>2</sub> HPO <sub>4</sub> | 0.5        | 60     | 91%                  |
| <b>5</b> | NaOH                             | 0.5        | 60     | 90%                  |
| <b>6</b> | KOH                              | 0.5        | 60     | 90%                  |
| <b>7</b> | LiOH                             | 0.5        | 60     | 86%                  |
| <b>8</b> | KOAc                             | 0.5        | 60     | 90%                  |
| <b>9</b> | K <sub>2</sub> CO <sub>3</sub>   | 0.5        | 60     | 93%                  |

<sup>[a]</sup> NMR yield by using 4-Iodoanisole as an internal standard.

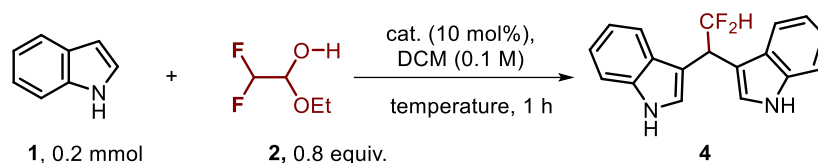

Table 1. Optimization of the solvent and temperature.

cat. = 1,1'-Binaphthyl-2,2'-diyl hydrogenphosphate

| Entry | Solvent          | temperature / °C | yield <sup>[a]</sup> |
|-------|------------------|------------------|----------------------|
| 1     | TFE (0.1 M)      | rt               | 51%                  |
| 2     | DCM (0.1 M)      | rt               | 92%                  |
| 3     | DCM (dry, 0.1 M) | rt               | 90%                  |
| 4     | EtOH (0.1 M)     | rt               | 33%                  |
| 5     | MeOH (0.1 M)     | rt               | 28%                  |
| 6     | DCM (0.1 M)      | 0                | 18%                  |
| 7     | DCE              | 0                | 15%                  |

<sup>[a]</sup> NMR yield by using 4-Iodoanisole as an internal standard.

Table 2. Optimization of the catalyst.

| Entry | catalyst                                    | equiv. | temperature / °C | yield <sup>[a]</sup> |
|-------|---------------------------------------------|--------|------------------|----------------------|
| 1     | 1,1'-Binaphthyl-2,2'-diyl hydrogenphosphate | 10%    | 60               | 95%                  |
| 2     | CuCl <sub>2</sub>                           | 10%    | 60               | 32%                  |
| 3     | InCl <sub>3</sub>                           | 10%    | 60               | 32%                  |
| 4     | InBr <sub>3</sub>                           | 10%    | 60               | 93%                  |
| 5     | RuCl <sub>3</sub>                           | 10%    | 60               | 88%                  |
| 6     | HCl                                         | 10%    | 60               | 28%                  |
| 7     | AcOH                                        | 10%    | 60               | 12%                  |

<sup>[a]</sup> NMR yield by using 4-Iodoanisole as an internal standard.

## 4 Characterization of Products

### 2,2-Difluoro-1-(1H-indol-3-yl)ethan-1-ol (3a)

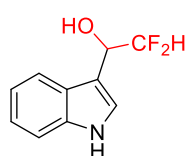

Following general procedure A the title compound was afforded as a brown oil (35.5 mg, 90%). TLC (PE: EA, 2:1 v/v):  $R_f$  = 0.5; <sup>1</sup>H NMR (500 MHz, Chloroform-*d*)  $\delta$  8.30 (s, 1H), 7.72 (d,  $J$  = 7.9 Hz, 1H), 7.38 (d,  $J$  = 8.2 Hz, 1H), 7.25 (s, 1H), 7.24 (t,  $J$  = 7.5 Hz, 1H), 7.17 (t,  $J$  = 7.5 Hz, 1H), 6.00 (td,  $J$  = 56.0, 4.3 Hz, 1H), 5.17- 5.11 (m, 1H), 2.45 (d,  $J$  = 4.2 Hz, 1H). <sup>13</sup>C NMR (125 MHz, Chloroform-*d*)  $\delta$  137.2, 128.0, 125.5, 122.5, 120.1, 119.5, 115.8 (t,  $J$  = 245.0 Hz), 109.8, 68.3 (t,  $J$  = 25.4 Hz), 33.0. <sup>19</sup>F NMR (470 MHz,

Chloroform-*d*)  $\delta$  -125.10 (ddd,  $J = 282.3, 55.8, 10.0$  Hz), -127.32 (ddd,  $J = 281.6, 56.4, 11.6$  Hz). **HRMS (ESI)**: calcd for  $C_{10}H_8F_2NO$  [ $M - H$ ]: 196.0568, found: 196.0559.

### 2,2-Difluoro-1-(1-methyl-1H-indol-3-yl)ethan-1-ol (3b)

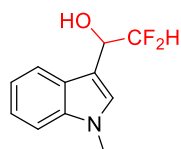

Following general procedure A to afford the title compound as a yellow oil (37.6 mg, 89%). TLC (PE: EA, 4:1 *v/v*):  $R_f = 0.3$ ;  $^1H$  NMR (500 MHz, Chloroform-*d*)  $\delta$  7.71 (d,  $J = 8.0$  Hz, 1H), 7.34 (d,  $J = 8.2$  Hz, 1H), 7.27 (td,  $J = 7.5, 1.0$  Hz, 1H), 7.16 (td,  $J = 7.4, 1.0$  Hz, 1H), 7.16 (s, 1H), 5.98 (td,  $J = 56.1, 4.5$  Hz, 1H), 5.15-5.10 (m, 1H), 3.78 (s, 3H), 2.34 (s, 1H).  $^{13}C$  NMR (125 MHz, Chloroform-*d*)  $\delta$  137.0, 127.9, 125.4, 122.3, 119.9, 119.4, 115.7 (t,  $J = 244.7$  Hz), 109.6, 109.6 (t,  $J = 3.4$  Hz), 68.1 (t,  $J = 25.2$  Hz), 32.9.  $^{19}F$  NMR (470 MHz, Chloroform-*d*)  $\delta$  -125.17 (ddd,  $J = 282.5, 56.7, 10.0$  Hz), -127.21 (ddd,  $J = 282.5, 57.4, 12.1$  Hz). **HRMS (ESI)**: calcd for  $C_{11}H_{12}F_2NO$  [ $M + H$ ] $^+$ : 212.0881, found: 212.0878.

### 2,2-difluoro-1-(1-phenyl-1H-indol-3-yl)ethan-1-ol (3c)

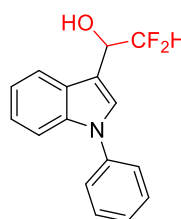

Following general procedure A to afford the title compound as a yellow oil (47.0 mg, 86%). TLC (PE: EA, 8:1 *v/v*):  $R_f = 0.35$ ;  $^1H$  NMR (600 MHz,  $CDCl_3$ )  $\delta$  7.80 (d,  $J = 7.8$  Hz, 1H), 7.56 (d,  $J = 8.2$  Hz, 1H), 7.54 (t,  $J = 7.8$  Hz, 2H), 7.50 (d,  $J = 6.9$  Hz, 2H), 7.46 (s, 1H), 7.40 (t,  $J = 7.3$  Hz, 1H), 7.28 (t,  $J = 7.55$  Hz, 1H), 7.24 (t,  $J = 7.5$  Hz, 1H), 6.06 (td,  $J = 56.1, 4.4$  Hz, 1H), 5.22 (td,  $J = 10.8, 4.4$  Hz, 1H), 2.47 (s, 1H).  $^{13}C$  NMR (151 MHz,  $CDCl_3$ )  $\delta$  139.3, 136.5, 129.8, 127.3, 127.1, 124.6, 123.3, 121.0, 119.8, 115.8 (t,  $J = 245.2$  Hz), 112.3 (t,  $J = 3.8$  Hz), 111.04, 68.31 (t,  $J = 25.1$  Hz).  $^{19}F$  NMR (377 MHz,  $CDCl_3$ )  $\delta$  -126.03 (d,  $J = 281.6$  Hz), -127.09 (d,  $J = 281.6$  Hz). **HRMS (ESI)** calculated for  $C_{22}H_{17}F_2N_2$  [ $M-H$ ] $^-$ : 347.1354, found 347.1321

### 2,2-difluoro-1-(1-(4-methoxybenzyl)-1H-indol-3-yl)ethan-1-ol (3d)

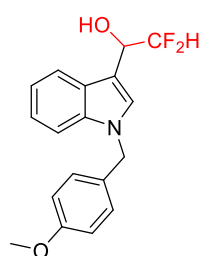

Following general procedure A to afford the title compound as a yellow oil (47.0 mg, 74%). TLC (PE: EA, 8:1 *v/v*):  $R_f = 0.2$ ;  $^1H$  NMR (600 MHz,  $CDCl_3$ )  $\delta$  7.74 (d,  $J = 8.0$  Hz, 1H), 7.33 (d,  $J = 8.2$  Hz, 1H), 7.23 (t,  $J = 7.6$  Hz, 1H), 7.20 (s, 1H), 7.17 (t,  $J = 7.4$  Hz, 1H), 7.09 (d,  $J = 8.7$  Hz, 2H), 6.85 (d,  $J = 8.7$  Hz, 2H), 6.00 (td,  $J =$

56.2, 4.5 Hz, 1H), 5.22 (s, 2H), 5.13 (td,  $J = 11.8, 9.7, 4.4$  Hz, 1H), 3.78 (s, 3H), 2.18 (br, 1H).  $^{13}\text{C}$  NMR (151 MHz,  $\text{CDCl}_3$ )  $\delta$  159.4, 136.8, 128.9, 128.5, 127.2, 126.8, 122.6, 120.2, 119.7, 115.8 (t,  $J = 245.2$  Hz), 114.4, 110.4 (t,  $J = 3.8$  Hz), 110.3, 68.4 (t,  $J = 25.6$  Hz), 55.4, 49.8.  $^{19}\text{F}$  NMR (377 MHz,  $\text{CDCl}_3$ )  $\delta$  -125.96 (d,  $J = 285.8$  Hz), -127.18 (d,  $J = 281.6$  Hz).

### 2,2-Difluoro-1-(2-methyl-1H-indol-3-yl)ethan-1-ol (3e)

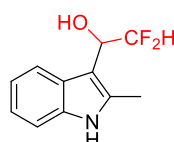

Following general procedure A to afford the title compound as a brown oil (32.9 mg, 78%). TLC (PE: EA, 2:1 v/v):  $R_f = 0.6$ ;  $^1\text{H}$  NMR (500 MHz, Chloroform-*d*)  $\delta$  7.95 (s, 1H), 7.69 (d,  $J = 7.8$  Hz, 1H), 7.28 (d,  $J = 7.9$  Hz, 1H), 7.15 (td,  $J = 7.5, 1.1$  Hz, 1H), 7.11 (td,  $J = 7.6, 1.1$  Hz, 1H), 6.05 (td,  $J = 56.5, 5.8$  Hz, 1H), 5.09-5.03 (m, 1H), 2.43 (s, 3H), 2.32 (s, 1H).  $^{13}\text{C}$  NMR (125 MHz, Chloroform-*d*)  $\delta$  135.3, 134.3, 125.7, 121.8, 120.2, 119.1, 115.5 (t,  $J = 244.5$  Hz), 110.6, 106.6z (t,  $J = 3.6$  Hz), 68.8 (t,  $J = 26.5$  Hz), 12.1.  $^{19}\text{F}$  NMR (470 MHz, Chloroform-*d*)  $\delta$  -125.72 (d,  $J = 10.1$  Hz), -125.84 (d,  $J = 10.2$  Hz). **HRMS (ESI):** calcd for  $\text{C}_{11}\text{H}_{10}\text{F}_2\text{NO}$  [ $\text{M} - \text{H}$ ] $^-$ : 210.0724, found: 210.0720.

### 2,2-Difluoro-1-(2-phenyl-1H-indol-3-yl)ethan-1-ol (3f)

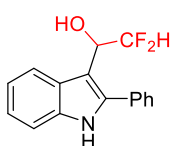

Following general procedure A to afford the title compound as a yellow oil (53.5 mg, 98%). TLC (PE: EA, 4:1 v/v):  $R_f = 0.3$ ;  $^1\text{H}$  NMR (500 MHz, Chloroform-*d*)  $\delta$  8.24 (s, 1H), 7.82 (d,  $J = 7.9$  Hz, 1H), 7.51 (d,  $J = 6.7$  Hz, 2H), 7.47 - 7.40 (m, 3H), 7.34 (d,  $J = 8.1$  Hz, 1H), 7.22 (t,  $J = 7.6$  Hz, 1H), 7.15 (t,  $J = 7.5$  Hz, 1H), 6.21 (td,  $J = 56.5, 5.7$  Hz, 1H), 5.13-5.08 (m, 1H), 2.35 (s, 1H).  $^{13}\text{C}$  NMR (125 MHz, Chloroform-*d*)  $\delta$  138.4, 136.0, 131.7, 129.1, 129.1, 128.9, 125.6, 123.0, 120.8, 120.5, 115.6 (t,  $J = 244.5$  Hz), 111.4, 107.7 (d,  $J = 6.6$  Hz), 68.7 (t,  $J = 26.6$  Hz).  $^{19}\text{F}$  NMR (470 MHz, Chloroform-*d*)  $\delta$  -123.67 (ddd,  $J = 283.1, 55.8, 8.7$  Hz), -124.95 (ddd,  $J = 283.1, 57.1, 10.5$  Hz). **HRMS (ESI):** calcd for  $\text{C}_{16}\text{H}_{12}\text{F}_2\text{NO}$  [ $\text{M} - \text{H}$ ] $^-$ : 272.0881, found: 272.0883.

### 3-(2,2-Difluoro-1-hydroxyethyl)-1H-indole-5-carbonitrile (3g)

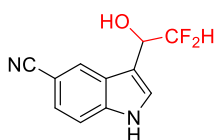

Following general procedure A to afford the title compound as a yellow oil (35.9 mg, 81%). TLC (PE: EA, 2:1 v/v):  $R_f = 0.2$ ;  $^1\text{H}$  NMR (500 MHz, Chloroform-*d*)  $\delta$  8.66 (s, 1H), 8.12 (s, 1H), 7.45-7.43 (m, 3H), 6.95 (td,  $J = 56.0, 4.4$  Hz, 1H), 5.19 - 5.13 (m, 1H), 2.59 (d,  $J = 4.0$  Hz, 1H).  $^{13}\text{C}$  NMR (125 MHz, Chloroform-*d*)  $\delta$  138.1, 125.0, 125.8, 125.8, 125.5, 120.5, 115.6 (t,  $J = 245.5$  Hz), 112.5, 112.4 (t,  $J = 3.7$  Hz), 103.7, 68.3 (t,  $J = 25.9$  Hz).  $^{19}\text{F}$



NMR (470 MHz, Chloroform-*d*)  $\delta$  -125.42 (ddd,  $J = 285.2, 56.7, 10.8$  Hz), -127.18 (ddd,  $J = 284.0, 55.6, 9.9$  Hz). **HRMS (ESI):** calcd for C<sub>11</sub>H<sub>7</sub>F<sub>2</sub>N<sub>2</sub>O [M - H]<sup>-</sup>: 221.0520, found: 221.0520.

### 3-(2,2-Difluoro-1-hydroxyethyl)-1H-indole-5-carbaldehyde (3h)

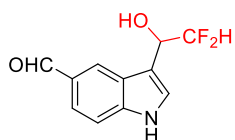

Following general procedure A to afford the title compound as a white solid (44.1 mg, 98%). TLC (PE: EA, 2:1 v/v):  $R_f = 0.2$ ; <sup>1</sup>H NMR (500 MHz, DMSO-*d*<sub>6</sub>)  $\delta$  11.65 (s, 1H), 9.99 (s, 1H), 8.32 (s, 1H), 7.66 (dd,  $J = 8.5, 1.4$  Hz, 1H), 7.55 (dd,  $J = 5.4, 3.0$  Hz, 2H), 6.18 (td,  $J = 56.5, 4.5$  Hz, 1H), 6.09 (s, 1H), 5.10 (t,  $J = 9.9$  Hz, 1H). <sup>13</sup>C NMR (125 MHz, DMSO-*d*<sub>6</sub>)  $\delta$  192.7, 139.8, 128.8, 125.5, 125.0, 125.5, 121.2, 116.4 (t,  $J = 243.6$  Hz), 113.8 (t,  $J = 7.1$  Hz), 112.4, 66.6 (t,  $J = 24.7$  Hz). <sup>19</sup>F NMR (470 MHz, DMSO-*d*<sub>6</sub>)  $\delta$  -125.13 (ddd,  $J = 276.5, 56.3, 12.2$  Hz), -125.10 (ddd,  $J = 276.2, 55.7, 11.4$  Hz). **HRMS (ESI):** calcd for C<sub>11</sub>H<sub>8</sub>F<sub>2</sub>NO<sub>2</sub> [M - H]<sup>-</sup>: 224.0517, found: 224.0521.

### 1-(3-(2,2-Difluoro-1-hydroxyethyl)-1H-indol-5-yl)ethan-1-one (3i)

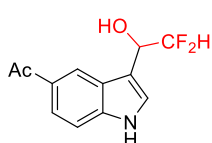

Following general procedure A to afford the title compound as a yellow oil (42.1 mg, 88%). TLC (PE: EA, 1:1 v/v):  $R_f = 0.4$ ; <sup>1</sup>H NMR (500 MHz, DMSO-*d*<sub>6</sub>)  $\delta$  11.51 (s, 1H), 8.40 (s, 1H), 7.76 (dd,  $J = 8.6, 1.6$  Hz, 1H), 7.50 (d,  $J = 2.4$  Hz, 1H), 7.47 (d,  $J = 8.6$  Hz, 1H), 6.18 (td,  $J = 55.9, 4.3$  Hz, 1H), 6.04 (d,  $J = 5.2$  Hz, 1H), 5.13- 5.07 (m, 1H), 2.61 (s, 3H). <sup>13</sup>C NMR (125 MHz, DMSO-*d*<sub>6</sub>)  $\delta$  197.6, 138.9, 128.8, 125.1, 125.7, 122.0, 121.4, 116.4 (t,  $J = 243.7$  Hz), 113.6 (t,  $J = 3.5$  Hz), 111.5, 66.5 (t,  $J = 24.6$  Hz), 26.7. <sup>19</sup>F NMR (470 MHz, DMSO-*d*<sub>6</sub>)  $\delta$  -125.20 (ddd,  $J = 276.7, 56.6, 12.8$  Hz), -125.32 (ddd,  $J = 275.1, 55.6, 11.3$  Hz). **HRMS (ESI):** calcd for C<sub>12</sub>H<sub>12</sub>F<sub>2</sub>NO<sub>2</sub> [M + H]<sup>+</sup>: 240.0830, found: 240.0829.

### 1-(5-chloro-1H-indol-3-yl)-2,2-Difluoroethan-1-ol (3j)

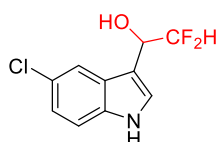

Following general procedure A to afford the title compound as a yellow oil (45.3 mg, 98%). TLC (PE: EA, 2:1 v/v):  $R_f = 0.5$ ; <sup>1</sup>H NMR (500 MHz, Chloroform-*d*)  $\delta$  8.34 (s, 1H), 7.67 (d,  $J = 1.6$  Hz, 1H), 7.24 (d,  $J = 8.2$  Hz, 1H), 7.22 (d,  $J = 2.6$  Hz, 1H), 7.15 (dd,  $J = 8.7, 2.0$  Hz, 1H), 5.93 (td,  $J = 56.0, 4.2$  Hz, 1H), 5.07 - 5.01 (m, 1H), 2.62 (d,  $J = 3.6$  Hz, 1H). <sup>13</sup>C NMR (125 MHz, Chloroform-*d*)  $\delta$  134.6, 125.9, 125.1, 124.7,

123.1, 118.9, 115.5 (t,  $J = 245.0$  Hz), 112.5, 110.9 (t,  $J = 3.6$  Hz), 68.1 (t,  $J = 25.4$  Hz).  $^{19}\text{F}$  NMR (470 MHz, Chloroform-*d*)  $\delta$  -125.23 (ddd,  $J = 282.6, 55.8, 10.0$  Hz), -127.20 (ddd,  $J = 282.5, 56.8, 11.8$  Hz). **HRMS (ESI):** calcd for  $\text{C}_{10}\text{H}_7\text{ClF}_2\text{NO}$  [ $\text{M} - \text{H}$ ] $^-$ : 230.0178, found: 230.0179.

### 2,2-Difluoro-1-(5-methoxy-1H-indol-3-yl)ethan-1-ol (3k)

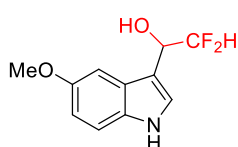

Following general procedure A to afford the title compound as a white solid (39.5 mg, 87%). TLC (PE: EA, 2:1 v/v):  $R_f = 0.4$ ;  $^1\text{H}$  NMR (500 MHz, Chloroform-*d*)  $\delta$  8.17 (s, 1H), 7.29 (d,  $J = 8.9$  Hz, 2H), 7.17 (d,  $J = 2.3$  Hz, 1H), 6.90 (dd,  $J = 8.8, 2.4$  Hz, 1H), 6.03 (td,  $J = 56.3, 3.9$  Hz, 1H), 5.13 (td,  $J = 11.6, 4.3$  Hz, 1H), 3.86 (s, 3H), 2.31 (s, 1H).  $^{13}\text{C}$  NMR (125 MHz, Chloroform-*d*)  $\delta$  154.7, 131.4, 125.5, 124.0, 115.8 (t,  $J = 245.1$  Hz), 113.4, 112.3, 111.3 – 111.3 (m), 101.1, 68.5 (t,  $J = 25.8$  Hz), 56.0.  $^{19}\text{F}$  NMR (470 MHz, Chloroform-*d*)  $\delta$  -125.55 – -127.80 (m). **HRMS (ESI):** calcd for  $\text{C}_{11}\text{H}_{10}\text{F}_2\text{NO}_2$  [ $\text{M} - \text{H}$ ] $^-$ : 226.0674, found: 226.0673.

### 2,2-Difluoro-1-(5-methyl-1H-indol-3-yl)ethan-1-ol (3l)

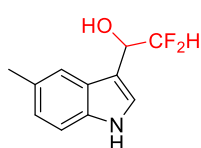

Following general procedure A to afford the title compound as a yellow solid (40.9 mg, 97%). TLC (PE: EA, 2:1 v/v):  $R_f = 0.5$ ;  $^1\text{H}$  NMR (500 MHz, Chloroform-*d*)  $\delta$  8.14 (s, 1H), 7.53 (s, 1H), 7.29 (d,  $J = 8.3$  Hz, 1H), 7.25 (s, 1H), 7.08 (d,  $J = 9.1$  Hz, 1H), 6.02 (td,  $J = 56.1, 4.3$  Hz, 1H), 5.16-5.10 (m, 1H), 2.47 (s, 3H), 2.28 (d,  $J = 4.3$  Hz, 1H).  $^{13}\text{C}$  NMR (125 MHz, Chloroform-*d*)  $\delta$  134.7, 129.9, 125.2, 124.6, 123.5, 119.1, 115.8 (t,  $J = 245.0$  Hz), 111.2, 111.1 (t,  $J = 3.7$  Hz), 68.5 (t,  $J = 25.4$  Hz), 21.6.  $^{19}\text{F}$  NMR (470 MHz, Chloroform-*d*)  $\delta$  -125.08 (ddd,  $J = 281.3, 55.7, 9.1$  Hz), -127.38 (ddd,  $J = 281.7, 55.6, 12.1$  Hz). **HRMS (ESI):** calcd for  $\text{C}_{11}\text{H}_{10}\text{F}_2\text{NO}$  [ $\text{M} - \text{H}$ ] $^-$ : 210.0724, found: 210.0725.

### 2,2-Difluoro-1-(6-(trifluoromethyl)-1H-indol-3-yl)ethan-1-ol (3m)

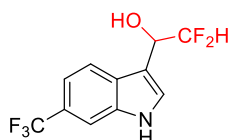

Following general procedure A to afford the title compound as a brown oil (37.1 mg, 70%). TLC (PE: EA, 2:1 v/v):  $R_f = 0.5$ ;  $^1\text{H}$  NMR (500 MHz, Chloroform-*d*)  $\delta$  8.54 (s, 1H), 7.83 (d,  $J = 8.4$  Hz, 1H), 7.68 (s, 1H), 7.44 (s, 1H), 7.41 (d,  $J = 8.4$  Hz, 1H), 5.98 (td,  $J = 56.1, 4.4$  Hz, 1H), 5.21-5.15 (m, 1H), 2.48 (d,  $J = 3.7$  Hz, 1H).  $^{13}\text{C}$  NMR (125 MHz, Chloroform-*d*)  $\delta$  135.1, 128.2, 125.9, 124.9 (q,  $J = 271.8$  Hz), 125.0 (q,  $J = 32.1$

Hz), 120.0, 117.1 (q,  $J = 3.6$  Hz), 115.6 (t,  $J = 245.5$  Hz), 111.7 (t,  $J = 3.6$  Hz), 109.1 (q,  $J = 4.5$  Hz), 68.2 (t,  $J = 25.6$  Hz).  $^{19}\text{F}$  NMR (470 MHz, Chloroform- $d$ )  $\delta$  -60.81, -125.77 (t,  $J = 10.3$  Hz), -125.89 (t,  $J = 9.9$  Hz). **HRMS (ESI):** calcd for  $\text{C}_{11}\text{H}_7\text{F}_5\text{NO}$  [ $\text{M} - \text{H}$ ]: 264.0442, found: 264.0443.

### 1-(6-chloro-1H-indol-3-yl)-2,2-Difluoroethan-1-ol (3n)

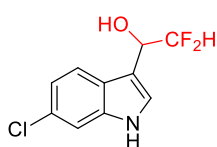

Following general procedure A to afford the title compound as a yellow solid (41.6 mg, 90%). TLC (PE: EA, 2:1 v/v):  $R_f = 0.5$ ;  $^1\text{H}$  NMR (500 MHz, Chloroform- $d$ )  $\delta$  8.25 (s, 1H), 7.64 (d,  $J = 8.5$  Hz, 1H), 7.37 (d,  $J = 1.7$  Hz, 1H), 7.28 (d,  $J = 2.5$  Hz, 1H), 7.14 (dd,  $J = 8.5, 1.7$  Hz, 1H), 5.96 (td,  $J = 56.1, 4.3$  Hz, 1H), 5.15-5.09 (m, 1H), 2.38 (d,  $J = 4.3$  Hz, 1H).  $^{13}\text{C}$  NMR (125 MHz, Chloroform- $d$ )  $\delta$  136.6, 128.8, 124.5, 123.9, 121.2, 120.4, 115.6 (t,  $J = 245.0$  Hz), 111.6 (t,  $J = 3.6$  Hz), 111.4, 68.2 (t,  $J = 25.0$  Hz).  $^{19}\text{F}$  NMR (470 MHz, Chloroform- $d$ )  $\delta$  -125.41 (ddd,  $J = 282.2, 56.9, 10.1$  Hz), -127.18 (ddd,  $J = 283.5, 56.4, 11.1$  Hz). **HRMS (ESI):** calcd for  $\text{C}_{10}\text{H}_7\text{ClF}_2\text{NO}$  [ $\text{M} - \text{H}$ ]: 230.0178, found: 230.0179.

### 1-(6-(benzyloxy)-1H-indol-3-yl)-2,2-Difluoroethan-1-ol (3o)

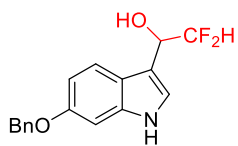

Following general procedure A to afford the title compound as a yellow solid (45.2 mg, 75%). TLC (PE: EA, 2:1 v/v):  $R_f = 0.4$ ;  $^1\text{H}$  NMR (500 MHz, Chloroform- $d$ )  $\delta$  8.11 (s, 1H), 7.57 (d,  $J = 8.7$  Hz, 1H), 7.43 (d,  $J = 7.2$  Hz, 2H), 7.37 (t,  $J = 7.4$  Hz, 2H), 7.32 (t,  $J = 7.2$  Hz, 1H), 7.07 (d,  $J = 2.4$  Hz, 1H), 6.90 (dd,  $J = 8.7, 2.2$  Hz, 1H), 6.85 (d,  $J = 2.1$  Hz, 1H), 5.94 (td,  $J = 56.1, 4.3$  Hz, 1H), 5.05 (s, 3H), 2.51 (s, 1H).  $^{13}\text{C}$  NMR (125 MHz, Chloroform- $d$ )  $\delta$  155.9, 137.2, 136.9, 128.6, 127.9, 127.5, 122.3, 120.3, 120.0, 115.6 (t,  $J = 245.1$  Hz), 111.2 (t,  $J = 3.6$  Hz), 111.1, 96.2, 70.6, 68.3 (t,  $J = 25.3$  Hz).  $^{19}\text{F}$  NMR (377 MHz, DMSO- $d_6$ )  $\delta$  -125.1 (d,  $J = 275.1$  Hz), 125.2 (d,  $J = 275.1$  Hz). **HRMS (ESI):** calcd for  $\text{C}_{17}\text{H}_{14}\text{F}_2\text{NO}_2$  [ $\text{M} - \text{H}$ ]: 302.0987, found: 302.0988.

### 2,2-Difluoro-1-(6-methoxy-1H-indol-3-yl)ethan-1-ol (3p)

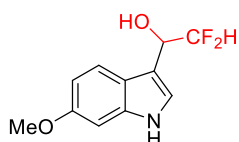

Following general procedure A to afford the title compound as a white solid (39.5 mg, 87%). TLC (PE: EA, 2:1 v/v):  $R_f = 0.4$ ;  $^1\text{H}$  NMR (500 MHz, Methanol- $d_4$ )  $\delta$  7.53 (d,  $J = 8.7$  Hz, 1H), 7.18 (s, 1H), 6.90 (d,  $J = 2.2$  Hz, 1H), 6.71 (dd,  $J = 8.7, 2.3$  Hz, 1H), 5.98 (td,  $J = 55.9, 4.5$  Hz, 1H), 5.01 (td,  $J = 9.1, 4.8$  Hz, 1H), 3.80 (s, 3H).  $^{13}\text{C}$  NMR (125 MHz, Methanol- $d_4$ )  $\delta$  157.8, 138.8, 123.6, 121.9, 120.8, 117.6 (t,  $J = 243.7$  Hz), 112.4-112.4 (m),

110.6, 95.4, 69.2-68.8 (m), 55.9.  $^{19}\text{F}$  NMR (470 MHz, Methanol- $d_4$ )  $\delta$  -125.94 (ddd,  $J = 279.3, 55.7, 9.1$  Hz), -128.30 (ddd,  $J = 280.4, 57.1, 13.1$  Hz). **HRMS (ESI)**: calcd for  $\text{C}_{11}\text{H}_{10}\text{F}_2\text{NO}_2$  [ $\text{M} - \text{H}$ ] $^-$ : 226.0674, found: 226.0672.

### 1-(7-chloro-1H-indol-3-yl)-2,2-Difluoroethan-1-ol (3q)

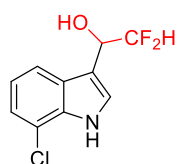

Following general procedure A to afford the title compound as a yellow oil (29.6 mg, 64%). TLC (PE: EA, 2:1 v/v):  $R_f = 0.7$ ;  $^1\text{H}$  NMR (500 MHz, Chloroform- $d$ )  $\delta$  8.50 (s, 1H), 7.63 (d,  $J = 8.0$  Hz, 1H), 7.33 (d,  $J = 2.5$  Hz, 1H), 7.25 (d,  $J = 2.0$  Hz, 1H), 7.10 (t,  $J = 7.8$  Hz, 1H), 5.97 (td,  $J = 56.1, 4.4$  Hz, 1H), 5.13 (td,  $J = 10.6, 4.3$  Hz, 1H), 2.51 (s, 1H).  $^{13}\text{C}$  NMR (125 MHz, Chloroform- $d$ )  $\delta$  133.6, 127.3, 123.9, 122.1, 121.2, 118.2, 116.9, 115.5 (t,  $J = 245.3$  Hz), 112.5 (t,  $J = 3.6$  Hz), 68.3 (t,  $J = 25.7$  Hz).  $^{19}\text{F}$  NMR (377 MHz, Chloroform- $d$ )  $\delta$  -126.7 (d,  $J = 283.2$  Hz), -126.8 (d,  $J = 283.2$  Hz).

**HRMS (ESI)**: calcd for  $\text{C}_{10}\text{H}_7\text{ClF}_2\text{NO}$  [ $\text{M} - \text{H}$ ] $^-$ : 230.0178, found: 230.0179.

### 2,2-Difluoro-1-(7-methyl-1H-indol-3-yl)ethan-1-ol (3r)

$^{19}\text{F}$  NMR (377 MHz, Chloroform- $d$ )  $\delta$  -126.07 (d,  $J = 281.7$  Hz), -127.37 (d,  $J = 281.7$  Hz).

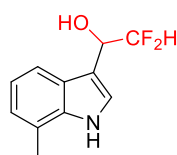

Following general procedure A to afford the title compound as a yellow oil (35.4 mg, 84%). TLC (PE: EA, 2:1 v/v):  $R_f = 0.4$ ;  $^1\text{H}$  NMR (500 MHz, Chloroform- $d$ )  $\delta$  8.17 (s, 1H), 7.57 (d,  $J = 7.8$  Hz, 1H), 7.26 (s, 1H), 7.09 (t,  $J = 7.5$  Hz, 1H), 7.05 (d,  $J = 6.9$  Hz, 1H), 5.98 (td,  $J = 55.6, 3.0$  Hz, 1H), 5.15-5.10 (m, 1H), 2.47 (s, 3H), 2.37 (d,  $J = 3.4$  Hz, 1H).  $^{13}\text{C}$  NMR (125 MHz, Chloroform- $d$ )  $\delta$  136.0, 125.5, 123.4, 123.1, 120.8, 120.7, 117.1, 115.8 (t,  $J = 244.7$  Hz), 112.0 (t,  $J = 3.7$  Hz), 68.5 (t,  $J = 25.4$  Hz), 16.7.  $^{19}\text{F}$  NMR (377 MHz, Chloroform- $d$ )  $\delta$  -126.0 (d,  $J = 281.7$  Hz), -127.4 (d,  $J = 281.7$  Hz).

**HRMS (ESI)**: calcd for  $\text{C}_{11}\text{H}_{10}\text{F}_2\text{NO}$  [ $\text{M} - \text{H}$ ] $^-$ : 210.0724, found: 210.0715.

### 1-(5,6-dichloro-1H-indol-3-yl)-2,2-difluoroethan-1-ol (3s)

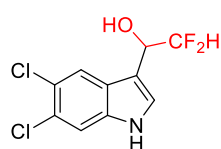

Following general procedure A to afford the title compound as a yellow oil (47.5 mg, 90%). TLC (PE: EA, 2:1 v/v):  $R_f = 0.4$ ;  $^1\text{H}$  NMR (500 MHz, Chloroform- $d$ )  $\delta$  8.42 (s, 1H), 7.78 (s, 1H), 7.43 (s, 1H), 7.26 (s, 1H), 5.93 (td,  $J = 56.1, 4.3$  Hz, 1H), 5.06 (td,  $J = 10.7, 4.2$  Hz, 1H), 2.76 (s, 1H).  $^{13}\text{C}$  NMR (125 MHz, Chloroform- $d$ )  $\delta$  134.9, 125.6, 125.5, 125.2, 124.4, 120.6, 115.4 (t,  $J = 245.3$  Hz), 112.9, 110.9 (t,  $J = 3.6$  Hz), 68.0 (t,  $J = 25.5$  Hz).  $^{19}\text{F}$  NMR (470 MHz, Chloroform- $d$ )  $\delta$  -125.39 (ddd,  $J = 282.8, 55.6,$

10.3 Hz), -127.27 (ddd,  $J = 282.2, 55.3, 10.2$  Hz). **HRMS (ESI)**: calcd for  $C_{10}H_6Cl_2F_2NO$  [ $M - H$ ] $^-$ : 263.9789, found: 263.9789.

### 1-(4-(diethylamino)phenyl)-2,2-Difluoroethan-1-ol (3t)

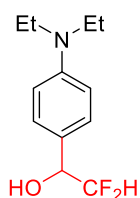

Following general procedure A to afford the title compound as a yellow oil (41.3 mg, 90%). TLC (PE: EA, 8:1  $v/v$ ):  $R_f = 0.3$ ;  $^1H$  NMR (500 MHz, Chloroform- $d$ )  $\delta$  7.24 (d,  $J = 8.7$  Hz, 2H), 6.68 (d,  $J = 8.8$  Hz, 2H), 5.76 (td,  $J = 56.2, 4.8$  Hz, 1H), 4.68 (td,  $J = 10.3, 4.8$  Hz, 1H), 3.36 (q,  $J = 7.1$  Hz, 4H), 2.33 (s, 1H), 1.17 (t,  $J = 7.1$  Hz, 6H).  $^{13}C$  NMR (125 MHz, Chloroform- $d$ )  $\delta$  148.4, 128.5, 122.3 (t,  $J = 3.2$  Hz), 116.2 (t,  $J = 244.5$  Hz), 111.6, 73.9 – 73.5 (m), 44.5, 12.6.  $^{19}F$  NMR (470 MHz, Chloroform- $d$ )  $\delta$  -126.88 (ddd,  $J = 281.8, 56.4, 9.6$  Hz), -127.65 (ddd,  $J = 281.8, 55.9, 10.6$  Hz). **HRMS (ESI)**: calcd for  $C_{12}H_{18}F_2NO$  [ $M + H$ ] $^+$ : 230.1350, found: 230.1347.

### 2,2-Difluoro-1-(4-(methylamino)phenyl)ethan-1-ol (3u)

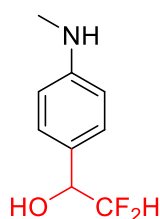

Following general procedure A to afford the title compound as a white solid (21 mg, 56%). TLC (PE: EA, 2:1  $v/v$ ):  $R_f = 0.3$ ;  $^1H$  NMR (500 MHz, Chloroform- $d$ )  $\delta$  7.21 (d,  $J = 8.5$  Hz, 2H), 6.61 (d,  $J = 8.6$  Hz, 2H), 5.73 (td,  $J = 56.2, 4.8$  Hz, 1H), 4.68 (td,  $J = 10.2, 4.8$  Hz, 1H), 2.83 (s, 3H).  $^{13}C$  NMR (125 MHz, Chloroform- $d$ )  $\delta$  150.0, 128.4, 124.4 (t,  $J = 3.3$  Hz), 116.2 (t,  $J = 244.3$  Hz), 112.5, 73.7 (t,  $J = 24.6$  Hz), 30.7.  $^{19}F$  NMR (470 MHz, Chloroform- $d$ )  $\delta$  -127.00 (ddd,  $J = 282.1, 56.3, 9.6$  Hz), -127.67 (ddd,  $J = 281.2, 55.3, 10.4$  Hz). **HRMS (ESI)**: calcd for  $C_9H_{12}F_2NO$  [ $M + H$ ] $^+$ : 188.0881, found: 188.0878.

### 4-(2,2-Difluoro-1-hydroxyethyl)-2,6-dimethylphenol (3v)

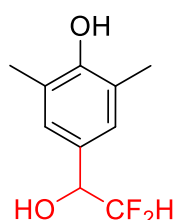

Following general procedure A to afford the title compound as a white solid (20.3 mg, 50%). TLC (PE: EA, 2:1  $v/v$ ):  $R_f = 0.5$ ;  $^1H$  NMR (500 MHz, Methanol- $d_4$ )  $\delta$  6.97 (s, 2H), 5.75 (td,  $J = 56.2, 4.7$  Hz, 1H), 4.58-4.52 (m, 1H), 2.21 (s, 6H).  $^{13}C$  NMR (125 MHz, Methanol- $d_4$ )  $\delta$  154.6, 129.5 (t,  $J = 3.2$  Hz), 128.5, 125.5, 117.8 (t,  $J = 243.8$  Hz), 74.2 (t,  $J = 24.3$  Hz), 16.7.  $^{19}F$  NMR (470 MHz, Methanol- $d_4$ )  $\delta$  -128.26 (ddd,  $J = 281.0, 55.6, 9.6$  Hz), -129.11 (ddd,  $J = 281.2, 55.5, 12.0$  Hz). **HRMS (ESI)**: calcd for  $C_{10}H_{11}F_2O_2$  [ $M - H$ ] $^-$ : 201.0721, found: 201.0721.

### 2-(2,2-Difluoro-1-hydroxyethyl)-4,6-dimethylphenol (3w)

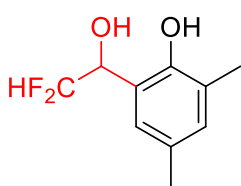

Following general procedure A to afford the title compound as a white solid (29 mg, 72%). TLC (PE: EA, 2:1 v/v):  $R_f = 0.8$ ;  $^1\text{H}$  NMR (500 MHz, DMSO- $d_6$ )  $\delta$  8.36 (s, 1H), 6.97 (s, 1H), 6.85 (s, 1H), 6.13 (d,  $J = 5.4$  Hz, 1H), 5.98 (td,  $J = 55.8, 3.6$  Hz, 1H), 5.11-5.04 (m, 1H), 2.17 (s, 3H), 2.13 (s, 3H).  $^{13}\text{C}$  NMR (125 MHz, DMSO- $d_6$ )  $\delta$  150.3, 130.8, 127.8, 126.1, 124.5, 124.3 (t,  $J = 3.3$  Hz), 116.1 (t,  $J = 243.3$  Hz), 67.4 (t,  $J = 22.9$  Hz), 20.3, 16.5.  $^{19}\text{F}$  NMR (470 MHz, DMSO- $d_6$ )  $\delta$  -125.43 (ddd,  $J = 275.4, 55.4, 8.2$  Hz), -129.51 (ddd,  $J = 275.6, 56.3, 16.9$  Hz). **HRMS (ESI):** calcd for  $\text{C}_{10}\text{H}_{11}\text{F}_2\text{O}_2$  [M - H] $^-$ : 201.0721, found: 201.0721.

### 5-(2,2-Difluoro-1-hydroxyethyl)pyrimidine-2,4(1H,3H)-dione (3x)

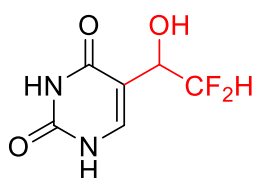

Following general procedure A to afford the title compound as a white solid (26.3 mg, 69%). TLC (PE: EA, 1:2 v/v):  $R_f = 0.3$ ;  $^1\text{H}$  NMR (500 MHz, Methanol- $d_4$ )  $\delta$  7.48 (s, 1H), 5.97 (td,  $J = 56.0, 3.3$  Hz, 1H), 4.76-4.70 (m, 1H).  $^{13}\text{C}$  NMR (125 MHz, Methanol- $d_4$ )  $\delta$  165.5, 153.1, 142.1, 116.2 (t,  $J = 243.4$  Hz), 110.0 (t,  $J = 3.6$  Hz), 67.6 (t,  $J = 24.3$  Hz).  $^{19}\text{F}$  NMR (470 MHz, Methanol- $d_4$ )  $\delta$  -129.88 (ddd,  $J = 281.2, 55.6, 7.7$  Hz), -133.04 (ddd,  $J = 281.3, 56.2, 15.5$  Hz). **HRMS (ESI):** calcd for  $\text{C}_6\text{H}_5\text{F}_2\text{N}_2\text{O}_3$  [M - H] $^-$ : 191.0262, found: 191.0260.

### 3,3'-(2,2-Difluoroethane-1,1-diyl)bis(1H-indole) (4a)

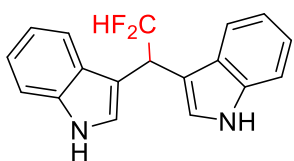

Following general procedure B to afford the title compound as a colourless oil (27.2 mg, 92%). TLC (PE: EA, 4:1 v/v):  $R_f = 0.7$ ;  $^1\text{H}$  NMR (500 MHz, Chloroform- $d$ )  $\delta$  8.25 (s, 2H), 7.58 (d,  $J = 8.0$  Hz, 2H), 7.36 (d,  $J = 8.1$  Hz, 2H), 7.20 - 7.07 (m, 6H), 6.37 (td,  $J = 56.6, 3.4$  Hz, 1H), 5.03 (td,  $J = 16.1, 3.4$  Hz, 1H).  $^{13}\text{C}$  NMR (125 MHz, Chloroform- $d$ )  $\delta$  136.3, 127.2, 123.5, 122.3, 119.8, 119.4, 117.3 (t,  $J = 245.0$  Hz), 111.9 (t,  $J = 3.7$  Hz), 111.4, 38.8 (t,  $J = 22.0$  Hz).  $^{19}\text{F}$  NMR (470 MHz, Chloroform- $d$ )  $\delta$  -117.69 (dd,  $J = 57.0, 15.8$  Hz). **HRMS (ESI):** calcd for  $\text{C}_{18}\text{H}_{13}\text{F}_2\text{N}_2$  [M - H] $^-$ : 295.1041, found: 295.1046.

### 3,3'-(2,2-Difluoroethane-1,1-diyl)bis(1-methyl-1H-indole) (4b)

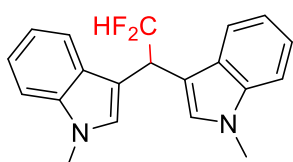

Following general procedure B to afford the title compound as a yellow solid (22.7 mg, 70%). TLC (PE: EA, 16:1 v/v):

$R_f = 0.3$ ;  $^1\text{H NMR}$  (500 MHz, Chloroform- $d$ )  $\delta$  7.64 (d,  $J = 8.0$  Hz, 2H), 7.34 (d,  $J = 8.2$  Hz, 2H), 7.29 – 7.25 (m, 2H), 7.15 – 7.11 (m, 2H), 7.06 (s, 2H), 6.38 (td,  $J = 56.7$ , 3.3 Hz, 1H), 5.06 (td,  $J = 16.4$ , 3.1 Hz, 1H), 3.76 (s, 6H).  $^{13}\text{C NMR}$  (125 MHz, Chloroform- $d$ )  $\delta$  137.1, 128.1, 127.7, 121.9, 119.5, 119.3, 117.4 (t,  $J = 247.5$  Hz), 110.4 (t,  $J = 3.7$  Hz), 109.5, 38.6 (t,  $J = 21.8$  Hz), 33.0.  $^{19}\text{F NMR}$  (470 MHz, Chloroform- $d$ )  $\delta$  -117.68 (dd,  $J = 56.8$ , 16.3 Hz). **HRMS (ESI)**: calcd for  $\text{C}_{20}\text{H}_{18}\text{F}_2\text{N}_2\text{Na}$   $[\text{M} + \text{Na}]^+$ :347.1330, found: 347.1321.

### 3,3'-(2,2-Difluoroethane-1,1-diyl)bis(2-methyl-1H-indole) (4c)

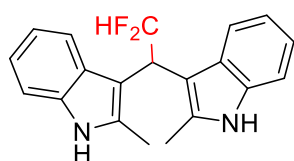

Following general procedure B to afford the title compound as a yellow oil (26.9 mg, 83%). TLC (PE: EA, 4:1  $v/v$ ):  $R_f = 0.4$ ;  $^1\text{H NMR}$  (500 MHz, DMSO- $d_6$ )  $\delta$  10.89 (s, 2H), 7.40 (d,  $J = 8.0$  Hz, 2H), 7.23 (d,  $J = 8.0$  Hz, 2H), 7.11 – 6.87 (m, 3H), 6.84 (t,  $J = 7.3$  Hz, 2H), 4.87 (td,  $J = 16.5$ , 5.8 Hz, 1H), 2.34 (s, 6H).  $^{13}\text{C NMR}$  (125 MHz, DMSO- $d_6$ )  $\delta$  135.0., 132.9., 127.6, 119.9, 118.5, 118.4, 117.4 (t,  $J = 240.5$  Hz), 110.5, 106.8 (t,  $J = 4.1$  Hz), 12.2.  $^{19}\text{F NMR}$  (470 MHz, DMSO- $d_6$ )  $\delta$  -114.58 (dd,  $J = 56.0$ , 16.8 Hz). **HRMS (ESI)**: calcd for  $\text{C}_{20}\text{H}_{17}\text{F}_2\text{N}_2$   $[\text{M} - \text{H}]^-$ :323.1354, found: 323.1360.

### 3,3'-(2,2-Difluoroethane-1,1-diyl)bis(2-phenyl-1H-indole) (4d)

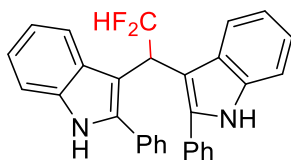

Following general procedure B to afford the title compound as a yellow oil (41.2 mg, 92%). TLC (PE: EA, 8:1  $v/v$ ):  $R_f = 0.5$ ;  $^1\text{H NMR}$  (500 MHz, Chloroform- $d$ )  $\delta$  7.99 (s, 2H), 7.61 (d,  $J = 8.1$  Hz, 2H), 7.30 – 6.77 (m, 16H), 5.26 (td,  $J = 15.3$ , 5.8 Hz, 1H).  $^{13}\text{C NMR}$  (125 MHz, Chloroform- $d$ )  $\delta$  136.9, 135.7, 133.0, 129.2, 128.6, 128.3, 127.8, 122.1, 121.0, 120.2, 117.1 (t,  $J = 243.3$  Hz), 110.9, 109.7 (t,  $J = 4.4$  Hz), 40.4 (t,  $J = 22.6$  Hz).  $^{19}\text{F NMR}$  (470 MHz, Chloroform- $d$ )  $\delta$  -113.77 (dd,  $J = 56.2$ , 15.3 Hz). **HRMS (ESI)**: calcd for  $\text{C}_{30}\text{H}_{21}\text{F}_2\text{N}_2$   $[\text{M} - \text{H}]^-$ :447.1667, found: 447.1669.

### (2,2-Difluoroethane-1,1-diyl)bis(1H-indole-3,4-diyl)diacetate (4e)

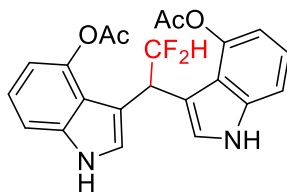

Following general procedure B to afford the title compound as a yellow solid (31.3 mg, 76%). TLC (PE: EA, 2:1  $v/v$ ):  $R_f = 0.5$ ;  $^1\text{H NMR}$  (500 MHz, Chloroform- $d$ )  $\delta$  8.30 (d,  $J = 2.0$  Hz, 2H), 7.09 – 7.00 (m, 4H), 6.79 (d,  $J = 7.5$  Hz, 2H), 6.45 (d,  $J = 1.9$  Hz, 2H), 6.30 (td,  $J = 56.5$ , 3.2 Hz, 1H), 5.33

(td,  $J = 15.0, 2.8$  Hz, 1H), 2.00 (s, 6H).  $^{13}\text{C}$  NMR (125 MHz, Chloroform- $d$ )  $\delta$  170.3, 143.7, 138.7, 124.8, 122.2, 119.2, 117.9 (t,  $J = 245.1$  Hz), 113.1, 110.1 (t,  $J = 3.7$  Hz), 109.6, 39.6 (t,  $J = 21.1$  Hz), 20.9.  $^{19}\text{F}$  NMR (470 MHz, Chloroform- $d$ )  $\delta$  -119.90 (dd,  $J = 56.4, 15.1$  Hz). **HRMS (ESI)**: calcd for  $\text{C}_{22}\text{H}_{17}\text{F}_2\text{N}_2\text{O}_4$   $[\text{M} - \text{H}]^-$ :411.1150, found: 411.1157.

### 3,3'-(2,2-Difluoroethane-1,1-diyl)bis(1H-indole-5-carbonitrile) (4f)

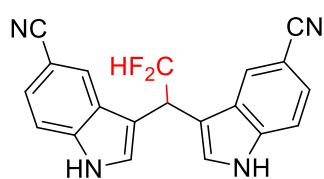

Following general procedure B to afford the title compound as a yellow solid (24 mg, 69%). TLC (PE: EA, 2:1 v/v):  $R_f = 0.4$ ;  $^1\text{H}$  NMR (500 MHz, DMSO- $d_6$ )  $\delta$  11.69 (d,  $J = 1.1$  Hz, 2H), 8.18 (s, 2H), 7.67 (d,  $J = 2.3$  Hz, 2H), 7.53 (d,  $J = 8.4$  Hz, 2H), 7.42 (dd,  $J = 8.4, 1.4$  Hz, 2H), 6.70 (td,  $J = 56.2, 4.5$  Hz, 1H), 5.25 (td,  $J = 15.5, 4.3$  Hz, 1H).  $^{13}\text{C}$  NMR (125 MHz, DMSO- $d_6$ )  $\delta$  137.9, 125.8, 125.6, 124.8, 123.9, 120.8, 117.2 (t,  $J = 242.7$  Hz), 113.0, 111.7 (t,  $J = 3.7$  Hz), 100.9, 37.3 (t,  $J = 22.5$  Hz).  $^{13}\text{C}$  NMR (101 MHz, DMSO- $d_6$ )  $\delta$  138.2, 127.2, 127.0, 125.2, 124.4, 121.2, 117.6 (t,  $J = 243.1$ Hz), 113.4, 112.1 (t,  $J = 3.7$  Hz), 101.2, 37.7 (t,  $J = 22.5$  Hz).

$^{19}\text{F}$  NMR (470 MHz, DMSO- $d_6$ )  $\delta$  -117.4 (dd,  $J = 56.1, 15.7$  Hz). **HRMS (ESI)**: calcd for  $\text{C}_{20}\text{H}_{11}\text{F}_2\text{N}_4$   $[\text{M} - \text{H}]^-$ :345.0946, found: 345.0954.

### 3,3'-(2,2-Difluoroethane-1,1-diyl)bis(5-chloro-1H-indole) (4g)

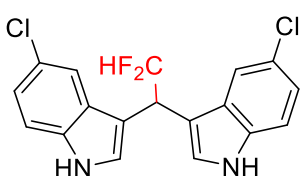

Following general procedure B to afford the title compound as a red brown oil (30.6 mg, 84%). TLC (PE: EA, 2:1 v/v):  $R_f = 0.5$ ;  $^1\text{H}$  NMR (500 MHz, Chloroform- $d$ )  $\delta$  8.16 (s, 2H), 7.49 (d,  $J = 1.5$  Hz, 2H), 7.26 (d,  $J = 8.6$  Hz, 2H), 7.16 – 7.12 (m, 4H), 6.32 (td,  $J = 56.4, 3.3$  Hz, 1H), 4.87 (td,  $J = 16.2, 3.2$  Hz, 1H).  $^{13}\text{C}$  NMR (125 MHz, Chloroform- $d$ )  $\delta$  134.7, 128.1, 125.7, 124.9, 122.9, 118.9, 116.9 (t,  $J = 245.2$  Hz), 112.5, 111.2 (t,  $J = 3.6$  Hz), 38.8 (t,  $J = 22.2$  Hz).  $^{19}\text{F}$  NMR (470 MHz, Chloroform- $d$ )  $\delta$  -117.64 (dd,  $J = 56.4, 16.2$  Hz). **HRMS (ESI)**: calcd for  $\text{C}_{18}\text{H}_{11}\text{Cl}_2\text{F}_2\text{N}_2$   $[\text{M} - \text{H}]^-$ :363.0261, found: 363.0269.

### 3,3'-(2,2-difluoroethane-1,1-diyl)bis(5-ethoxy-1H-indole) (4h)



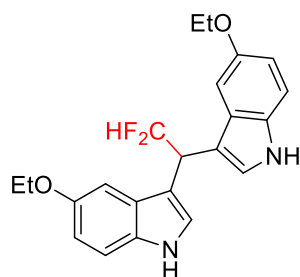

Following general procedure B to afford the title compound as a yellow oil (33 mg, 86%). TLC (PE: EA, 4:1 v/v):  $R_f$  = 0.5;  $^1\text{H NMR}$  (500 MHz, Chloroform-d)  $\delta$  8.00 (s, 2H), 7.22 (d,  $J$  = 8.8 Hz, 2H), 7.06 (dd,  $J$  = 9.8, 2.2 Hz, 4H), 6.88 (dd,  $J$  = 8.8, 2.4 Hz, 2H), 6.36 (td,  $J$  = 56.7, 3.4 Hz, 1H), 4.91 (td,  $J$  = 16.0, 3.4 Hz, 1H), 4.09 – 3.95 (m, 4H), 1.41 (t,  $J$  = 7.0 Hz, 6H).  $^{13}\text{C NMR}$  (125 MHz, Chloroform-d)  $\delta$  153.3, 131.4, 127.6, 124.1, 117.3 (t,  $J$  = 245.0 Hz), 112.8, 111.9, 111.4 (t,  $J$  = 3.7 Hz), 102.5, 64.3, 38.8 (t,  $J$  = 21.9 Hz), 15.0.  $^{19}\text{F NMR}$  (470 MHz, Chloroform-d)  $\delta$  -117.32 (dd,  $J$  = 56.9, 15.9 Hz). **HRMS (ESI)**: calcd for  $\text{C}_{22}\text{H}_{21}\text{F}_2\text{N}_2\text{O}_2$  [ $\text{M} - \text{H}$ ] $^-$ : 383.1565, found: 383.1569.

### 3,3'-(2,2-Difluoroethane-1,1-diyl)bis(5-methoxy-1H-indole) (4i)

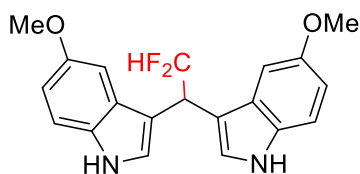

Following general procedure B to afford the title compound as a white solid (34.9 mg, 98%). TLC (PE: EA, 4:1 v/v):  $R_f$  = 0.4;  $^1\text{H NMR}$  (500 MHz, Chloroform-d)  $\delta$  8.00 (s, 2H), 7.23 (d,  $J$  = 8.8 Hz, 2H), 7.10 (d,  $J$  = 2.4 Hz, 2H), 7.02 (d,  $J$  = 2.3 Hz, 2H), 6.85 (dd,  $J$  = 8.8, 2.4 Hz, 2H), 6.35 (td,  $J$  = 56.6, 3.5 Hz, 1H), 4.91 (td,  $J$  = 16.1, 3.4 Hz, 1H), 3.78 (s, 6H).  $^{13}\text{C NMR}$  (125 MHz, Chloroform-d)  $\delta$  154.2, 131.5, 127.7, 124.3, 117.4 (t,  $J$  = 245.1 Hz), 112.3 (d,  $J$  = 39.9 Hz), 111.5 (t,  $J$  = 3.8 Hz), 101.4, 56.0, 38.9 (t,  $J$  = 22.0 Hz).  $^{19}\text{F NMR}$  (470 MHz, Chloroform-d)  $\delta$  -117.38 (dd,  $J$  = 56.5, 16.2 Hz). **HRMS (ESI)**: calcd for  $\text{C}_{20}\text{H}_{17}\text{F}_2\text{N}_2\text{O}_2$  [ $\text{M} - \text{H}$ ] $^-$ : 355.1252, found: 355.1258.

### 3,3'-(2,2-Difluoroethane-1,1-diyl)bis(5-methyl-1H-indole) (4j)

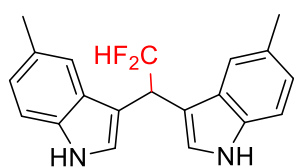

Following general procedure B to afford the title compound as a yellow solid (26.9 mg, 83%). TLC (PE: EA, 2:1 v/v):  $R_f$  = 0.6;  $^1\text{H NMR}$  (500 MHz, Chloroform-d)  $\delta$  7.91 (s, 2H), 7.46 (d,  $J$  = 7.9 Hz, 2H), 7.13 (s, 2H), 7.01 (s, 2H), 6.93 (d,  $J$  = 8.0 Hz, 2H), 6.35 (t,  $J$  = 56.7 Hz, 1H), 4.97 (t,  $J$  = 15.5 Hz, 1H), 2.45 (s, 6H).  $^{13}\text{C NMR}$  (125 MHz, Chloroform-d)  $\delta$  136.8, 132.2, 125.1, 122.8, 121.6, 119.1, 117.4 (t,  $J$  = 244.9 Hz), 111.8 (t,  $J$  = 3.8 Hz), 111.3, 38.9 (t,  $J$  = 22.1 Hz), 21.8.  $^{19}\text{F NMR}$  (470 MHz, Chloroform-d)  $\delta$  -119.90 (dd,  $J$  = 56.4, 15.1 Hz). **HRMS (ESI)**: calcd for  $\text{C}_{20}\text{H}_{17}\text{F}_2\text{N}_2$  [ $\text{M} - \text{H}$ ] $^-$ : 323.1354, found: 323.1360.

### 3,3'-(2,2-Difluoroethane-1,1-diyl)bis(6-(trifluoromethyl)-1H-indole)(4k)

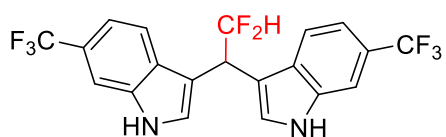

Following general procedure B to afford the title compound as a white solid (21.6 mg, 50%).

TLC (PE: EA, 4:1 v/v):  $R_f = 0.3$ ;  $^1\text{H NMR}$  (500 MHz, Chloroform- $d$ )  $\delta$  8.38 (s, 2H), 7.66 (s, 2H), 7.60 (d,  $J = 8.4$  Hz, 2H), 7.32 (d,  $J = 9.3$  Hz, 4H), 6.37 (td,  $J = 56.3, 3.2$  Hz, 1H), 5.04 (td,  $J = 16.0, 3.2$  Hz, 1H).  $^{13}\text{C NMR}$  (125 MHz, Chloroform- $d$ )  $\delta$  135.2, 129.3, 125.1, 125.2 (q,  $J = 271.6$  Hz), 124.8 (q,  $J = 32.3$  Hz), 119.8, 116.9 (t,  $J = 245.2$  Hz), 116.8 (q,  $J = 3.1$  Hz), 111.9 (t,  $J = 3.6$  Hz), 109.1 (q,  $J = 4.4$  Hz), 38.8 (t,  $J = 22.3$  Hz).  $^{19}\text{F NMR}$  (470 MHz, Chloroform- $d$ )  $\delta$  -60.69, -117.87 (dd,  $J = 56.6, 16.0$  Hz). **HRMS (ESI)**: calcd for  $\text{C}_{20}\text{H}_{11}\text{F}_8\text{N}_2$  [ $\text{M} - \text{H}$ ] $^-$ : 431.0789, found: 431.0792.

### 3,3'-(2,2-difluoroethane-1,1-diyl)bis(1H-indole-6-carbonitrile) (4l)

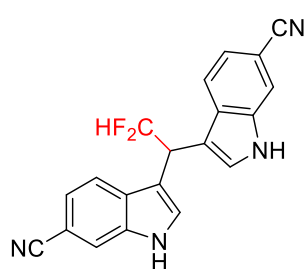

Following general procedure B to afford the title compound as a white solid (31.8 mg, 92%). TLC (PE: EA, 2:1 v/v):  $R_f = 0.4$ ;

$^1\text{H NMR}$  (500 MHz, DMSO- $d_6$ )  $\delta$  11.68 (s, 2H), 7.88 (s, 2H), 7.77 – 7.66 (m, 4H), 7.28 (dd,  $J = 8.3, 1.4$  Hz, 2H), 6.69 (td,  $J = 56.2, 4.2$  Hz, 1H), 5.20 (td,  $J = 15.7, 4.1$  Hz, 1H).  $^{13}\text{C NMR}$  (125 MHz, DMSO- $d_6$ )  $\delta$  135.3, 130.2, 129.0, 121.8, 121.0, 120.5, 117.7 (t,  $J = 242.4$  Hz), 117.0, 112.0, 103.0, 37.8 (t,  $J = 22.2$  Hz).  $^{19}\text{F NMR}$  (470 MHz, DMSO- $d_6$ )  $\delta$  -117.38 (dd,  $J = 56.1, 15.9$  Hz).

**HRMS (ESI)**: calcd for  $\text{C}_{20}\text{H}_{11}\text{F}_2\text{N}_4$  [ $\text{M} - \text{H}$ ] $^-$ : 345.0946, found: 345.0950.

### 3,3'-(2,2-Difluoroethane-1,1-diyl)bis(6-bromo-1H-indole) (4m)

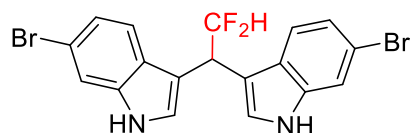

Following general procedure B to afford the title compound as a white solid (40.6 mg, 90%). TLC

(PE: EA, 4:1 v/v):  $R_f = 0.4$ ;  $^1\text{H NMR}$  (500 MHz, Chloroform- $d$ )  $\delta$  8.13 (s, 1H), 7.52 (d,  $J = 1.4$  Hz, 1H), 7.36 (d,  $J = 8.5$  Hz, 1H), 7.16 (dd,  $J = 8.5, 1.4$  Hz, 1H), 7.12 (d,  $J = 2.1$  Hz, 1H), 6.32 (td,  $J = 56.4, 3.3$  Hz, 1H), 4.93 (td,  $J = 15.9, 3.2$  Hz, 1H).  $^{13}\text{C NMR}$  (125 MHz, Chloroform- $d$ )  $\delta$  137.1, 125.0, 124.0, 123.3, 120.7, 117.0 (t,  $J = 245.5$  Hz), 116.1, 114.4, 111.9 (t,  $J = 3.6$  Hz), 38.8 (t,  $J = 22.5$  Hz).  $^{19}\text{F NMR}$  (470 MHz, Chloroform- $d$ )  $\delta$  -117.83 (dd,  $J = 56.2, 15.9$  Hz). **HRMS (ESI)**: calcd for  $\text{C}_{18}\text{H}_{11}\text{Br}_2\text{F}_2\text{N}_2$  [ $\text{M} - \text{H}$ ] $^-$ : 450.9251, found: 450.9255.

### 3,3'-(2,2-Difluoroethane-1,1-diyl)bis(6-chloro-1H-indole) (4n)

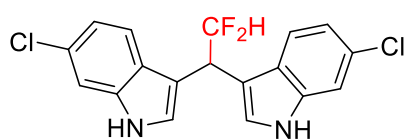

Following general procedure B to afford the title compound as a white solid (30.6 mg, 84%). TLC (PE: EA, 4:1 v/v):  $R_f = 0.5$ ;  $^1\text{H NMR}$  (500 MHz, Chloroform- $d$ )  $\delta$  8.10 (s, 2H), 7.41 (d,  $J = 8.5$  Hz, 2H), 7.33 (d,  $J = 1.6$  Hz, 2H), 7.10 (d,  $J = 2.1$  Hz, 2H), 7.04 (dd,  $J = 8.5, 1.8$  Hz, 2H), 6.32 (td,  $J = 56.5, 3.3$  Hz, 1H), 4.93 (td,  $J = 16.0, 3.2$  Hz, 1H).  $^{13}\text{C NMR}$  (125 MHz, Chloroform- $d$ )  $\delta$  136.7, 128.4, 125.7, 124.1, 120.7, 120.3, 117.0 (t,  $J = 245.2$  Hz), 111.8 (t,  $J = 3.7$  Hz), 111.4, 38.7 (t,  $J = 22.2$  Hz).  $^{13}\text{C NMR}$  (101 MHz, Chloroform- $d$ )  $\delta$  136.5, 128.3, 125.6, 123.9, 120.6, 120.1, 116.9 (t,  $J = 245.5$  Hz), 111.7 (t,  $J = 3.9$  Hz), 111.2, 38.6 (t,  $J = 22.2$  Hz).

$^{19}\text{F NMR}$  (470 MHz, Chloroform- $d$ )  $\delta$  -117.70 (dd,  $J = 56.7, 15.9$  Hz). **HRMS (ESI)**: calcd for  $\text{C}_{18}\text{H}_{11}\text{Cl}_2\text{F}_2\text{N}_2$  [ $\text{M} - \text{H}$ ] $^-$ : 363.0261, found: 363.0270.

### 3,3'-(2,2-difluoroethane-1,1-diyl)bis(1H-indole-7-carbaldehyde) (4o)

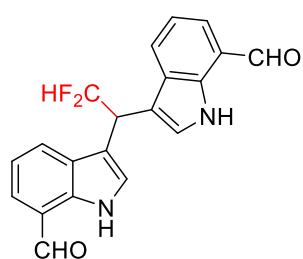

Following general procedure B to afford the title compound as a white solid (6.4 mg, 18%). TLC (PE: EA, 4:1 v/v):  $R_f = 0.6$ ;  $^1\text{H NMR}$  (500 MHz, Chloroform- $d$ )  $\delta$  10.14 (s, 4H), 7.84 (d,  $J = 7.9$  Hz, 2H), 7.68 (d,  $J = 7.2$  Hz, 2H), 7.35 (d,  $J = 2.1$  Hz, 2H), 7.24 (t,  $J = 7.6$  Hz, 2H), 6.40 (td,  $J = 56.4, 3.4$  Hz, 1H), 5.10 (td,  $J = 15.8, 3.3$  Hz, 1H).  $^{13}\text{C NMR}$  (125 MHz, Chloroform- $d$ )  $\delta$  193.5, 134.1, 129.2, 128.2, 126.7, 125.0, 120.6, 119.6, 116.8 (t,  $J = 245.2$  Hz), 111.8 (t,  $J = 3.7$  Hz), 38.6 (t,  $J = 22.4$  Hz).  $^{19}\text{F NMR}$  (470 MHz, Chloroform- $d$ )  $\delta$  -117.61 (dd,  $J = 56.6, 15.8$  Hz). **HRMS (ESI)**: calcd for  $\text{C}_{20}\text{H}_{13}\text{F}_2\text{N}_2\text{O}_2$  [ $\text{M} - \text{H}$ ] $^-$ : 351.0939, found: 351.0945.

### 3,3'-(2,2-Difluoroethane-1,1-diyl)bis(7-chloro-1H-indole) (4p)

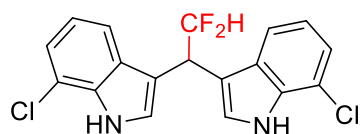

Following general procedure B to afford the title compound as a white solid (31.3 mg, 86%). TLC (PE: EA, 4:1 v/v):  $R_f = 0.6$ ;  $^1\text{H NMR}$  (500 MHz, Chloroform- $d$ )  $\delta$  8.35 (s, 2H), 7.44 (d,  $J = 8.0$  Hz, 2H), 7.20 (d,  $J = 7.6$  Hz, 4H), 7.02 (t,  $J = 7.8$  Hz, 2H), 6.35 (td,  $J = 56.4, 3.3$  Hz, 1H), 4.98 (td,  $J = 15.9, 3.2$  Hz, 1H).  $^{13}\text{C NMR}$  (125 MHz, Chloroform- $d$ )  $\delta$  133.6, 128.6, 124.1, 121.9, 120.8, 118.0, 116.9 (t,  $J = 245.4$  Hz), 112.8 (t,  $J = 3.6$  Hz), 39.1 (t,  $J = 22.3$  Hz).  $^{19}\text{F NMR}$  (470 MHz, Chloroform- $d$ )  $\delta$  -117.86 (dd,  $J = 56.3, 16.0$  Hz). **HRMS (ESI)**: calcd for

C<sub>18</sub>H<sub>11</sub>Cl<sub>2</sub>F<sub>2</sub>N<sub>2</sub> [M - H]<sup>-</sup>:363.0261, found: 363.0270.

### 3,3'-(2,2-Difluoroethane-1,1-diyl)bis(7-methyl-1H-indole) (4q)

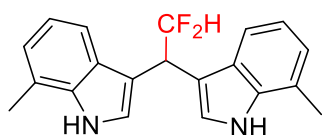

Following general procedure B to afford the title compound as a white solid (27.9 mg, 86%). TLC (PE: EA, 4:1 v/v): R<sub>f</sub> = 0.4; <sup>1</sup>H NMR (500 MHz, Chloroform-d) δ 8.09 (s, 2H), 7.44 (d, *J* = 7.2 Hz, 2H), 7.09 (d, *J* = 2.3 Hz, 2H), 7.04 – 6.99 (m, 4H), 6.36 (td, *J* = 56.6, 3.5 Hz, 1H), 5.01 (td, *J* = 16.1, 3.4 Hz, 1H), 2.47 (s, 6H). <sup>13</sup>C NMR (125 MHz, Chloroform-d) δ 135.9, 125.8, 123.2, 122.8, 120.6, 120.0, 117.3 (t, *J* = 245.0 Hz), 117.1, 112.4 (t, *J* = 3.7 Hz), 39.0 (t, *J* = 22.0 Hz), 16.7. <sup>19</sup>F NMR (470 MHz, Chloroform-d) δ -117.74 (dd, *J* = 56.5, 16.2 Hz). **HRMS (ESI)**: calcd for C<sub>20</sub>H<sub>18</sub>F<sub>2</sub>N<sub>2</sub>Na [M + Na]<sup>+</sup>:347.1330, found: 347.1319.

### 3,3'-(2,2-Difluoroethane-1,1-diyl)bis(5,6-dichloro-1H-indole)(4r)

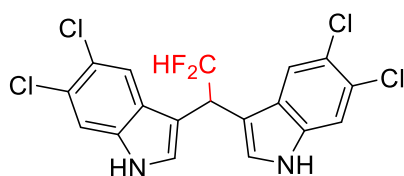

Following general procedure B to afford the title compound as a white solid (17.2 mg, 40%). TLC (PE: EA, 4:1 v/v): R<sub>f</sub> = 0.3; <sup>1</sup>H NMR (500 MHz, Chloroform-d) δ 8.23 (s, 2H), 7.53 (s, 2H), 7.46 (s, 2H), 7.18 (d, *J* = 2.4 Hz, 2H), 6.30 (td, *J* = 56.3, 3.2 Hz, 1H), 4.82 (td, *J* = 16.0, 3.1 Hz, 1H). <sup>13</sup>C NMR (125 MHz, Chloroform-d) δ 135.2, 125.8, 125.6, 125.4, 124.2, 120.4, 116.7 (t, *J* = 245.4 Hz), 113.0, 111.0 (t, *J* = 3.5 Hz), 38.8. <sup>19</sup>F NMR (470 MHz, Chloroform-d) δ -117.76 (dd, *J* = 56.6, 16.0 Hz). **HRMS (ESI)**: calcd for C<sub>18</sub>H<sub>9</sub>Cl<sub>4</sub>F<sub>2</sub>N<sub>2</sub> [M - H]<sup>-</sup>:430.9482, found: 430.9486.

### N-(2,2-difluoro-1-(1H-indol-3-yl)ethyl)aniline (7aa)

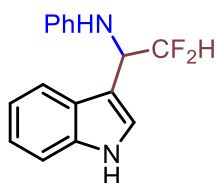

Following general procedure C to afford the title compound as a yellow oil (38.6 mg, 63%). TLC (PE : EA = 4:1 v/v): R<sub>f</sub> = 0.48; <sup>1</sup>H NMR (400 MHz, Chloroform-d) δ 8.55 (s, 1H), 7.99 (d, *J* = 8.0 Hz, 1H), 7.75 (d, *J* = 8.2 Hz, 1H), 7.61 (d, *J* = 2.5 Hz, 1H), 7.59 (dd, *J* = 8.2, 2.5 Hz, 1H), 7.55 – 7.44 (m, 3H), 7.09 (t, *J* = 7.4 Hz, 1H), 7.05 (d, *J* = 7.7 Hz, 2H), 6.50 (td, *J* = 56.0, 3.0 Hz, 1H), 5.42 (t, *J* = 12.9 Hz, 1H), 4.53 (s, 1H). <sup>13</sup>C NMR (101 MHz, Chloroform-d) δ 146.8, 136.5, 129.5, 126.2, 123.4, 122.8, 120.3, 119.1, 118.7, 115.9 (t, *J* = 246.2 Hz), 113.9, 111.6, 110.7 (dd, *J* = 4.1, 2.1 Hz), 53.9 (t, *J* = 23.2 Hz). <sup>19</sup>F NMR (377 MHz, Chloroform-d) δ -124.07 (d, *J* = 277.3 Hz), -125.68 (d, *J* = 276.6

Hz).

HRMS (ESI) calculated for  $C_{16}H_{15}F_2N_2$   $[M+H]^+$ : 273.1197; found: 273.1192.

#### *N*-(2,2-difluoro-1-(1-methyl-1H-indol-3-yl)ethyl)aniline (7ba)

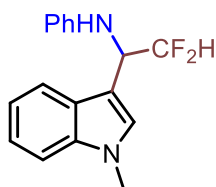

Following general procedure C to afford the title compound as a yellow oil (37.4 mg, 65%). TLC (PE : EA = 16:1 v/v):  $R_f$  = 0.35;  $^1H$  NMR (600 MHz, Chloroform- $d$ )  $\delta$  7.65 (d,  $J$  = 8.0 Hz, 1H), 7.35 (d,  $J$  = 8.2 Hz, 1H), 7.29 (t,  $J$  = 7.6 Hz, 1H), 7.18 (q,  $J$  = 7.8 Hz, 3H), 7.14 (s, 1H), 6.77 (t,  $J$  = 7.3 Hz, 1H), 6.73 (d,  $J$  = 8.1 Hz, 2H), 6.16 (td,  $J$  = 56.1, 2.9 Hz, 1H), 5.07 (td,  $J$  = 13.0, 2.8 Hz, 1H), 4.18 (s, 1H), 3.77 (s, 3H).  $^{13}C$  NMR (151 MHz, Chloroform- $d$ )  $\delta$  146.9, 137.3, 129.4, 127.9, 126.7, 122.3, 119.9, 119.1, 118.7, 115.9 (t,  $J$  = 246.7 Hz), 113.9, 109.8, 109.0 (d,  $J$  = 2.9 Hz), 53.9 (t,  $J$  = 23.1 Hz), 33.0.  $^{19}F$  NMR (377 MHz, Chloroform- $d$ )  $\delta$  -124.10 (d,  $J$  = 276.2 Hz), -125.70 (d,  $J$  = 276.6 Hz). HRMS (ESI) calculated for  $C_{17}H_{17}F_2N_2$   $[M+H]^+$ : 287.1354; found: 287.1359.

#### *N*-(2,2-difluoro-1-(2-methyl-1H-indol-3-yl)ethyl)aniline (7ca)

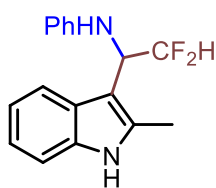

Following general procedure C to afford the title compound as a yellow oil (37.4 mg, 65%). TLC (PE : EA = 4:1 v/v):  $R_f$  = 0.42;  $^1H$  NMR (600 MHz, Chloroform- $d$ )  $\delta$  8.07 (s, 1H), 7.52 (d,  $J$  = 7.9 Hz, 1H), 7.25 (d,  $J$  = 2.6 Hz, 1H), 7.20 – 7.16 (m, 2H), 7.11 (t,  $J$  = 7.5 Hz, 1H), 7.07 (d,  $J$  = 7.1 Hz, 1H), 6.78 (t,  $J$  = 7.3 Hz, 1H), 6.73 (d,  $J$  = 8.0 Hz, 2H), 6.17 (td,  $J$  = 56.0, 3.0 Hz, 1H), 5.08 (td,  $J$  = 12.8, 3.0 Hz, 1H), 4.22 (s, 1H), 2.49 (s, 3H).

$^1H$  NMR (400 MHz, Chloroform- $d$ )  $\delta$  7.93 (s, 1H), 7.70 (d,  $J$  = 7.4 Hz, 1H), 7.30 (d,  $J$  = 8.1 Hz, 1H), 7.19 – 7.11 (m, 4H), 6.75 (t,  $J$  = 7.3 Hz, 1H), 6.70 (d,  $J$  = 8.3 Hz, 2H), 6.13 (td,  $J$  = 56.4, 3.9 Hz, 1H), 4.92 (t,  $J$  = 12.0 Hz, 1H), 4.34 (s, 1H), 2.46 (s, 3H).

$^{13}C$  NMR (151 MHz, Chloroform- $d$ )  $\delta$  147.6, 135.5, 130.1, 130.4, 130.1, 127.0, 125.1, 124.2, 119.4, 119.3, 116.9 (t,  $J$  = 246.4 Hz), 115.0, 114.6, 112.0, 110.8 (d,  $J$  = 3.4 Hz), 54.6 (t,  $J$  = 23.0 Hz), 22.4.

$^{13}C$  NMR (101 MHz, Chloroform- $d$ )  $\delta$  147.0, 135.3, 133.7, 129.3, 126.9, 121.6, 120.1, 118.6, 118.5, 116.1 (t,  $J$  = 246.7 Hz), 113.8, 110.7, 105.8 (t,  $J$  = 3.5 Hz), 54.5 (t,  $J$  = 24.0 Hz), 12.39.

$^{19}F$  NMR (377 MHz, Chloroform- $d$ )  $\delta$  -122.56 (d,  $J$  = 275.1 Hz), -124.26 (d,  $J$  = 275.1 Hz).

HRMS (ESI) calculated for  $C_{17}H_{17}F_2N_2$  ( $[M+H]^+$ ): 287.1354; found 287.1357.

### ***N*-(1-(4-chloro-1H-indol-3-yl)-2,2-difluoroethyl)aniline (7da)**

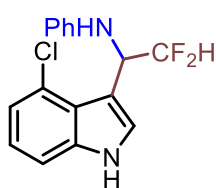

Following general procedure C to afford the title compound as a yellow oil (38.6 mg, 63%). TLC (PE : EA = 8:1 *v/v*):  $R_f$  = 0.26;  $^1\text{H}$  NMR (400 MHz, Chloroform-*d*)  $\delta$  8.26 (s, 1H), 7.31 – 7.26 (m, 2H), 7.20 – 7.09 (m, 4H), 6.78 – 6.66 (m, 3H), 6.32 (td,  $J$  = 55.6, 2.0 Hz, 1H), 5.81 (dt,  $J$  = 16.1, 7.7 Hz, 1H), 4.42 (d,  $J$  = 6.6 Hz, 1H).  $^{13}\text{C}$  NMR (101 MHz, Chloroform-*d*)  $\delta$  146.5, 138.0, 129.4, 125.6, 125.2 (d,  $J$  = 2.4 Hz), 123.5, 123.2, 121.4, 118.5, 115.9 (t,  $J$  = 247.6 Hz), 113.9, 111.4 (d,  $J$  = 6.7 Hz), 110.5, 53.0 (t,  $J$  = 21.0 Hz).

$^{19}\text{F}$  NMR (377 MHz, Chloroform-*d*)  $\delta$  -123.78 (d,  $J$  = 272.0 Hz), -132.72 (d,  $J$  = 272.0 Hz).

HRMS (ESI) calculated for  $\text{C}_{16}\text{H}_{14}\text{ClF}_2\text{N}_2$  ( $[\text{M}+\text{H}]^+$ ): 307.0808; found 307.0809.

### **methyl 3-(2,2-difluoro-1-(phenylamino)ethyl)-1H-indole-4-carboxylate (7ea)**

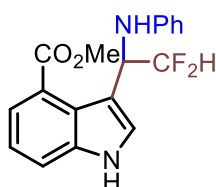

Following general procedure C to afford the title compound as a yellow oil (35.2 mg, 54%). TLC (PE: EA, 8:1 *v/v*):  $R_f$  = 0.26;  $^1\text{H}$  NMR (600 MHz, Chloroform-*d*)  $\delta$  8.38 (s, 1H), 7.79 (d,  $J$  = 7.5 Hz, 1H), 7.50 (d,  $J$  = 8.1 Hz, 1H), 7.32 (d,  $J$  = 2.5 Hz, 1H), 7.23 (t,  $J$  = 7.8 Hz, 1H), 7.14 (t,  $J$  = 7.9 Hz, 2H), 6.80 – 6.58 (m, 3H), 6.21 (td,  $J$  = 56.0, 1.8 Hz, 1H), 5.92 (t,  $J$  = 13.0 Hz, 1H), 4.41 (s, 1H), 3.88 (s, 3H).  $^{13}\text{C}$  NMR (151 MHz, Chloroform-*d*)  $\delta$  168.9, 146.6, 138.0, 129.3, 126.8, 124.0, 123.9, 123.6, 121.4, 118.2, 116.3 (dd,  $J$  = 247.5, 244.7 Hz), 116.26, 113.9, 111.66 (d,  $J$  = 6.4 Hz), 53.5 (t,  $J$  = 21.3 Hz), 52.4.  $^{19}\text{F}$  NMR (377 MHz, Chloroform-*d*)  $\delta$  -124.76 (d,  $J$  = 273.2 Hz), -131.33 (d,  $J$  = 273.2 Hz).

HRMS (ESI) calculated for  $\text{C}_{18}\text{H}_{17}\text{F}_2\text{N}_2\text{O}_2$  ( $[\text{M}+\text{H}]^+$ ): 331.1252; found 331.1255.

### ***N*-(2,2-difluoro-1-(4-nitro-1H-indol-3-yl)ethyl)aniline (7fa)**

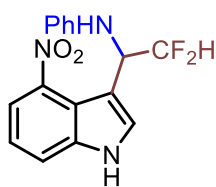

Following general procedure C to afford the title compound as a yellow oil (32.4 mg, 32%). TLC (PE: EA, 8:1 *v/v*):  $R_f$  = 0.18;  $^1\text{H}$  NMR (600 MHz, Chloroform-*d*)  $\delta$  8.69 (s, 1H), 7.98 (d,  $J$  = 7.9 Hz, 1H), 7.68 (d,  $J$  = 8.1 Hz, 1H), 7.53 (s, 1H), 7.29 (t,  $J$  = 8.0 Hz, 1H), 7.15 (t,  $J$  = 7.9 Hz, 2H), 6.74 (s, 1H), 6.71 (d,  $J$  = 8.3 Hz, 2H), 6.12 (td,  $J$  = 56.2, 2.1 Hz, 1H), 5.73 (t,  $J$  = 12.8 Hz, 1H), 4.40 (d,  $J$  = 4.9 Hz, 1H).  $^{13}\text{C}$  NMR (151 MHz, Chloroform-*d*)  $\delta$  146.0, 143.1, 139.3, 129.5, 129.0, 121.4, 119.0, 118.8, 118.7, 118.0, 115.7 (t,  $J$  = 245.1 Hz), 114.0, 110.7 (d,  $J$  = 4.8 Hz), 53.25 (t,  $J$  = 21.8 Hz).  $^{19}\text{F}$  NMR

(377 MHz, Chloroform-d)  $\delta$  -127.01 (d,  $J = 277.7$  Hz), -129.05 (d,  $J = 278.2$  Hz).

**HRMS (ESI):** calcd for  $C_{16}H_{14}F_2N_3O_2$   $[M+H]^+$ : 318.1049, found: 318.1046.

### 3-(2,2-difluoro-1-(phenylamino)ethyl)-1H-indol-4-yl acetate (7ga)

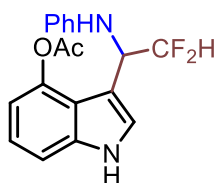

Following general procedure C to afford the title compound as a yellow oil (63.4 mg, 96%). TLC (PE: EA, 4:1 v/v):  $R_f = 0.28$ ;  $^1H$  NMR (400 MHz, Chloroform-d)  $\delta$  8.26 (s, 1H), 7.25 (t,  $J = 8.2$  Hz, 1H), 7.22 – 7.12 (m, 4H), 6.93 (dd,  $J = 7.5, 0.9$  Hz, 1H), 6.75 (t,  $J = 7.3$  Hz, 1H), 6.67 (d,  $J = 7.8$  Hz, 2H), 6.20 (td,  $J = 55.9, 2.7$  Hz, 1H), 5.17-5.19 (m, 1H), 4.34 (d,  $J = 6.0$  Hz, 1H), 2.24 (s, 3H).  $^{13}C$  NMR (101 MHz,  $CDCl_3$ )  $\delta$  170.0, 146.7, 143.7, 138.8, 129.5, 124.5, 123.0, 118.7, 118.6, 116.0 (t,  $J = 245.1$  Hz), 113.83, 113.6, 109.6, 53.9 (dd,  $J = 23.7, 21.4$  Hz), 21.2.  $^{19}F$  NMR (377 MHz, Chloroform-d)  $\delta$  -122.95 (d,  $J = 275.2$  Hz), -129.49 (d,  $J = 275.2$  Hz). **HRMS (ESI):** calcd for  $C_{18}H_{17}F_2N_2O_2$   $[M+H]^+$ : 331.1252, found: 331.1253.

### 3-(2,2-difluoro-1-(phenylamino)ethyl)-1H-indole-5-carbaldehyde (7ha)

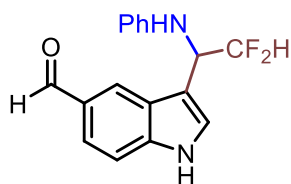

Following general procedure C to afford the title compound as a yellow oil (40.0 mg, 67%). TLC (PE : EA = 4:1 v/v):  $R_f = 0.18$ ;  $^1H$  NMR (600 MHz, Chloroform-d)  $\delta$  10.04 (s, 1H), 8.75 (s, 1H), 7.93 (s, 1H), 7.77 (d,  $J = 8.3$  Hz, 1H), 7.68 (d,  $J = 8.3$  Hz, 1H), 7.50 (d,  $J = 2.3$  Hz, 1H), 7.17 (t,  $J = 7.9$  Hz, 2H), 6.78 (t,  $J = 7.3$  Hz, 1H), 6.70 (d,  $J = 8.0$  Hz, 2H), 6.16 (td,  $J = 56.0, 2.7$  Hz, 1H), 5.11 (t,  $J = 12.6$  Hz, 1H), 4.23 (s, 1H).  $^{13}C$  NMR (151 MHz, Chloroform-d)  $\delta$  192.6, 146.4, 136.1, 131.7, 131.4, 129.6, 128.1, 121.6, 119.6, 119.1, 115.6 (d,  $J = 246.7$  Hz), 114.4, 114.0, 111.5, 53.6 (t,  $J = 23.3$  Hz).  $^{19}F$  NMR (377 MHz, Chloroform-d)  $\delta$  -124.65 (d,  $J = 278.9$  Hz), -125.72 (d,  $J = 278.9$  Hz). **HRMS (ESI)** calculated for  $C_{17}H_{15}F_2N_2O$   $[M+H]^+$ : 301.1146; found: 301.1139.

### methyl 3-(2,2-difluoro-1-(phenylamino)ethyl)-1H-indole-5-carboxylate (7ia)

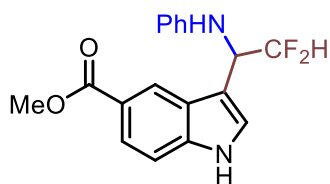

Following general procedure C to afford the title compound as a yellow oil (51.3 mg, 63%). TLC (PE : EA = 4:1 v/v):  $R_f = 0.18$ ;  $^1H$  NMR (600 MHz, Chloroform-d)  $\delta$  8.63 (s, 1H), 8.46 (s, 1H), 7.94 (d,  $J = 8.6$  Hz, 1H), 7.35 (d,  $J = 8.6$  Hz, 1H), 7.28 (d,  $J = 2.0$  Hz, 1H), 7.16 (t,  $J = 7.9$  Hz, 2H), 6.77 (t,  $J = 7.3$  Hz, 1H), 6.70 (d,  $J = 8.1$  Hz, 2H), 6.15 (td,  $J = 56.0, 2.7$  Hz, 1H), 5.11 (t,  $J = 12.3$  Hz,

1H), 4.28 (s, 1H), 3.94 (s, 3H). <sup>13</sup>C NMR (151 MHz, Chloroform-d) δ 168.3, 146.5, 139.1, 129.5, 125.9, 125.1, 124.0, 122.3, 122.0, 118.9, 115.6 (d, *J* = 246.6 Hz), 114.0, 112.0, 111.4, 53.7 (t, *J* = 23.1 Hz), 52.1. <sup>19</sup>F NMR (377 MHz, CDCl<sub>3</sub>) δ -125.15. HRMS (ESI) calculated for C<sub>18</sub>H<sub>17</sub>F<sub>2</sub>N<sub>2</sub>O<sub>2</sub> ([M+H]<sup>+</sup>): 331.1252; found 331.1252.

### 3-(2,2-difluoro-1-(phenylamino)ethyl)-1H-indole-5-carboxylic acid (7ja)

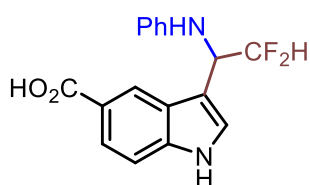

Following general procedure C to afford the title compound as a yellow oil (42.5 mg, 67%). TLC (PE: EA = 2:1 v/v): R<sub>f</sub> = 0.40;

<sup>1</sup>H NMR (600 MHz, DMSO-d<sub>6</sub>) δ 12.44 (s, 1H), 11.45 (s, 1H), 8.44 (s, 1H), 7.75 (d, *J* = 8.5 Hz, 1H), 7.55 (d, *J* = 2.2 Hz, 1H), 7.44 (d, *J* = 8.5 Hz, 1H), 7.05 (t, *J* = 7.8 Hz, 2H), 6.81 (d, *J* = 8.1 Hz, 2H), 6.55 (t, *J* = 7.2 Hz, 1H), 6.37 (dd, *J* = 56.0, 3.0 Hz, 1H), 6.21 (d, *J* = 8.7 Hz, 1H), 5.28 (q, *J* = 14.0, 12.7 Hz, 1H), 3.40 (s, 3H). <sup>13</sup>C NMR (151 MHz, DMSO-d<sub>6</sub>) δ 148.0, 139.2, 129.2, 126.8, 126.5, 123.0, 122.5, 122.0, 117.1, 116.7 (t, *J* = 244.4 Hz), 113.6, 111.8, 111.7, 52.2 (t, *J* = 23.3 Hz). <sup>19</sup>F NMR (377 MHz, Chloroform-d) δ -117.48 (d, *J* = 273.8 Hz), -119.05 (d, *J* = 273.8 Hz). HRMS (ESI) calculated for C<sub>17</sub>H<sub>15</sub>F<sub>2</sub>N<sub>2</sub>O<sub>2</sub> [M+H]<sup>+</sup>: 317.1096; found: 317.1089

### N-(1-(5-chloro-1H-indol-3-yl)-2,2-difluoroethyl)aniline (7ka)

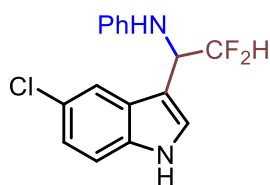

Following general procedure C to afford the title compound as a yellow oil (42.8 mg, 70%). TLC (PE: EA = 8:1 v/v): R<sub>f</sub> = 0.42; <sup>1</sup>H NMR (400 MHz, Chloroform-d) δ 8.20 (s, 1H), 7.56 (d, *J* = 8.5 Hz, 1H), 7.39 (d, *J* = 1.8 Hz, 1H), 7.26 (s, 1H), 7.17 (dd, *J* = 8.6, 7.3 Hz, 2H), 7.12 (dd, *J* = 8.5, 1.9 Hz, 1H), 6.77 (t, *J* = 7.4 Hz, 1H), 6.70 (d, *J* = 8.3 Hz, 2H), 6.13 (td, *J* = 56.0, 3.0 Hz, 1H), 5.09-5.00 (m, 1H), 4.16 (d, *J* = 6.0 Hz, 1H). <sup>13</sup>C NMR (101 MHz, Chloroform-d) δ 146.5, 134.8, 129.5, 127.4, 126.2, 124.9, 123.2, 119.0, 118.7, 115.6 (t, *J* = 246.7 Hz), 114.0, 112.6, 110.5, 53.7 (t, *J* = 23.3 Hz). <sup>19</sup>F NMR (377 MHz, Chloroform-d) δ 123.76 (d, *J* = 276.2 Hz), 122.16 (d, *J* = 276.6 Hz). HRMS (ESI): calcd for C<sub>16</sub>H<sub>14</sub>F<sub>2</sub>N<sub>2</sub>Cl [M+H]<sup>+</sup>: 307.0808, found: 307.0804.

### N-(1-(5-(benzyloxy)-1H-indol-3-yl)-2,2-difluoroethyl)aniline (7la)

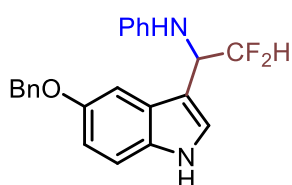

Following general procedure C to afford the title compound as a yellow oil (59.7 mg, 79%). TLC (PE: EA = 8:1 v/v): R<sub>f</sub> =



0.45;  $^1\text{H}$  NMR (400 MHz, Chloroform- $d$ )  $\delta$  8.08 (s, 1H), 7.43 (d,  $J = 7.0$  Hz, 2H), 7.38 (t,  $J = 7.2$  Hz, 2H), 7.33 (d,  $J = 7.1$  Hz, 1H), 7.28 (d,  $J = 8.8$  Hz, 1H), 7.23 (d,  $J = 2.4$  Hz, 1H), 7.21 – 7.15 (m, 2H), 7.12 (d,  $J = 2.2$  Hz, 1H), 6.97 (dd,  $J = 8.8, 2.4$  Hz, 1H), 6.77 (t,  $J = 7.3$  Hz, 1H), 6.71 (d,  $J = 7.7$  Hz, 2H), 6.14 (td,  $J = 56.0, 3.0$  Hz, 1H), 5.03 (s, 2H), 4.98 (t,  $J = 12.4$  Hz, 1H), 4.13 (s, 1H).  $^{13}\text{C}$  NMR (101 MHz, Chloroform- $d$ )  $\delta$  153.7, 147.0, 137.6, 131.7, 129.5, 128.7, 128.0, 127.8, 126.7, 123.9, 118.8, 117.1 (t,  $J = 246.6$  Hz), 114.0, 113.8, 112.3, 110.6, 102.6, 70.9, 54.1 (t,  $J = 23.4$ Hz).  $^{19}\text{F}$  NMR (377 MHz, Chloroform- $d$ )  $\delta$  -124.08 (d,  $J = 277.4$  Hz), -125.47 (d,  $J = 277.4$  Hz). **HRMS (ESI)**: calcd for  $\text{C}_{24}\text{H}_{21}\text{F}_2\text{N}_2\text{O}$   $[\text{M}+\text{H}]^+$ : 391.1616, found: 391.1611.

#### *N*-(2,2-difluoro-1-(5-methoxy-1H-indol-3-yl)ethyl)aniline (7ma)

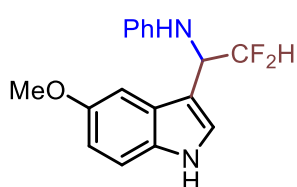

Following general procedure C to afford the title compound as a yellow oil (46.5 mg, 77%). TLC (PE: EA = 8:1  $v/v$ ):  $R_f = 0.44$ ;

$^1\text{H}$  NMR (400 MHz, Chloroform- $d$ )  $\delta$  8.08 (s, 1H), 7.28 (d,  $J = 8.8$  Hz, 1H), 7.22 (d,  $J = 2.6$  Hz, 1H), 7.18 (dd,  $J = 8.5, 7.4$  Hz, 2H), 7.04 (d,  $J = 2.3$  Hz, 1H), 6.90 (dd,  $J = 8.8, 2.4$  Hz, 1H), 6.77 (t,  $J = 7.4$  Hz, 1H), 6.73 (d,  $J = 7.7$  Hz, 2H), 6.16 (td,  $J = 56.1, 3.1$  Hz, 1H), 5.02 (t,  $J = 12.6$  Hz, 1H), 4.16 (s, 1H), 3.80 (s, 3H).  $^{13}\text{C}$  NMR (101 MHz, Chloroform- $d$ )  $\delta$  154.6, 147.0, 131.5, 129.5, 126.7, 123.9, 118.8, 115.9 (t,  $J = 246.7$  Hz), 114.0, 113.0, 112.3, 110.6, 101.0, 56.0, 54.1 (t,  $J = 23.4$ Hz).  $^{19}\text{F}$  NMR (377 MHz, Chloroform- $d$ )  $\delta$  -124.09 (d,  $J = 277.3$  Hz), -125.46 (d,  $J = 277.3$  Hz). **HRMS (ESI)**: calcd for  $\text{C}_{18}\text{H}_{17}\text{F}_2\text{N}_2\text{O}$   $[\text{M}+\text{H}]^+$ : 315.1303, found: 315.1295.

#### *N*-(2,2-difluoro-1-(5-methyl-1H-indol-3-yl)ethyl)aniline (7na)

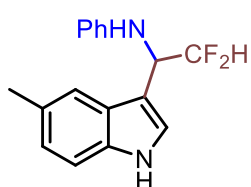

Following general procedure C to afford the title compound as a yellow oil (35.2 mg, 62%). TLC (PE: EA = 8:1  $v/v$ ):  $R_f = 0.3$ ;

$^1\text{H}$  NMR (600 MHz, Chloroform- $d$ )  $\delta$  8.03 (s, 1H), 7.48 (s, 1H), 7.29 (d,  $J = 8.4$  Hz, 1H), 7.23 (t,  $J = 8.4$  Hz, 2H), 7.19 (d,  $J = 2.4$  Hz, 1H), 7.12 (d,  $J = 8.3$  Hz, 1H), 6.82 (t,  $J = 7.3$  Hz, 1H), 6.77 (d,  $J = 8.2$  Hz, 2H), 6.19 (td,  $J = 56.0, 3.0$  Hz, 1H), 5.09 (td,  $J = 12.8, 2.9$  Hz, 1H), 4.23 (s, 1H), 2.51 (s, 3H).  $^{13}\text{C}$  NMR (151 MHz, Chloroform- $d$ )  $\delta$  146.9, 134.8, 129.7, 129.4, 126.4, 124.4, 123.5, 118.7, 118.6, 115.9 (t,  $J = 246.7$  Hz), 113.9, 111.3, 110.1 (dd,  $J = 3.9, 1.8$  Hz), 53.9 (t,  $J = 23.0$  Hz), 21.7.  $^{19}\text{F}$  NMR (377 MHz, Chloroform- $d$ )  $\delta$  -123.81 (d,

$J = 276.8$  Hz),  $-125.77$  (d,  $J = 276.7$  Hz). HRMS (ESI) calculated for  $C_{17}H_{17}F_2N_2$  ( $[M+H]^+$ ): 287.1354; found: 287.1350.

### 3-(2,2-difluoro-1-(phenylamino)ethyl)-1H-indole-6-carboxylic acid (7oa)

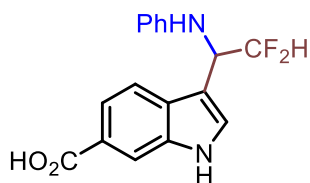

Following general procedure C to afford the title compound as a yellow oil (10.2 mg, 16%). TLC (PE: EA = 2:1 v/v):  $R_f = 0.40$ ;  
 $^1H$  NMR (600 MHz, Chloroform-d)  $\delta$  8.49 (s, 1H), 8.21 (s, 1H), 7.90 (d,  $J = 8.4$  Hz, 1H), 7.71 (d,  $J = 8.4$  Hz, 1H), 7.47 (d,  $J = 2.4$  Hz, 1H), 7.17 (t,  $J = 7.8$  Hz, 2H), 6.77 (t,  $J = 7.3$  Hz, 1H), 6.70 (d,  $J = 8.2$  Hz, 2H), 6.16 (td,  $J = 56.0, 2.7$  Hz, 1H), 5.14 – 5.07 (m, 1H).  $^{13}C$  NMR (151 MHz,  $CDCl_3$ )  $\delta$  170.2, 146.3, 135.7, 130.3, 129.4, 127.0, 123.3, 121.8, 118.9, 118.8, 115.5 (t,  $J = 245.7$  Hz), 114.5, 114.1, 113.8, 53.6 (t,  $J = 23.7$ Hz).  $^{19}F$  NMR (377 MHz, Chloroform-d)  $\delta$   $-125.26$  (d,  $J = 33.3$  Hz). HRMS (ESI) calculated for  $C_{17}H_{15}F_2N_2O_2$   $[M+H]^+$ : 317.1096; found: 317.1093

### methyl 3-(2,2-difluoro-1-(phenylamino)ethyl)-1H-indole-6-carboxylate (7pa)

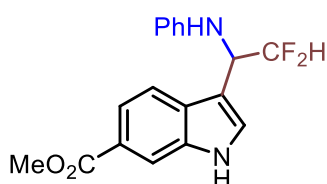

Following general procedure C to afford the title compound as a yellow oil (48.2 mg, 73%). TLC (PE: EA = 4:1 v/v):  $R_f = 0.19$ ;  
 $^1H$  NMR (400 MHz, Chloroform-d)  $\delta$  8.46 (s, 1H), 8.15 (s, 1H), 7.84 (dd,  $J = 8.4, 1.4$  Hz, 1H), 7.68 (d,  $J = 8.4$  Hz, 1H), 7.43 (d,  $J = 2.5$  Hz, 1H), 7.17 (dd,  $J = 8.5, 7.4$  Hz, 2H), 6.77 (t,  $J = 7.4$  Hz, 1H), 6.70 (d,  $J = 8.6$  Hz, 2H), 6.15 (td,  $J = 56.0, 2.9$  Hz, 1H), 5.09-5.00 (m, 1H), 4.19 (d,  $J = 6.8$  Hz, 1H), 3.94 (s, 3H).  $^{13}C$  NMR (101 MHz, Chloroform-d)  $\delta$  168.0, 146.5, 135.8, 129.9, 129.5, 126.7, 124.6, 121.4, 119.0, 118.8, 115.6 (t,  $J = 247.0$  Hz), 114.0, 113.9, 111.2, 53.7 (t,  $J = 23.4$ Hz), 52.2.  $^{19}F$  NMR (377 MHz, Chloroform-d)  $\delta$   $-125.11$  –  $-125.31$  (m). HRMS (ESI): calcd for  $C_{18}H_{17}F_2N_2O_2$   $[M+H]^+$ : 331.1253, found: 331.1254.

### N-(1-(6-chloro-1H-indol-3-yl)-2,2-difluoroethyl)aniline (7qa)

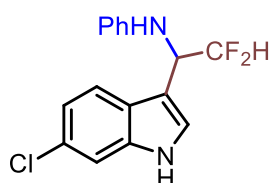

Following general procedure C to afford the title compound as a yellow oil (52.0 mg, 85%). TLC (PE: EA = 8:1 v/v):  $R_f = 0.42$ ;  
 $^1H$  NMR (400 MHz, Chloroform-d)  $\delta$  8.20 (s, 1H), 7.56 (d,  $J = 8.5$  Hz, 1H), 7.39 (d,  $J = 1.8$  Hz, 1H), 7.26 (s, 1H), 7.17 (dd,  $J = 8.5, 7.4$  Hz, 2H), 7.11

(d,  $J = 1.8$  Hz, 1H), 6.77 (t,  $J = 7.4$  Hz, 1H), 6.70 (d,  $J = 7.7$  Hz, 2H), 6.13 (td,  $J = 56.0, 3.0$  Hz, 1H), 5.09-5.00 (m, 1H), 4.16 (d,  $J = 6.0$  Hz, 1H).  $^{13}\text{C}$  NMR (101 MHz, Chloroform-d)  $\delta$  146.6, 136.8, 129.5, 128.8, 125.0, 124.0, 121.2, 120.1, 119.0, 115.7 (t,  $J = 246.9$  Hz), 113.9, 111.6, 111.0, 53.8 (t,  $J = 23.4$  Hz).  $^{19}\text{F}$  NMR (377 MHz, Chloroform-d)  $\delta$  -124.50 (d,  $J = 279.2$  Hz), -125.84 (d,  $J = 279.5$  Hz). **HRMS (ESI)**: calcd for  $\text{C}_{16}\text{H}_{14}\text{F}_2\text{N}_2\text{Cl} [\text{M} + \text{H}]^+$ : 307.0808, found: 307.0804.

### *N*-(2,2-difluoro-1-(7-methyl-1H-indol-3-yl)ethyl)aniline (7ra)

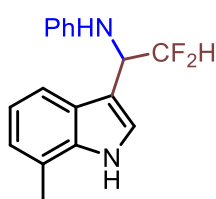

Following general procedure C to afford the title compound as a yellow oil (35.2 mg, 57%). TLC (PE: EA = 8:1 v/v):  $R_f = 0.3$ ;  $^1\text{H}$  NMR (600 MHz, Chloroform-d)  $\delta$  8.07 (s, 1H), 7.52 (d,  $J = 7.9$  Hz, 1H), 7.25 (d,  $J = 2.1$  Hz, 1H), 7.18 (t,  $J = 7.9$  Hz, 2H), 7.11 (t,  $J = 7.5$  Hz, 1H), 7.07 (d,  $J = 7.0$  Hz, 1H), 6.78 (t,  $J = 7.3$  Hz, 1H), 6.73 (d,  $J = 8.1$  Hz, 2H), 6.17 (td,  $J = 56.0, 2.9$  Hz, 1H), 5.08 (td,  $J = 12.8, 2.3$  Hz, 1H), 4.20 (s, 1H), 2.49 (s, 3H).  $^{13}\text{C}$  NMR (151 MHz, Chloroform-d)  $\delta$  146.9, 136.1, 129.4, 125.8, 123.3, 123.1, 120.9, 120.6, 118.7, 116.8, 115.9 (t,  $J = 246.7$  Hz), 113.9, 111.24 (dd,  $J = 3.9, 1.8$  Hz), 54.0 (t,  $J = 23.0$  Hz), 16.7.  $^{19}\text{F}$  NMR (377 MHz, Chloroform-d)  $\delta$  -124.00 (d,  $J = 277.2$  Hz), -125.80 (d,  $J = 276.4$  Hz). **HRMS (ESI)** calculated for  $\text{C}_{17}\text{H}_{17}\text{F}_2\text{N}_2 [\text{M} + \text{H}]^+$ : 287.1354; found: 287.1350

### *N*-(2,2-difluoro-1-(7-methoxy-1H-indol-3-yl)ethyl)aniline (7sa)

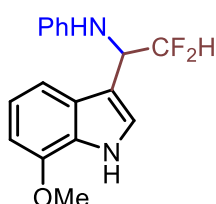

Following general procedure C to afford the title compound as a yellow oil (50.1 mg, 82%). TLC (PE: EA, 8:1 v/v):  $R_f = 0.4$ ;  $^1\text{H}$  NMR (600 MHz, Chloroform-d)  $\delta$  8.44 (s, 1H), 7.30 (d,  $J = 8.1$  Hz, 1H), 7.25 – 7.19 (m, 3H), 7.13 (t,  $J = 7.9$  Hz, 1H), 6.82 (t,  $J = 7.3$  Hz, 1H), 6.77 (d,  $J = 7.7$  Hz, 2H), 6.74 (d,  $J = 7.7$  Hz, 1H), 6.20 (td,  $J = 56.0, 3.1$  Hz, 1H), 5.10 (t,  $J = 12.4$  Hz, 1H), 4.26 (s, 1H), 4.00 (s, 3H).  $^{13}\text{C}$  NMR (151 MHz, Chloroform-d)  $\delta$  146.9, 146.4, 129.4, 127.5, 127.1, 122.9, 120.8, 118.7, 115.9 (t,  $J = 246.7$  Hz), 113.9, 111.7, 111.1 (dd,  $J = 3.9, 1.8$  Hz), 102.5, 55.5, 54.0 (t,  $J = 23.1$  Hz).  $^{19}\text{F}$  NMR (377 MHz, Chloroform-d)  $\delta$  -123.90 (d,  $J = 277.3$  Hz), -125.74 (d,  $J = 277.2$  Hz). **HRMS (ESI)**: calcd for  $\text{C}_{17}\text{H}_{17}\text{F}_2\text{N}_2\text{O} [\text{M} + \text{H}]^+$ : 303.1303, found: 303.1308.

### 3-(2,2-difluoro-1-(phenylamino)ethyl)-1H-indole-7-carbaldehyde (7ta)

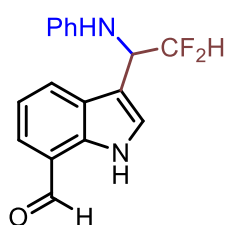

Following general procedure C to afford the title

compound as a yellow oil (32.4 mg, 57%). TLC (PE: EA, 8:1 v/v):  $R_f$  = 0.4;  $^1\text{H}$  NMR (600 MHz, Chloroform-d)  $\delta$  10.16 (s, 1H), 10.12 (s, 1H), 7.98 (d,  $J$  = 7.9 Hz, 1H), 7.70 (d,  $J$  = 7.3 Hz, 1H), 7.42 (s, 1H), 7.30 (t,  $J$  = 7.6 Hz, 1H), 7.17 (t,  $J$  = 7.7 Hz, 2H), 6.77 (t,  $J$  = 7.3 Hz, 1H), 6.71 (d,  $J$  = 8.0 Hz, 2H), 6.15 (td,  $J$  = 56.0, 2.6 Hz, 1H), 5.16 – 5.06 (m, 1H), 4.19 (d,  $J$  = 6.5 Hz, 1H).  $^{13}\text{C}$  NMR (151 MHz, Chloroform-d)  $\delta$  193.6, 146.5, 134.3, 129.5, 129.5, 127.6, 126.7, 125.2, 120.8, 120.0, 119.0, 115.7 (t,  $J$  = 246.8 Hz), 114.0, 111.0, 53.8 (t,  $J$  = 23.4 Hz).  $^{19}\text{F}$  NMR (377 MHz, Chloroform-d)  $\delta$  -124.45 (d,  $J$  = 279.2 Hz), -125.42 (d,  $J$  = 278.9 Hz). **HRMS (ESI)**: calcd for  $\text{C}_{17}\text{H}_{15}\text{F}_2\text{N}_2\text{O}$   $[\text{M}+\text{H}]^+$ : 300.1068, found: 300.1066.

### N-(1-(5,6-dichloro-1H-indol-3-yl)-2,2-difluoroethyl)aniline (7ua)

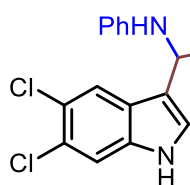

Following general procedure C to afford the title compound as a yellow oil (51.0 mg, 75%). TLC (PE : EA = 8:1 v/v):  $R_f$  = 0.42;  $^1\text{H}$  NMR (400 MHz, Chloroform-d)  $\delta$  8.54 (s, 1H), 8.09 (s, 1H), 7.83 (s, 1H), 7.63 (d,  $J$  = 2.5 Hz, 1H), 7.51 (t,  $J$  = 7.9 Hz, 2H), 7.12 (t,  $J$  = 7.4 Hz, 1H), 7.02 (d,  $J$  = 7.9 Hz, 2H), 6.45 (td,  $J$  = 56.0, 2.9 Hz, 1H), 5.41 – 5.25 (m, 1H), 4.50 (s, 1H).  $^{13}\text{C}$  NMR (101 MHz, Chloroform-d)  $\delta$  146.3, 135.2, 129.6, 126.9, 126.1, 125.5, 124.7, 120.4, 119.2, 115.5 (t,  $J$  = 246.7 Hz), 114.0, 113.1, 110.6, 53.7 (t,  $J$  = 23.6 Hz).  $^{19}\text{F}$  NMR (377 MHz, Chloroform-d)  $\delta$  -124.52 (d,  $J$  = 279.6 Hz), -125.87 (d,  $J$  = 279.6 Hz). **HRMS (ESI)**: calcd for  $\text{C}_{16}\text{H}_{13}\text{F}_2\text{N}_2\text{Cl}$   $[\text{M}+\text{H}]^+$ : 341.0418, found: 341.0413.

### methyl 6-bromo-3-(2,2-difluoro-1-(phenylamino)ethyl)-1H-indole-4-carboxylate (7va)

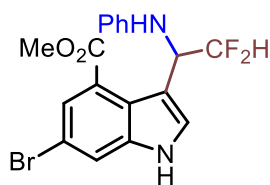

Following general procedure C to afford the title compound as a yellow oil (51.3 mg, 63%). TLC (PE : EA = 8:1 v/v):  $R_f$  = 0.26;  $^1\text{H}$  NMR (400 MHz, Chloroform-d)  $\delta$  8.43 (s, 1H), 7.90 (d,  $J$  = 1.6 Hz, 1H), 7.68 (d,  $J$  = 1.6 Hz, 1H), 7.37 (d,  $J$  = 2.3 Hz, 1H), 7.16 (t,  $J$  = 7.9 Hz, 2H), 6.74 (t,  $J$  = 7.3 Hz, 1H), 6.69 (d,  $J$  = 7.9 Hz, 2H), 6.20 (td,  $J$  = 56.0, 1.6 Hz, 1H), 5.89 (td,  $J$  = 13.0, 5.7 Hz, 1H), 4.39 (d,  $J$  = 6.7 Hz, 1H), 3.89 (s, 3H).  $^{13}\text{C}$  NMR (101 MHz,  $\text{CDCl}_3$ )  $\delta$  167.6, 146.4, 138.7, 129.4, 127.4, 126.8, 124.9, 123.2, 118.7, 118.4, 116.10 (t,  $J$  = 247.5 Hz), 114.54, 113.9, 112.0 (d,  $J$  = 5.1 Hz), 53.2 (t,  $J$  = 23.8 Hz), 52.7.  $^{19}\text{F}$  NMR (377 MHz, Chloroform-d)  $\delta$  -125.56 (d,  $J$  = 274.5 Hz), -130.63 (d,  $J$  = 274.5 Hz).

HRMS(ESI) calculated for C<sub>18</sub>H<sub>16</sub>BrF<sub>2</sub>N<sub>2</sub>O<sub>2</sub> ([M+H]<sup>+</sup>): 409.0357; found 409.0355.

### N-(2,2-difluoro-1-(1H-indol-3-yl)ethyl)-4-(trifluoromethyl)aniline (7ab)

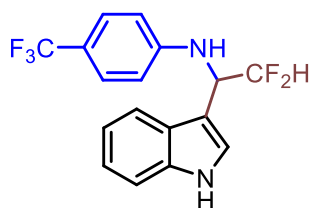

Following general procedure C to afford the title compound as a yellow oil (38.4 mg, 56%). TLC (PE : EA = 8:1 v/v): R<sub>f</sub> = 0.21; <sup>1</sup>H NMR (600 MHz, Chloroform-d) δ 8.26 (s, 1H), 7.65 (d, *J* = 8.0 Hz, 1H), 7.44 (t, *J* = 9.0 Hz, 3H), 7.33 – 7.27 (m, 2H), 7.21 (t, *J* = 7.5 Hz, 1H), 6.76 (d, *J* = 8.5 Hz, 2H), 6.20 (td, *J* = 55.7, 2.8 Hz, 1H), 5.21 – 5.08 (m, 1H), 4.54 (d, *J* = 6.6 Hz, 1H). <sup>13</sup>C NMR (151 MHz, Chloroform-d) δ 149.4, 136.5, 126.8 (q, *J* = 3.8 Hz), 126.0, 124.9 (q, *J* = 270.5 Hz), 123.4, 123.1, 120.6, 120.3 (q, *J* = 32.7 Hz), 118.8, 115.6 (t, *J* = 247.0 Hz), 113.0, 111.8, 110.1 (d, *J* = 4.9 Hz), 53.44 (t, *J* = 22.9 Hz). <sup>19</sup>F NMR (471 MHz, Chloroform-d) δ -61.19, -123.02 (d, *J* = 277.6 Hz), -126.65 (d, *J* = 277.6 Hz). HRMS (ESI): calcd for C<sub>17</sub>H<sub>12</sub>F<sub>5</sub>N<sub>2</sub> [M - H]<sup>-</sup>: 340.0993, found: 340.0984.

### N-(2,2-difluoro-1-(1H-indol-3-yl)ethyl)-4-ethynylaniline (7ac)

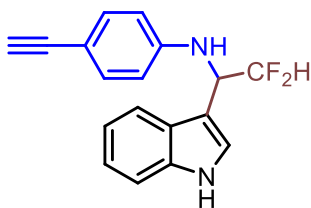

Following general procedure C to afford the title compound as a yellow oil (35.3 mg, 60%). TLC (PE : EA = 8:1 v/v): R<sub>f</sub> = 0.16; <sup>1</sup>H NMR (600 MHz, Chloroform-d) δ 8.26 (s, 1H), 7.63 (d, *J* = 8.0 Hz, 1H), 7.43 (d, *J* = 8.2 Hz, 1H), 7.33 (d, *J* = 8.5 Hz, 2H), 7.30 – 7.26 (m, 2H), 7.19 (t, *J* = 7.5 Hz, 1H), 6.66 (d, *J* = 8.5 Hz, 2H), 6.18 (td, *J* = 55.8, 2.9 Hz, 1H), 5.17 – 5.06 (m, 1H), 4.39 (d, *J* = 6.6 Hz, 1H), 2.98 (s, 1H). <sup>13</sup>C NMR (151 MHz, Chloroform-d) δ 147.1, 136.3, 133.5, 130.8, 126.0, 123.2, 122.9, 120.4, 118.8, 115.5 (t, *J* = 246.9 Hz), 113.3, 111.6, 111.4, 84.3, 75.1, 53.4 (t, *J* = 23.0 Hz). <sup>19</sup>F NMR (377 MHz, Chloroform-d) δ -123.49 (d, *J* = 277.5 Hz), -126.32 (d, *J* = 277.5 Hz). HRMS (ESI): calcd for C<sub>18</sub>H<sub>15</sub>F<sub>2</sub>N<sub>2</sub> [M + H]<sup>+</sup>: 297.1198, found: 297.1194.

### 3-(tert-butyl)-N-(2,2-difluoro-1-(1H-indol-3-yl)ethyl)aniline (7ad)

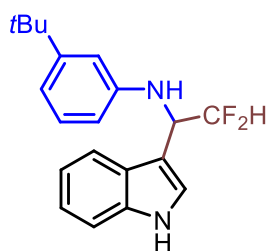

Following general procedure C to afford the title compound as a yellow oil (35.0 mg, 53%). TLC (PE : EA = 8:1 v/v): R<sub>f</sub> = 0.21; <sup>1</sup>H NMR (600 MHz, Chloroform-d) δ 7.73 (d, *J* = 8.0 Hz, 1H), 7.40 (d, *J* = 8.2 Hz, 1H), 7.29 (t, *J* = 7.6 Hz, 1H), 7.26 (d, *J* = 2.2 Hz, 1H), 7.22 (t, *J* = 7.5 Hz, 1H), 7.17 (t, *J* = 7.9 Hz, 1H),

6.87 (d,  $J = 7.8$  Hz, 1H), 6.81 (s, 1H), 6.60 (dd,  $J = 8.0, 1.9$  Hz, 1H), 6.21 (td,  $J = 56.1, 3.0$  Hz, 1H), 5.12 (t,  $J = 12.6$  Hz, 1H), 4.25 – 4.20 (m, 1H), 1.31 (s, 8H).  $^{13}\text{C}$  NMR (151 MHz, Chloroform- $d$ )  $\delta$  152.6, 146.6, 136.4, 129.1, 126.2, 123.4, 122.8, 120.3, 119.1, 116.1, 116.0 (t,  $J = 246.6$  Hz), 111.9, 111.6, 110.9, 110.5, 54.0 (t,  $J = 23.1$  Hz), 34.7, 31.4.  $^{19}\text{F}$  NMR (377 MHz, Chloroform- $d$ )  $\delta$  -123.99 (d,  $J = 276.7$  Hz), -125.32 (d,  $J = 276.7$  Hz). HRMS (ESI): calcd for  $\text{C}_{20}\text{H}_{23}\text{F}_2\text{N}_2$  [ $\text{M} + \text{H}$ ] $^+$ : 329.1823, found: 329.1824.

### 2-bromo-*N*-(2,2-difluoro-1-(1H-indol-3-yl)ethyl)aniline (7ae)

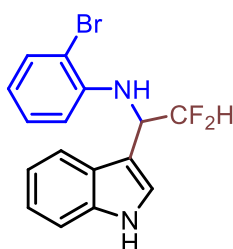

Following general procedure C to afford the title compound as a yellow oil (22.4 mg, 32%). TLC (PE : EA = 8:1 v/v):  $R_f = 0.29$ ;  $^1\text{H}$  NMR (400 MHz, Chloroform- $d$ )  $\delta$  8.24 (s, 1H), 7.71 (d,  $J = 7.9$  Hz, 1H), 7.47 (d,  $J = 7.9$  Hz, 1H), 7.43 (d,  $J = 8.1$  Hz, 1H), 7.29 (t,  $J = 2.9$  Hz, 2H), 7.21 (t,  $J = 7.5$  Hz, 1H), 7.13 (t,  $J = 7.8$  Hz, 1H), 6.76 (d,  $J = 8.1$  Hz, 1H), 6.63 (t,  $J = 7.6$  Hz, 1H), 6.19 (td,  $J = 55.9, 3.0$  Hz, 1H), 5.20 – 5.09 (m, 1H), 5.01 (d,  $J = 6.8$  Hz, 1H).

$^{13}\text{C}$  NMR (101 MHz, Chloroform- $d$ )  $\delta$  143.5, 136.4, 132.6, 128.5, 126.0, 123.4, 122.8, 120.4, 119.0, 118.9, 115.5 (t,  $J = 247.5$  Hz), 112.5, 111.6, 110.6, 110.1, 53.8 (t,  $J = 23.2$  Hz).

$^{19}\text{F}$  NMR (377 MHz, Chloroform- $d$ )  $\delta$  -123.92 (d,  $J = 277.5$  Hz), -125.84 (d,  $J = 277.5$  Hz).

HRMS (ESI) calculated for  $\text{C}_{16}\text{H}_{14}\text{BrF}_2\text{N}_2$  ( $[\text{M} + \text{H}]^+$ ): 351.0302; found 351.0304

### *N*-(2,2-difluoro-1-(1H-indol-3-yl)ethyl)-1-phenyl-1H-pyrazol-5-amine (7af)

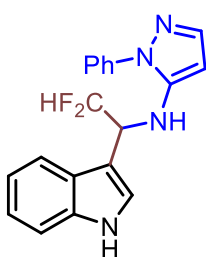

Following general procedure C to afford the title compound as a yellow oil (38.6 mg, 57%). TLC (PE : EA = 4:1 v/v):  $R_f = 0.20$ ;  $^1\text{H}$  NMR (600 MHz, Chloroform- $d$ )  $\delta$  8.35 (s, 1H), 7.55 (d,  $J = 8.0$  Hz, 1H), 7.52 (d,  $J = 8.4$  Hz, 2H), 7.51 (s, 1H), 7.45 (t,  $J = 7.6$  Hz, 2H), 7.38 (d,  $J = 8.1$  Hz, 1H), 7.34 (t,  $J = 7.0$  Hz, 1H), 7.25 – 7.19 (m, 2H), 7.12 (t,  $J = 7.5$  Hz, 1H), 6.28 (td,  $J = 56.6, 3.3$  Hz, 1H), 4.56 (ddd,  $J = 18.0, 13.8, 3.3$  Hz, 1H), 3.65 (s, 2H).  $^{13}\text{C}$  NMR (151 MHz, Chloroform- $d$ )  $\delta$  142.9, 140.3, 138.5, 136.3, 129.5, 127.6, 126.7, 124.1, 123.0, 122.7, 120.0, 119.2, 117.2 (t,  $J = 244.9$  Hz), 111.4, 110.3 (dd,  $J = 5.5, 2.4$  Hz), 99.1 (t,  $J = 3.1$  Hz), 37.7 (t,  $J = 22.1$  Hz).  $^{19}\text{F}$  NMR (377 MHz, Chloroform- $d$ )  $\delta$  -116.58 (d,  $J = 274.5$  Hz), -118.83 (d,  $J = 273.9$  Hz). HRMS (ESI): calcd for  $\text{C}_{19}\text{H}_{17}\text{F}_2\text{N}_4$  [ $\text{M} + \text{H}$ ] $^+$ : 339.1416,

found: 339.1410.

### *N*-(2,2-difluoro-1-(1*H*-indol-3-yl)ethyl)cyclopropanamine (**7ag**)

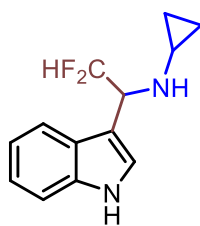

Following general procedure C to afford the title compound as a yellow oil (29.3 mg, 62%). TLC (PE : EA = 4:1 v/v):  $R_f$  = 0.20;  $^1\text{H}$  NMR (400 MHz, Chloroform- $d$ )  $\delta$  8.28 (s, 1H), 7.75 (d,  $J$  = 7.9 Hz, 1H), 7.41 (d,  $J$  = 8.1 Hz, 1H), 7.27 (d,  $J$  = 7.9 Hz, 1H), 7.24 (d,  $J$  = 2.7 Hz, 1H), 7.19 (td,  $J$  = 8.1, 1.1 Hz, 1H), 6.07 (td,  $J$  = 56.6, 3.4 Hz, 1H), 4.40 (ddd,  $J$  = 14.6, 13.3, 3.3 Hz, 1H), 2.33 – 2.22 (m, 1H), 0.54 – 0.38 (m, 4H).  $^{13}\text{C}$  NMR (101 MHz, Chloroform- $d$ )  $\delta$  136.3, 126.9, 123.3, 122.6, 120.1, 119.3, 1196.7 (t,  $J$  = 245.2 Hz), 111.8 (t,  $J$  = 3.5 Hz), 111.5, 57.8 (t,  $J$  = 22.4 Hz), 29.6, 7.0, 6.8.  $^{19}\text{F}$  NMR (377 MHz, Chloroform- $d$ )  $\delta$  -123.50 (d,  $J$  = 277.8 Hz), -124.4 (d,  $J$  = 277.8 Hz).

HRMS (ESI) calculated for  $\text{C}_{13}\text{H}_{15}\text{F}_2\text{N}_2$  ( $[\text{M}+\text{H}]^+$ ): 237.1197; found 237.1194.

## 4 Gram-scale Synthesis of product **3b** and **4b**

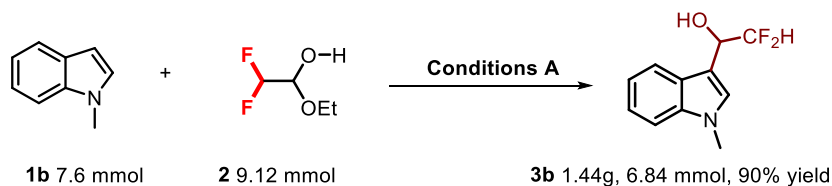

In an oven-dried 100 ml round bottom flask, a mixture of 1-methylindole **1b** (7.6 mmol, 1.0 equiv), 1-ethoxy-2,2-difluoroethan-1-ol **2** (1.15g, 9.12 mmol, 1.2 equiv),  $\text{K}_2\text{CO}_3$  (525.2 mg, 3.8 mmol, 0.5 equiv) in TFE (20 mL) was stirred at 60 °C for 6 h. The reaction mixture was then diluted with Ethyl acetate (30 ml) and washed with brine. The aqueous phase was extracted with Ethyl acetate. The organic layers were combined, washed with brine and dried over  $\text{Na}_2\text{SO}_4$ . The solvent was removed in vacuo, and the residue was purified by column chromatography (PE/EA= 4/1) to afford the desired 1.44 g of product **3b**, yield 90%.

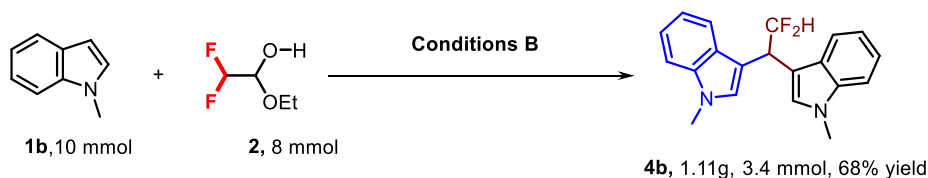

In an oven-dried pressure tube, a mixture of 1-methylindole **1b** (7.6 mmol, 1.0 equiv), 1-ethoxy-2,2-difluoroethan-1-ol **2** (1.15g, 9.12 mmol, 1.2 equiv), (*S*)-(+)-1,1'-Binaphthyl-2,2'-diyl hydrogenphosphate (10 mol%) in DCM (20mL) was

stirred at room temperature for 1h. The reaction mixture was then diluted with Ethyl acetate (30 ml) and washed with brine. The aqueous phase was extracted with Ethyl acetate. The organic layers were combined, washed with brine and dried over Na<sub>2</sub>SO<sub>4</sub>. The solvent was removed in vacuo, and the residue was purified by column chromatography (PE/EA= 4/1) to afford the desired 1.11 g of product **4b**, yield 68%.

## 5 Derivatization of product **3b** and Characterization Data of

### Compounds **9-13** and **4b**.

#### 5.1 Compound **9**

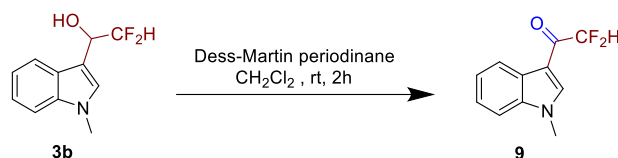

In an oven-dried Pressure tube, a mixture of 2,2-Difluoro-1-(1-methyl-1H-indol-3-yl)ethan-1-ol **3b** (0.2 mmol, 1.0 equiv), Dess-Martin periodinane (313.8 mg, 0.74 mmol, 3.7 equiv), in CH<sub>2</sub>Cl<sub>2</sub> (5 mL) was stirred at room temperature for 2 h. The reaction mixture was then diluted with ethyl acetate (10 ml) and washed with brine. The aqueous phase was extracted with Ethyl acetate. The organic layers were combined, washed with brine and dried over Na<sub>2</sub>SO<sub>4</sub>. The solvent was removed in vacuo, and the residue was purified by column chromatography (PE/EA= 4/1) to afford the desired 14 mg of product **9**, yield 53%.<sup>2</sup>

#### 2,2-Difluoro-1-(1-methyl-1H-indol-3-yl)ethan-1-one (**9**)

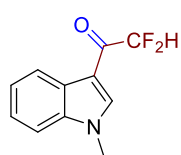

According to the above procedure and provide the title compound as a yellow oil (22.2 mg, 53%). TLC (PE: EA, 4:1 v/v): R<sub>f</sub> = 0.4; <sup>1</sup>H NMR (500 MHz, Chloroform-*d*) δ 8.41 – 8.39 (m, 1H), 8.00 (s, 1H), 7.39 – 7.35 (m, 3H), 6.10 (t, *J* = 54.3 Hz, 1H), 3.89 (s, 3H). <sup>13</sup>C NMR (125 MHz, Chloroform-*d*) δ 182.8 (t, *J* = 25.3 Hz), 137.9 (t, *J* = 7.1 Hz), 137.2, 126.9, 124.3, 123.6, 122.6, 112.2 (t, *J* = 254.0 Hz), 110.4 (t, *J* = 2.1 Hz), 109.9, 33.9. <sup>19</sup>F NMR (470 MHz, Chloroform-*d*) δ -112.25- -120.00 (m), -120.11- -126.03 (m).



## 5.2 Compound 10

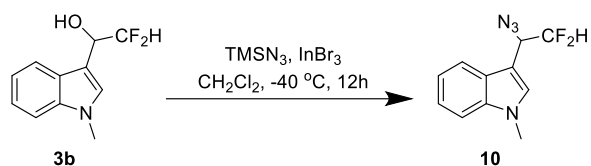

In an oven-dried Pressure tube, a mixture of 2,2-Difluoro-1-(1-methyl-1H-indol-3-yl)ethan-1-ol **3b** (0.2 mmol, 1.0 equiv), TMSN<sub>3</sub> (34.6 mg, 0.3 mmol, 1.5 equiv), InBr<sub>3</sub> (35.5mg, 0.1 mmol, 0.5 equiv) in CH<sub>2</sub>Cl<sub>2</sub> (1 ml) was stirred at -40°C for 12 h. The reaction mixture was then diluted with ethyl acetate (10 ml). The aqueous phase was extracted with Ethyl acetate. The organic layers were combined and dried over Na<sub>2</sub>SO<sub>4</sub>. The solvent was removed in vacuo, and the residue was purified by column chromatography (PE/EA= 4/1) to afford the desired 19 mg of product **10**, yield 57%.

### 3-(1-azido-2,2-Difluoroethyl)-1-methyl-1H-indole (**10**)

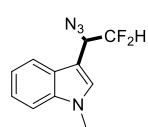

According to the above procedure and provide the title compound as a yellow oil (26.9 mg, 57%). TLC (PE: EA, 4:1 v/v): R<sub>f</sub> = 0.7; <sup>1</sup>H NMR (500 MHz, Chloroform-*d*) δ 7.66 (d, *J* = 8.0 Hz, 1H), 7.35 (d, *J* = 8.2 Hz, 1H), 7.30 (t, *J* = 7.6 Hz, 1H), 7.20 (s, 1H), 7.19 (t, *J* = 7.3 Hz, H), 6.00 (td, *J* = 55.6, 3.8 Hz, 1H), 4.97 (td, *J* = 12.5, 3.7 Hz, 1H), 3.80 (s, 3H). <sup>13</sup>C NMR (125 MHz, Chloroform-*d*) δ 137.0, 128.7, 126.6, 122.6, 120.3, 118.9, 114.9 (t, *J* = 246.3 Hz), 109.8, 104.7 (t, *J* = 3.1 Hz), 59.6 (t, *J* = 24.0 Hz), 33.1. <sup>19</sup>F NMR (470 MHz, Chloroform-*d*) δ -122.32 (ddd, *J* = 279.3, 55.5, 12.0 Hz), -123.78 (ddd, *J* = 279.4, 55.5, 13.3 Hz).

## 5.3 Compound 11

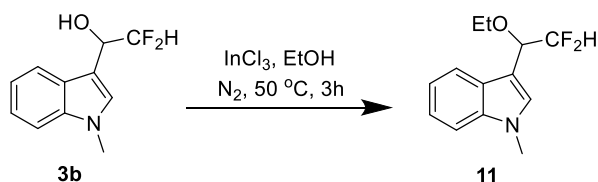

In an oven-dried Pressure tube, a mixture of 2,2-Difluoro-1-(1-methyl-1H-indol-3-yl)ethan-1-ol **3b** (0.2 mmol, 1.0 equiv), InCl<sub>3</sub> (8.4 mg, 0.04 mmol, 0.2 equiv) in EtOH (1 ml) was stirred at 50°C with nitrogen protection for 3h. The reaction

mixture was then diluted with ethyl acetate (10 ml). The aqueous phase was extracted with Ethyl acetate. The organic layers were combined and dried over Na<sub>2</sub>SO<sub>4</sub>. The solvent was removed in vacuo, and the residue was purified by column chromatography (PE/EA= 32/1) to afford the desired 26.3 mg of product **11**, yield 75%.

### 3-(1-ethoxy-2,2-Difluoroethyl)-1-methyl-1H-indole (**11**)

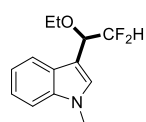

According to the above procedure and provide the title compound as a yellow oil (33.9 mg, 75%). TLC (PE: EA, 32:1 *v/v*): R<sub>f</sub>= 0.3; <sup>1</sup>H NMR (500 MHz, Chloroform-*d*) δ 7.73 (d, *J* = 8.0 Hz, 1H), 7.33 (d, *J* = 8.2 Hz, 1H), 7.26 (t, *J* = 7.9 Hz, 1H), 7.15 (t, *J* = 7.5 Hz, 1H), 7.13 (s, 1H), 5.98 (td, *J* = 56.1, 4.5 Hz, 1H), 4.76 (td, *J* = 10.8, 4.5 Hz, 1H), 3.80 (s, 3H), 3.61 – 3.49 (m, 2H), 1.21 (t, *J* = 7.0 Hz, 3H). <sup>13</sup>C NMR (125 MHz, Chloroform-*d*) δ 137.2, 128.8, 127.0, 122.1, 119.8, 117.1-113.2 (m), 109.5, 108.2-108.1 (m), 77.2, 75.4-75.0 (m), 64.7, 32.9, 15.2. <sup>19</sup>F NMR (470 MHz, Chloroform-*d*) δ -124.78 (ddd, *J* = 282.3, 56.8, 10.6 Hz), -125.95 (ddd, *J* = 282.3, 56.8, 12.1 Hz).

### 5.4 Compound **4b**

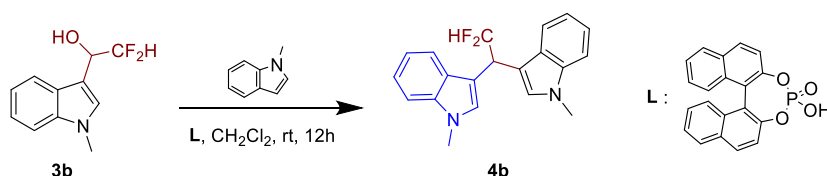

In an oven-dried Pressure tube, a mixture of 2,2-Difluoro-1-(1-methyl-1H-indol-3-yl)ethan-1-ol **3b** (0.2 mmol, 1.0 equiv), 1-Methyl-1H-indole (26.2 mg, 0.2 mmol, 1 equiv), 1,1'-Binaphthyl-2,2'-diyl hydrogenphosphate (6.9mg, 0.02 mmol, 0.1 equiv) in CH<sub>2</sub>Cl<sub>2</sub> (1 ml) was stirred at room temperature for 12 h. The reaction mixture was then diluted with ethyl acetate (10 ml) and washed with brine. The aqueous phase was extracted with Ethyl acetate. The organic layers were combined, washed with brine and dried over Na<sub>2</sub>SO<sub>4</sub>. The solvent was removed in vacuo, and the residue was purified by column chromatography (PE/EA= 4/1) to afford the desired 35.7 mg of product **4b**, yield 55%.<sup>2</sup>

## 5.5 Compound 12

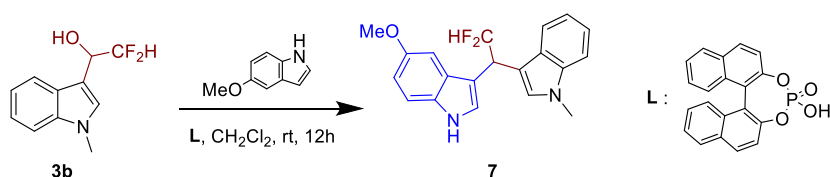

In an oven-dried Pressure tube, a mixture of 2,2-Difluoro-1-(1-methyl-1H-indol-3-yl)ethan-1-ol **3b** (0.2 mmol, 1.0 equiv), 5-methoxy-1H-indole (29.4 mg, 0.2 mmol, 1 equiv), 1,1'-Binaphthyl-2,2'-diyl hydrogenphosphate (6.9mg, 0.02 mmol, 0.1 equiv) in CH<sub>2</sub>Cl<sub>2</sub> (1 ml) was stirred at room temperature for 12 h. The reaction mixture was then diluted with ethyl acetate (10 ml) and washed with brine. The aqueous phase was extracted with Ethyl acetate. The organic layers were combined, washed with brine and dried over Na<sub>2</sub>SO<sub>4</sub>. The solvent was removed in vacuo, and the residue was purified by column chromatography (PE/EA= 4/1) to afford the desired 58.3 mg of product **7**, yield 86%.

### 3-(2,2-difluoro-1-(1-methyl-1H-indol-3-yl)ethyl)-5-methoxy-1H-indole (12)

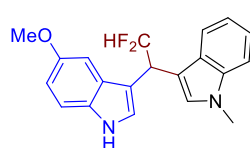

According to the above procedure and provide the title compound as a white solid (58.3 mg, 86%). TLC (PE: EA, 4:1 v/v): R<sub>f</sub> = 0.3; <sup>1</sup>H NMR (500 MHz, Chloroform-d) δ 7.99 (s, 1H), 7.64 (d, J = 8.0 Hz, 1H), 7.35 (d, J = 8.1 Hz, 1H), 7.27 (t, J = 8.1 Hz, 2H), 7.16 – 7.12 (m, 2H), 7.07 (d, J = 1.8 Hz, 1H), 7.05 (s, 1H), 6.90 (dd, J = 8.8, 2.1 Hz, 1H), 6.39 (td, J = 56.7, 3.3 Hz, 1H), 5.01 (td, J = 16.2, 3.1 Hz, 1H), 3.83 (s, 3H), 3.76 (s, 3H). <sup>13</sup>C NMR (126 MHz, Chloroform-d) δ 154.1 , 137.0 , 131.3 , 128.1 , 127.6 , 124.1 , 121.8 , 119.4 , 119.2 , 116.3 (t, J = 245.1 Hz), 112.4 , 111.9 , 111.7 (t, J = 3.6 Hz), 110.1 (t, J = 3.7 Hz), 109.4 , 101.2 , 55.9 , 38.6 (t, J = 21.9 Hz), 32.8 . <sup>19</sup>F NMR (471 MHz, Chloroform-d) δ -117.54 (dd, J = 56.7, 16.4 Hz). **HRMS (ESI)**: calcd for C<sub>20</sub>H<sub>18</sub>F<sub>2</sub>N<sub>2</sub>ONa [M + Na]<sup>+</sup>: 363.1279, found:363.1266.

## 5.6 Compound 13

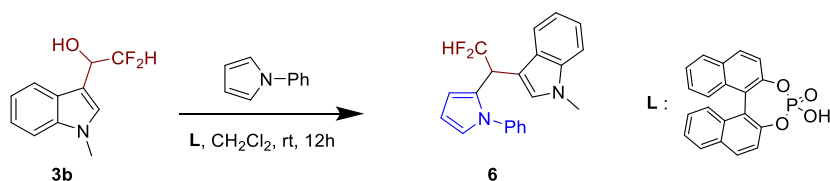

In an oven-dried Pressure tube, a mixture of 2,2-Difluoro-1-(1-methyl-1H-indol-3-yl)ethan-1-ol **3b** (0.2 mmol, 1.0 equiv), 1-phenyl-1H-pyrrole (28.6 mg, 0.2 mmol, 1 equiv), 1,1'-Binaphthyl-2,2'-diyl hydrogenphosphate (6.9mg, 0.02

mmol, 0.1 equiv) in CH<sub>2</sub>Cl<sub>2</sub> (1 ml) was stirred at room temperature for 12 h. The reaction mixture was then diluted with ethyl acetate (10 ml) and washed with brine. The aqueous phase was extracted with Ethyl acetate. The organic layers were combined, washed with brine and dried over Na<sub>2</sub>SO<sub>4</sub>. The solvent was removed in vacuo, and the residue was purified by column chromatography (PE/EA= 8/1) to afford the desired 25 mg of product **6**, yield 37%.<sup>2</sup>

### 3-(2,2-difluoro-1-(1-phenyl-1H-pyrrol-2-yl)ethyl)-1-methyl-1H-indole (13)

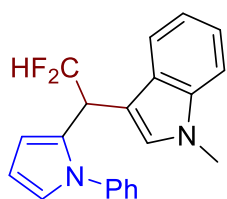

According to the above procedure and provide the title compound as a yellow oil (25 mg, 37%). TLC (PE: EA, 8:1 v/v): R<sub>f</sub>= 0.5; <sup>1</sup>H NMR (500 MHz, Chloroform-d) δ 7.38 – 7.31 (m, 5H), 7.29 – 7.24 (m, 1H), 7.21 – 7.17 (m, 2H), 7.11 (t, J = 7.5 Hz, 1H), 7.00 (s, 1H), 6.86 (dd, J = 2.6, 1.8 Hz, 1H), 6.53 (s, 1H), 6.38 (t, J = 3.2 Hz, 1H), 6.15 (td, J = 56.7, 4.0 Hz, 1H), 4.66 (td, J = 15.1, 4.0 Hz, 1H), 3.77 (s, 3H). <sup>13</sup>C NMR (125 MHz, Chloroform-d) δ 139.6 , 137.0 , 129.2 , 129.0 , 128.9 (t, J = 4.3 Hz), 127.6 , 127.1 , 126.5 , 122.3 , 121.8 , 119.3 , 119.0 , 116.6 (t, J = 245.4 Hz), 109.6 (t, J = 3.2 Hz), 109.3 , 108.6 , 108.5 , 38.8 (t, J = 22.6 Hz), 32.9 . <sup>19</sup>F NMR (470 MHz, Chloroform-d) δ -115.78 – -119.11 (m). **HRMS (ESI):** calcd for C<sub>21</sub>H<sub>19</sub>F<sub>2</sub>N<sub>2</sub> [M + H]<sup>+</sup>: 337.1510, found:337.1503.

## 6 References

1. S. Kaneko, T. Yamazaki, T. Kitazume, *J. Org. Chem.* **1993**, *58*, 2302-2312.
2. X. Cai, J. Xu, X. Cui, J. Qu, W. Sun, J. Hu, S. Zhao, W.-H. Chen, H. Li, J.-Q. Wu, *Org. Chem. Front.*, **2022**, *9*, 6273–6280.

## 7 $^1\text{H}$ , $^{13}\text{C}$ and $^{19}\text{F}$ NMR Spectra of Synthesized Compounds

### $^1\text{H}$ NMR (500 MHz, Chloroform-*d*) spectra of **3a**

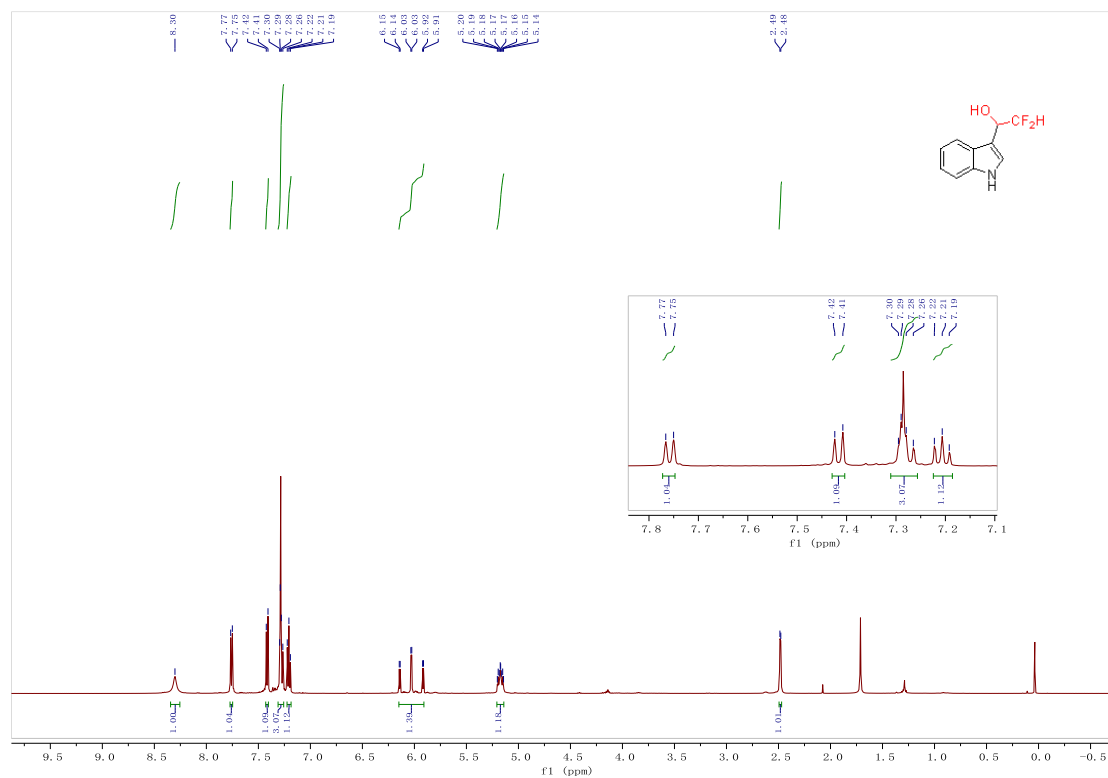

### $^{13}\text{C}$ NMR (125 MHz, Chloroform-*d*) spectra of **3a**

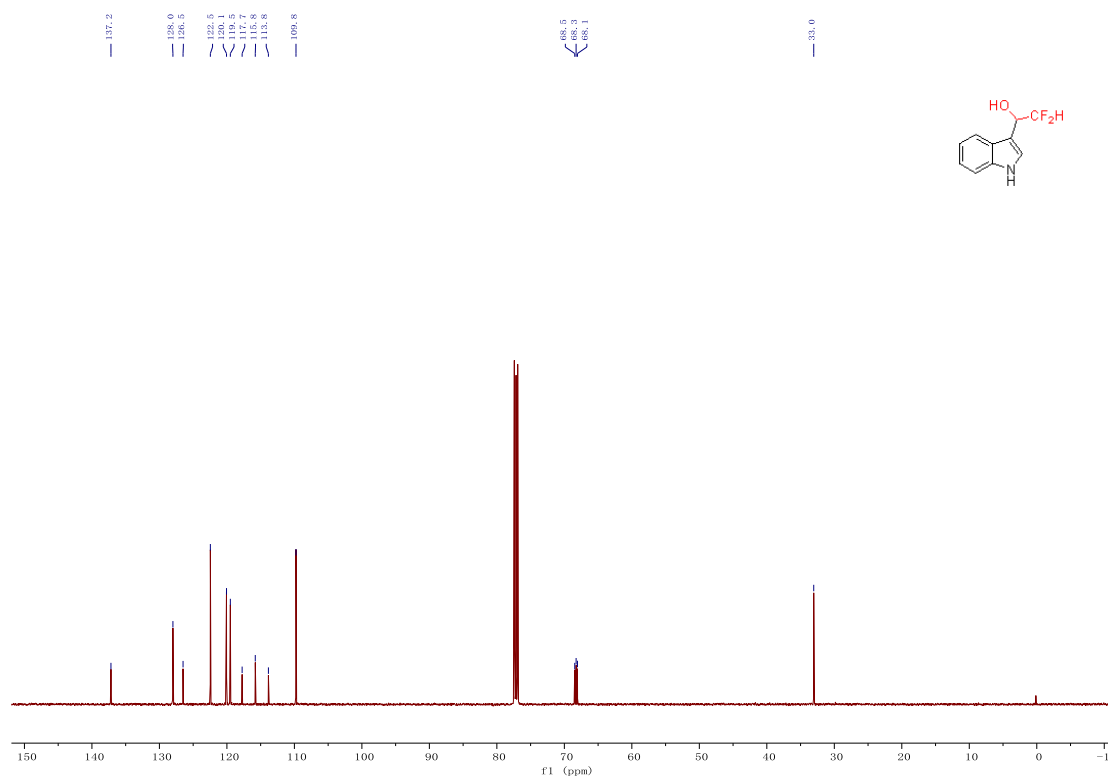

### $^{19}\text{F}$ NMR (470 MHz, Chloroform-*d*) spectra of **3a**

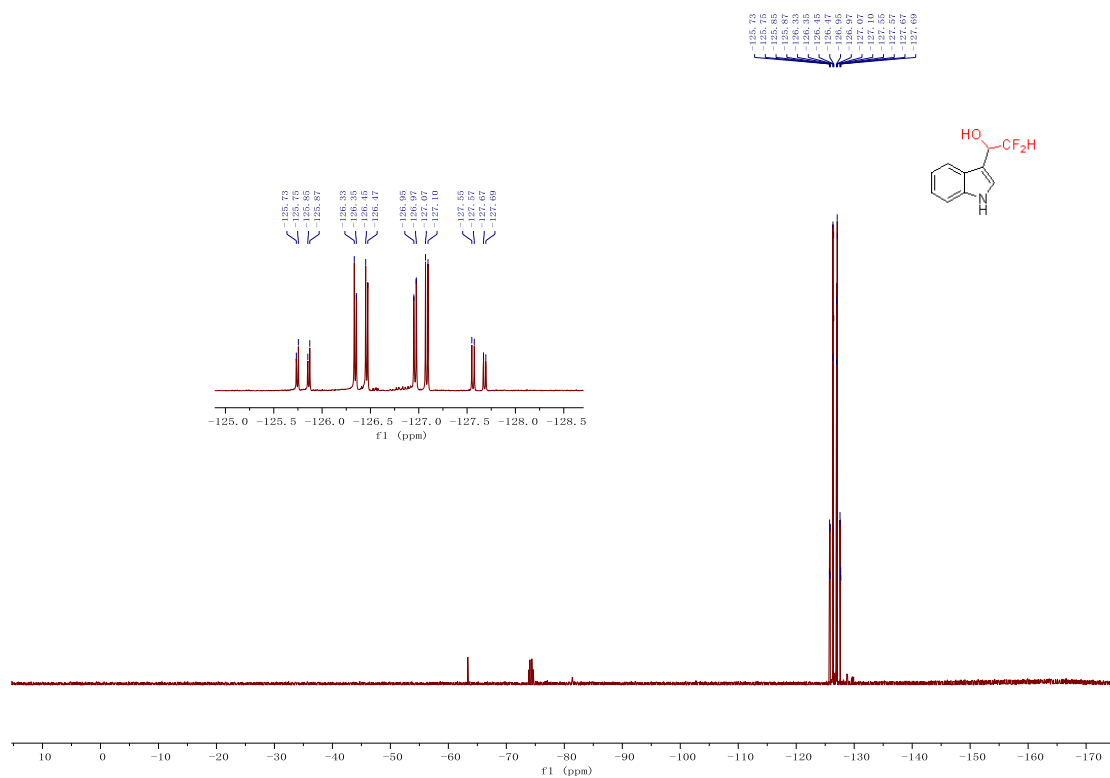

<sup>1</sup>H NMR (500 MHz, Chloroform-*d*) spectra of **3b**

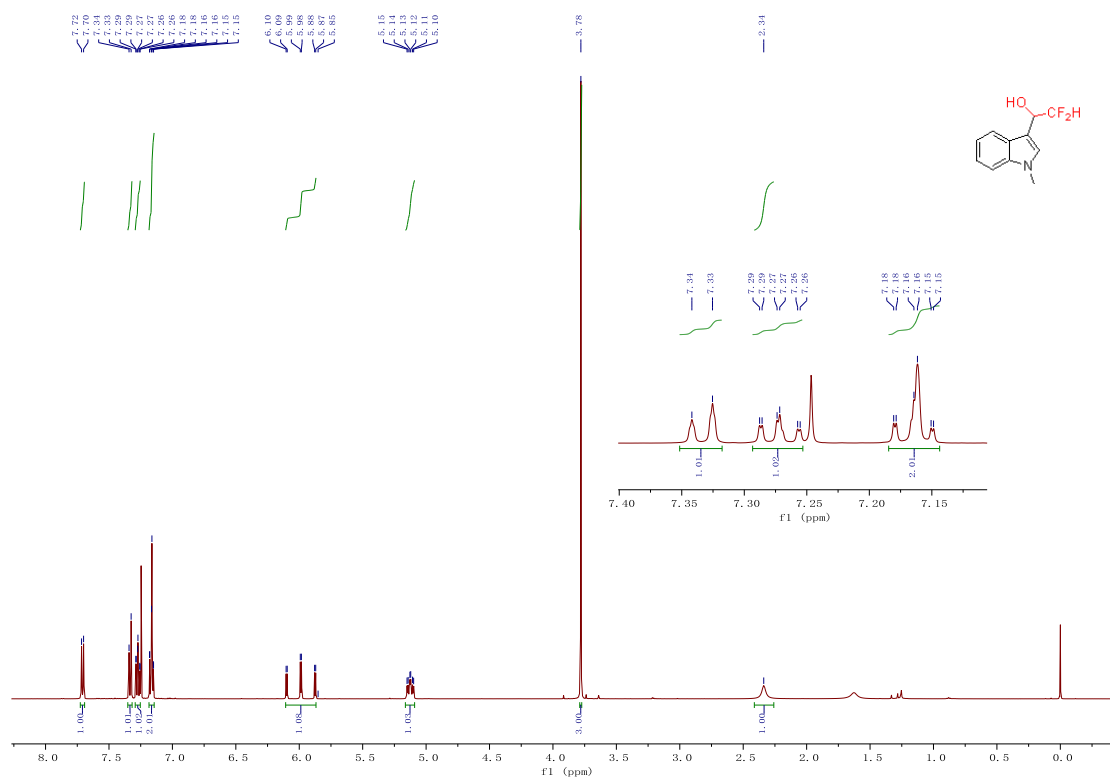

<sup>13</sup>C NMR (125 MHz, Chloroform-*d*) spectra of **3b**

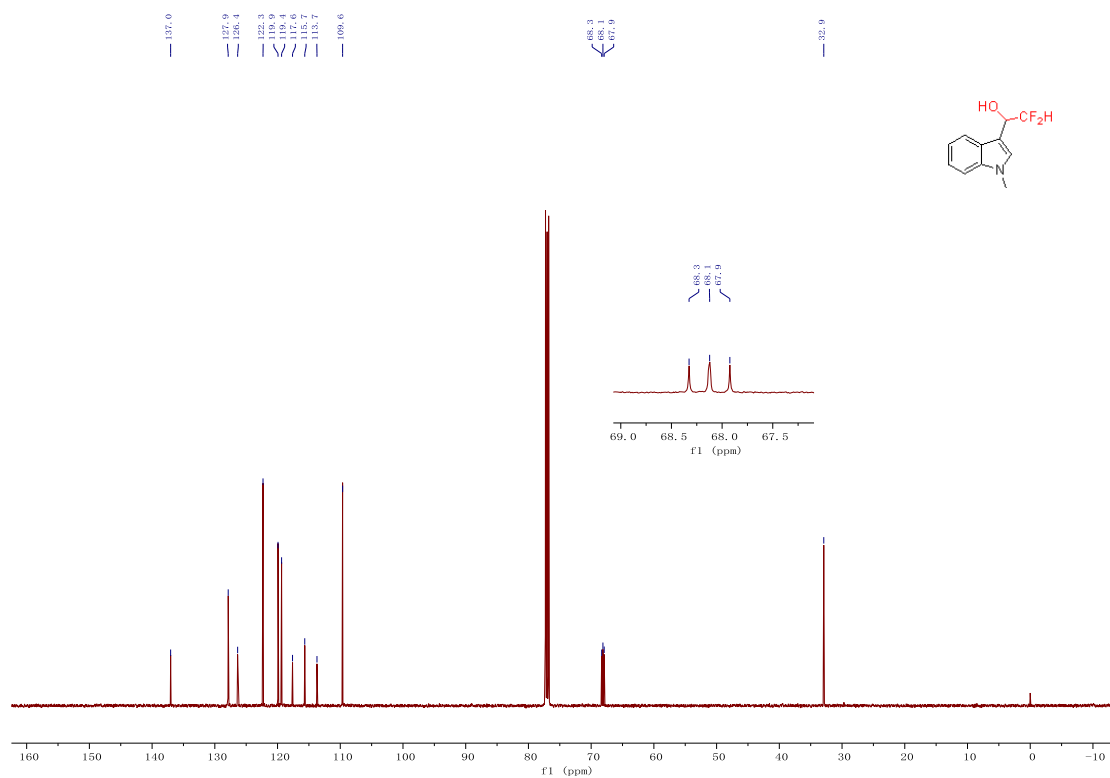

<sup>19</sup>F NMR (470 MHz, Chloroform-*d*) spectra of 3b

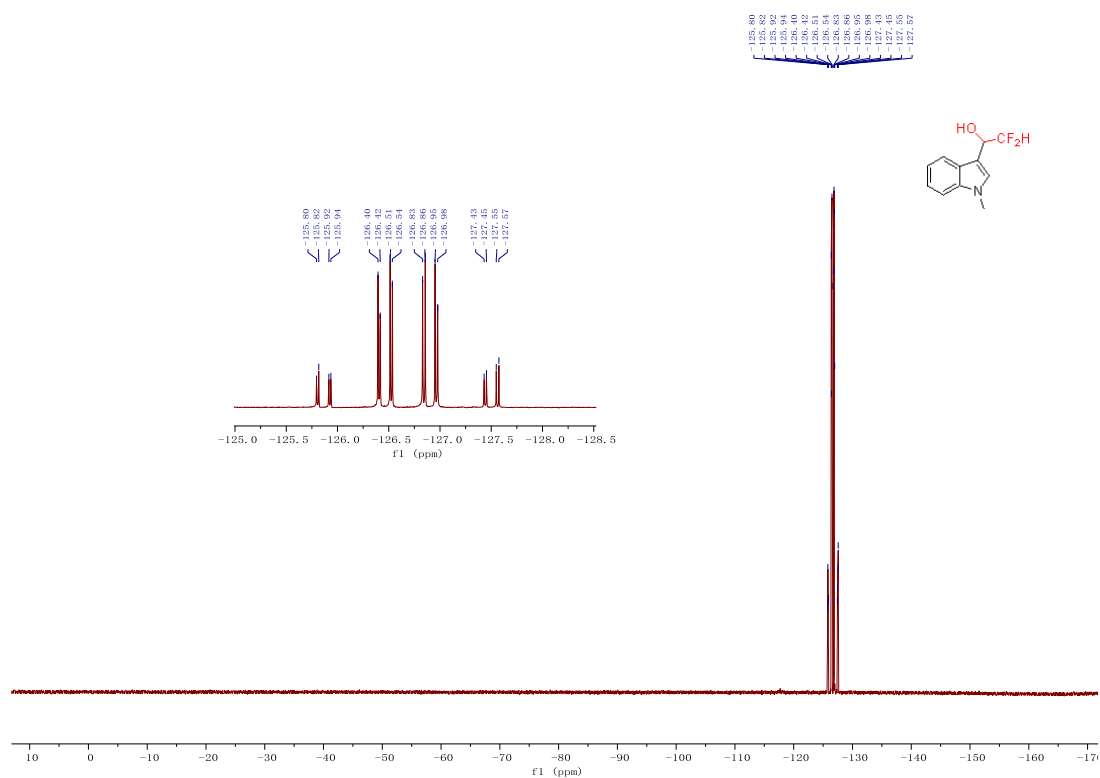

# <sup>1</sup>H NMR (600 MHz, Chloroform-*d*) spectra of **3c**

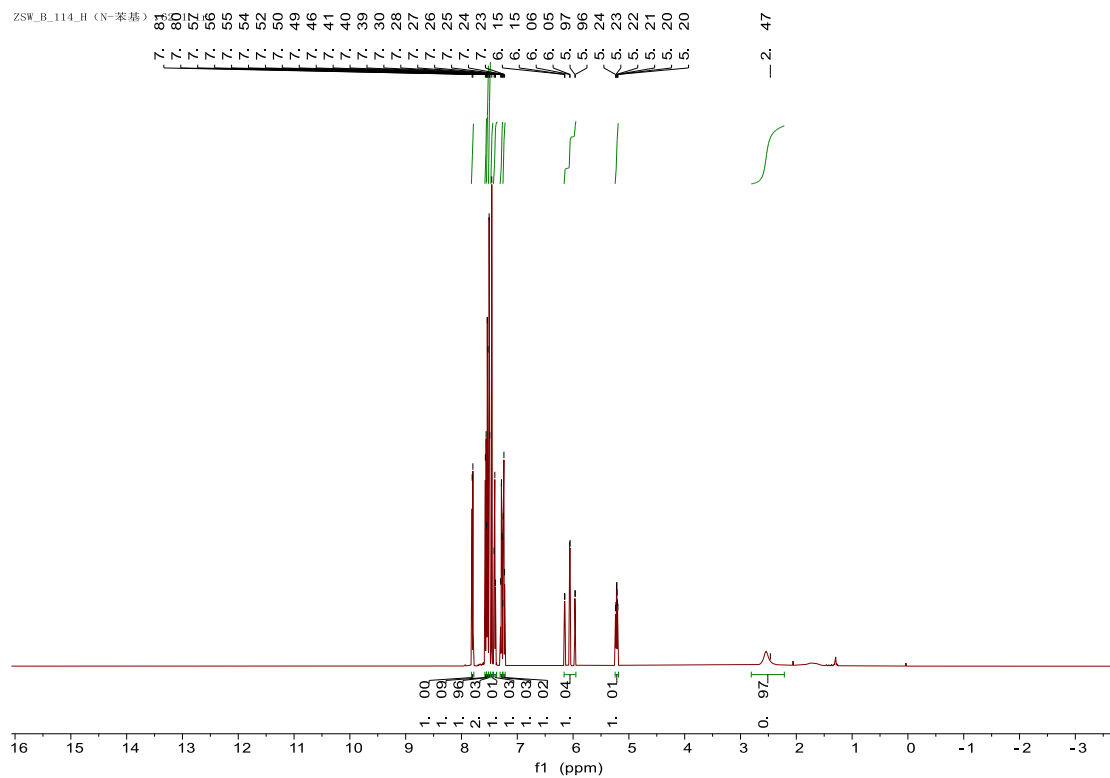

# <sup>13</sup>C NMR (151 MHz, Chloroform-*d*) spectra of **3c**

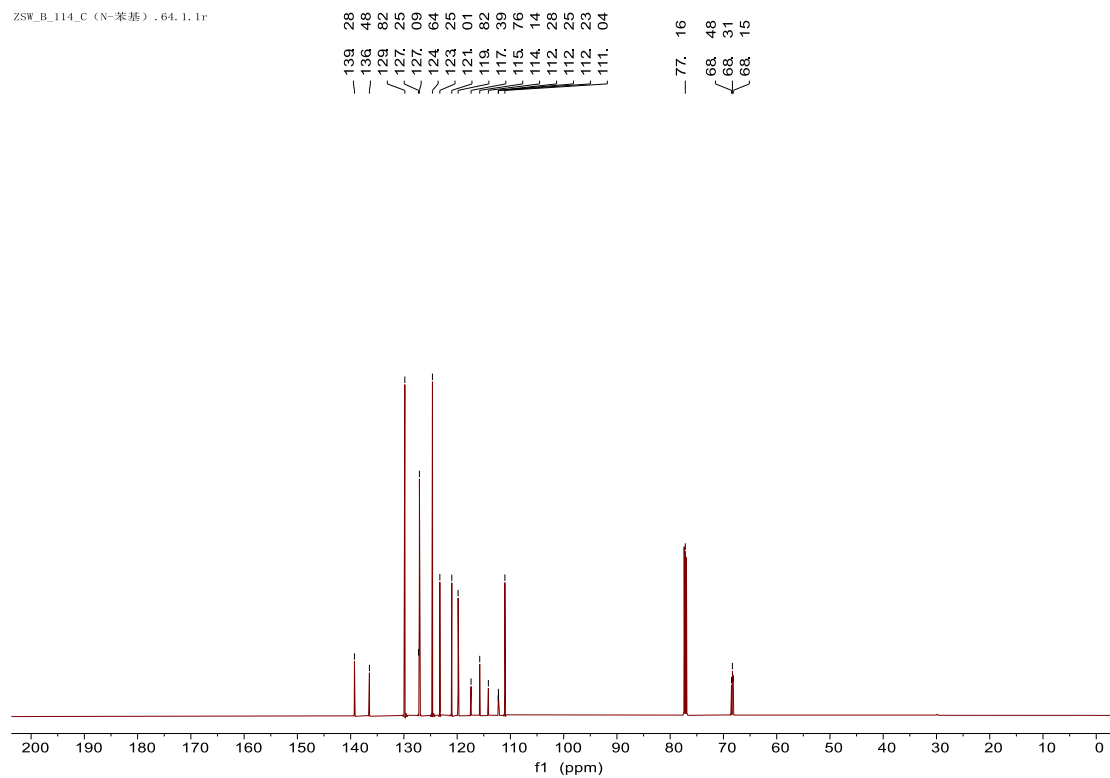



### $^{19}\text{F}$ NMR (470 MHz, Chloroform-*d*) spectra of **3c**

ZSW\_B\_114\_F (N-茶碱) . 10. 1. 1r

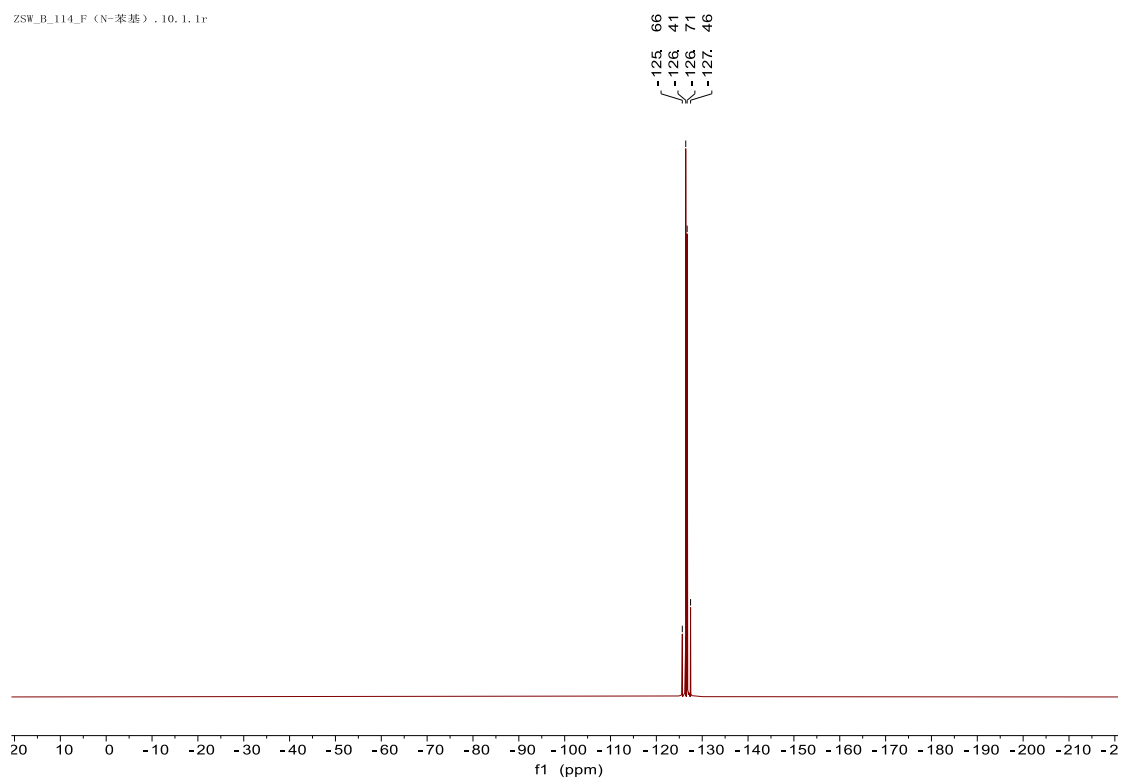

### $^1\text{H}$ NMR (600 MHz, Chloroform-*d*) spectra of **3d**

ZSW\_B\_112\_H (N-茶碱) . 10. 1. 1r

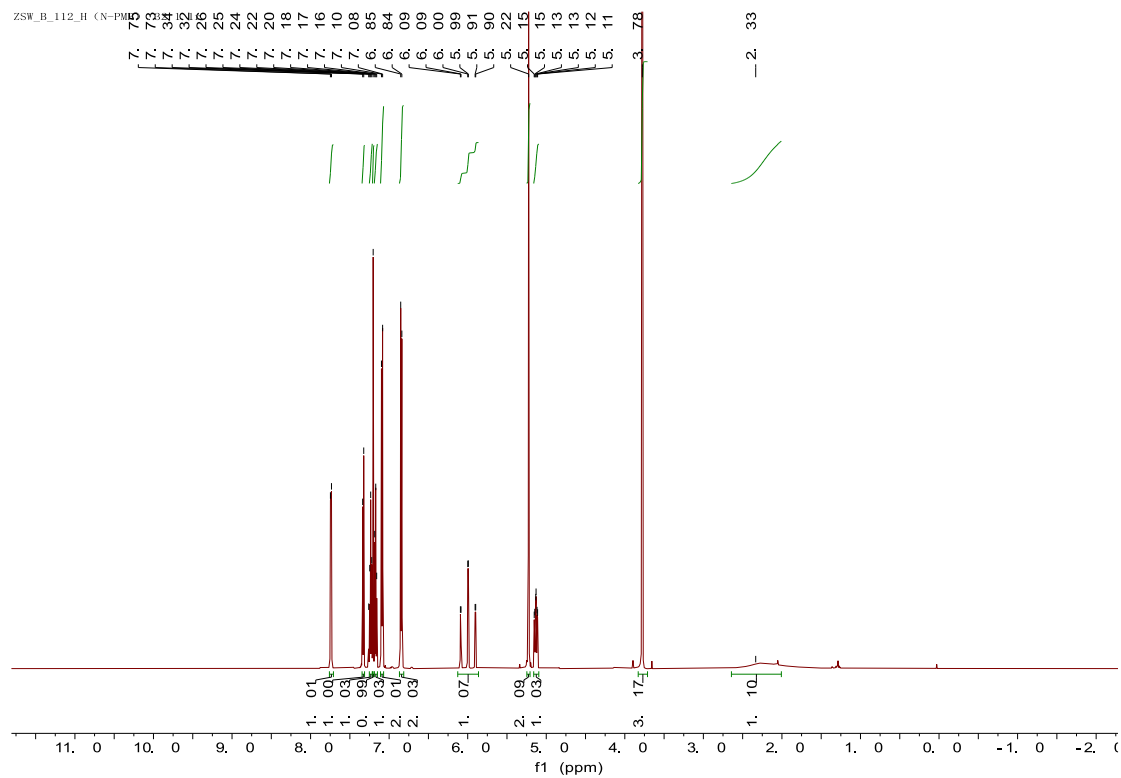

### $^{13}\text{C}$ NMR (151 MHz, Chloroform-*d*) spectra of **3d**

ZSW\_B\_112\_C (N-PMB) .33, 1, 1r

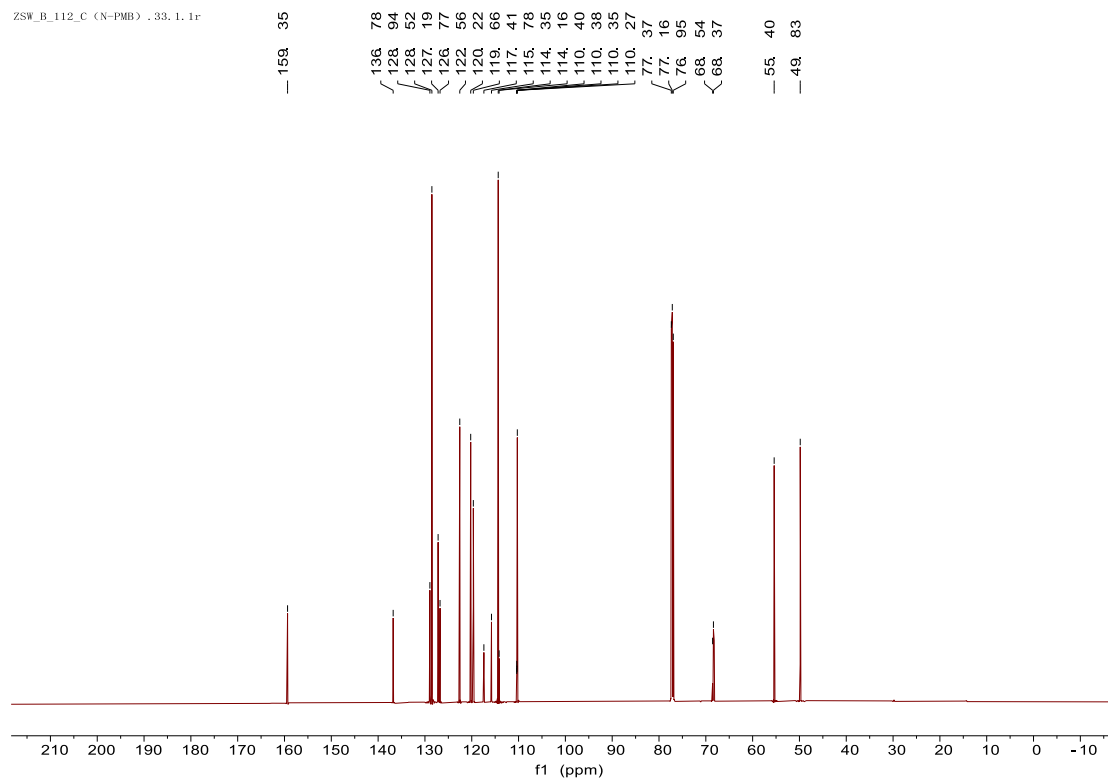

### <sup>19</sup>F NMR (470 MHz, Chloroform-*d*) spectra of **3d**

ZSW\_B\_112\_F (N-PMB) .10, 1, 1r

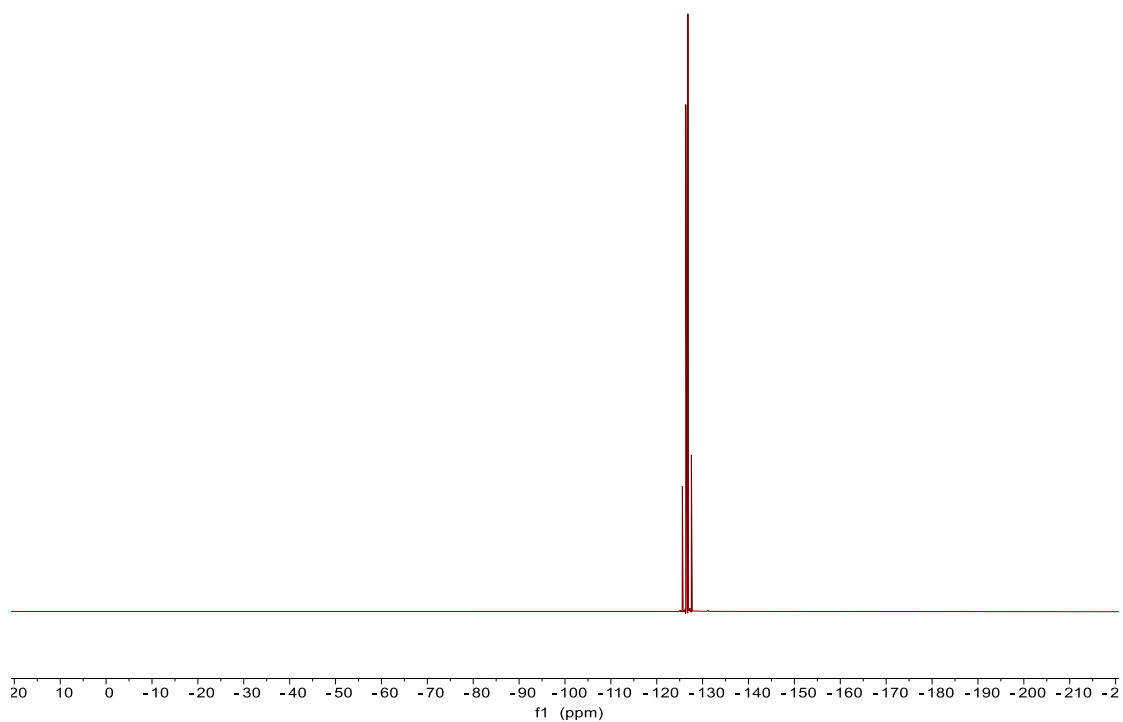

### <sup>1</sup>H NMR (500 MHz, Chloroform-*d*) spectra of **3e**

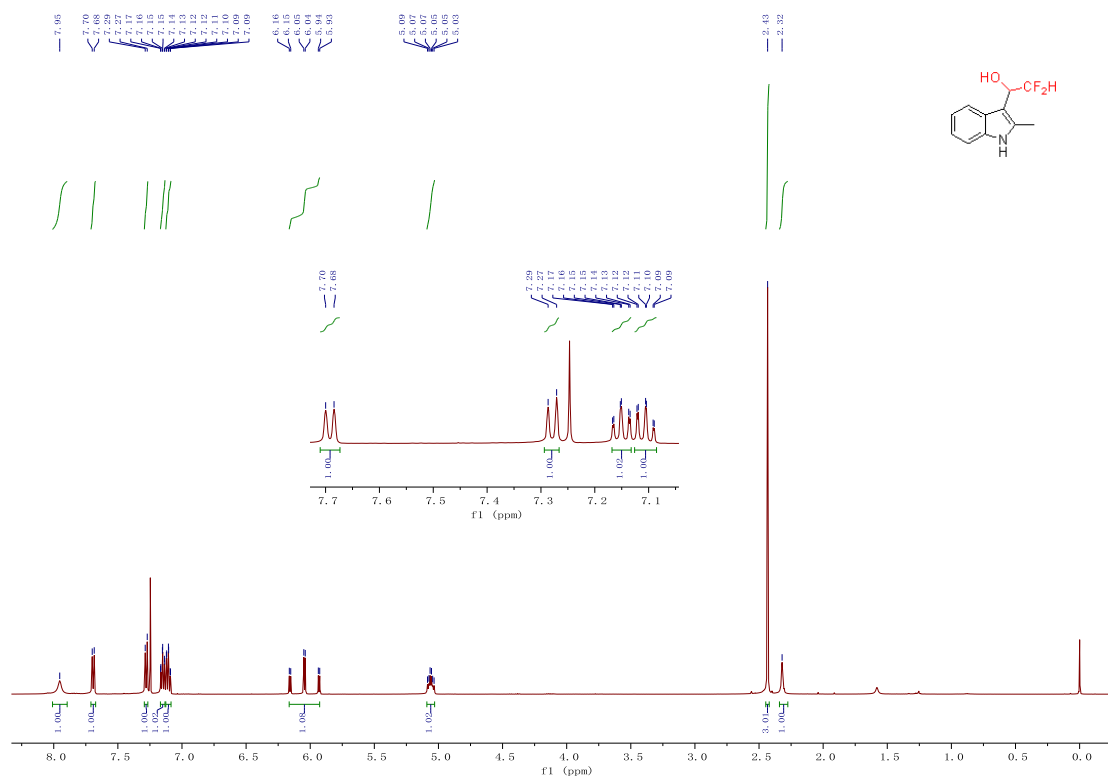

**<sup>13</sup>C NMR (125 MHz, Chloroform-*d*) spectra of 3e**

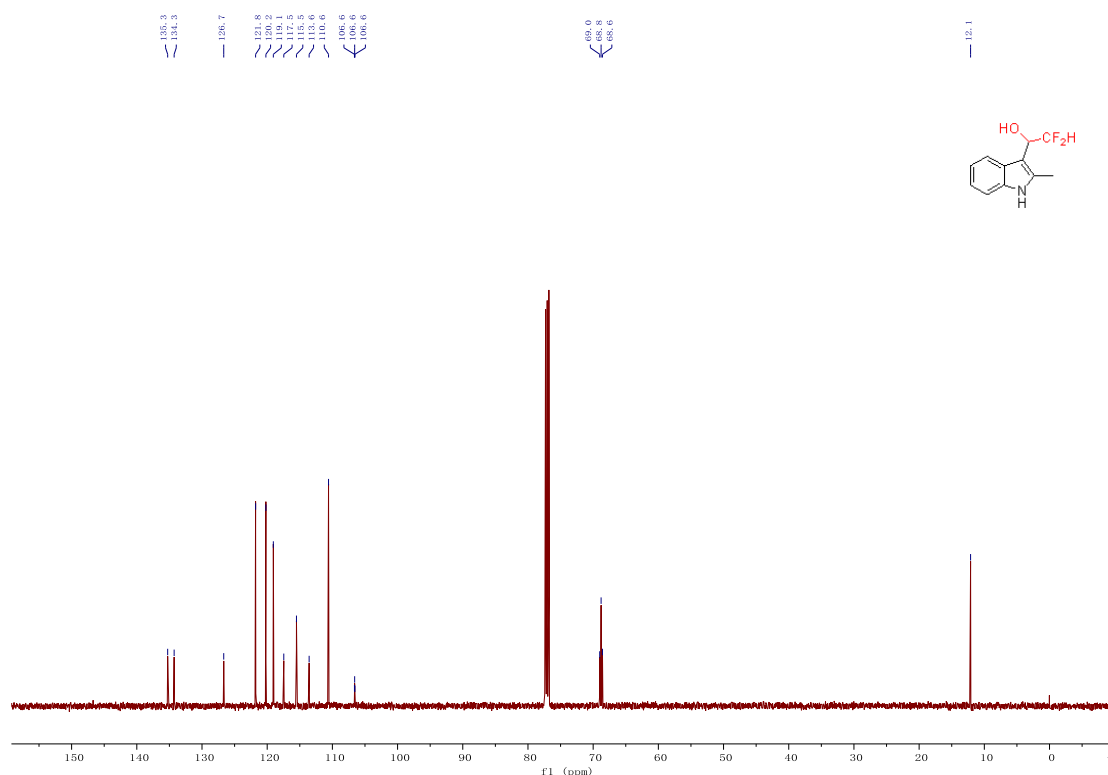

**<sup>19</sup>F NMR (470 MHz, Chloroform-*d*) spectra of 3e**

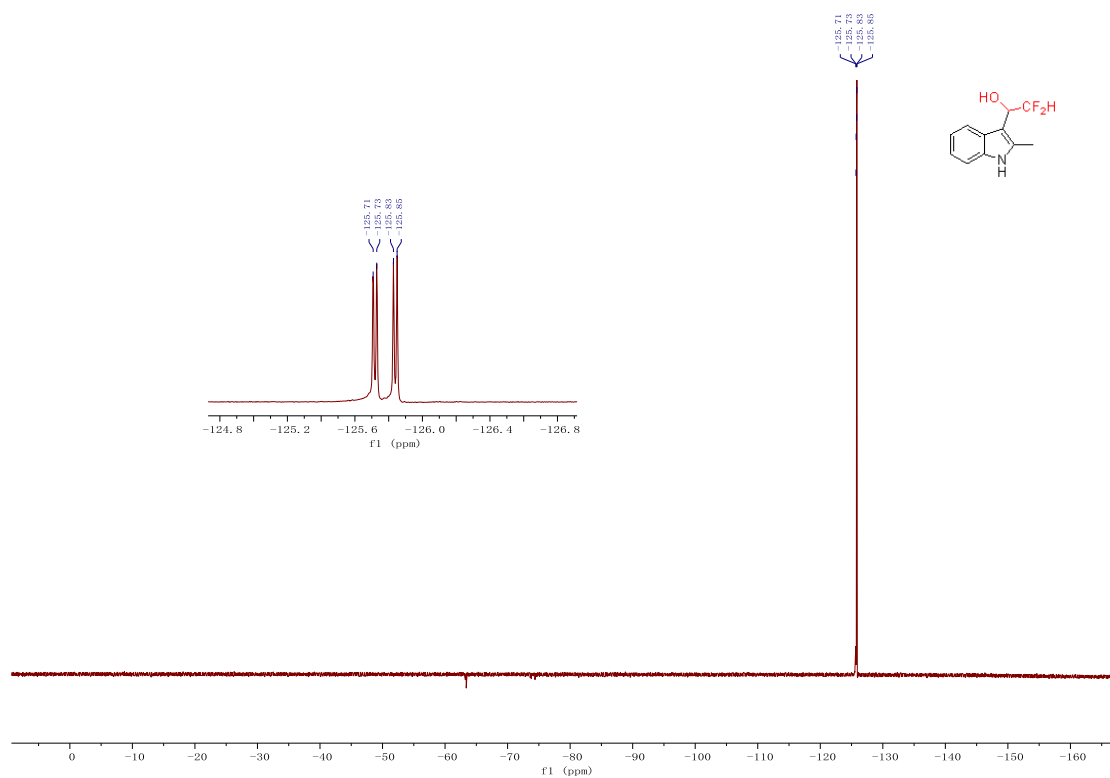

### <sup>1</sup>H NMR (500 MHz, Chloroform-*d*) spectra of **3f**

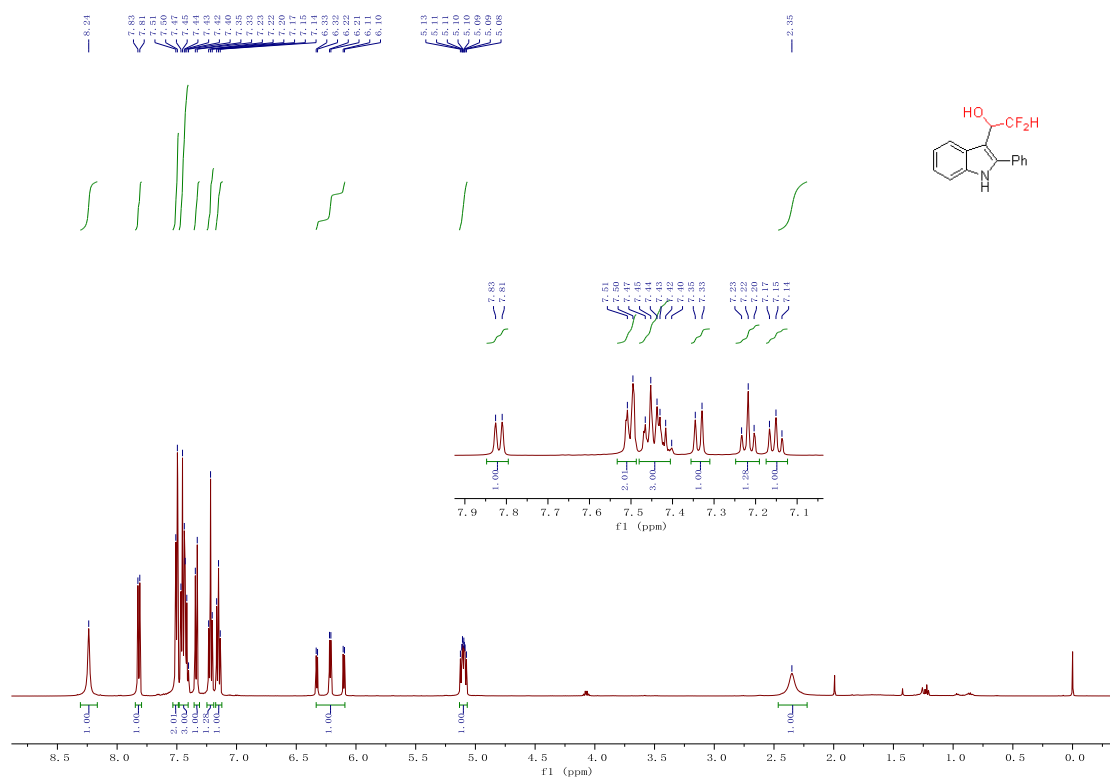

### <sup>13</sup>C NMR (125 MHz, Chloroform-*d*) spectra of **3f**

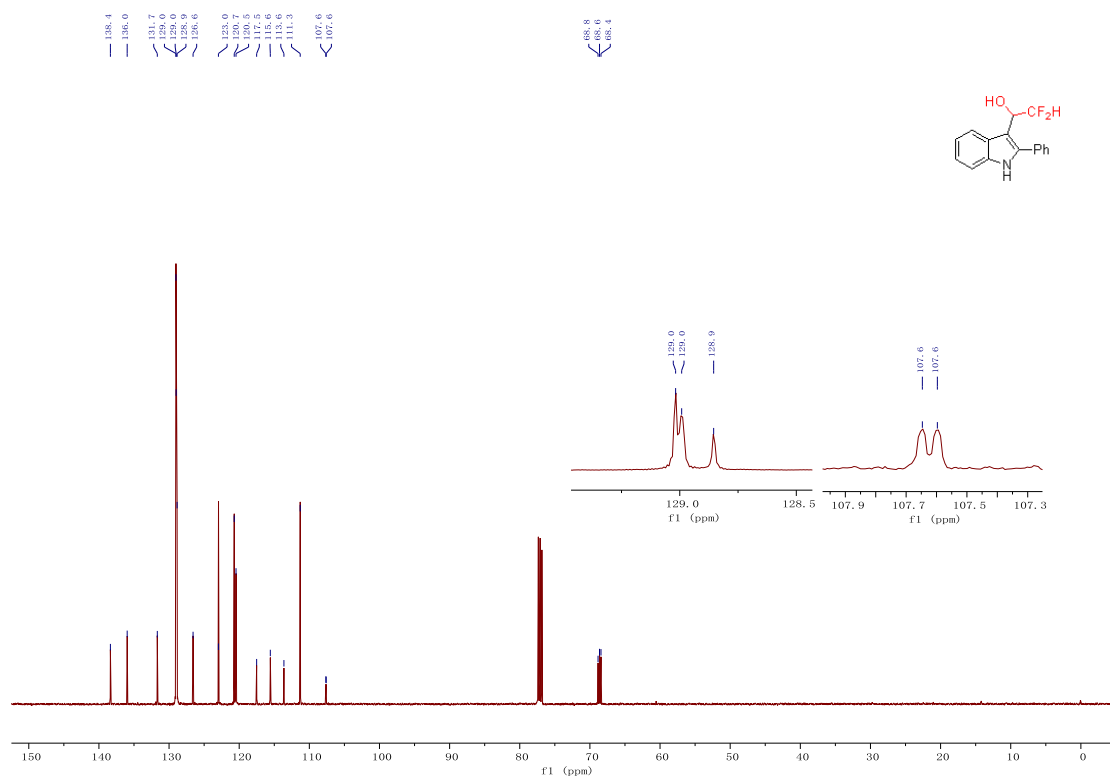

<sup>19</sup>F NMR (470 MHz, Chloroform-*d*) spectra of **3f**

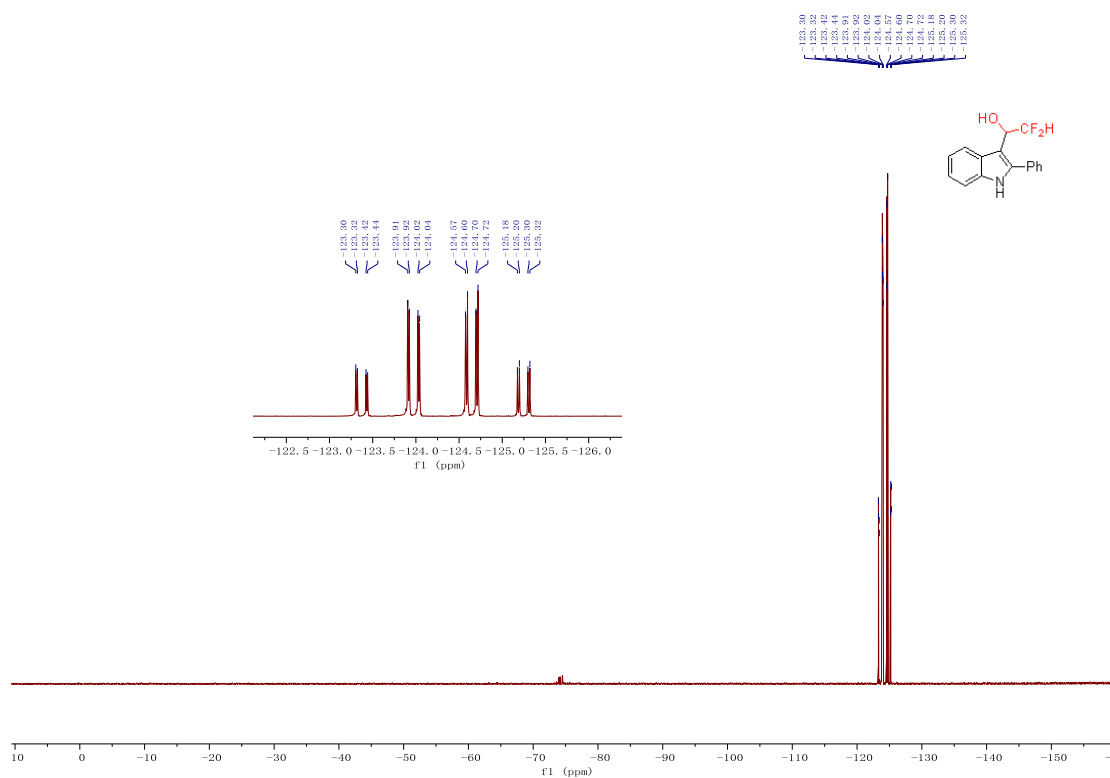

<sup>1</sup>H NMR (500 MHz, Chloroform-*d*) spectra of **3g**

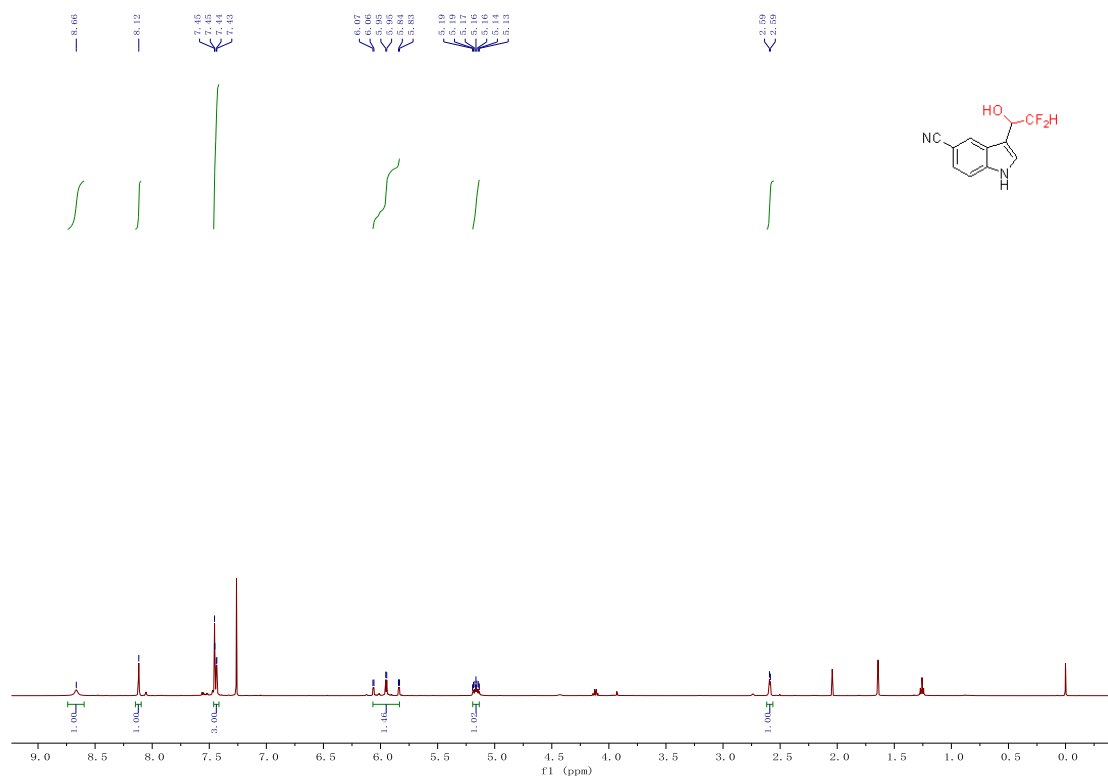

**<sup>13</sup>C NMR (125 MHz, Chloroform-*d*) spectra of 3g**

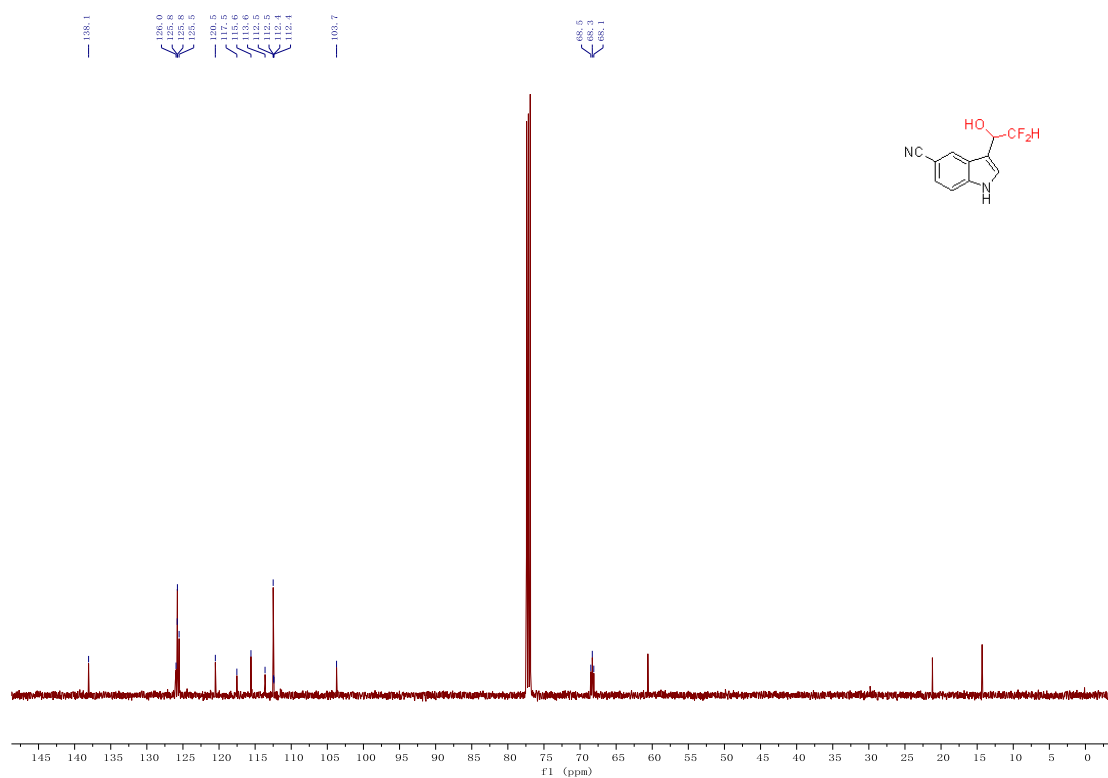

**<sup>19</sup>F NMR (470 MHz, Chloroform-*d*) spectra of 3g**

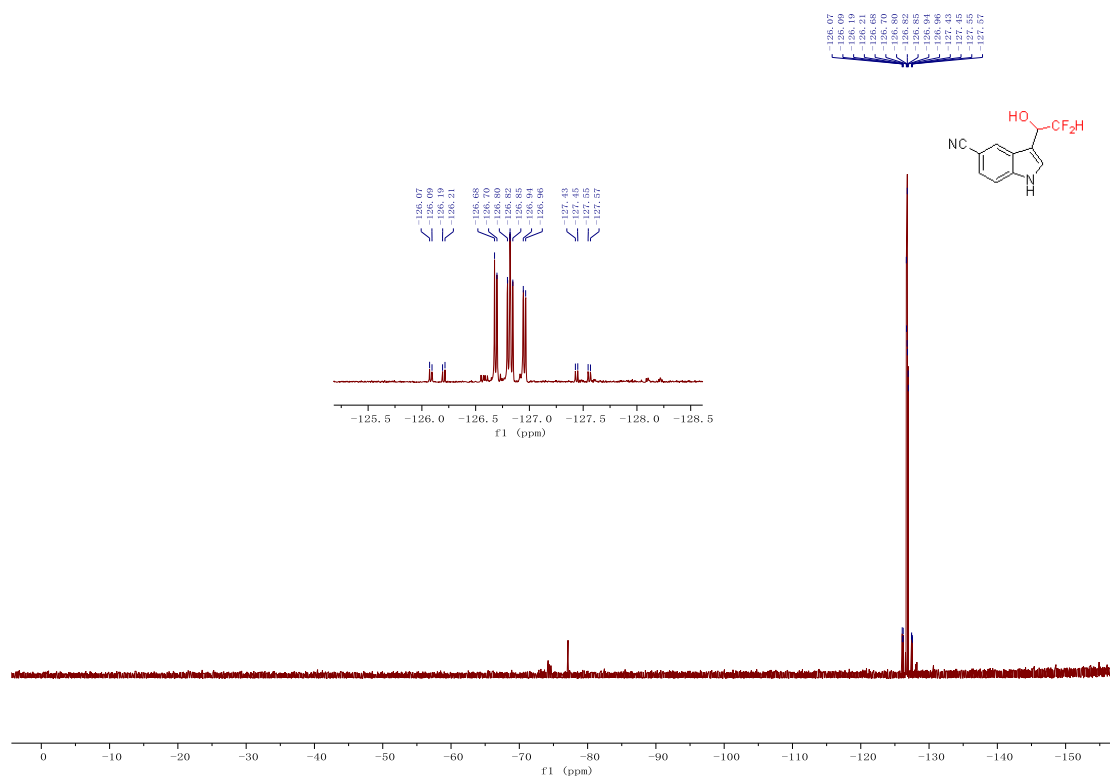

$^1\text{H}$  NMR (500 MHz,  $\text{DMSO-}d_6$ ) spectra of **3h**

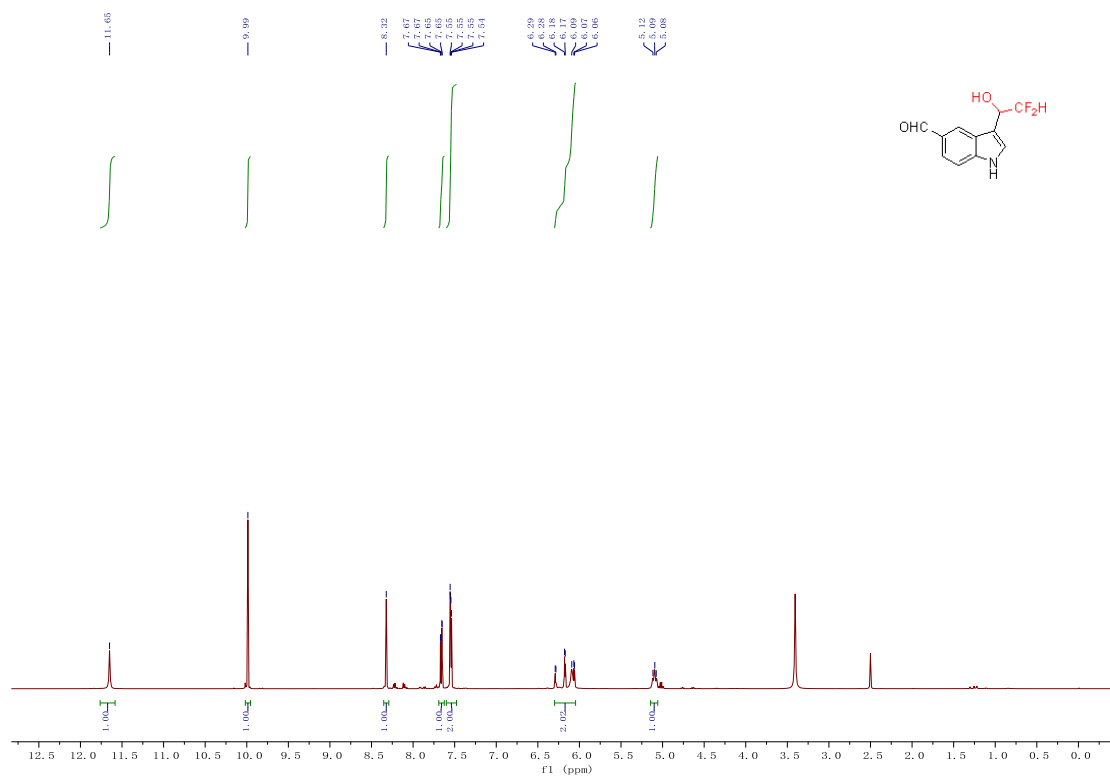

$^{13}\text{C}$  NMR (125 MHz,  $\text{DMSO-}d_6$ ) spectra of **3h**

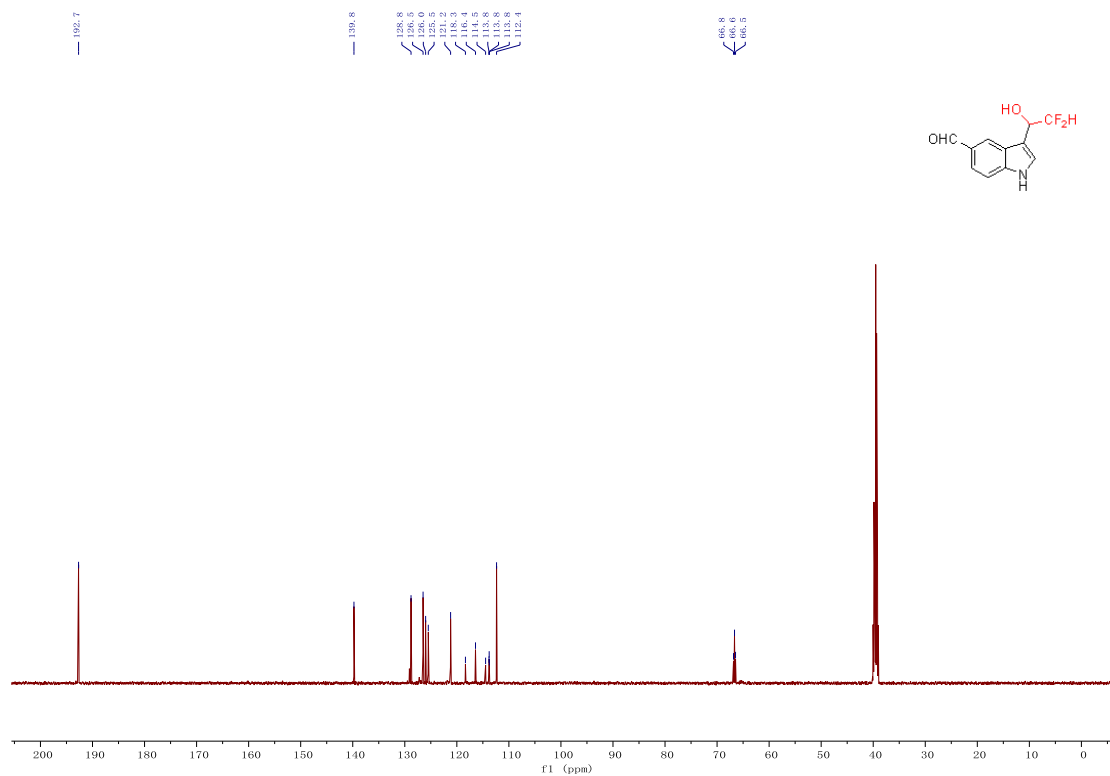

<sup>19</sup>F NMR (470 MHz, DMSO-*d*<sub>6</sub>) spectra of **3h**

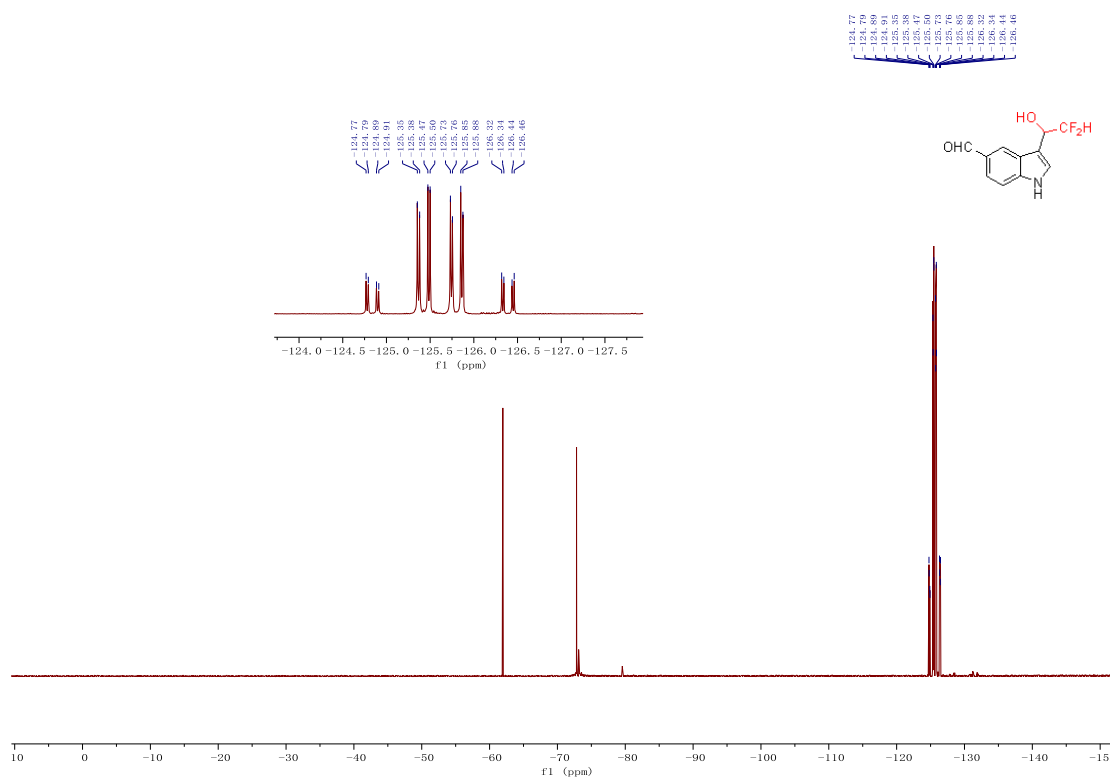

<sup>1</sup>H NMR (500 MHz, DMSO-*d*<sub>6</sub>) spectra of **3i**



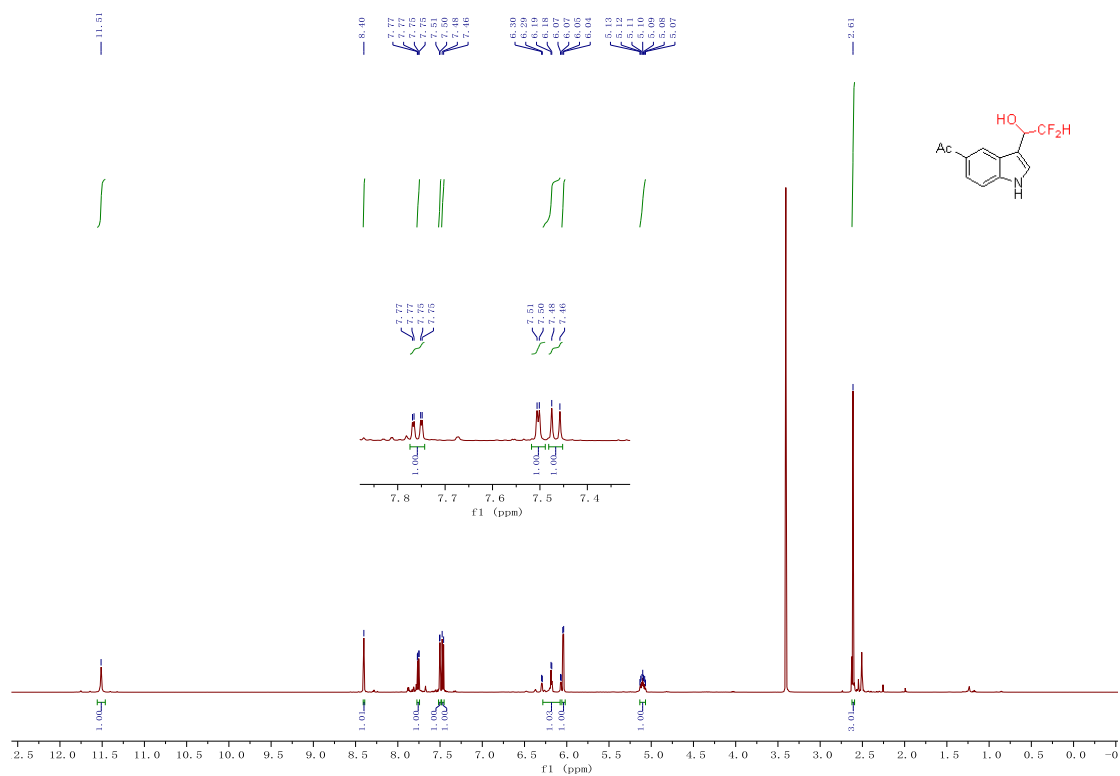

**<sup>13</sup>C NMR (125 MHz, DMSO-*d*<sub>6</sub>) spectra of **3i****

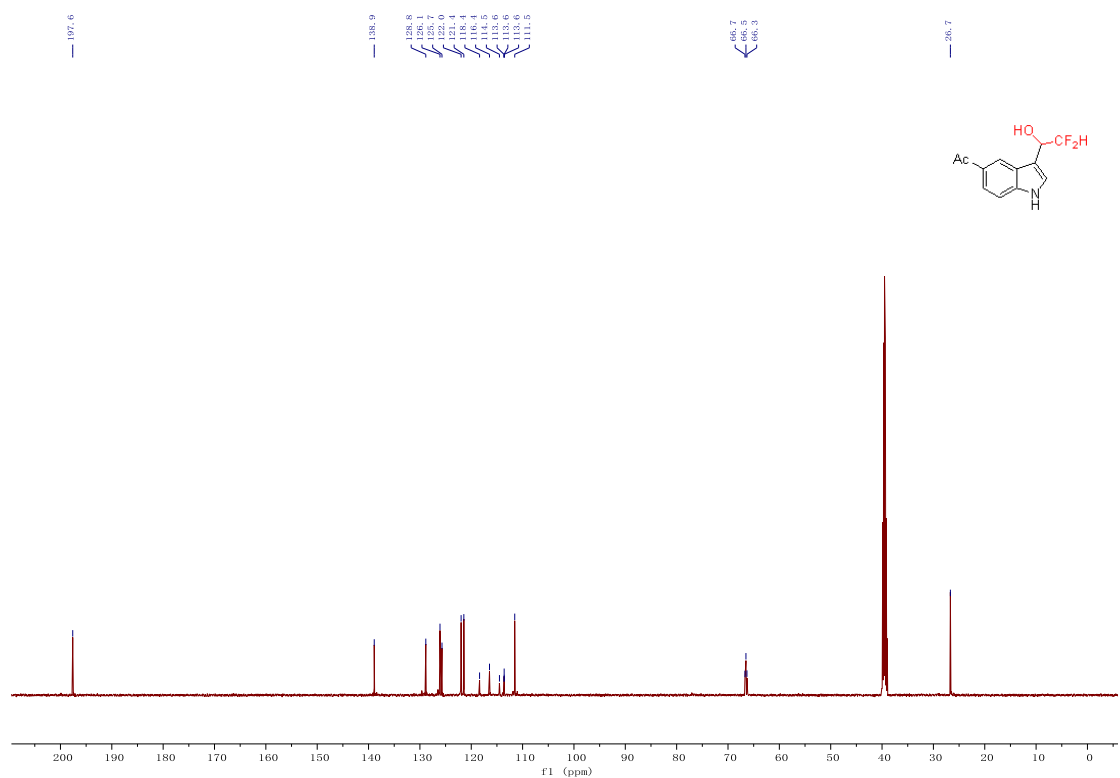

**<sup>19</sup>F NMR (470 MHz, DMSO-*d*<sub>6</sub>) spectra of **3i****

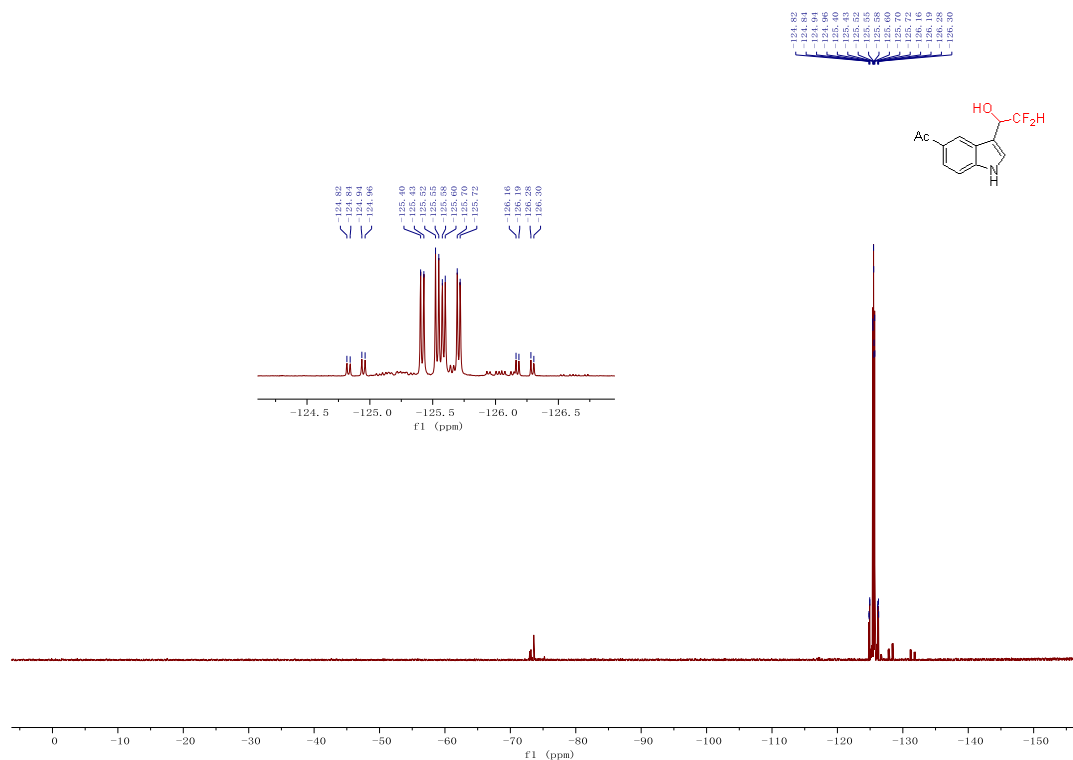

<sup>1</sup>H NMR (500 MHz, Chloroform-*d*) spectra of **3j**

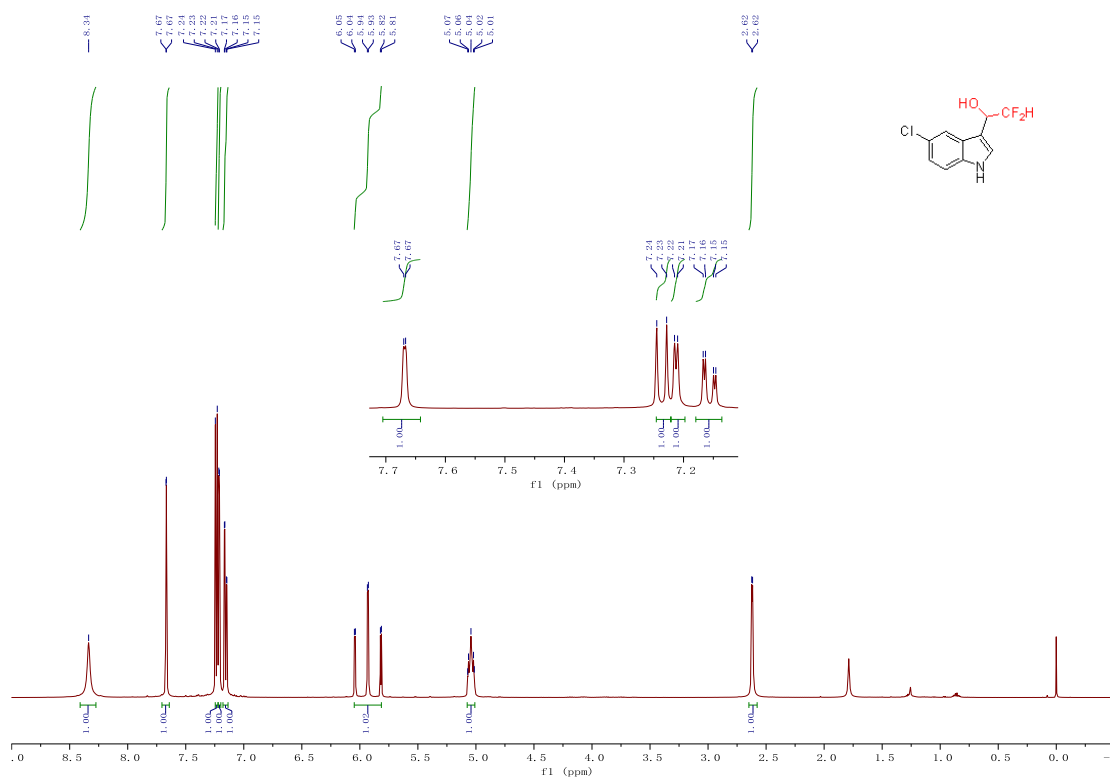

<sup>13</sup>C NMR (125 MHz, Chloroform-*d*) spectra of **3j**

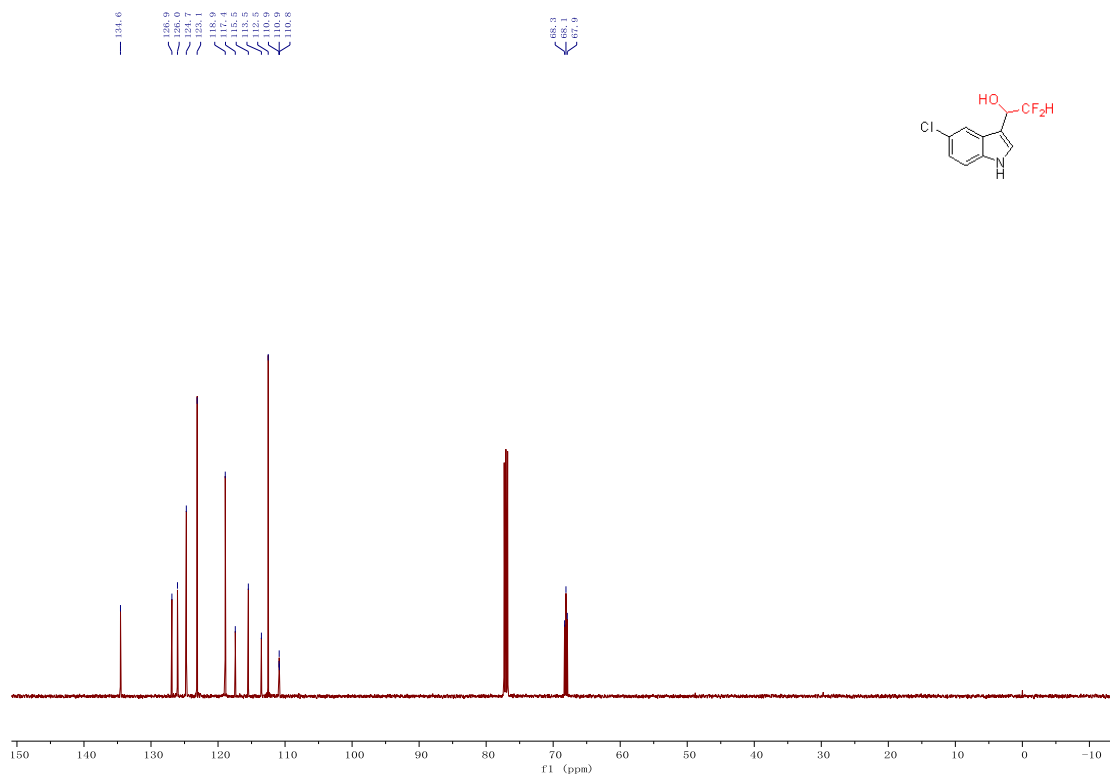

<sup>19</sup>F NMR (470 MHz, Chloroform-*d*) spectra of **3j**

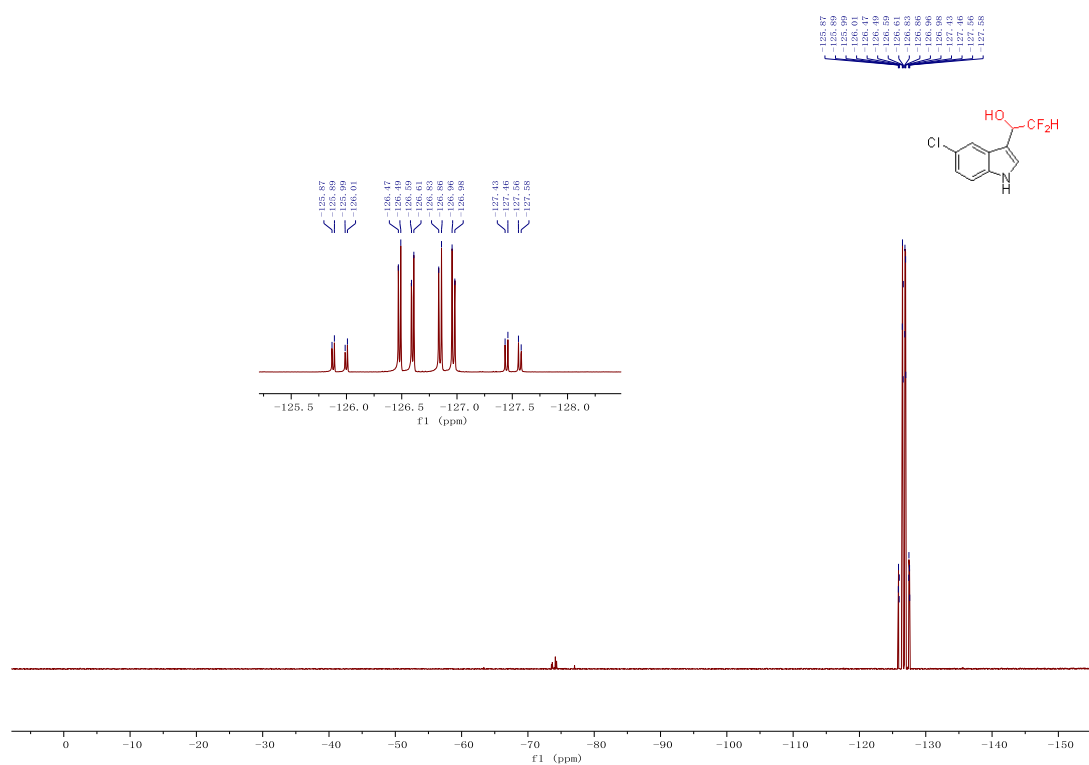

<sup>1</sup>H NMR (500 MHz, Chloroform-*d*) spectra of **3k**

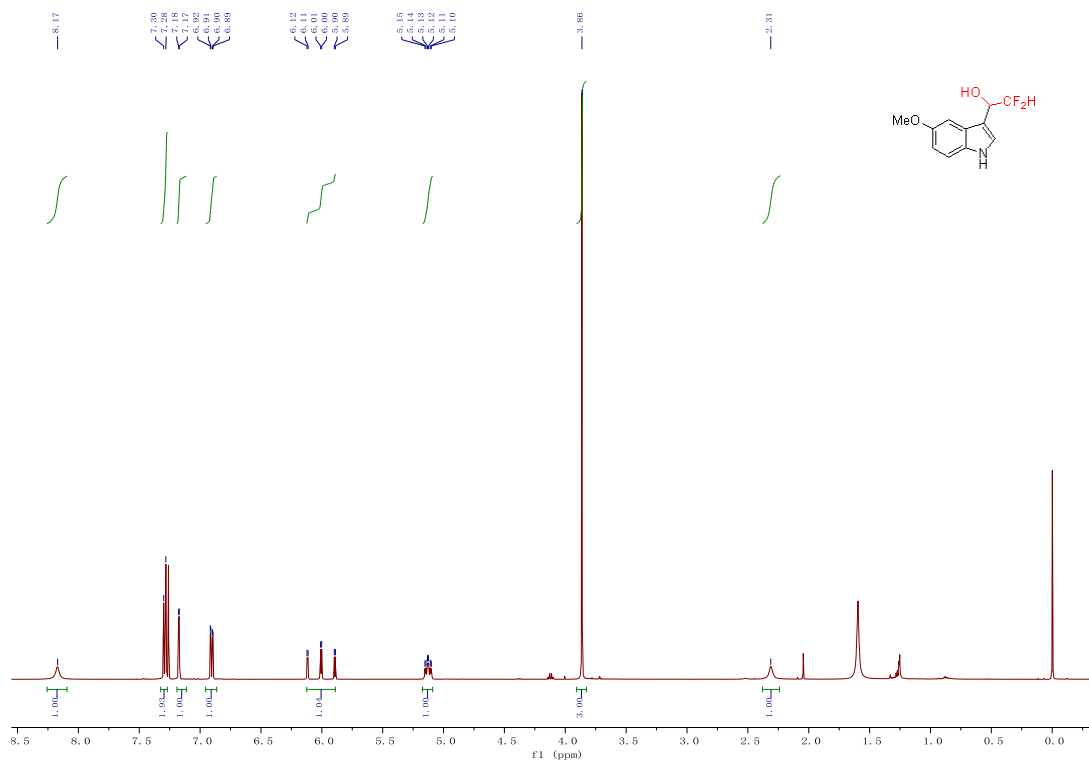

**<sup>13</sup>C NMR (125 MHz, Chloroform-*d*) spectra of **3k****

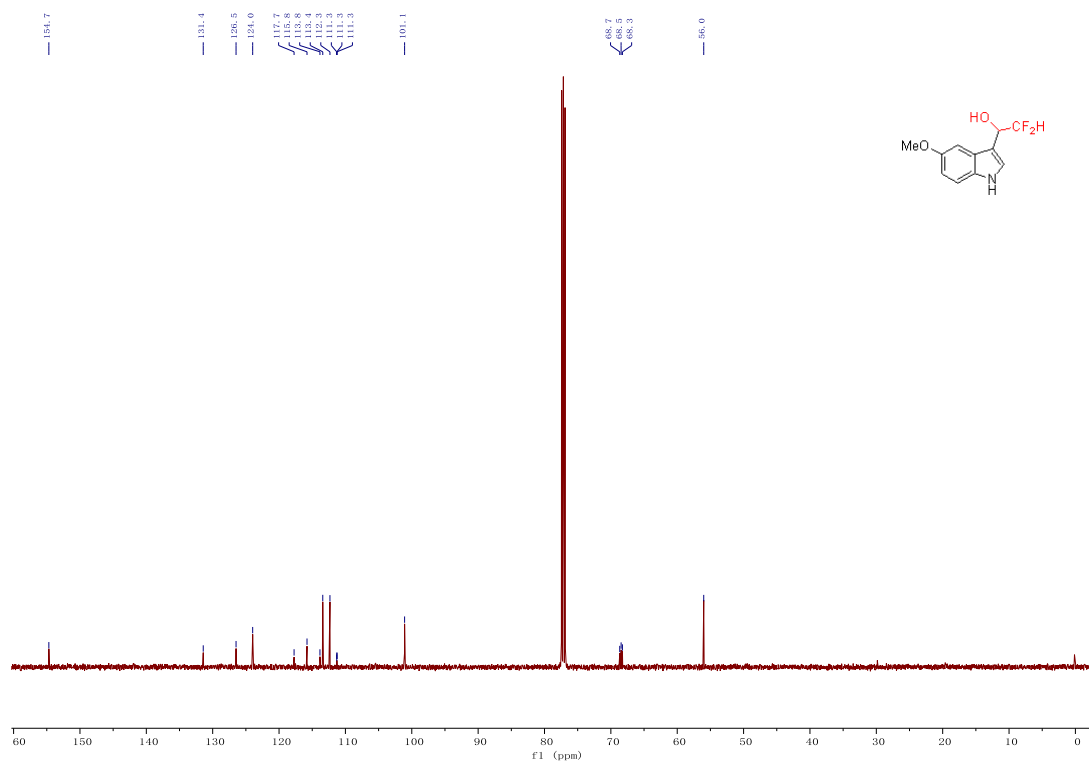

**<sup>19</sup>F NMR (470 MHz, Chloroform-*d*) spectra of **3k****

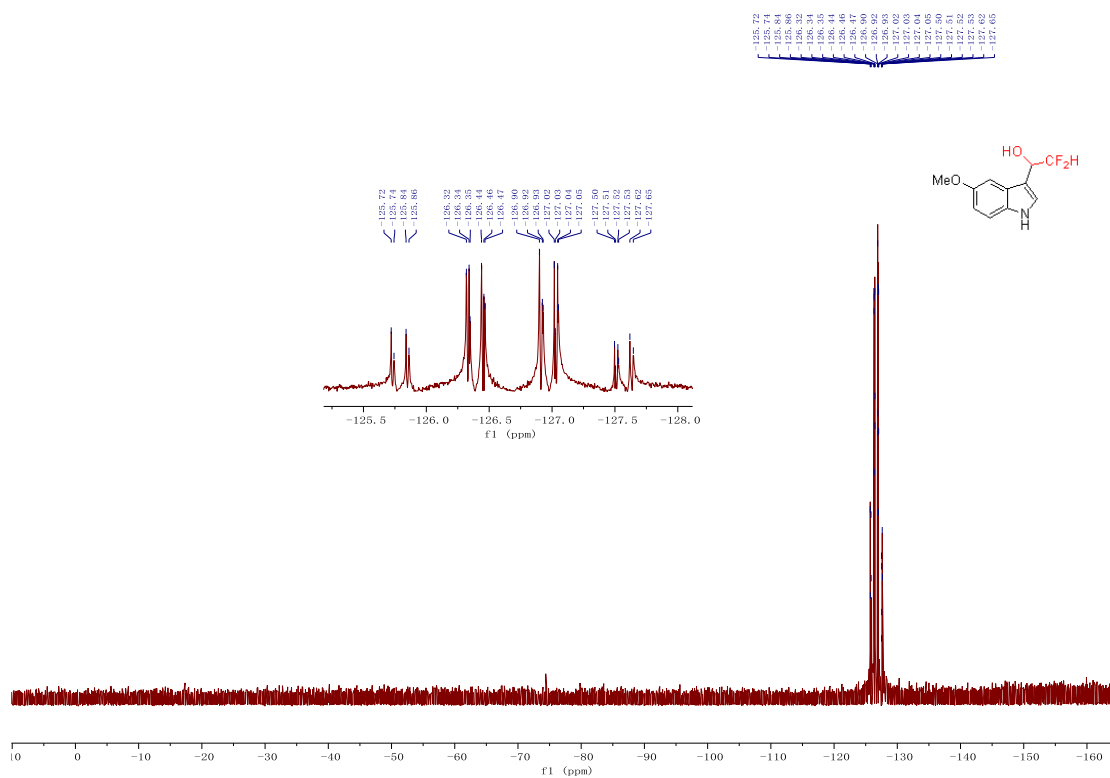

$^1\text{H}$  NMR (500 MHz, Chloroform-*d*) spectra of **31**

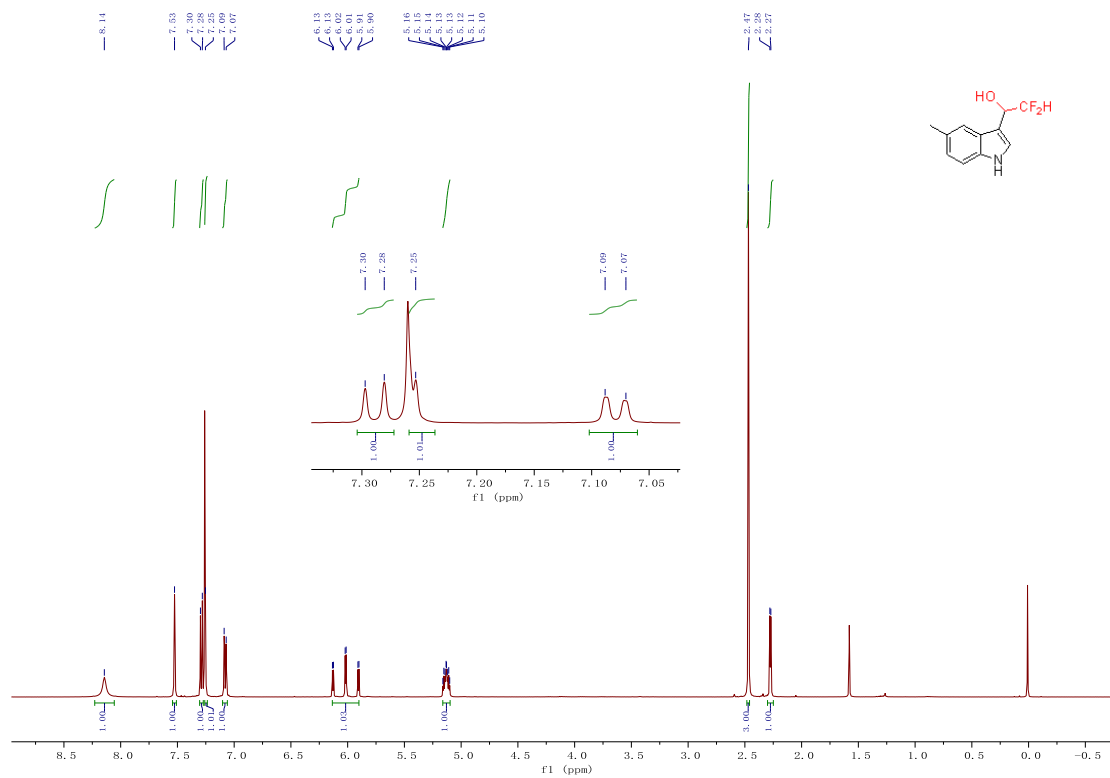

$^{13}\text{C}$  NMR (125 MHz, Chloroform-*d*) spectra of **31**

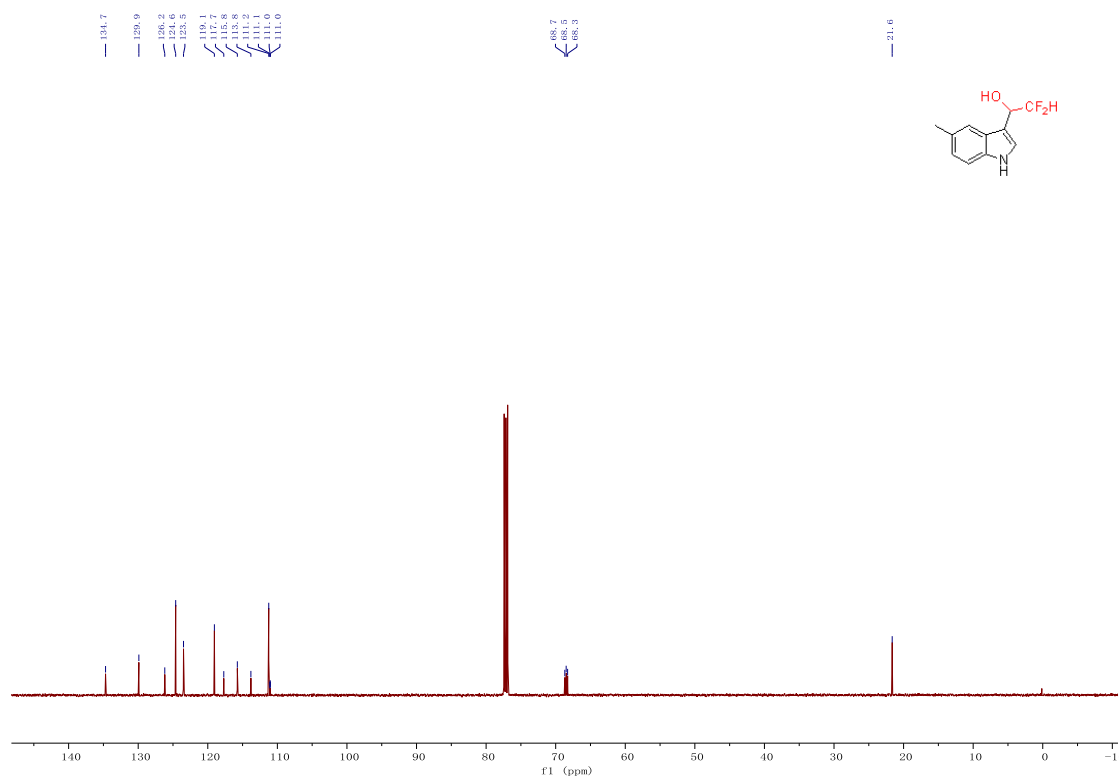

<sup>19</sup>F NMR (470 MHz, Chloroform-*d*) spectra of **31**

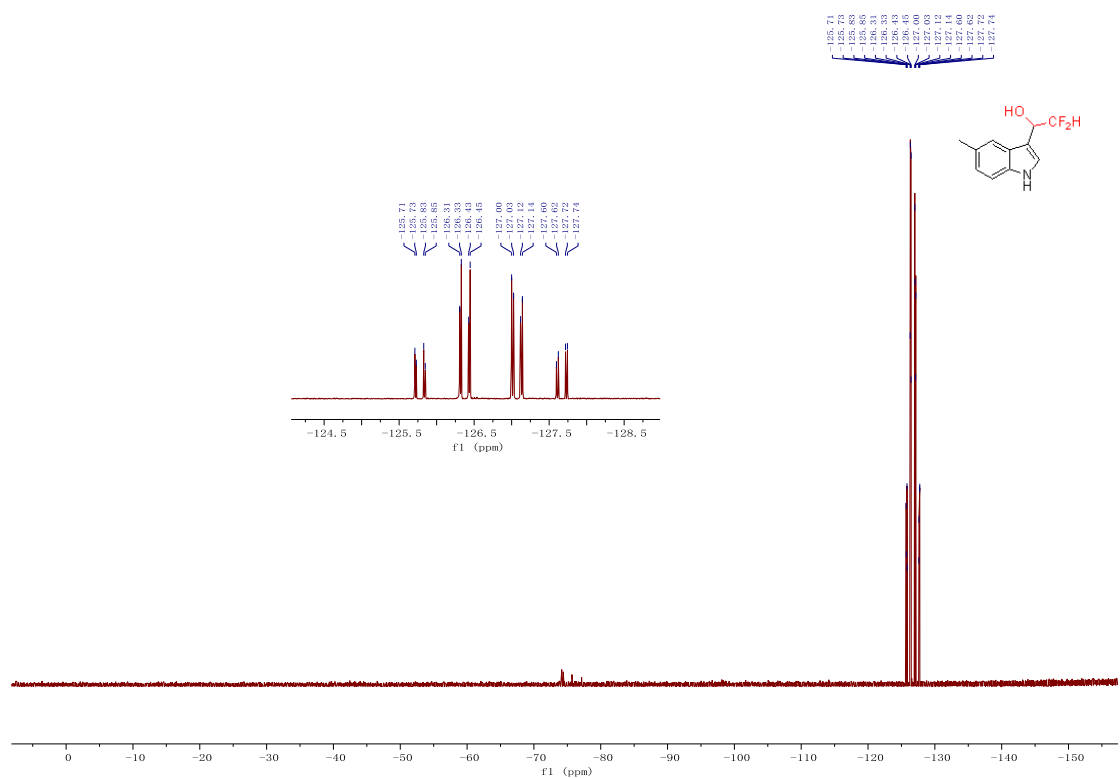

<sup>1</sup>H NMR (500 MHz, Chloroform-*d*) spectra of **3m**

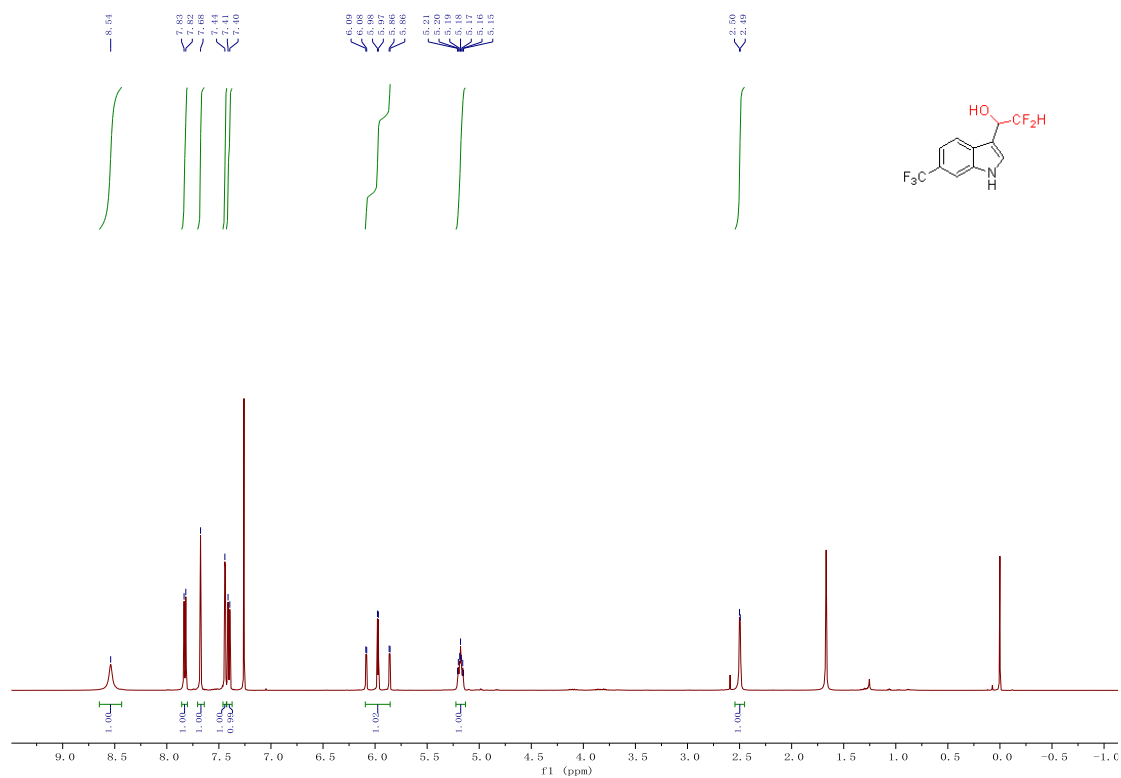

**<sup>13</sup>C NMR (125 MHz, Chloroform-*d*) spectra of **3m****

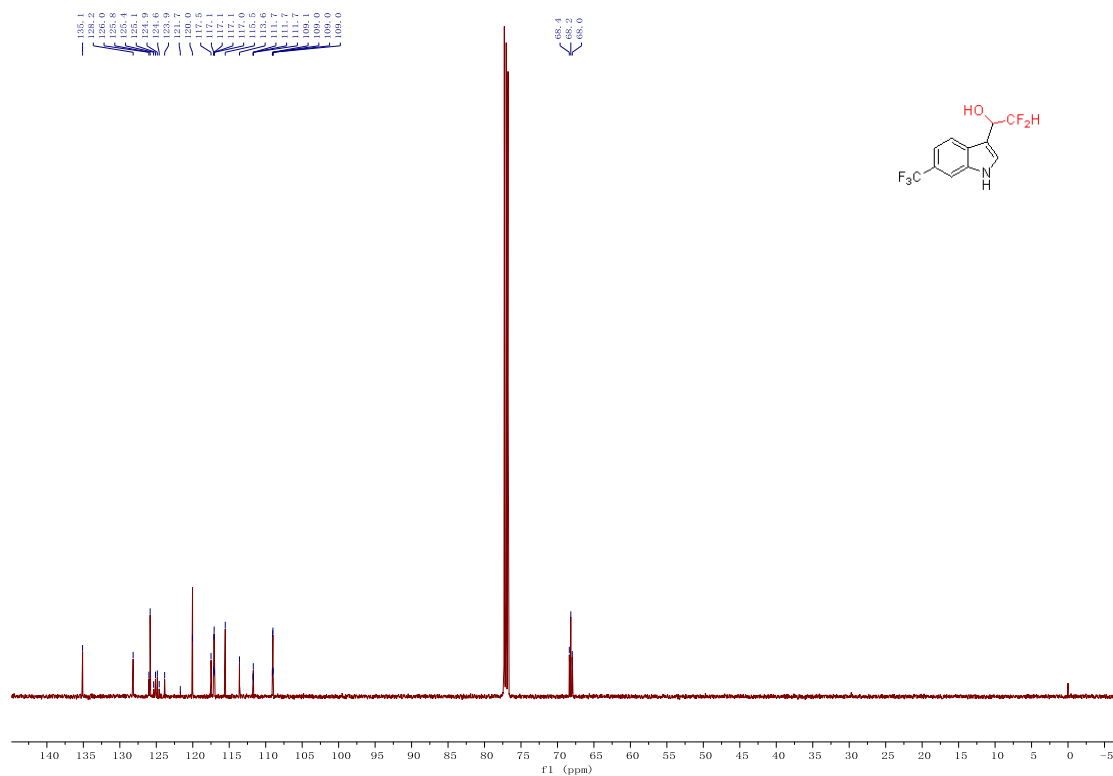

**<sup>19</sup>F NMR (470 MHz, Chloroform-*d*) spectra of **3m****

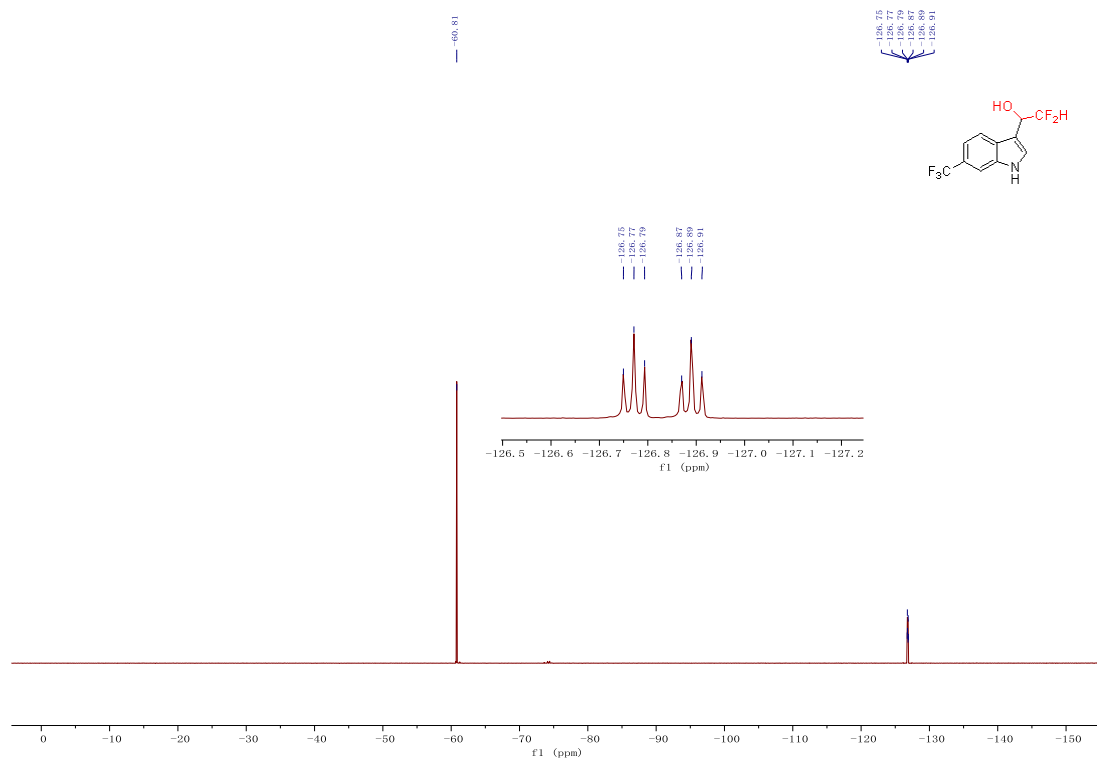

**<sup>1</sup>H NMR (500 MHz, Chloroform-*d*) spectra of **3n****

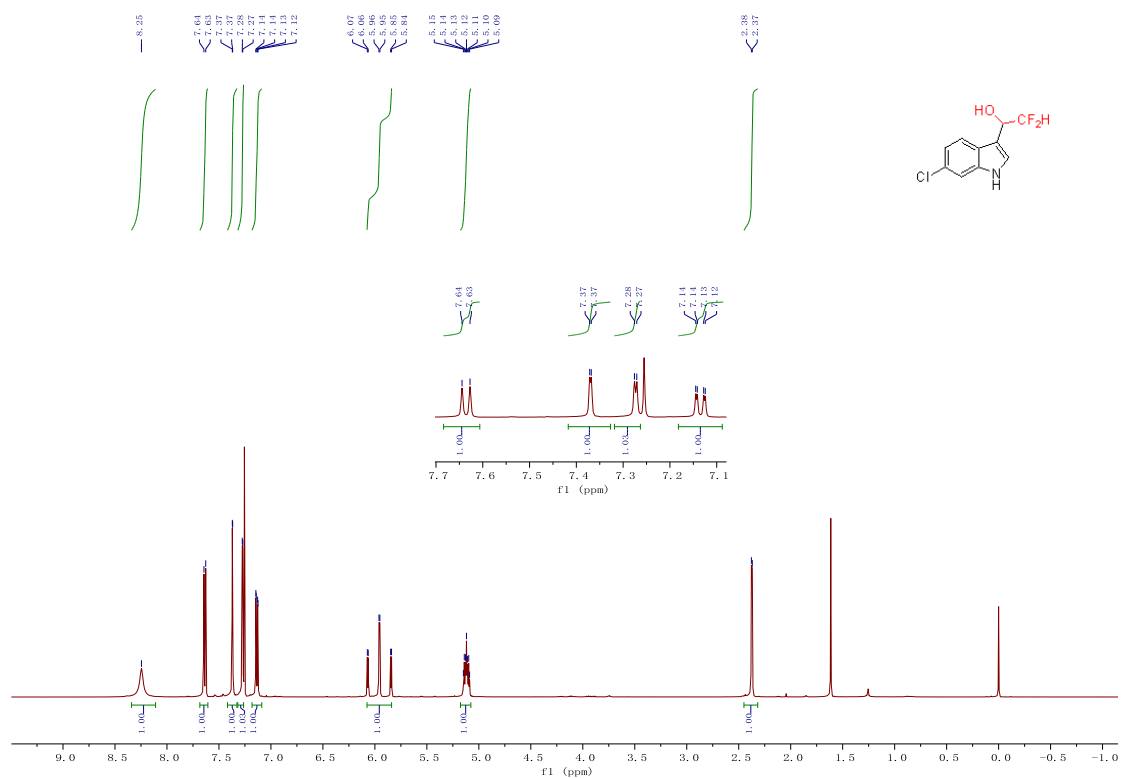

**<sup>13</sup>C NMR (125 MHz, Chloroform-*d*) spectra of **3n****



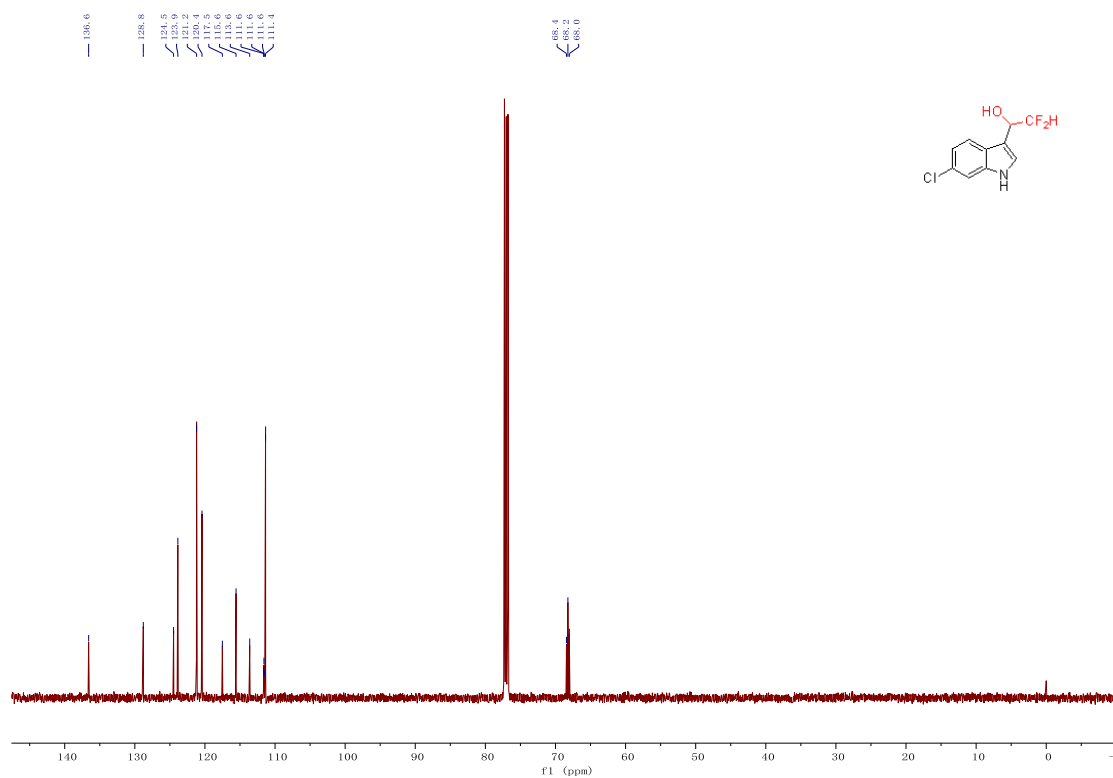

<sup>19</sup>F NMR (470 MHz, Chloroform-*d*) spectra of **3n**

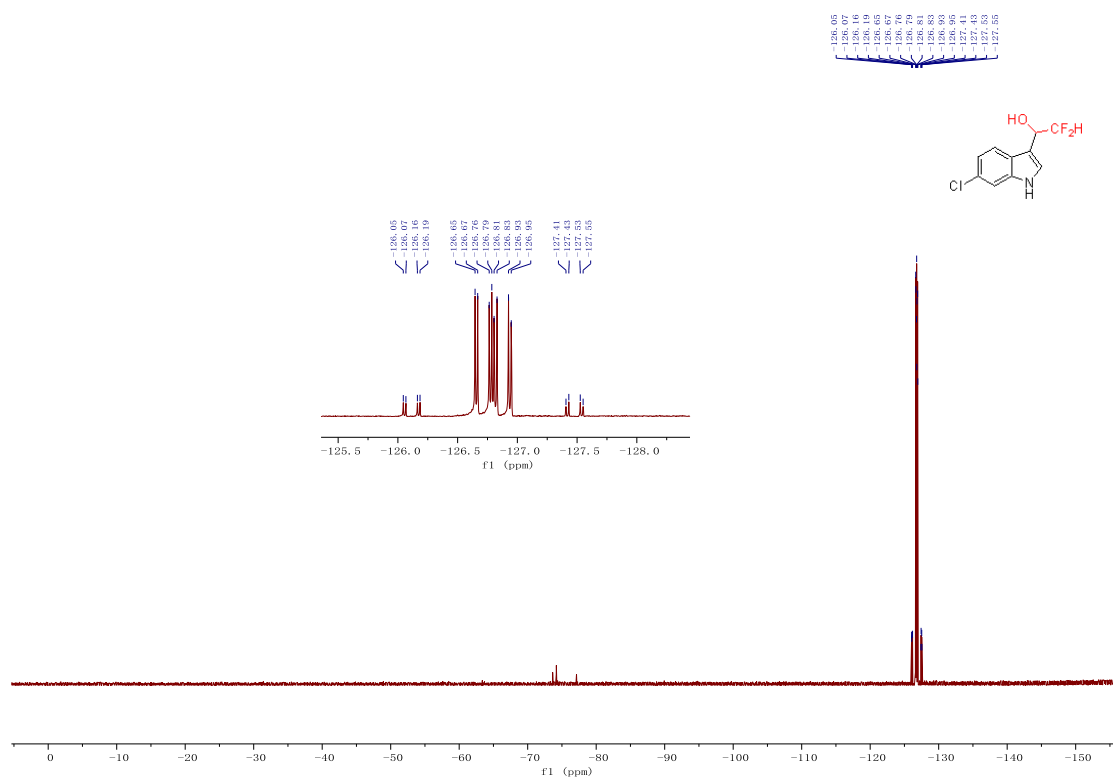

<sup>1</sup>H NMR (500 MHz, Chloroform-*d*) spectra of **3o**

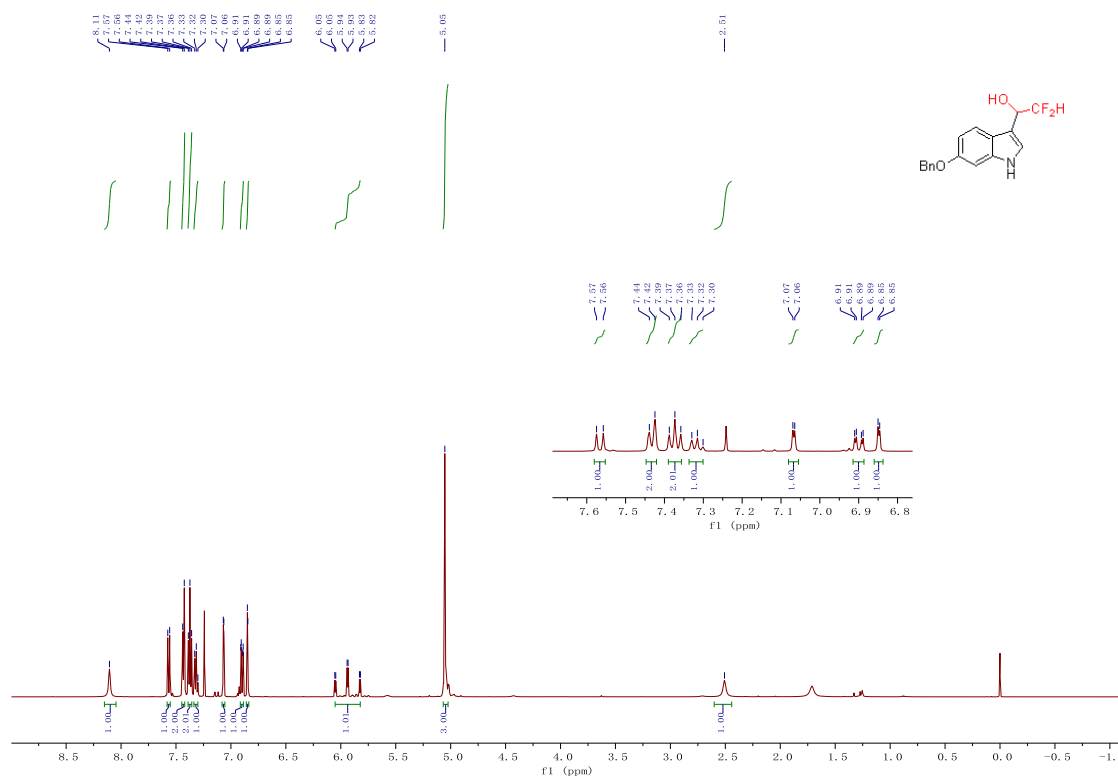

**<sup>13</sup>C NMR (125 MHz, Chloroform-*d*) spectra of **30****

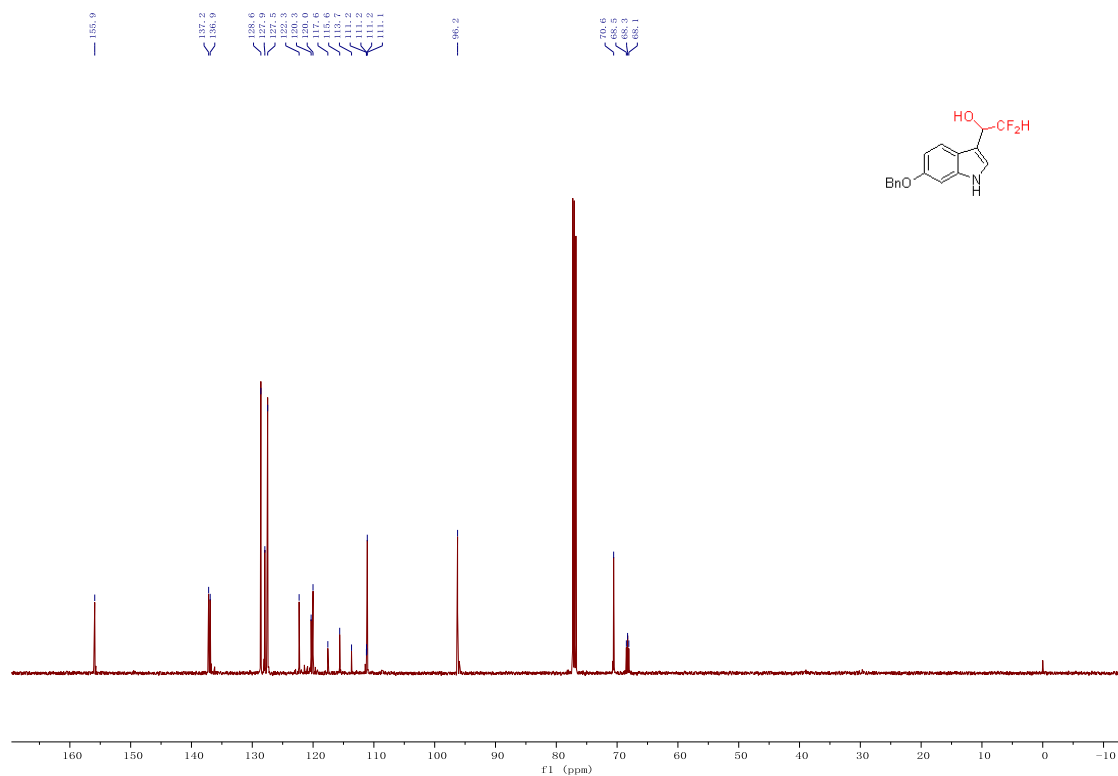

**<sup>19</sup>F NMR (470 MHz, Chloroform-*d*) spectra of **30****

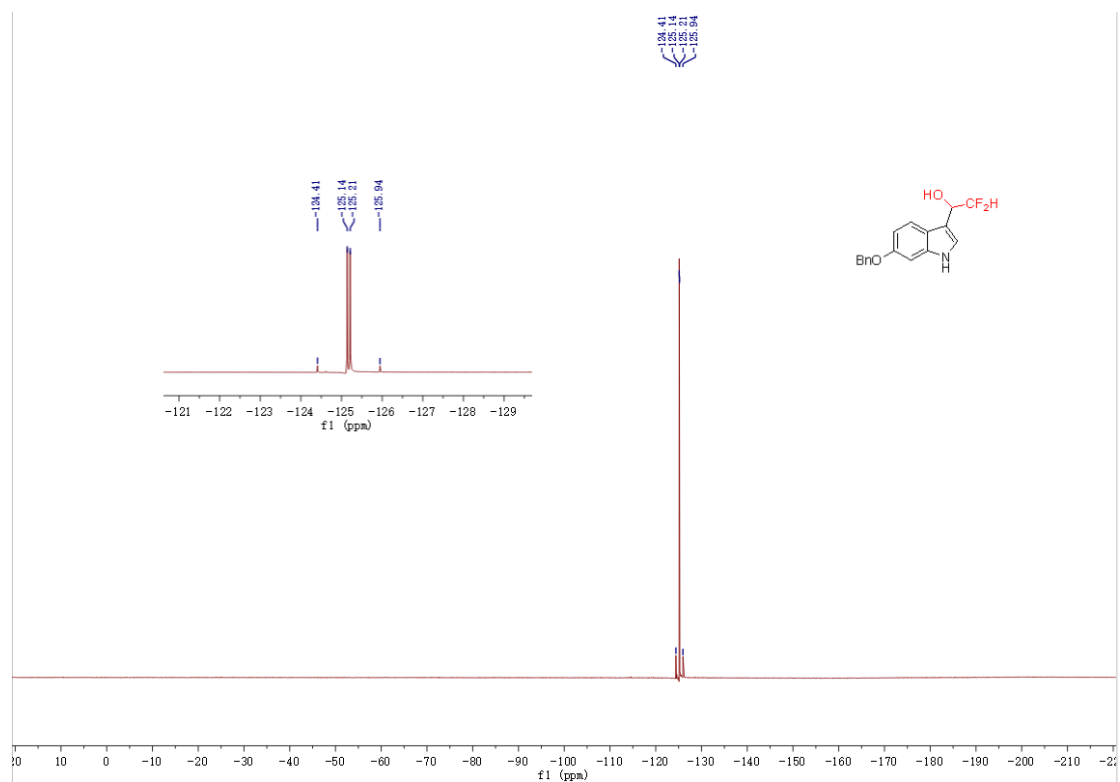

**<sup>1</sup>H NMR (500 MHz, Methanol-*d*<sub>4</sub>) spectra of **3p****

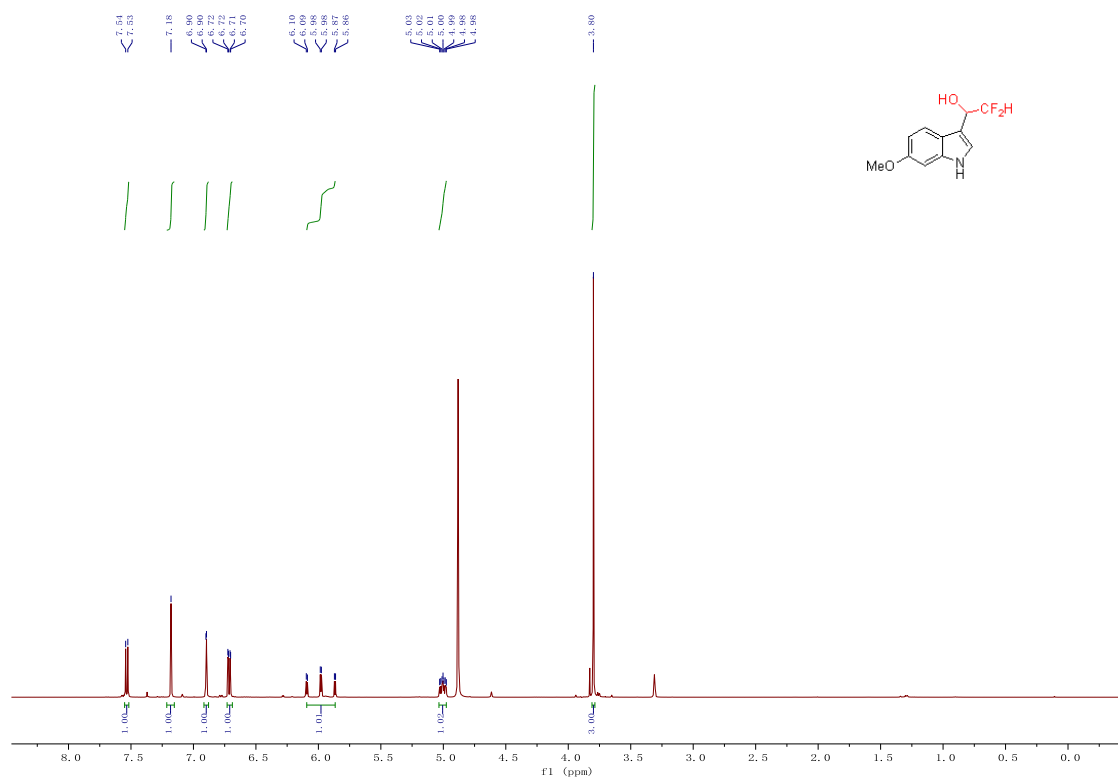

**<sup>13</sup>C NMR (125 MHz, Methanol-*d*<sub>4</sub>) spectra of **3p****

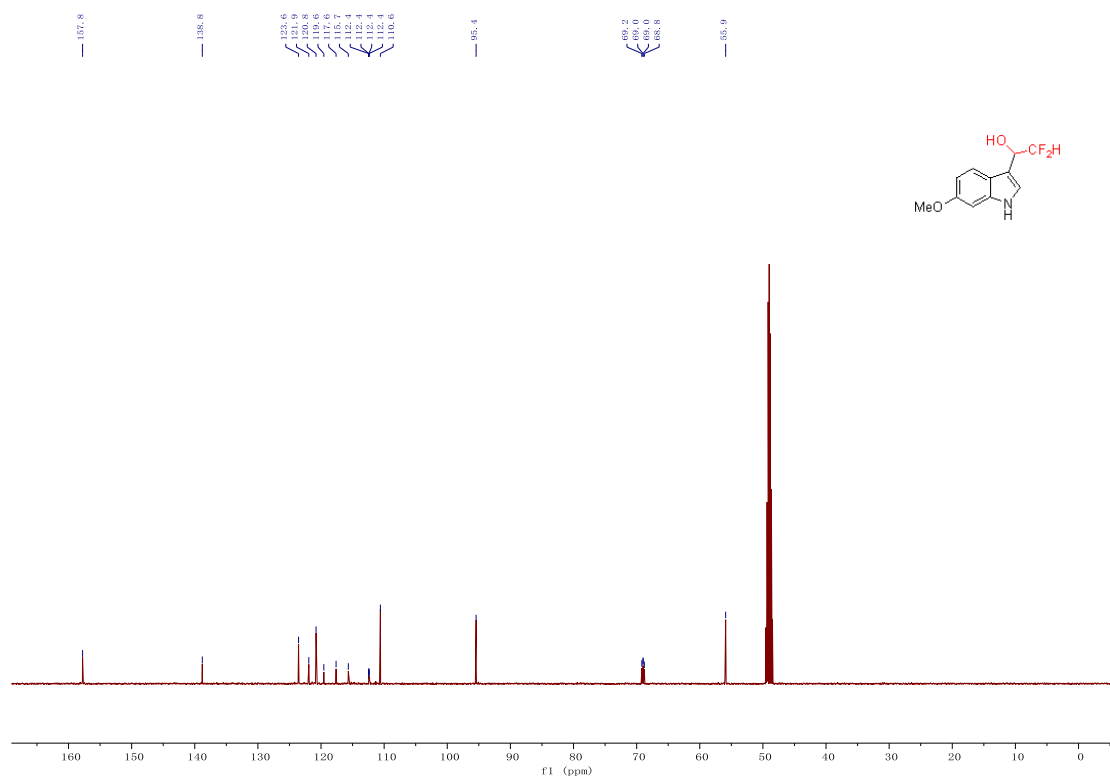

<sup>19</sup>F NMR (470 MHz, Methanol-*d*<sub>4</sub>) spectra of **3p**

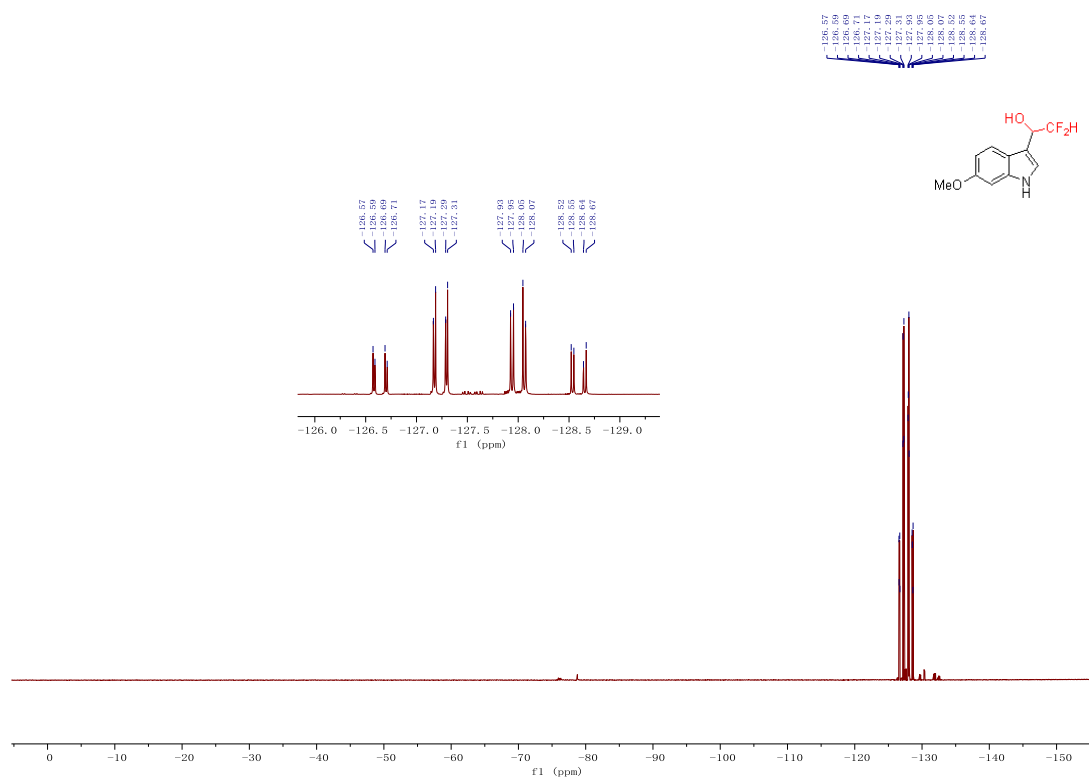

<sup>1</sup>H NMR (500 MHz, Chloroform-*d*) spectra of **3q**

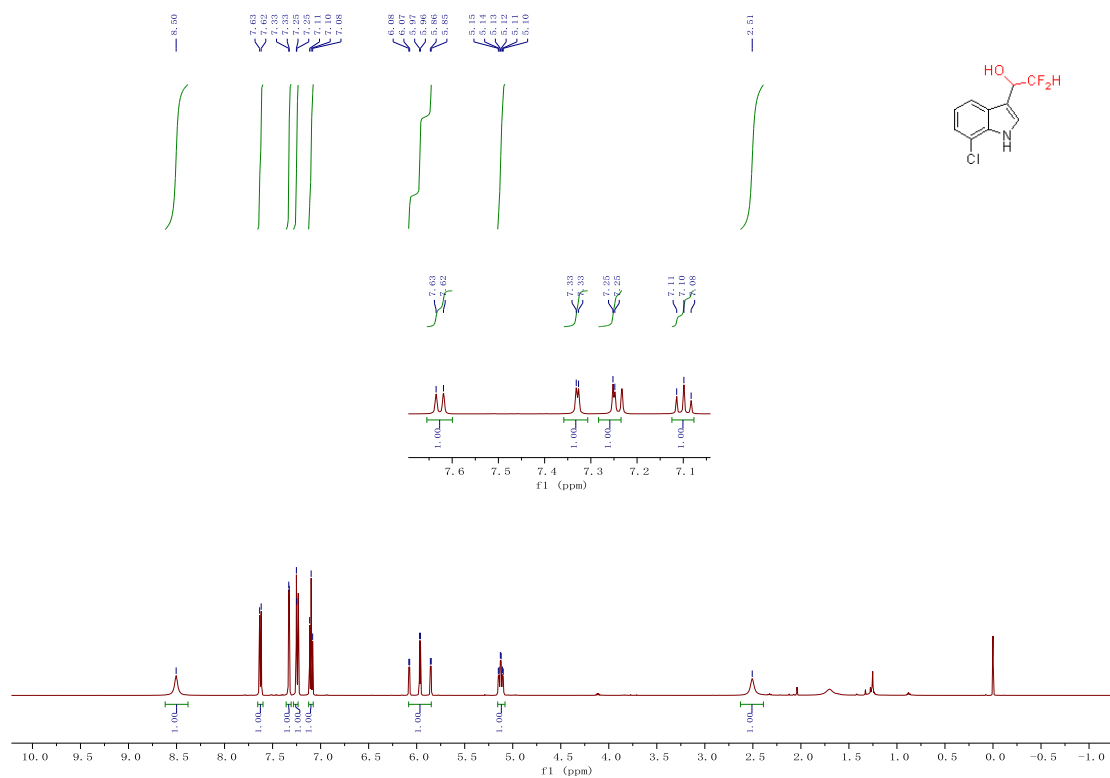

**<sup>13</sup>C NMR (125 MHz, Chloroform-*d*) spectra of 3q**

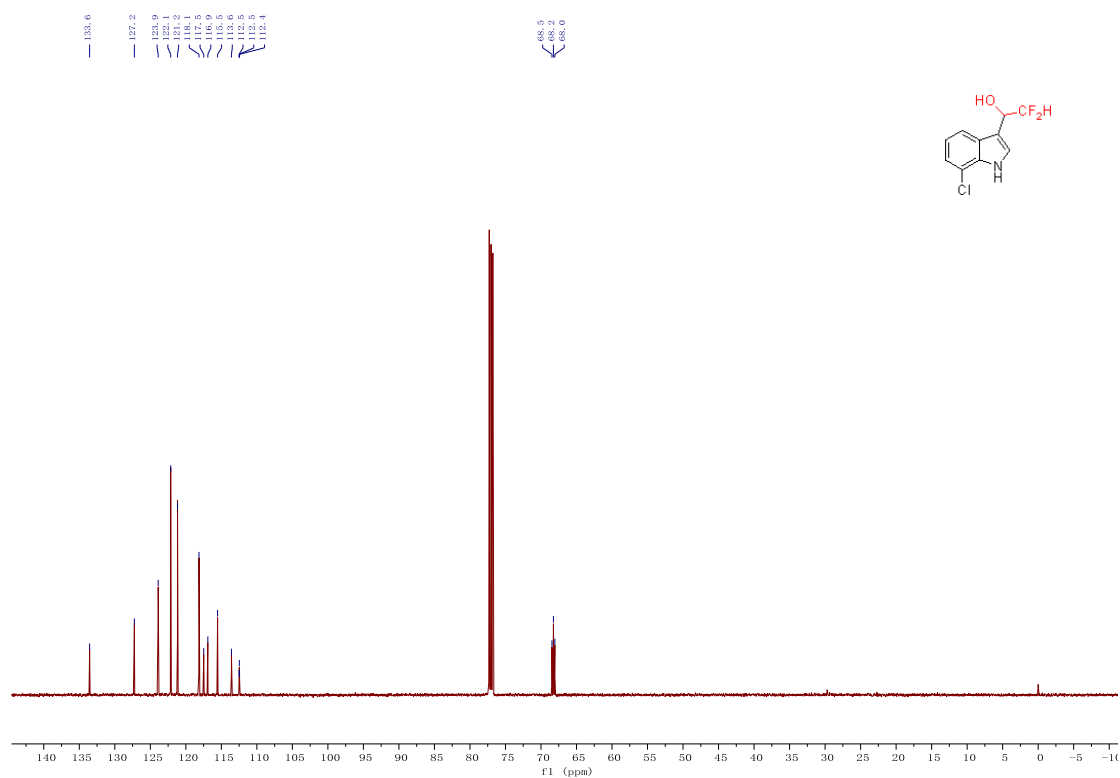

**<sup>19</sup>F NMR (470 MHz, Chloroform-*d*) spectra of 3q**

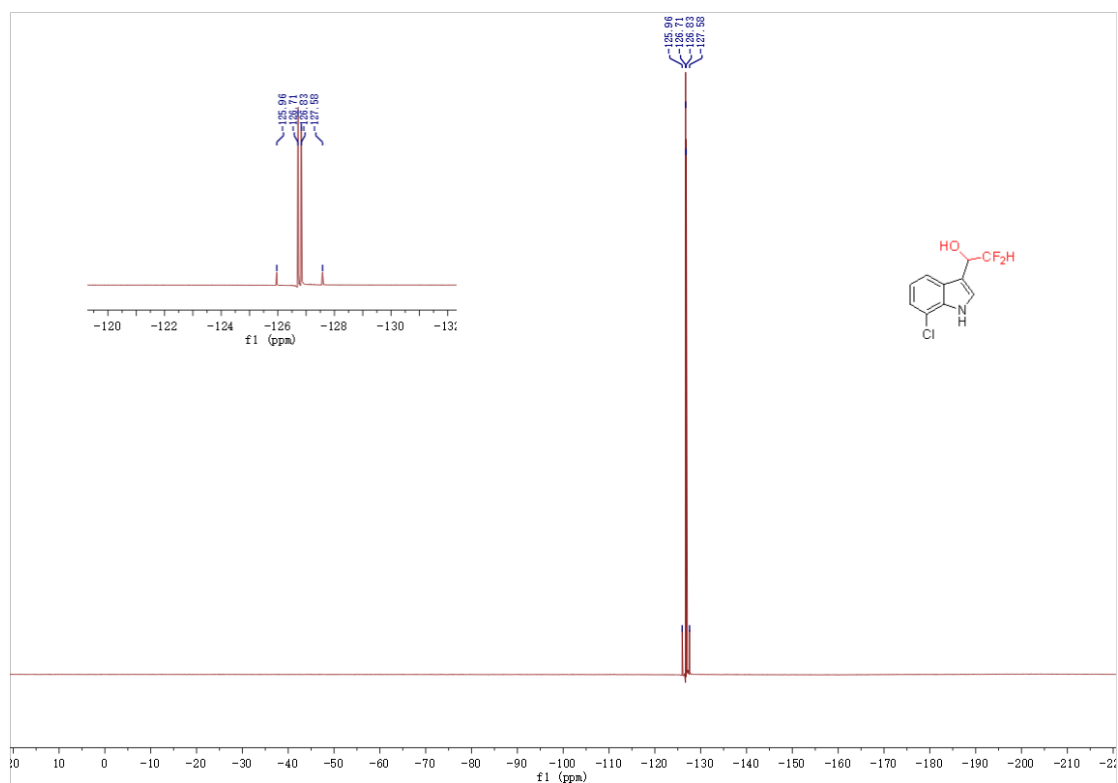

$^{13}\text{C}$  NMR (125 MHz, Chloroform-*d*) spectra of **3r**

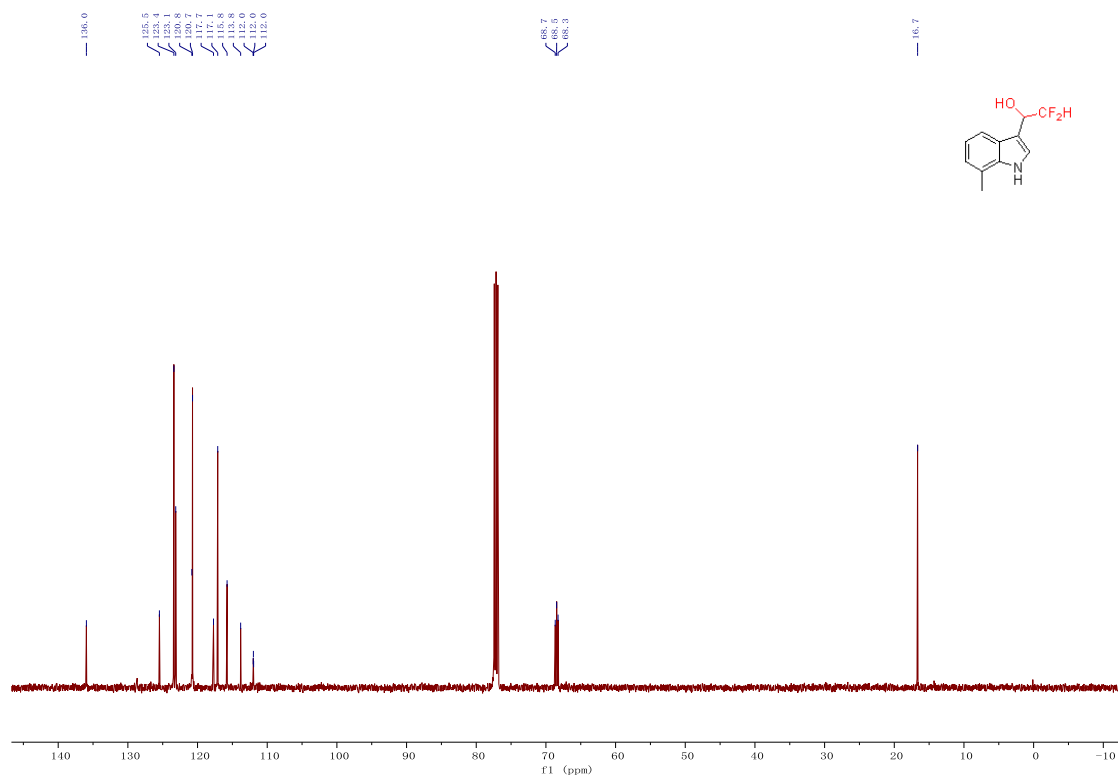

$^{19}\text{F}$  NMR (470 MHz, Chloroform-*d*) spectra of **3r**

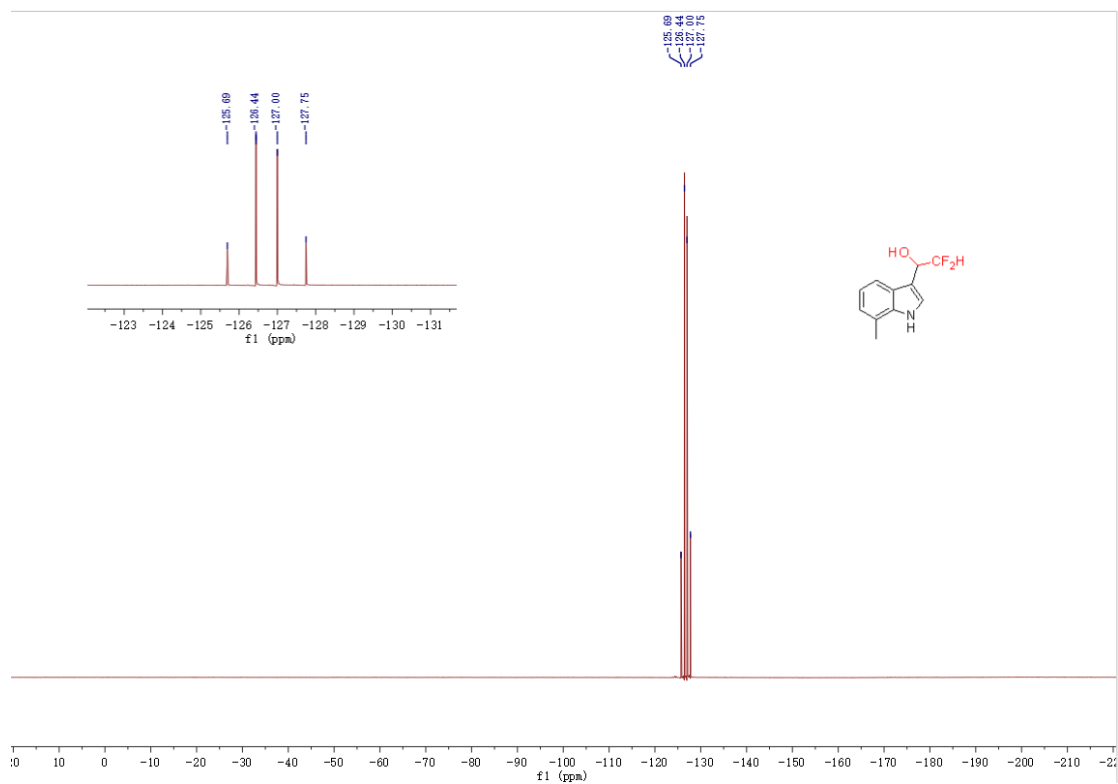

### $^1\text{H}$ NMR (500 MHz, Chloroform-*d*) spectra of **3s**

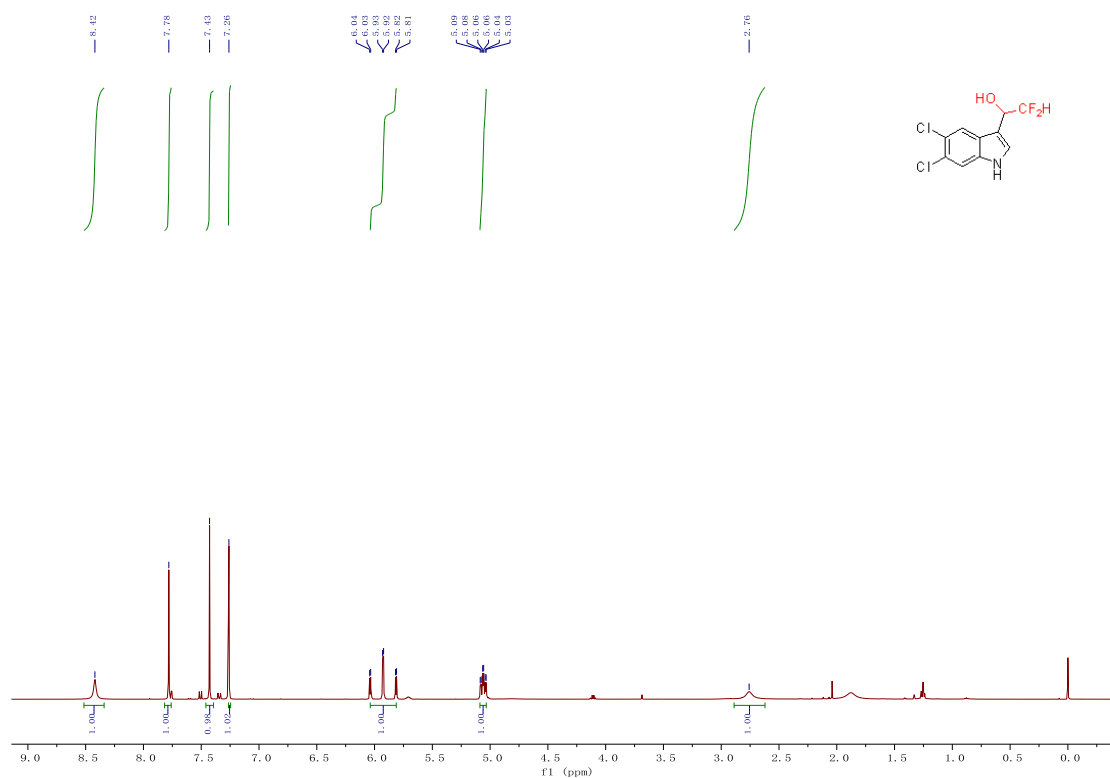

### $^{13}\text{C}$ NMR (125 MHz, Chloroform-*d*) spectra of **3s**

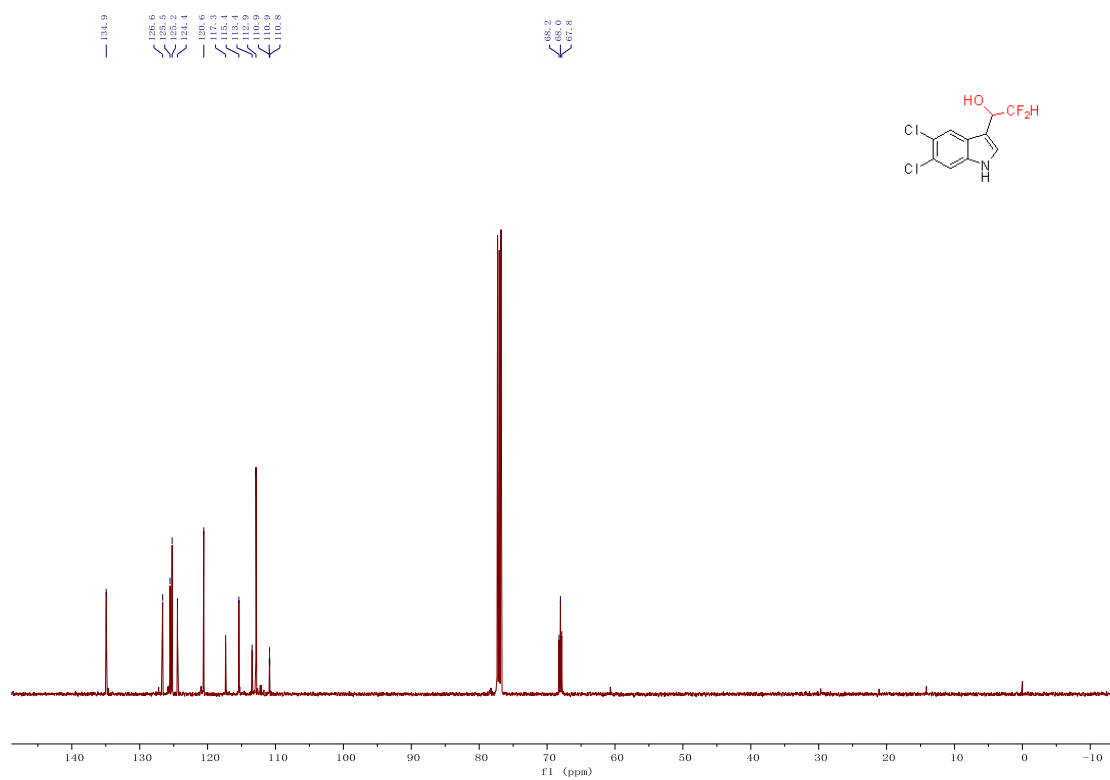



### $^{19}\text{F}$ NMR (470 MHz, Chloroform-*d*) spectra of **3s**

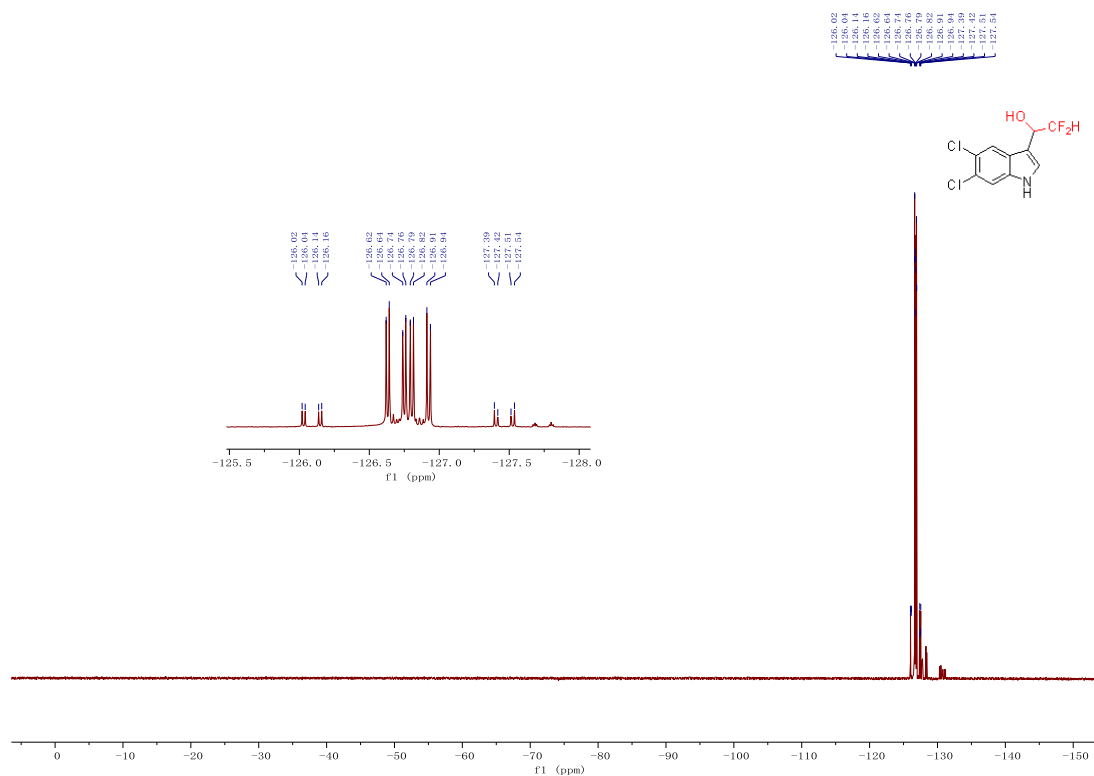

### $^1\text{H}$ NMR (500 MHz, Chloroform-*d*) spectra of **3t**

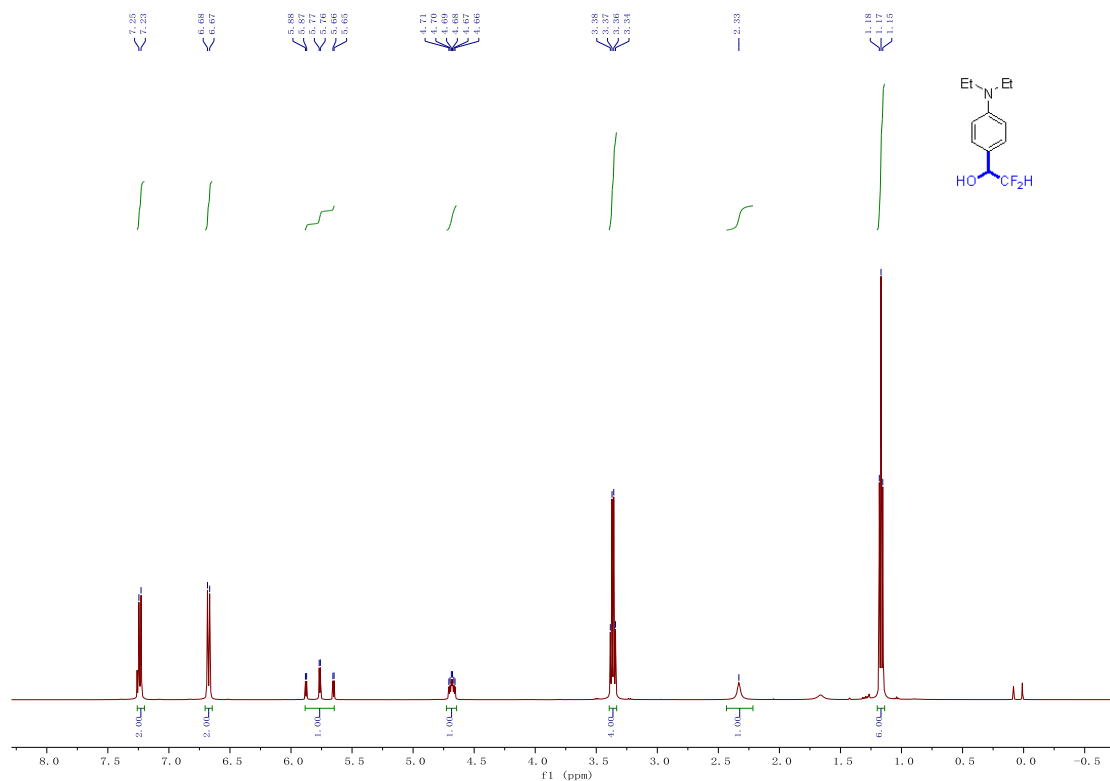

<sup>13</sup>C NMR (125 MHz, Chloroform-*d*) spectra of **3t**

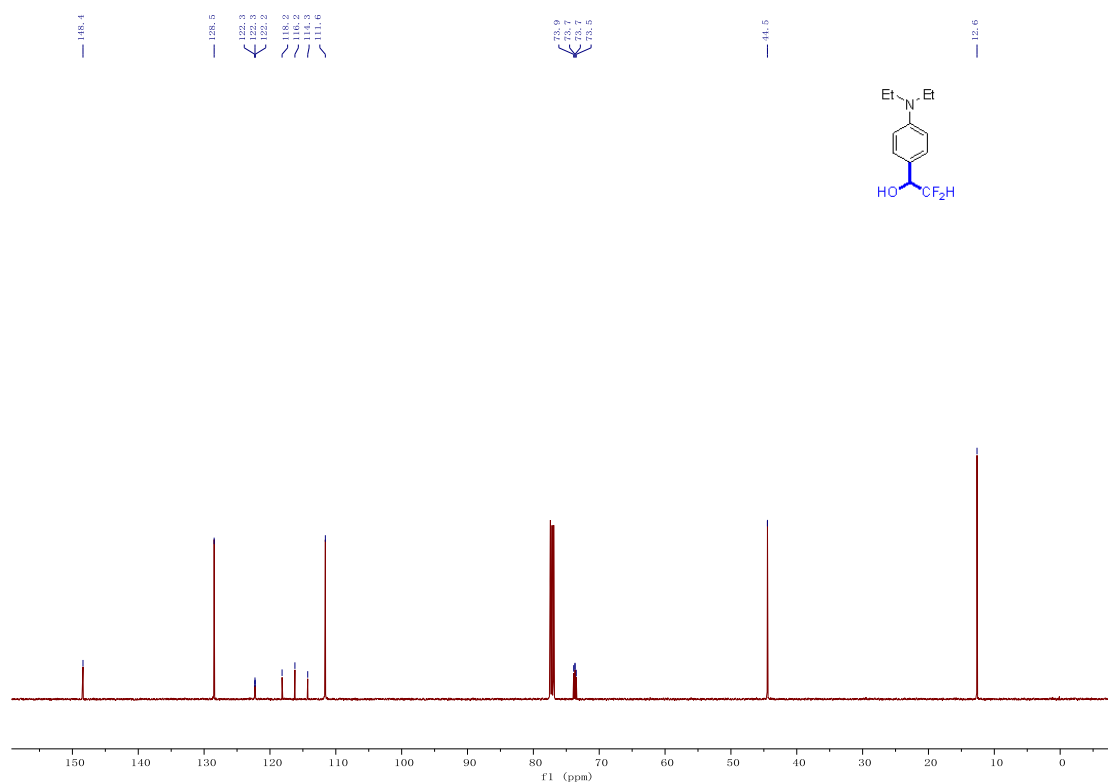

<sup>19</sup>F NMR (470 MHz, Chloroform-*d*) spectra of **3t**

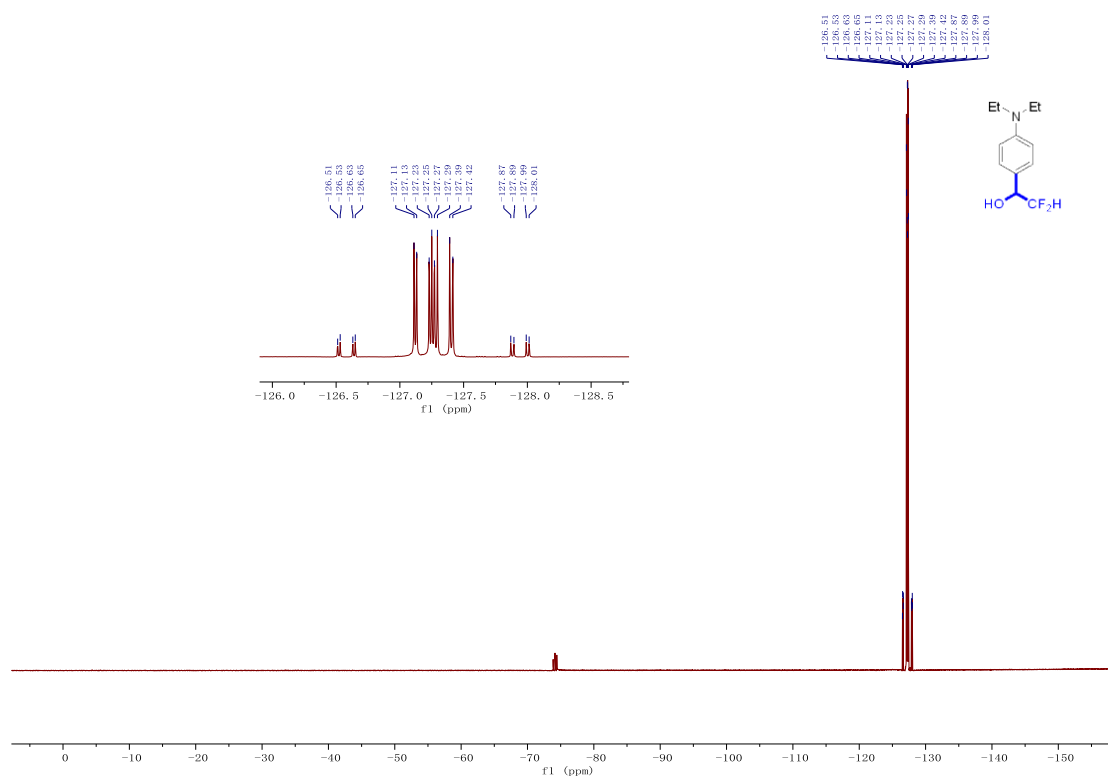

<sup>1</sup>H NMR (500 MHz, Chloroform-*d*) spectra of **3u**

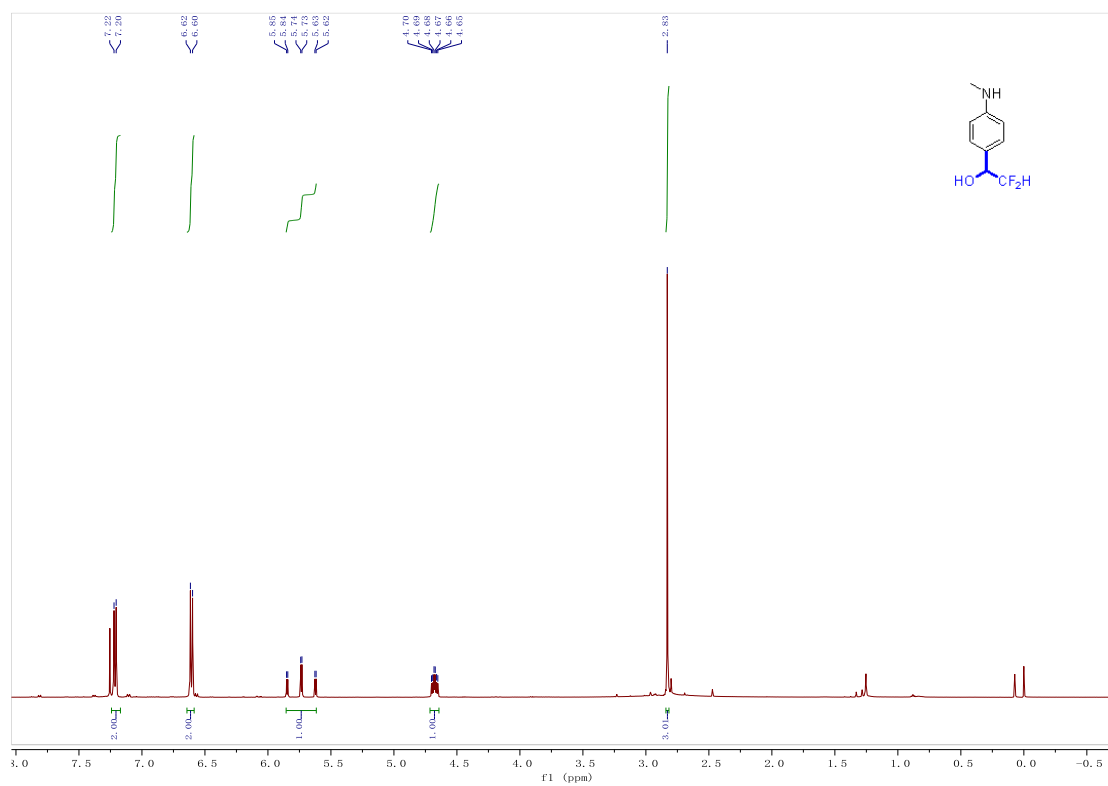

<sup>13</sup>C NMR (125 MHz, Chloroform-*d*) spectra of **3u**

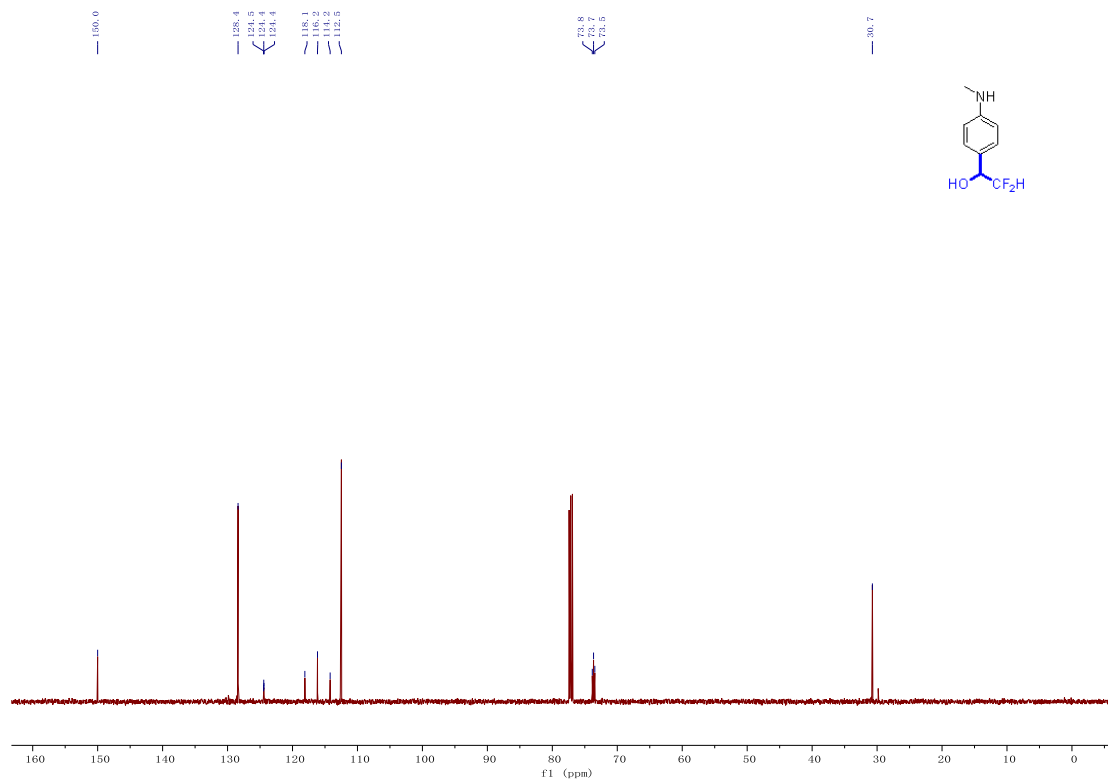

$^{19}\text{F}$  NMR (470 MHz, Chloroform- $d$ ) spectra of **3u**

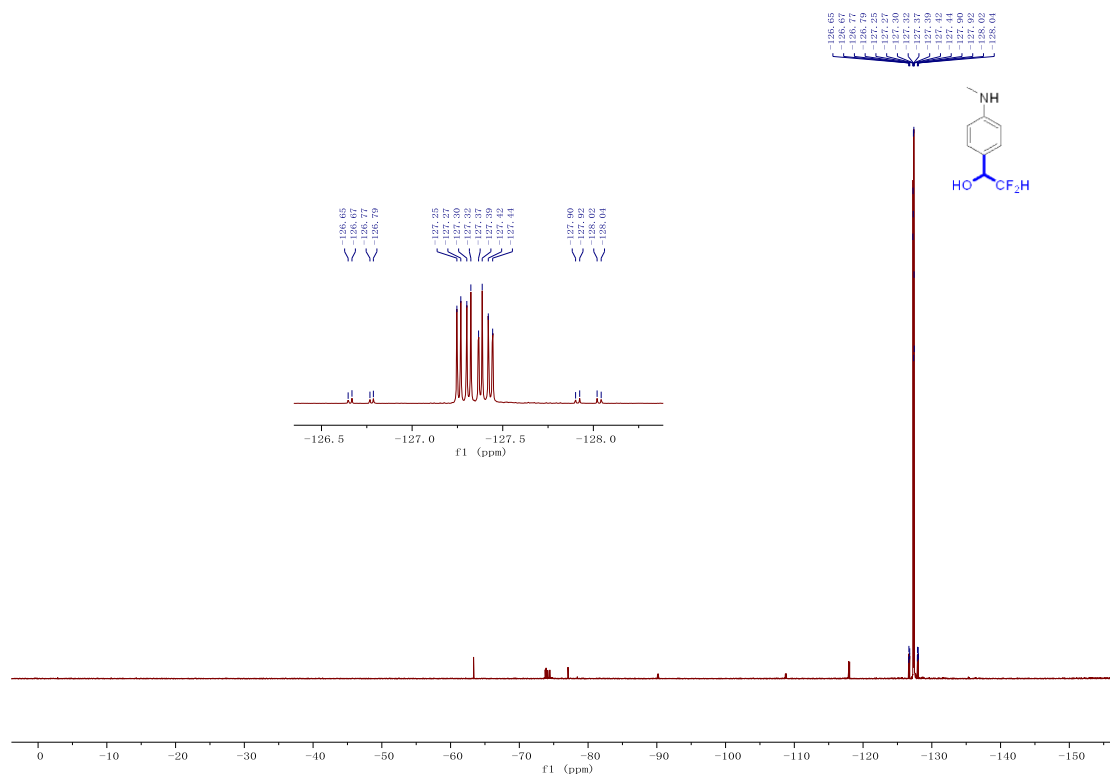

$^1\text{H}$  NMR (500 MHz, Methanol- $d_4$ ) spectra of **3v**

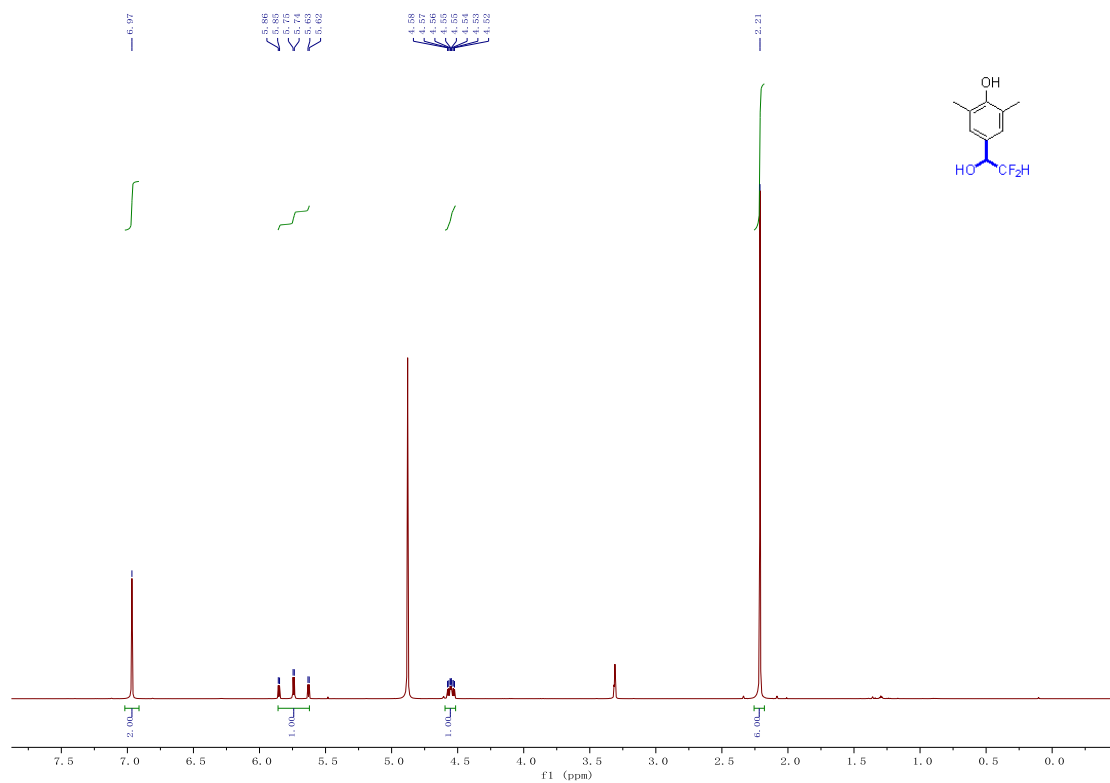

<sup>13</sup>C NMR (125 MHz, Methanol-*d*<sub>4</sub>) spectra of **3v**

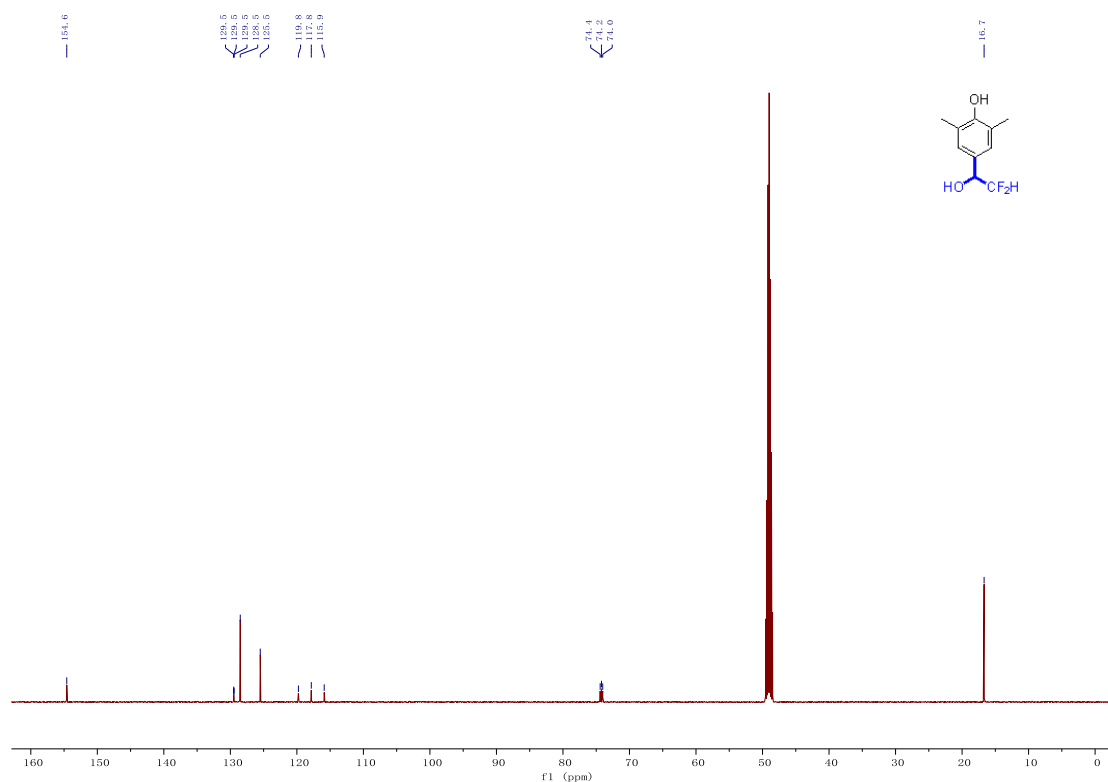

<sup>19</sup>F NMR (470 MHz, Methanol-*d*<sub>4</sub>) spectra of **3v**

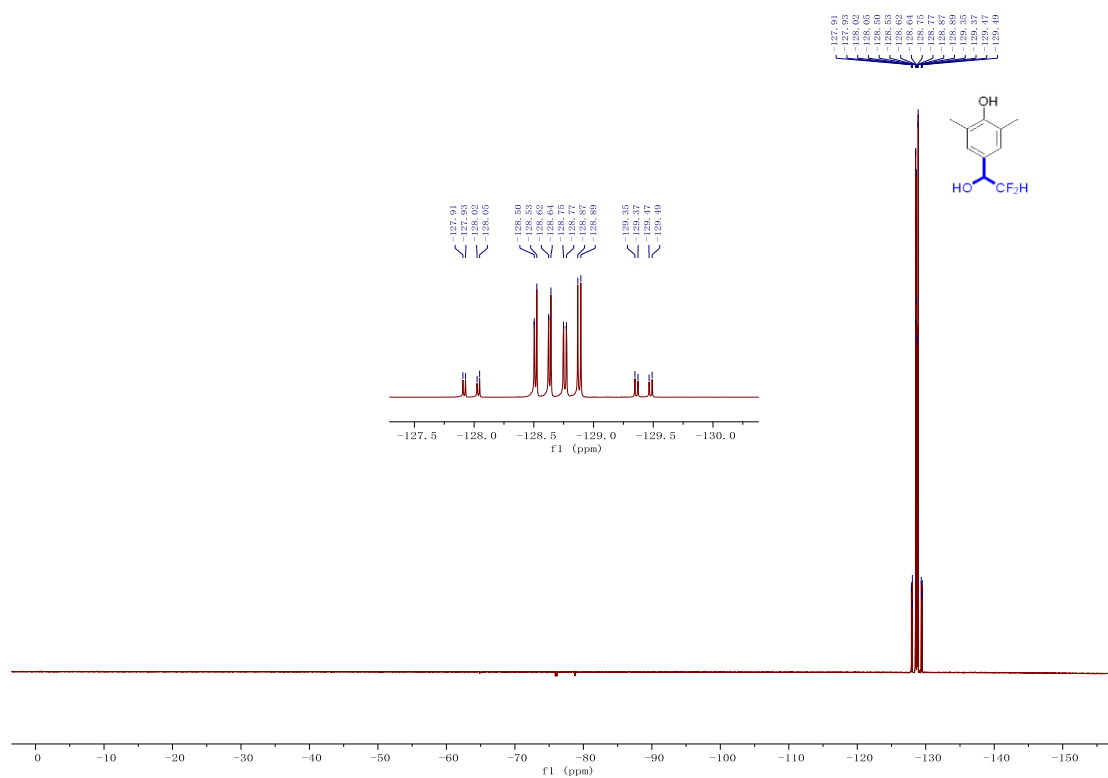

### $^1\text{H}$ NMR (500 MHz, $\text{DMSO}-d_6$ ) spectra of **3w**

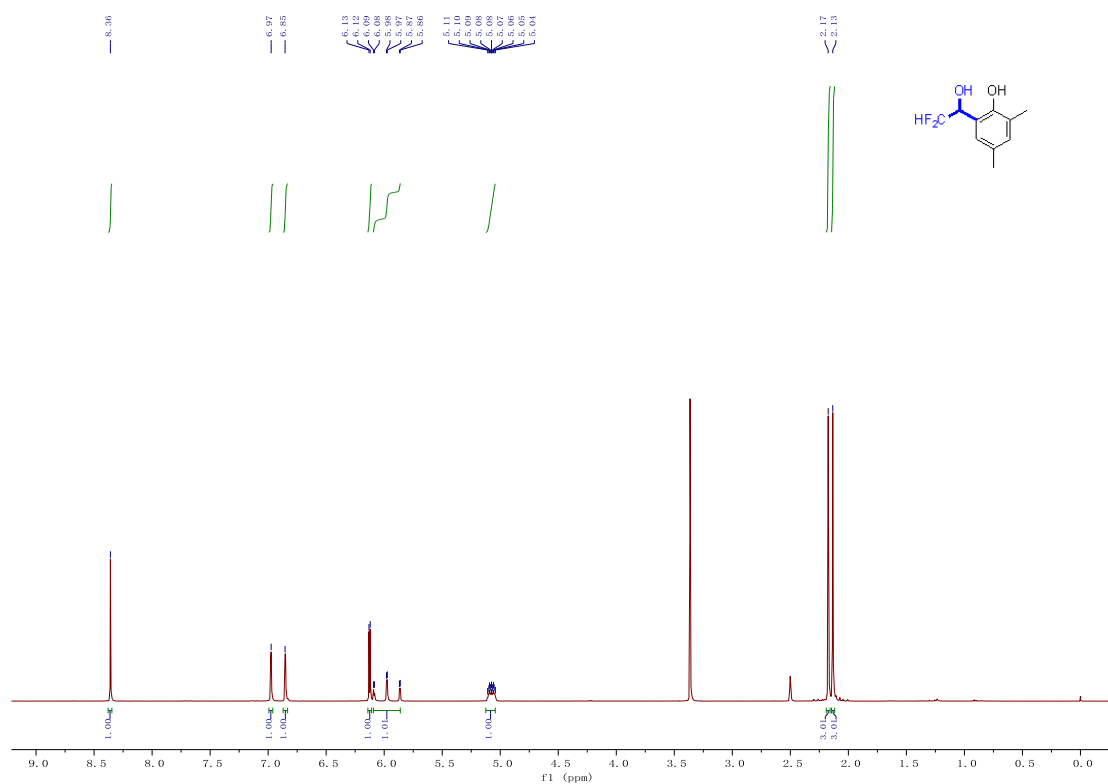

### $^{13}\text{C}$ NMR (125 MHz, $\text{DMSO}-d_6$ ) spectra of **3w**

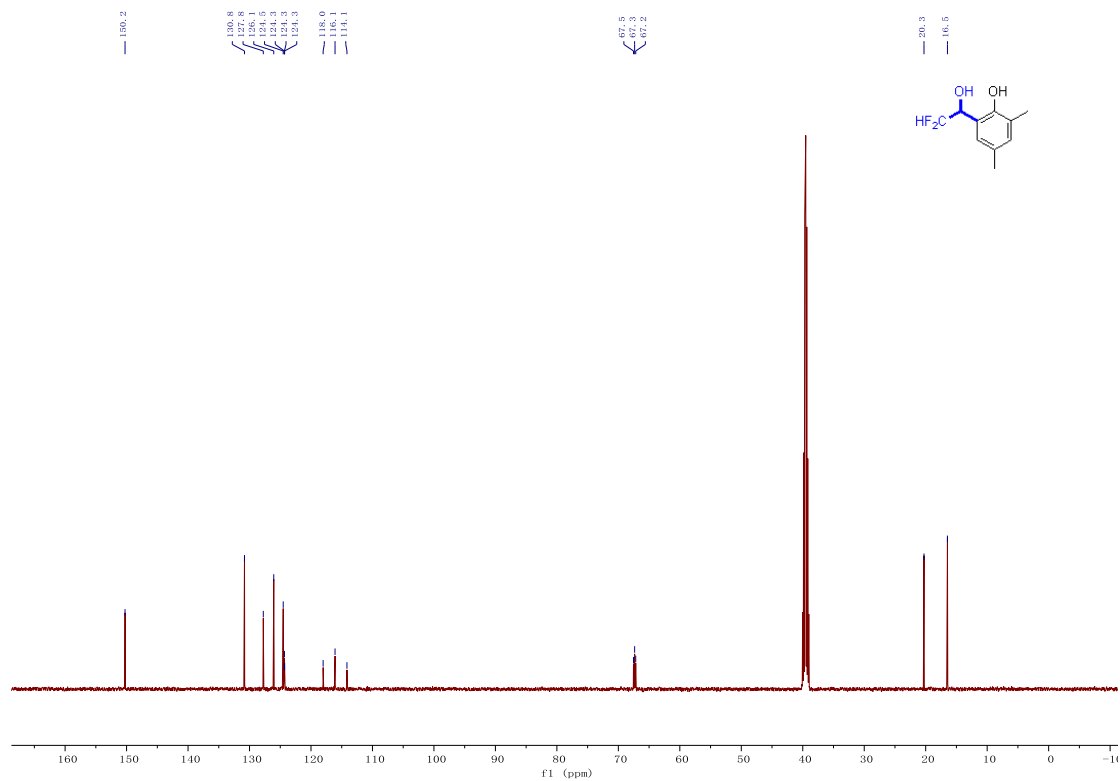

<sup>19</sup>F NMR (470 MHz, DMSO-*d*<sub>6</sub>) spectra of **3w**

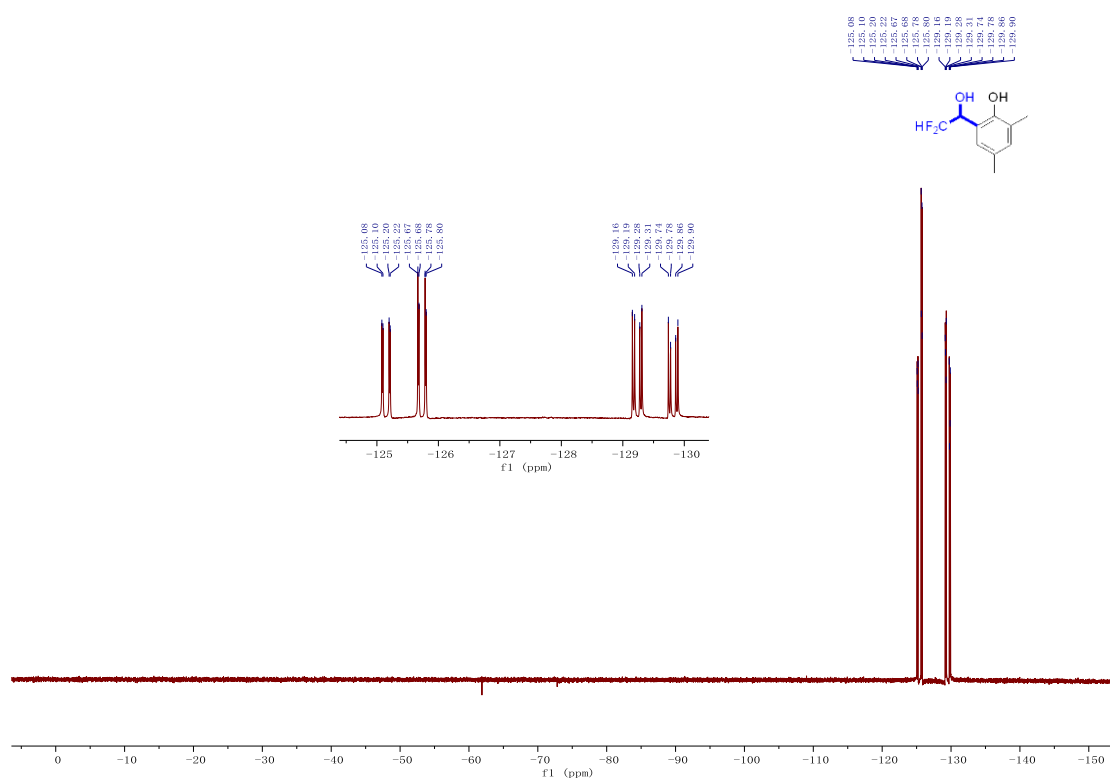

<sup>1</sup>H NMR (500 MHz, Methanol-*d*<sub>4</sub>) spectra of **3x**

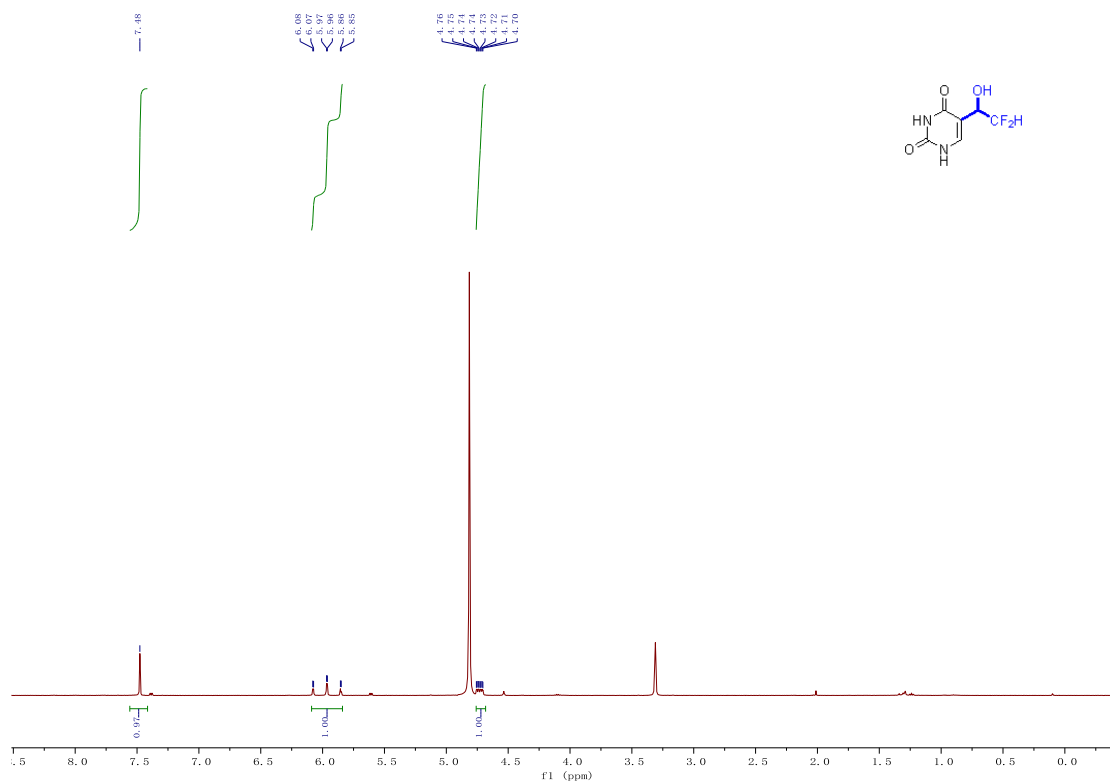

<sup>13</sup>C NMR (125 MHz, Methanol-*d*<sub>4</sub>) spectra of **3x**

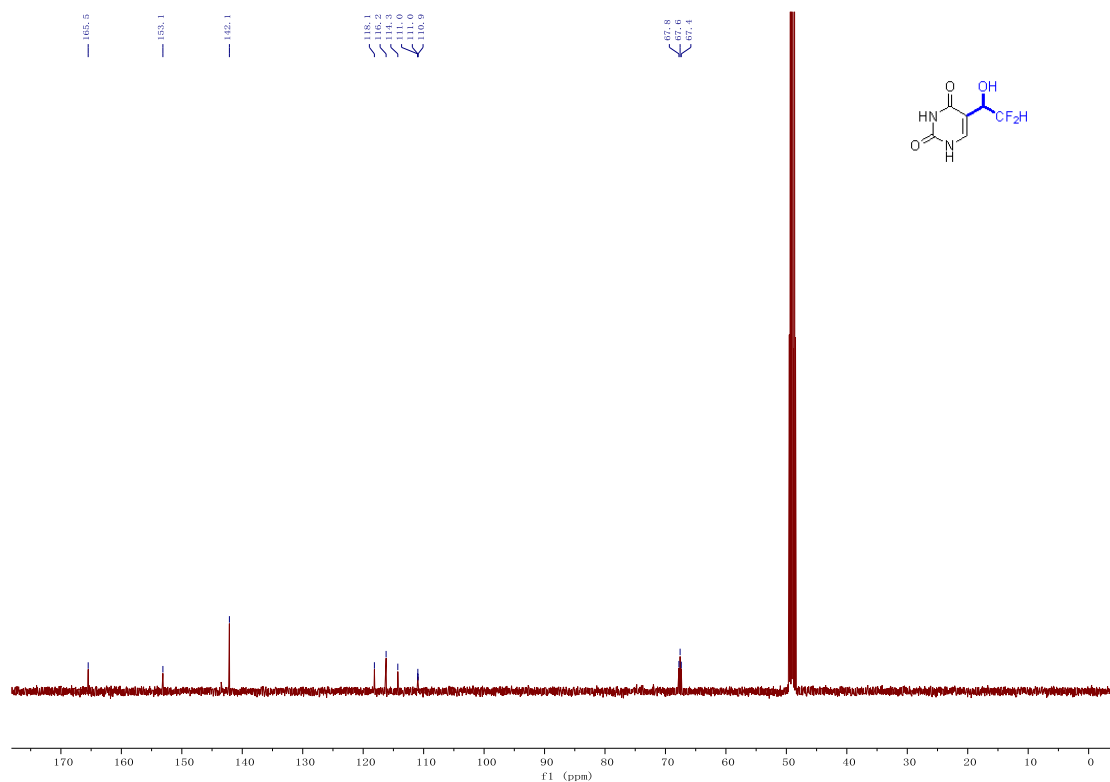

<sup>19</sup>F NMR (470 MHz, Methanol-*d*<sub>4</sub>) spectra of **3x**



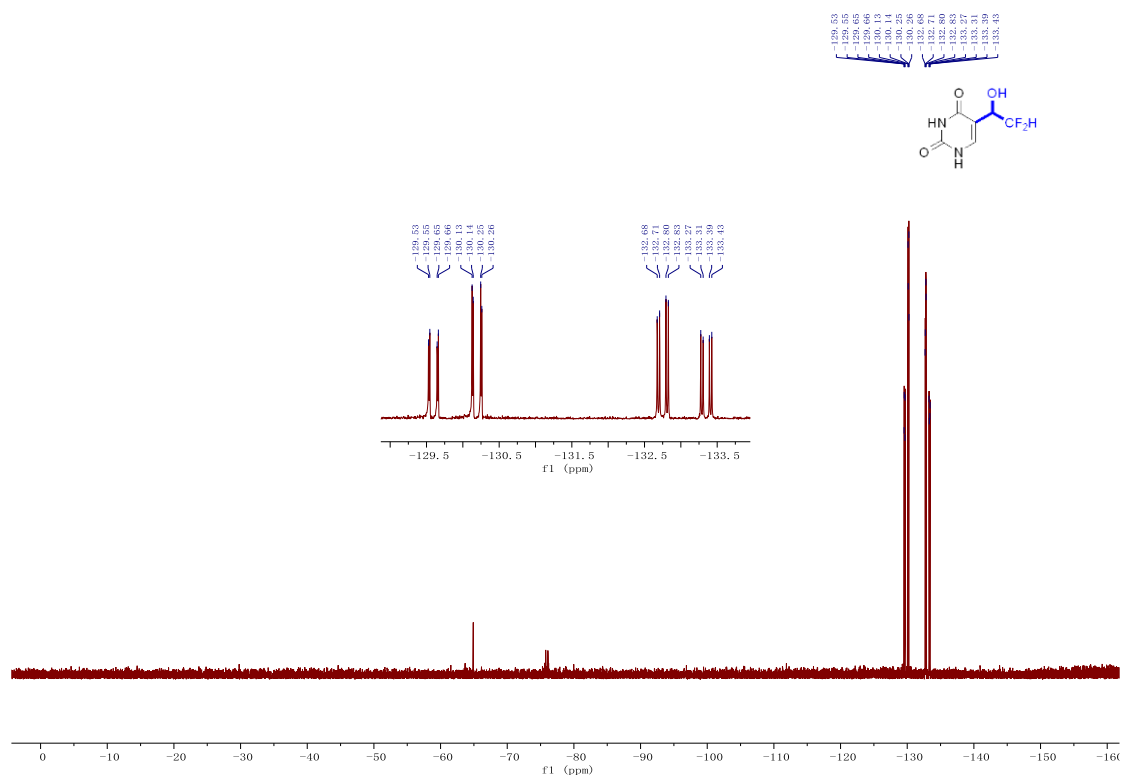

<sup>1</sup>H NMR (500 MHz, Methanol-d<sub>4</sub>) spectra of **4a**

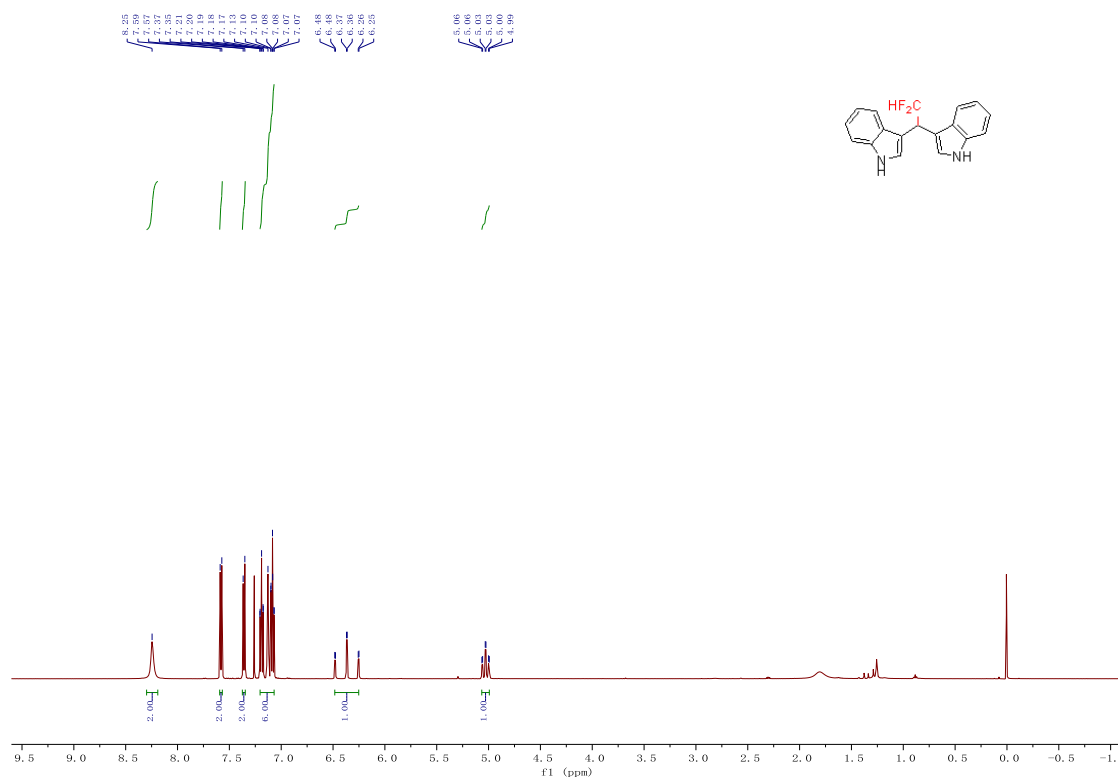

<sup>13</sup>C NMR (125 MHz, Methanol-*d*<sub>4</sub>) spectra of **4a**

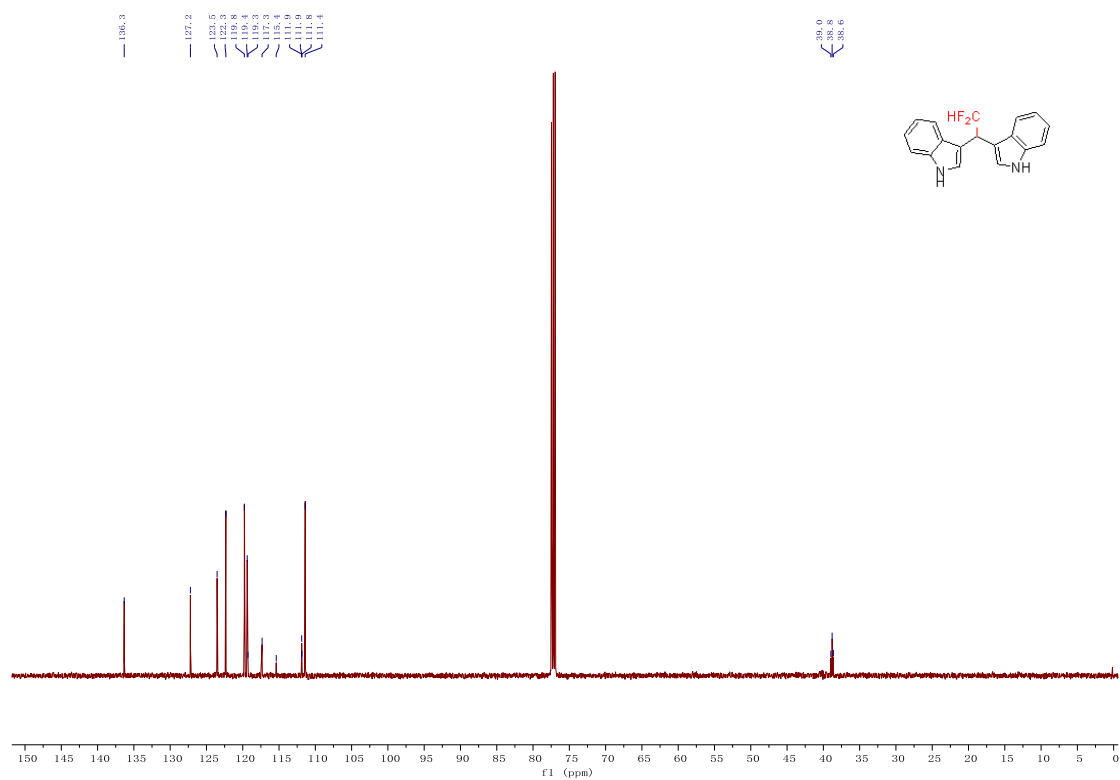

<sup>19</sup>F NMR (470 MHz, Methanol-*d*<sub>4</sub>) spectra of **4a**

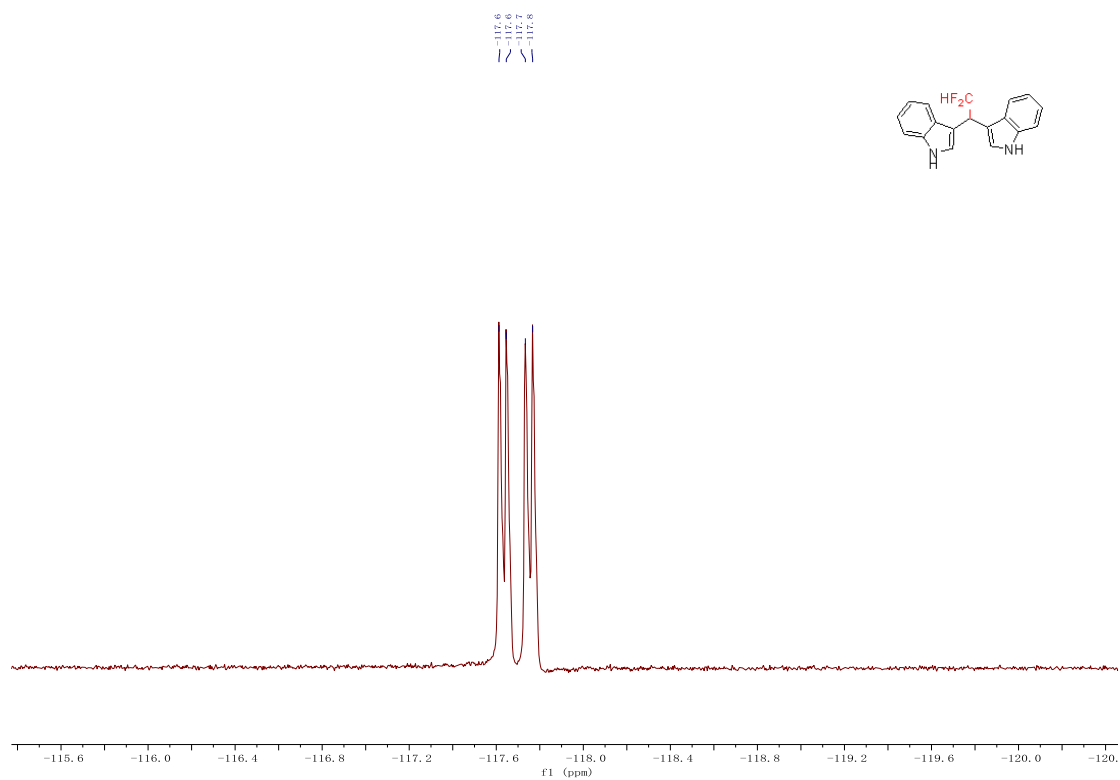

<sup>1</sup>H NMR (500 MHz, Methanol-*d*<sub>4</sub>) spectra of **4b**

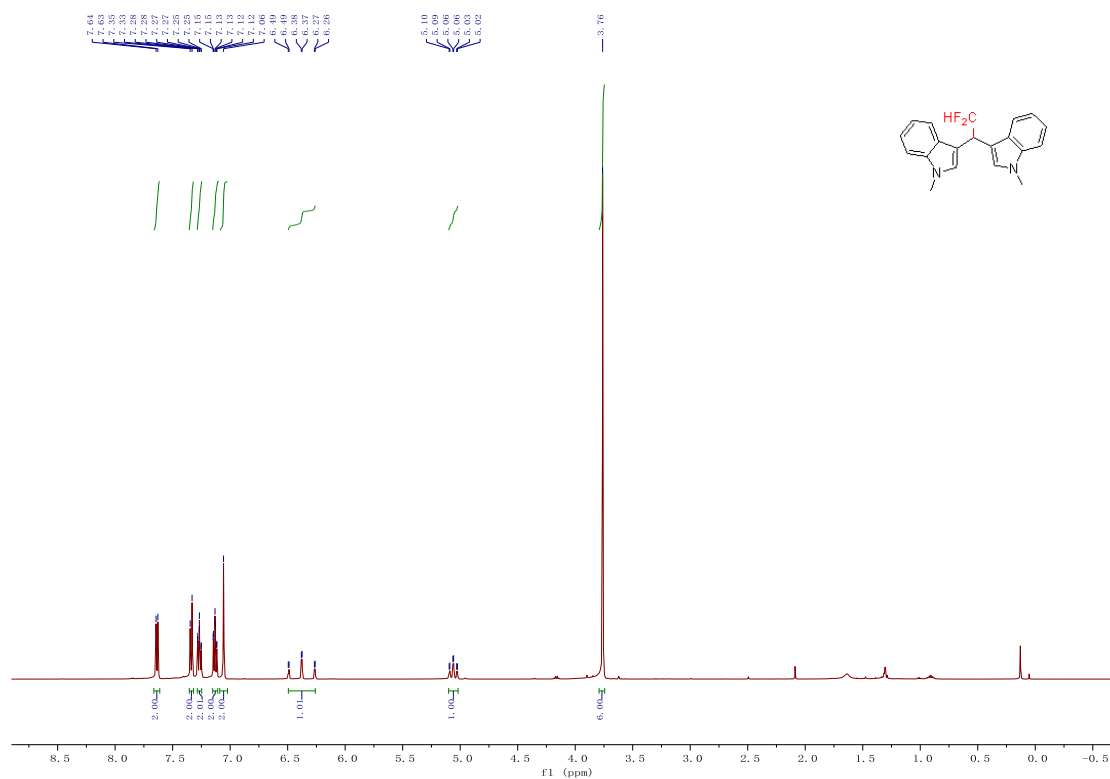

<sup>13</sup>C NMR (125 MHz, Methanol-*d*<sub>4</sub>) spectra of **4b**

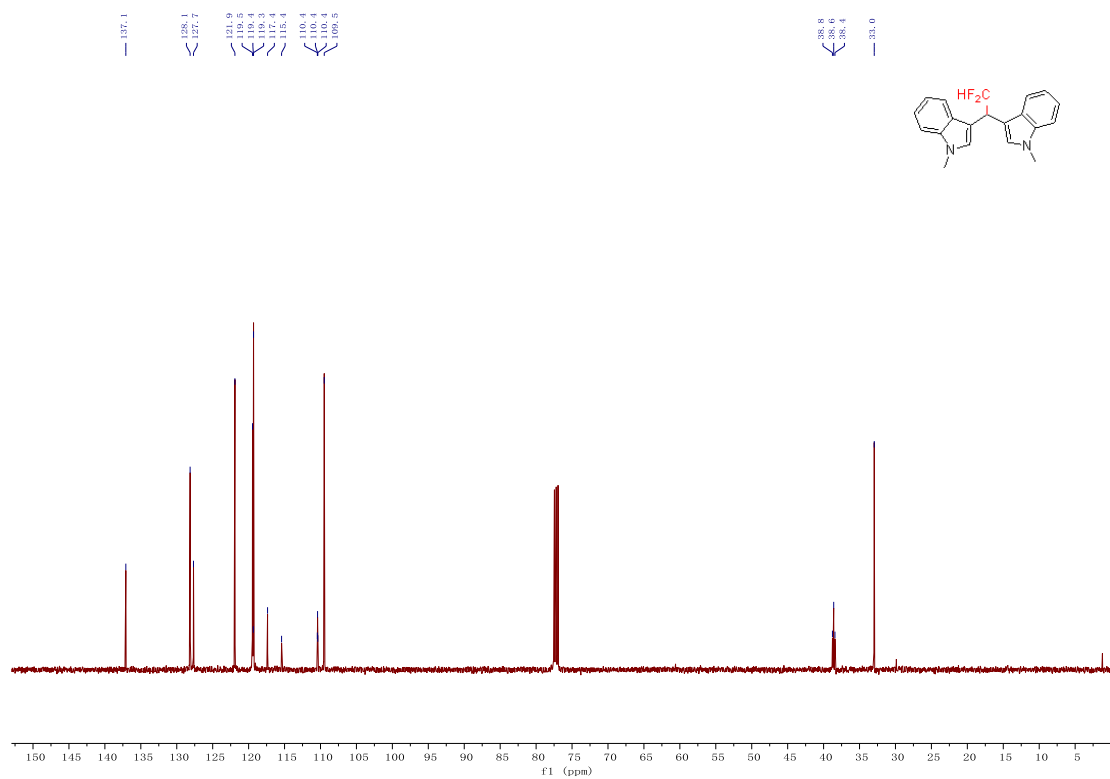

$^{19}\text{F}$  NMR (470 MHz, Methanol- $d_4$ ) spectra of **4b**

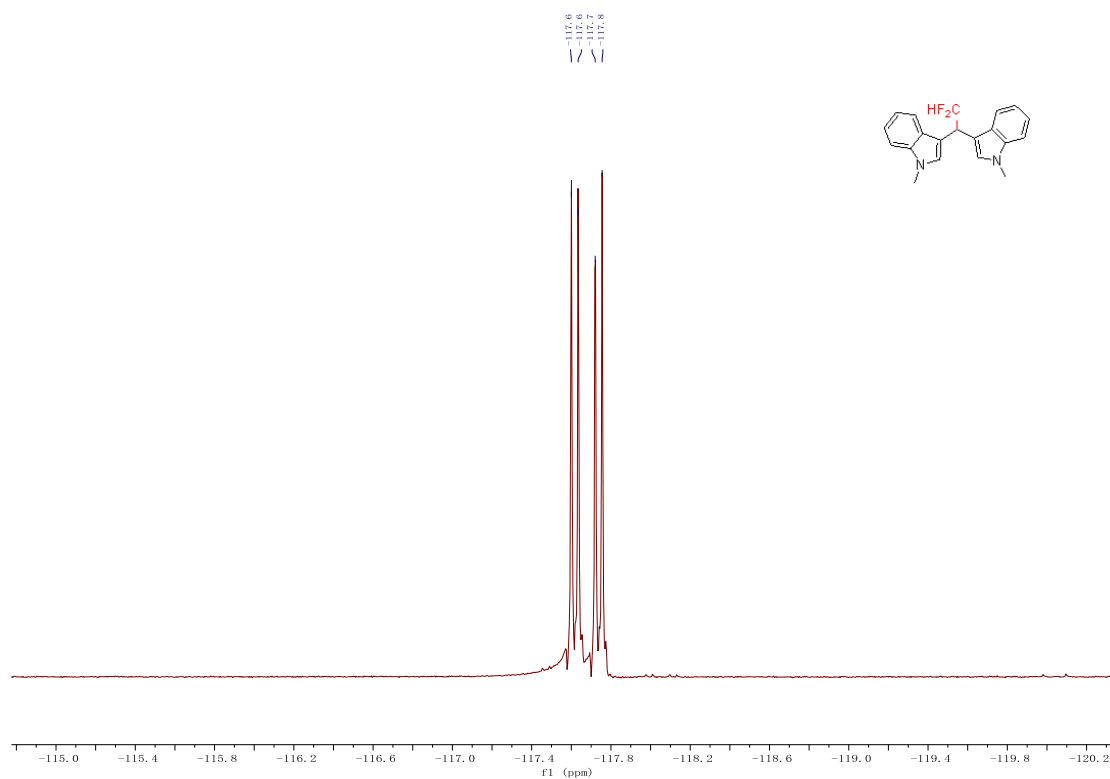

$^1\text{H}$  NMR (500 MHz, Methanol- $d_4$ ) spectra of **4c**

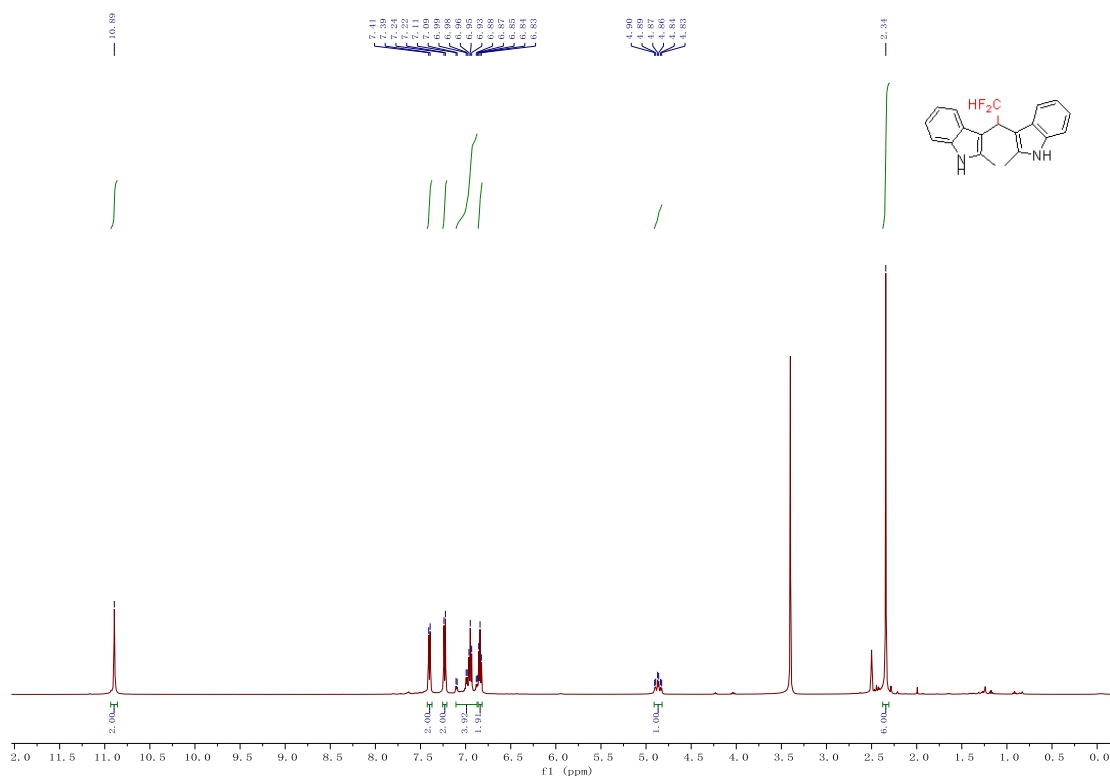

$^{13}\text{C}$  NMR (125 MHz, Methanol- $d_4$ ) spectra of **4c**

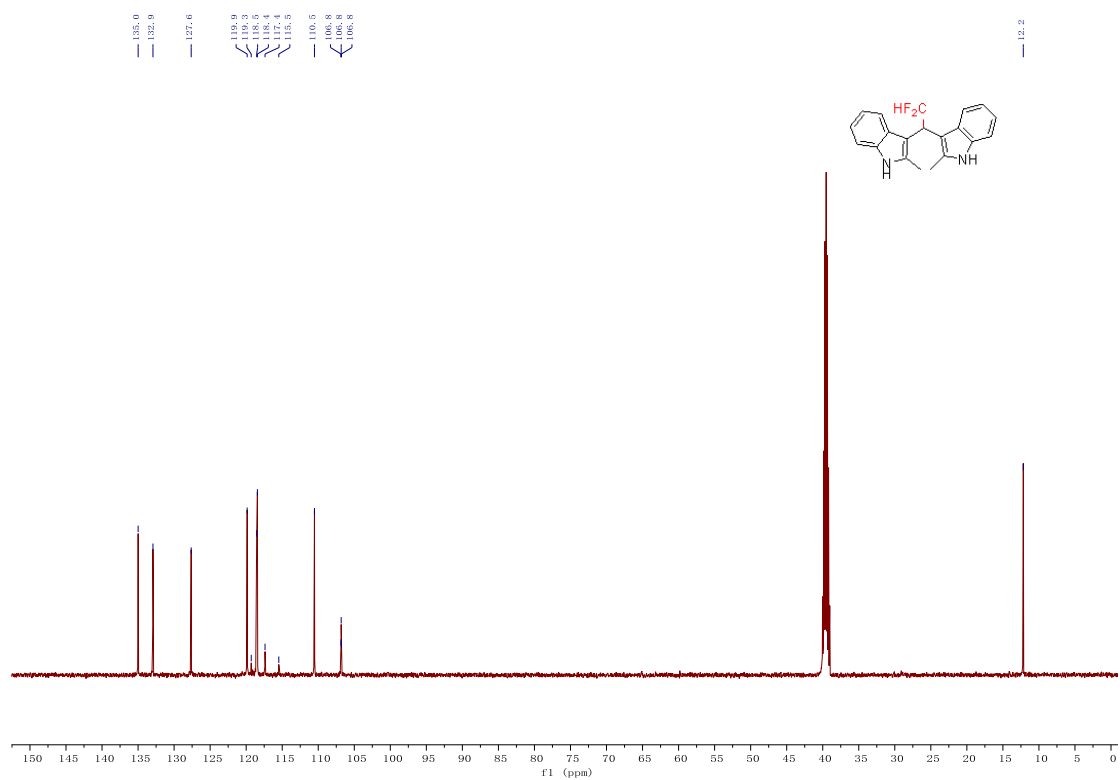

$^{19}\text{F}$  NMR (470 MHz, Methanol- $d_4$ ) spectra of **4c**

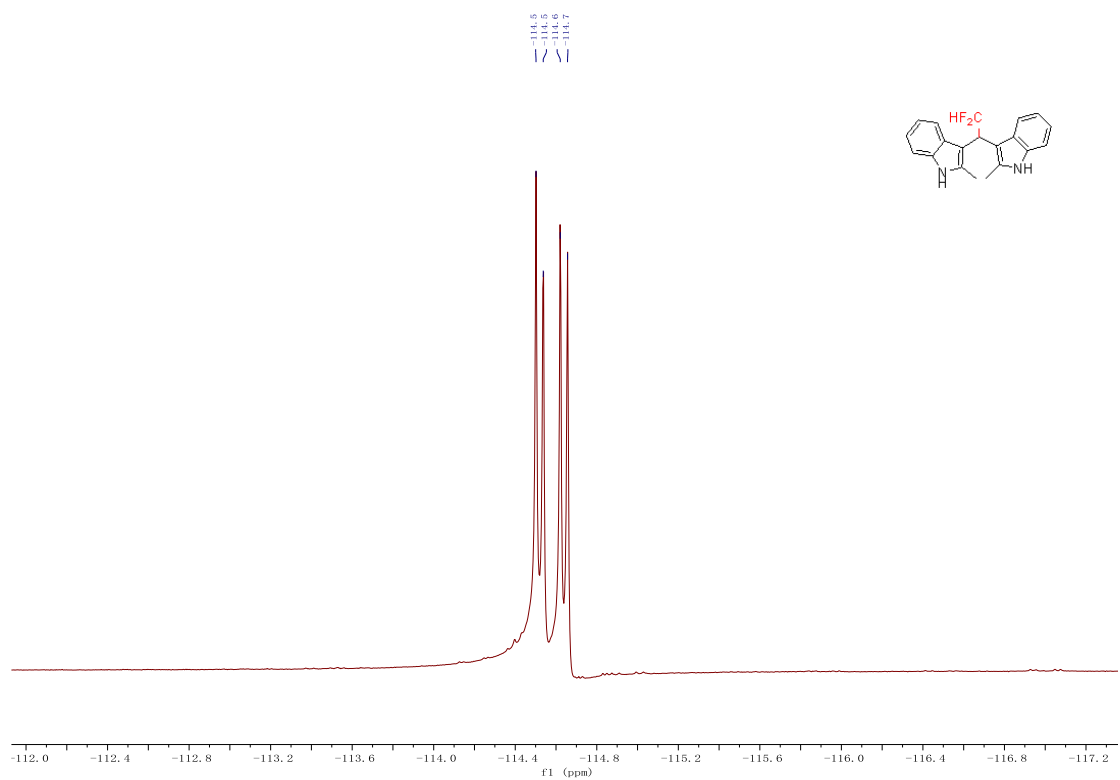

<sup>1</sup>H NMR (500 MHz, Methanol-*d*<sub>4</sub>) spectra of **4d**

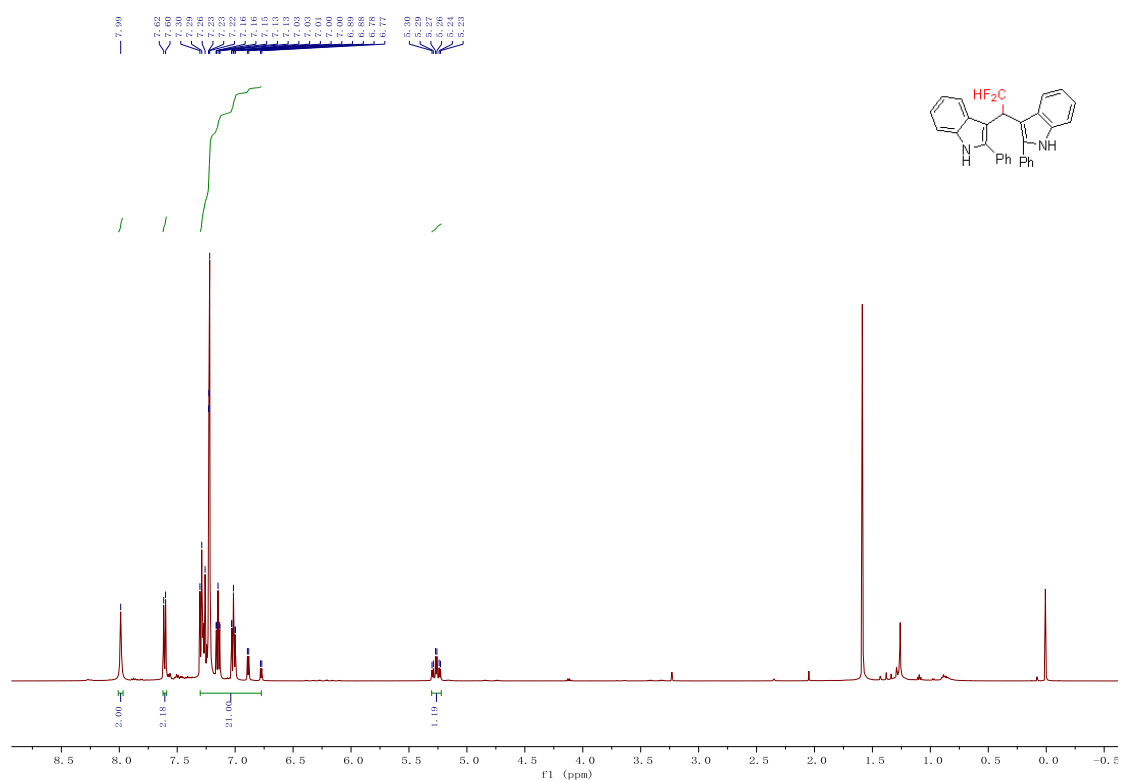

<sup>13</sup>C NMR (125 MHz, Methanol-*d*<sub>4</sub>) spectra of **4d**

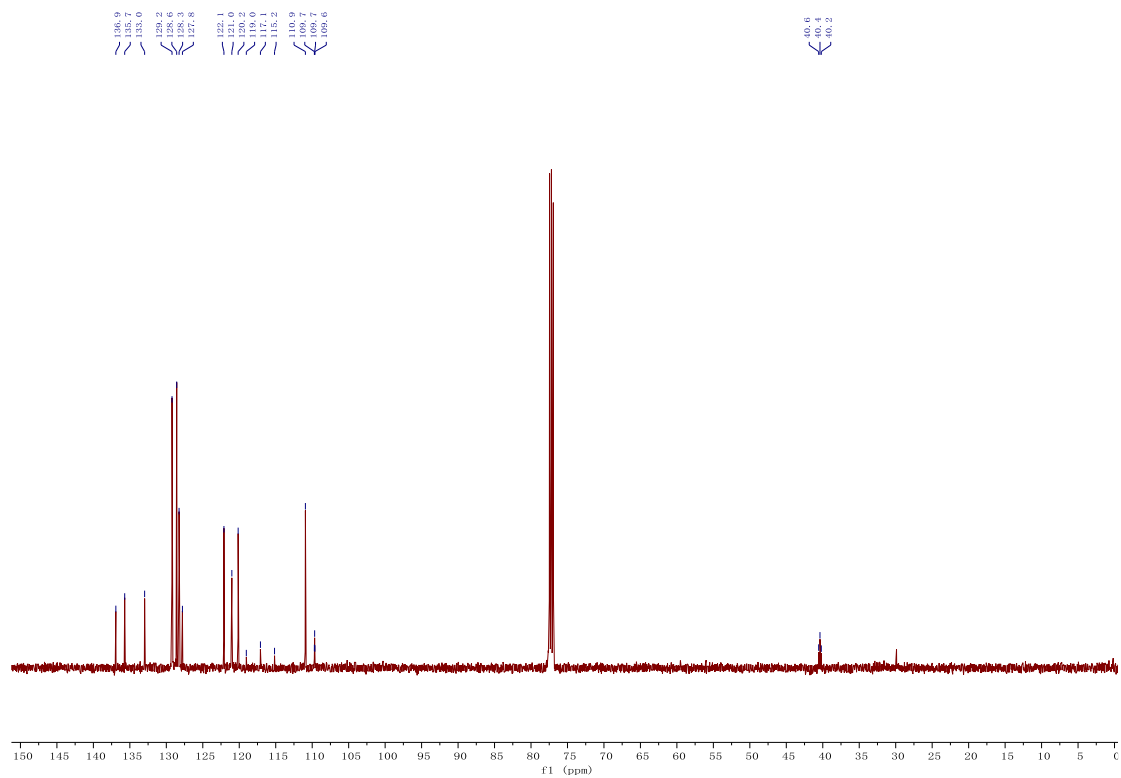

$^{19}\text{F}$  NMR (470 MHz, Methanol- $d_4$ ) spectra of **4d**

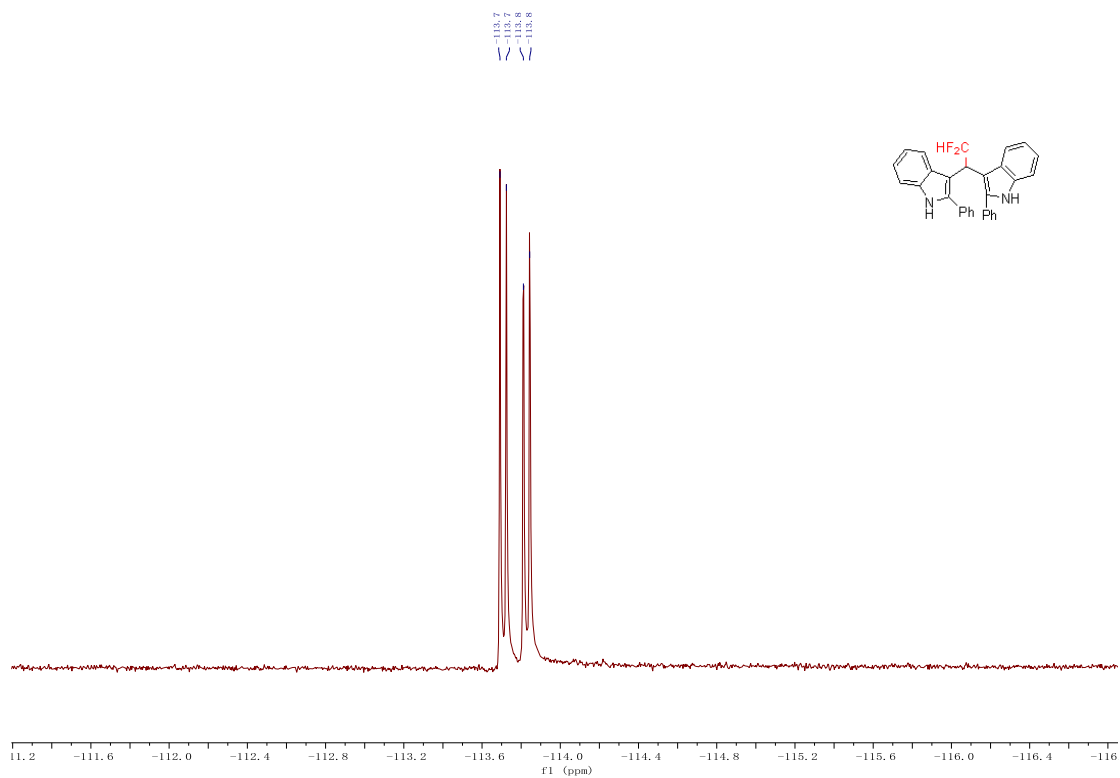

$^1\text{H}$  NMR (500 MHz, Methanol- $d_4$ ) spectra of **4e**

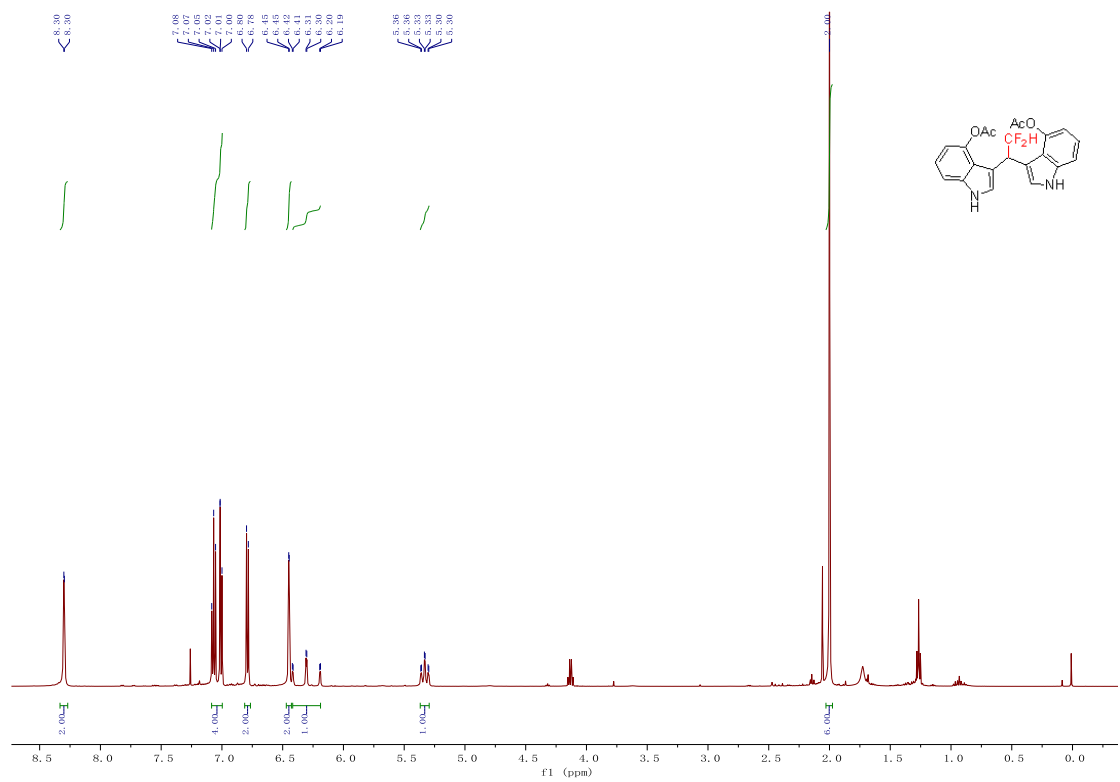

<sup>13</sup>C NMR (125 MHz, Methanol-d<sub>4</sub>) spectra of **4e**

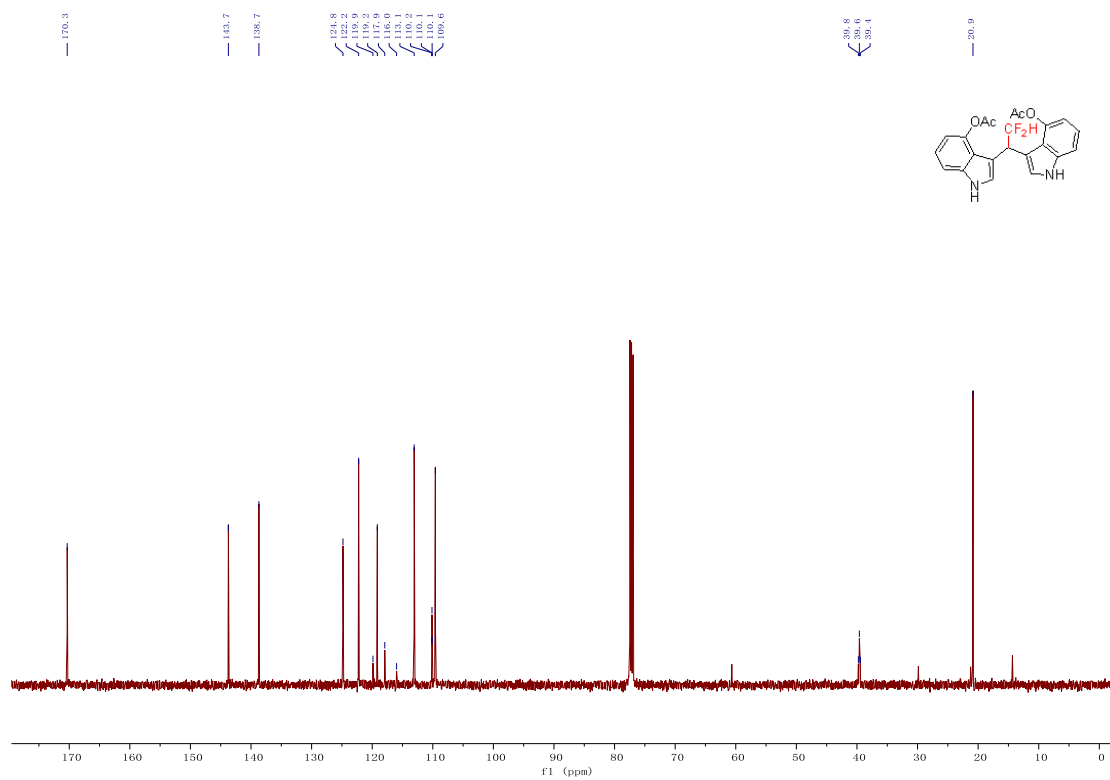

<sup>19</sup>F NMR (470 MHz, Methanol-d<sub>4</sub>) spectra of **4e**

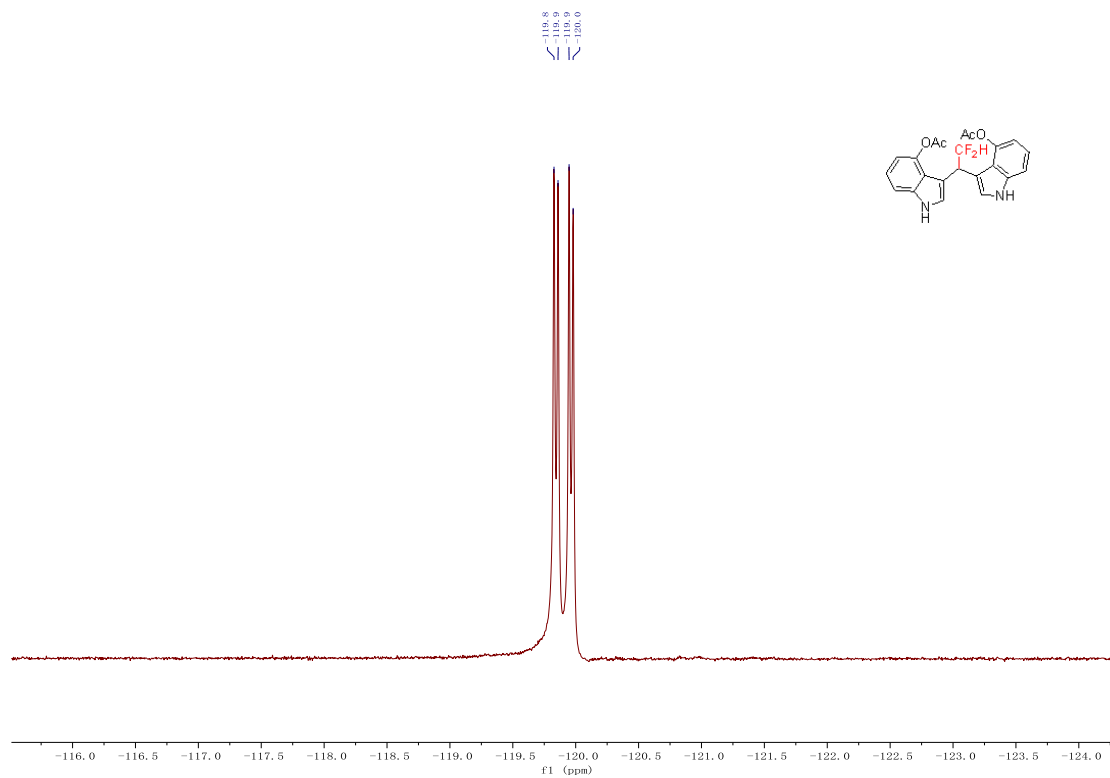



$^1\text{H}$  NMR (500 MHz, Methanol- $d_4$ ) spectra of **4f**

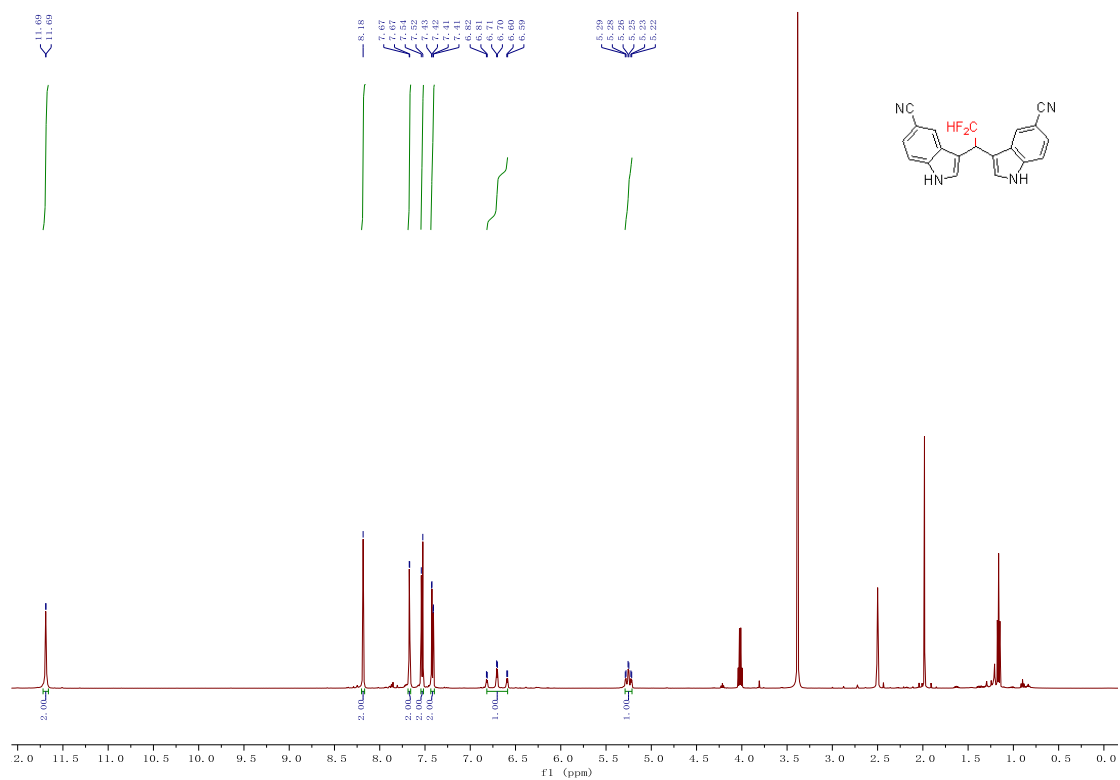

$^{13}\text{C}$  NMR (125 MHz, Methanol- $d_4$ ) spectra of **4f**

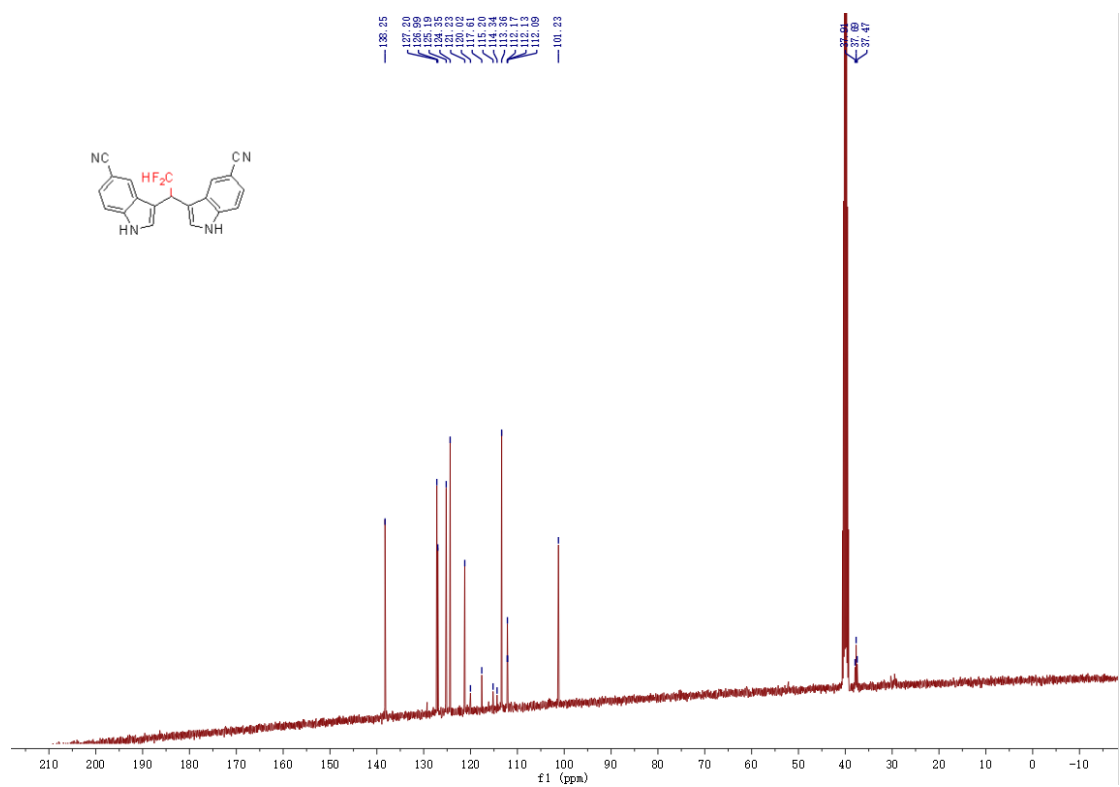

<sup>19</sup>F NMR (470 MHz, Methanol-*d*<sub>4</sub>) spectra of **4f**

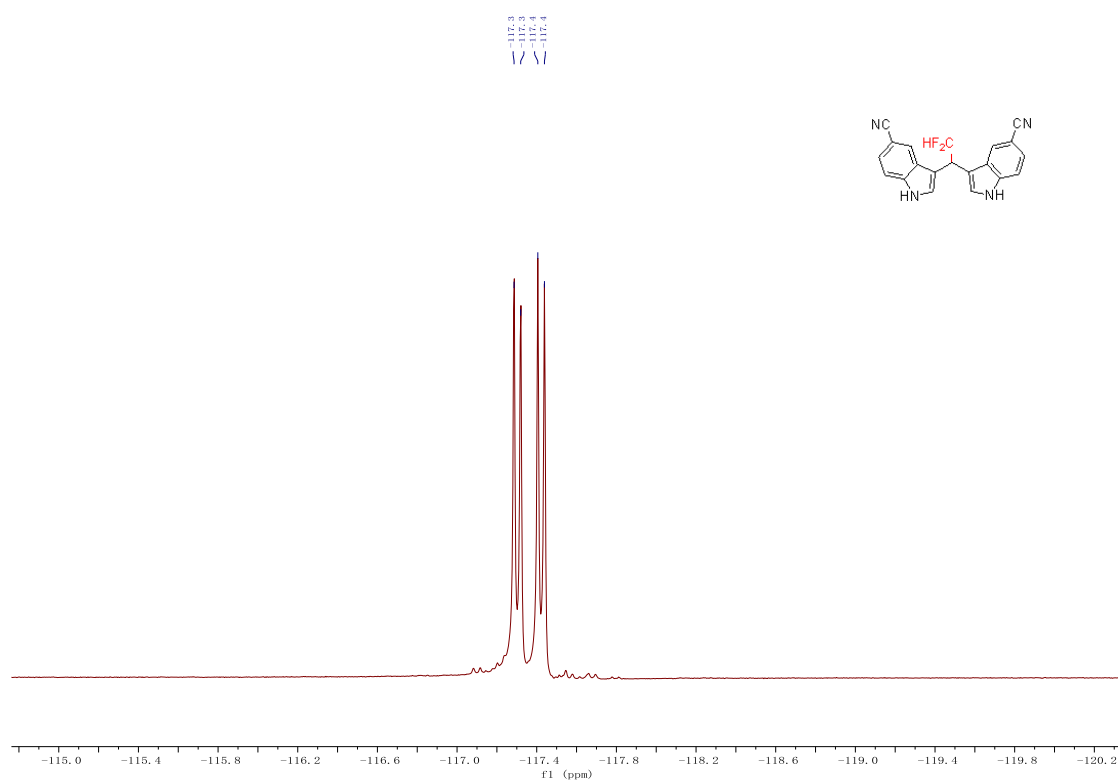

<sup>1</sup>H NMR (500 MHz, Methanol-*d*<sub>4</sub>) spectra of **4g**

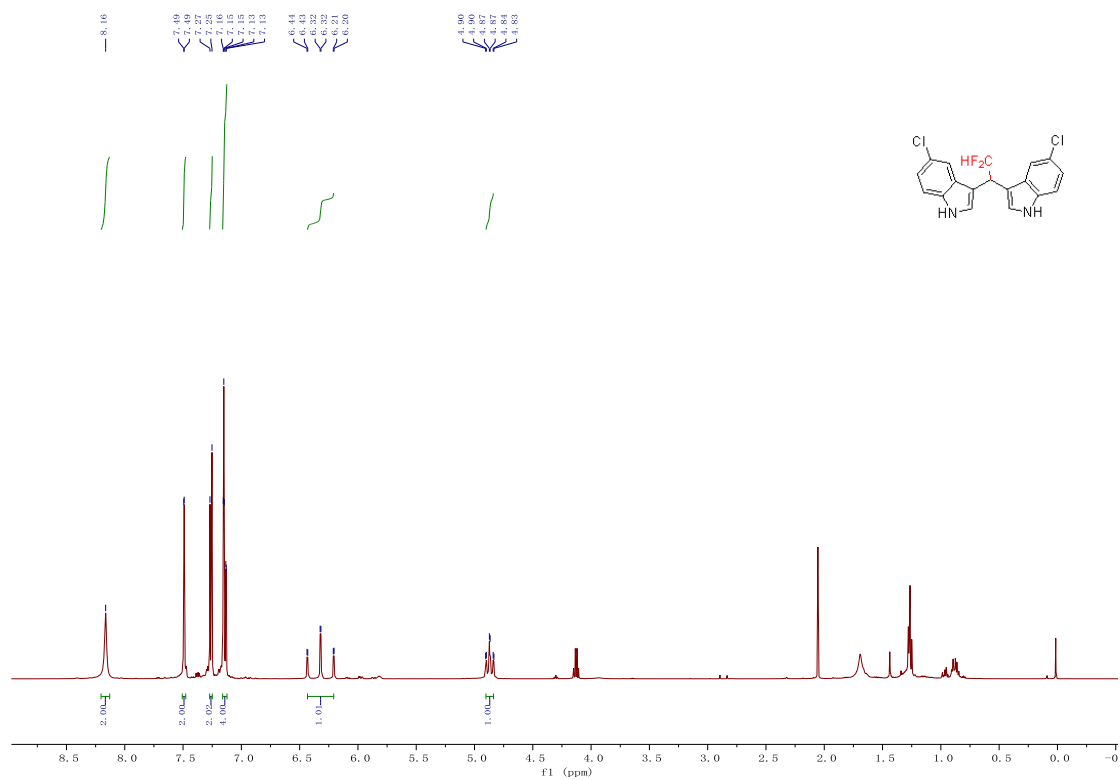

$^{13}\text{C}$  NMR (125 MHz, Methanol- $d_4$ ) spectra of **4g**

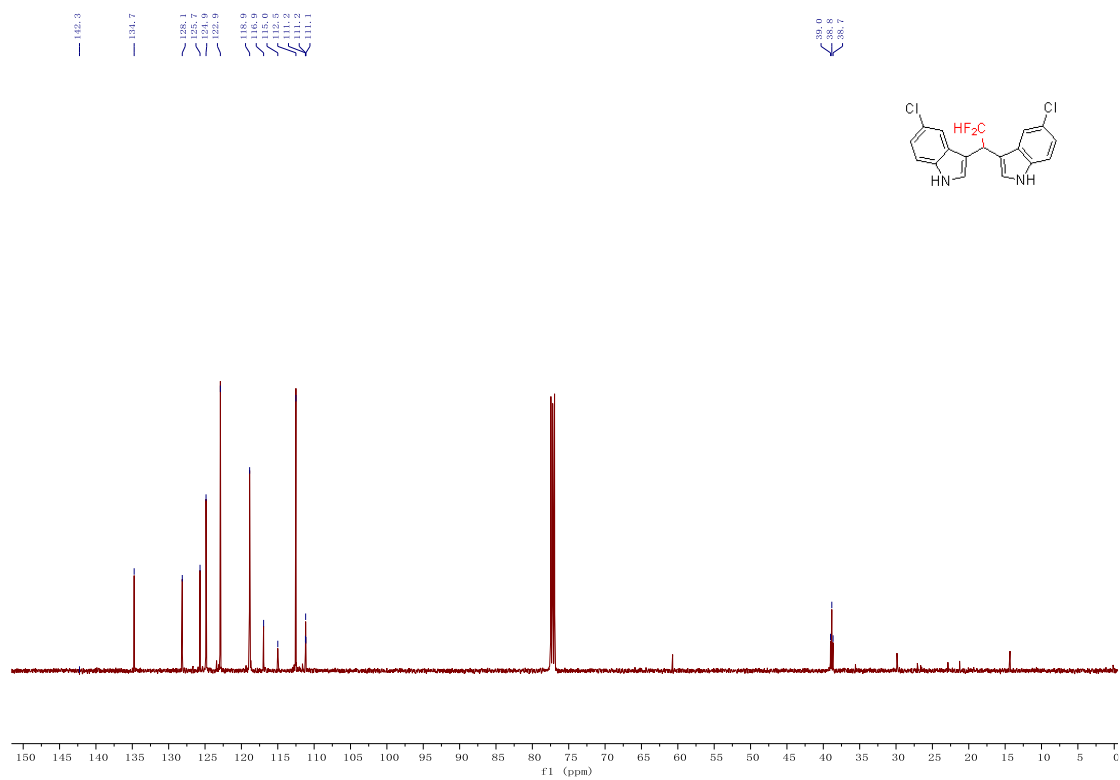

$^{19}\text{F}$  NMR (470 MHz, Methanol- $d_4$ ) spectra of **4g**

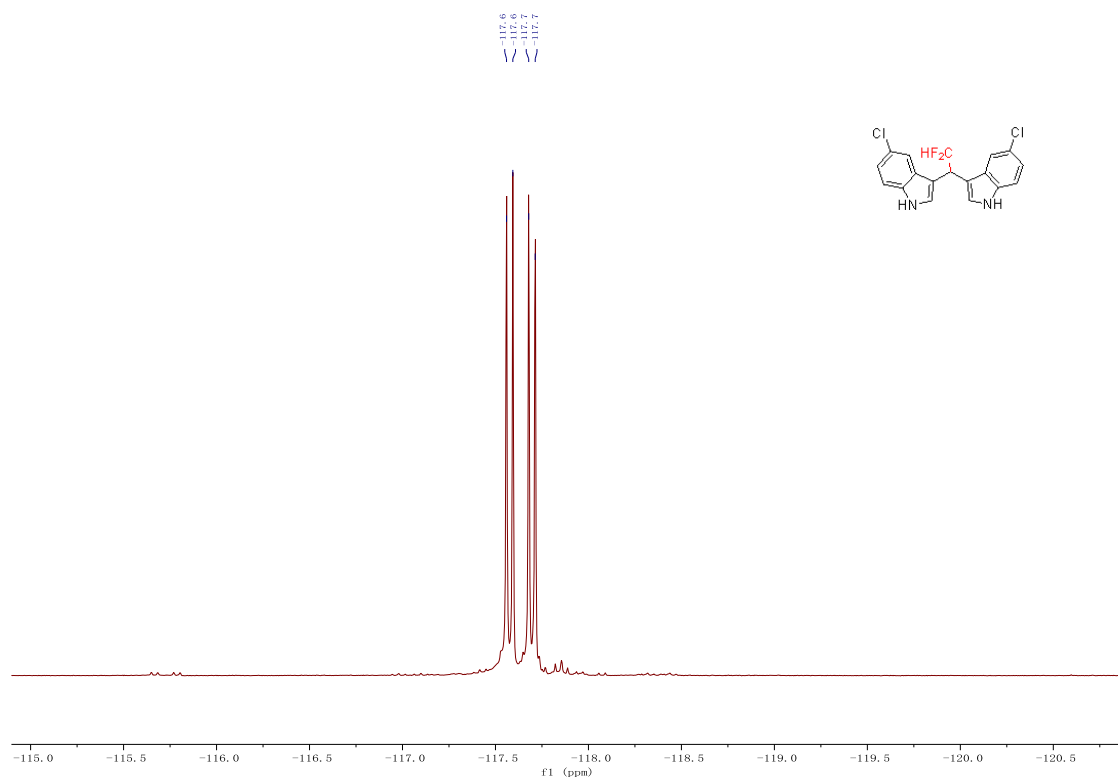

<sup>1</sup>H NMR (500 MHz, Methanol-*d*<sub>4</sub>) spectra of **4h**

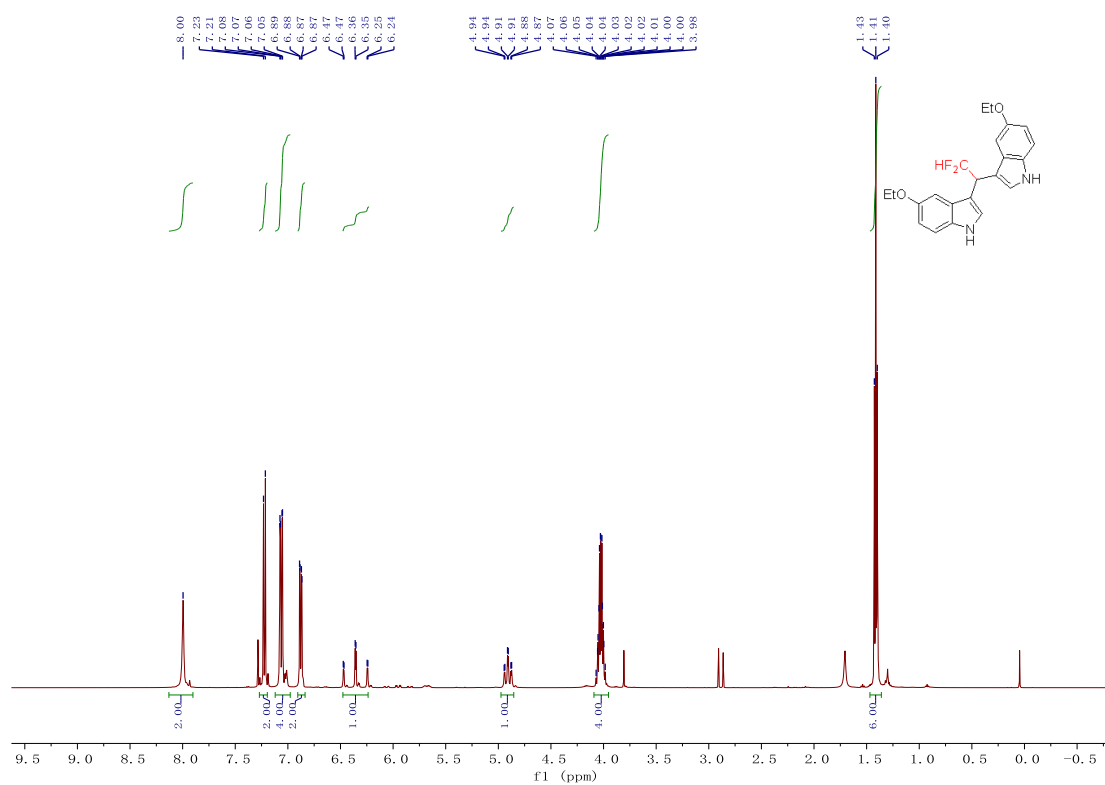

<sup>13</sup>C NMR (125 MHz, Methanol-*d*<sub>4</sub>) spectra of **4h**

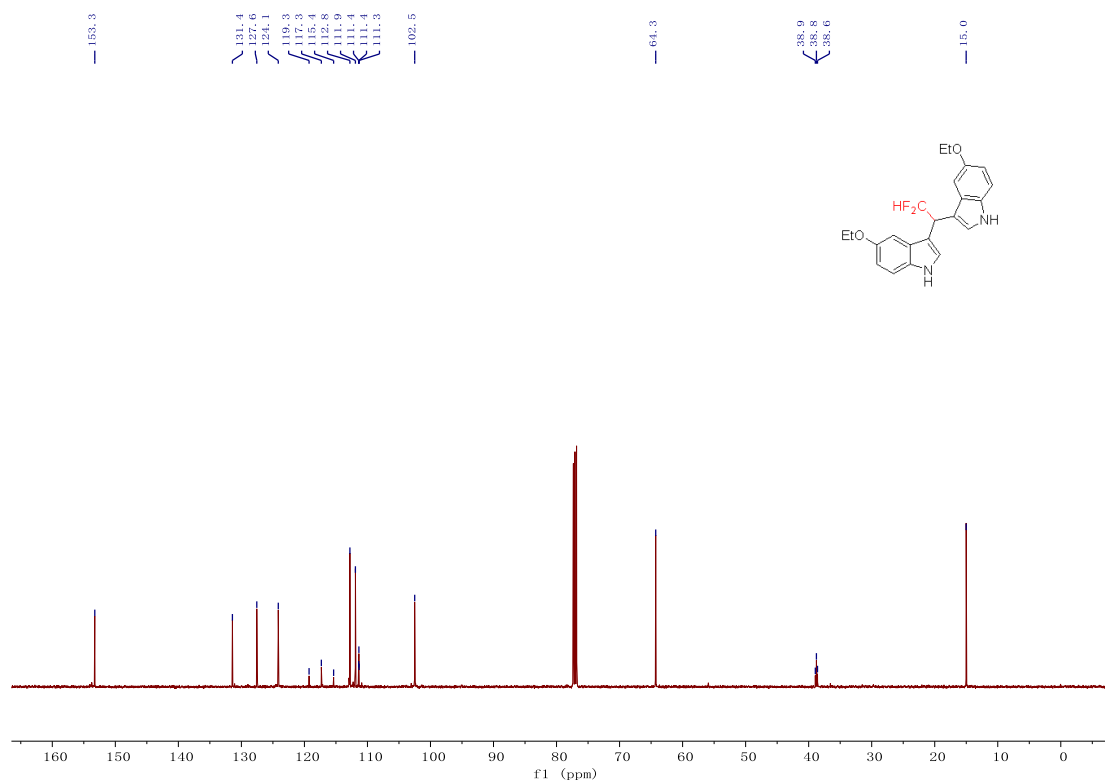

<sup>19</sup>F NMR (470 MHz, Methanol-*d*<sub>4</sub>) spectra of **4h**

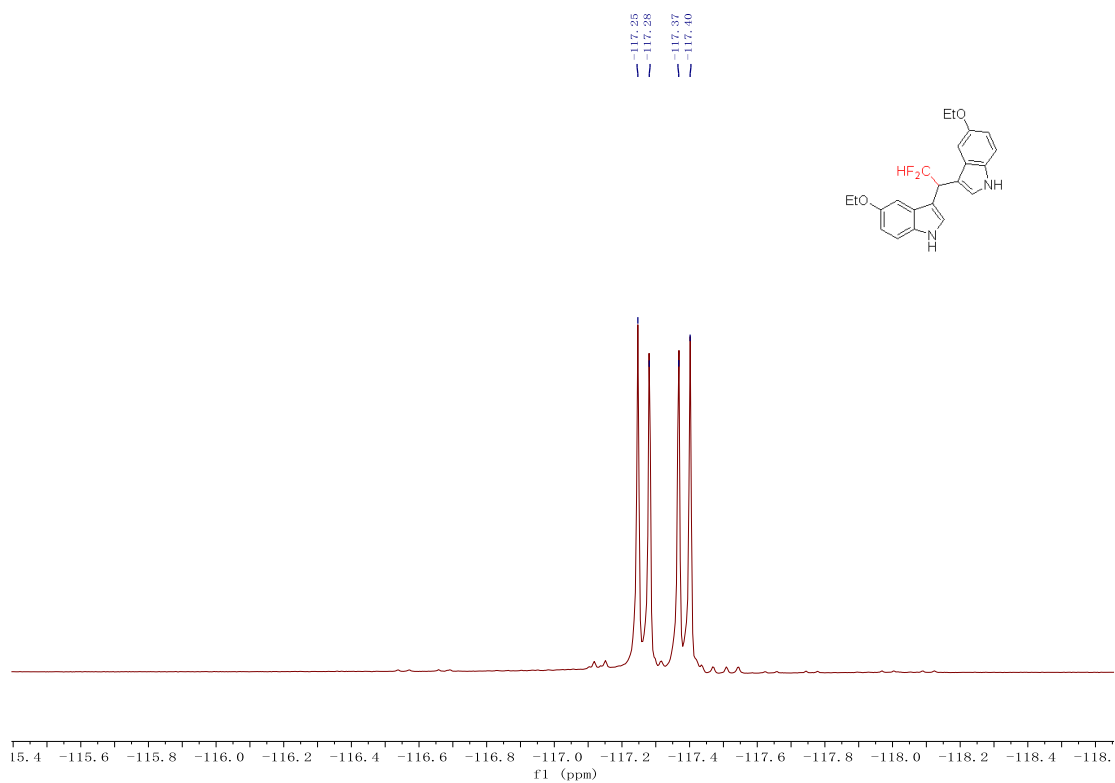

<sup>1</sup>H NMR (500 MHz, Methanol-*d*<sub>4</sub>) spectra of **4i**

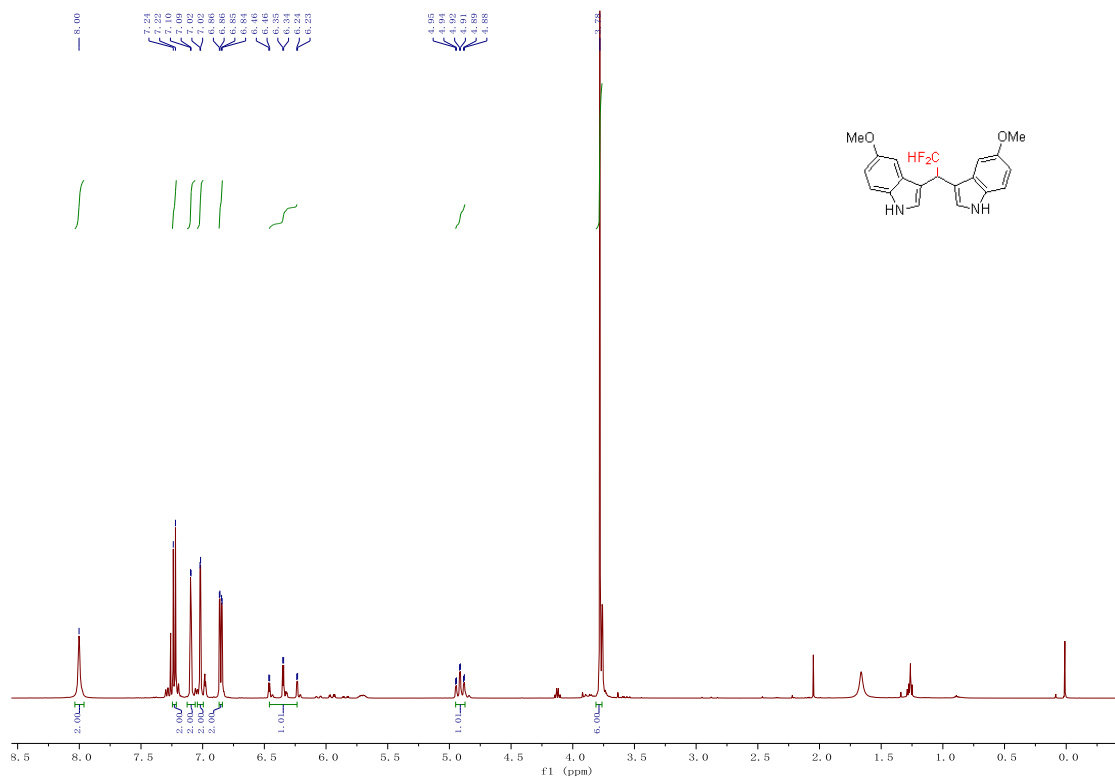

### $^{13}\text{C}$ NMR (125 MHz, Methanol- $d_4$ ) spectra of **4i**

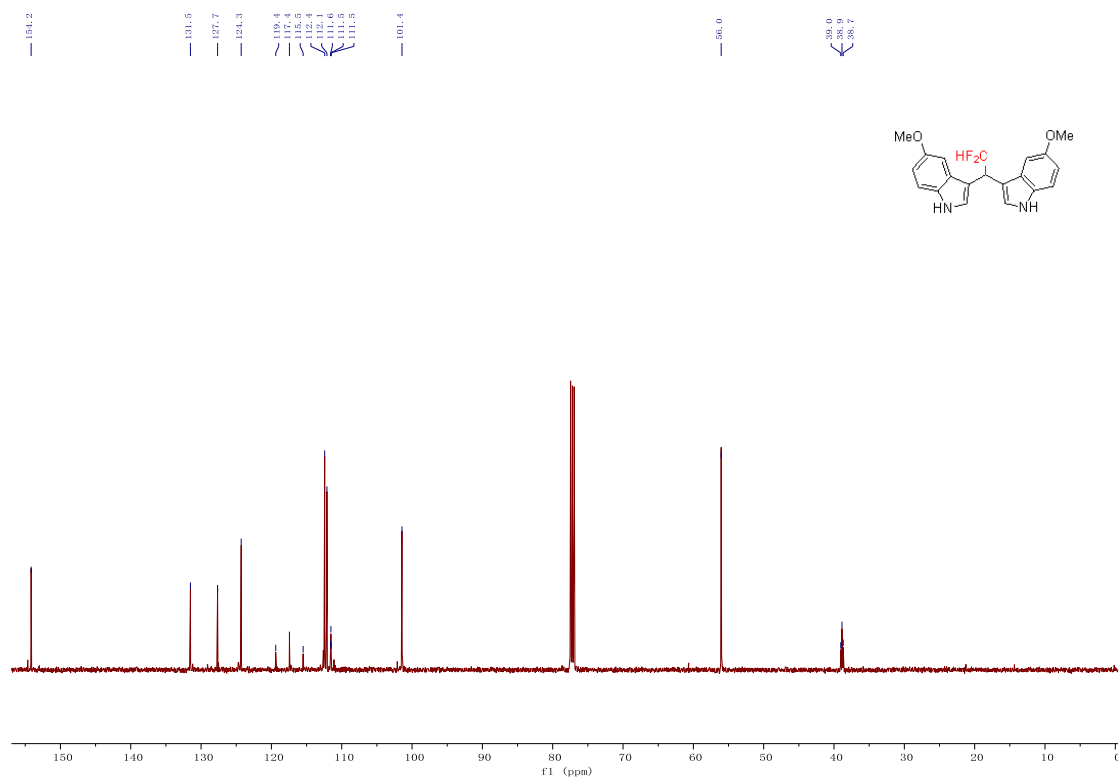

### $^{19}\text{F}$ NMR (470 MHz, Methanol- $d_4$ ) spectra of **4i**

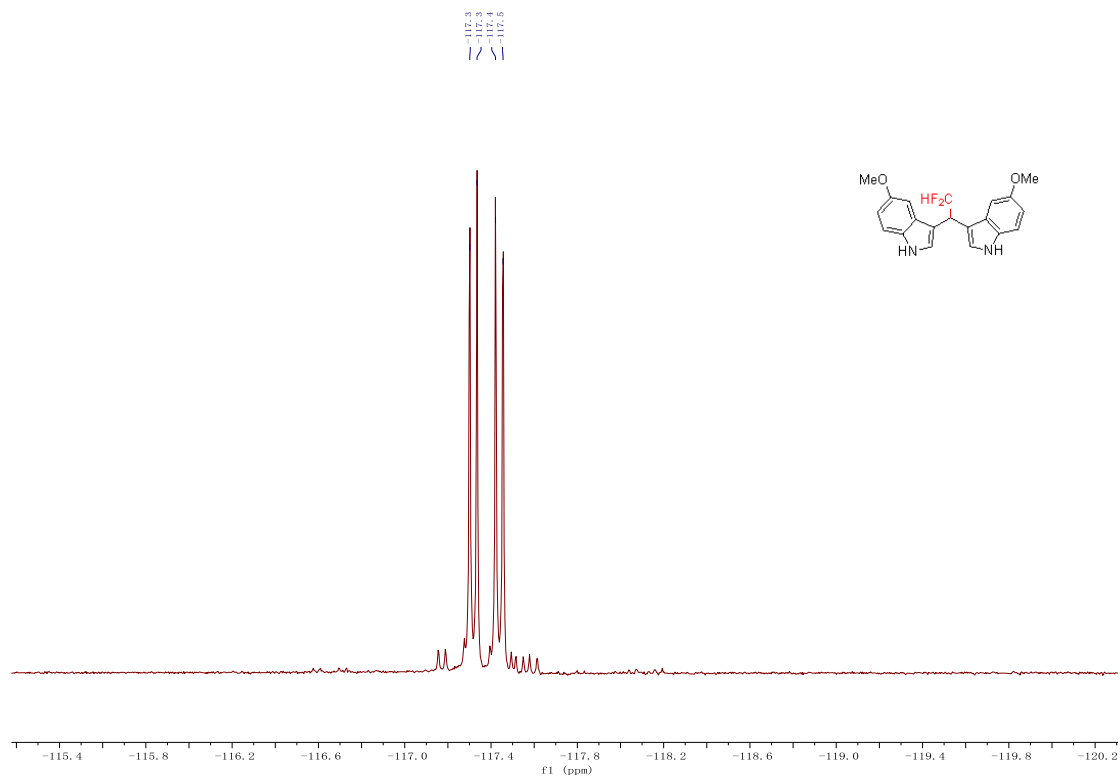

<sup>1</sup>H NMR (500 MHz, Methanol-*d*<sub>4</sub>) spectra of **4j**

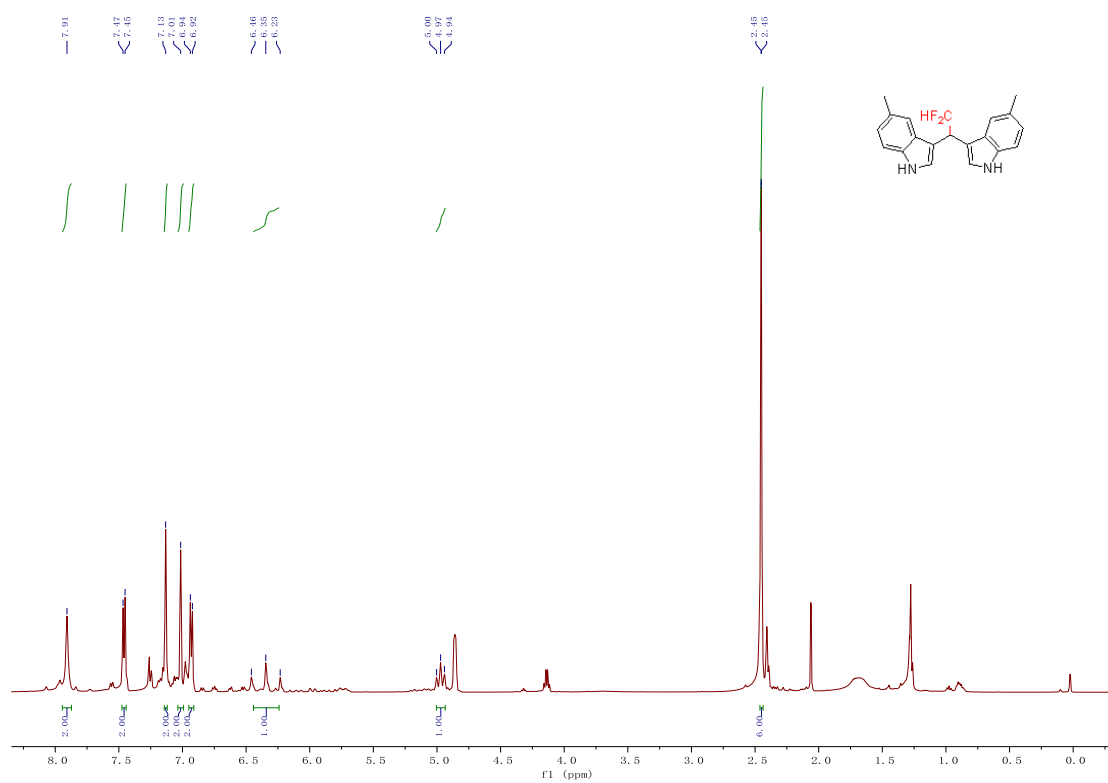

<sup>13</sup>C NMR (125 MHz, Methanol-*d*<sub>4</sub>) spectra of **4j**

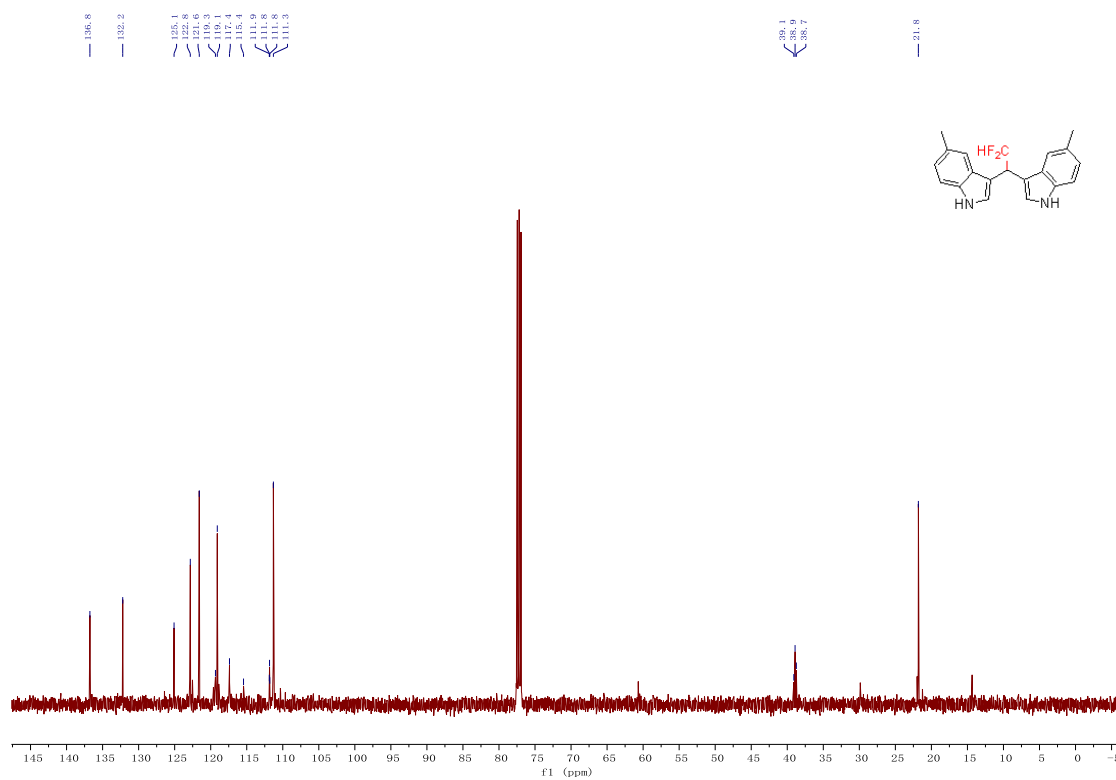

$^{19}\text{F}$  NMR (470 MHz, Methanol- $d_4$ ) spectra of **4j**

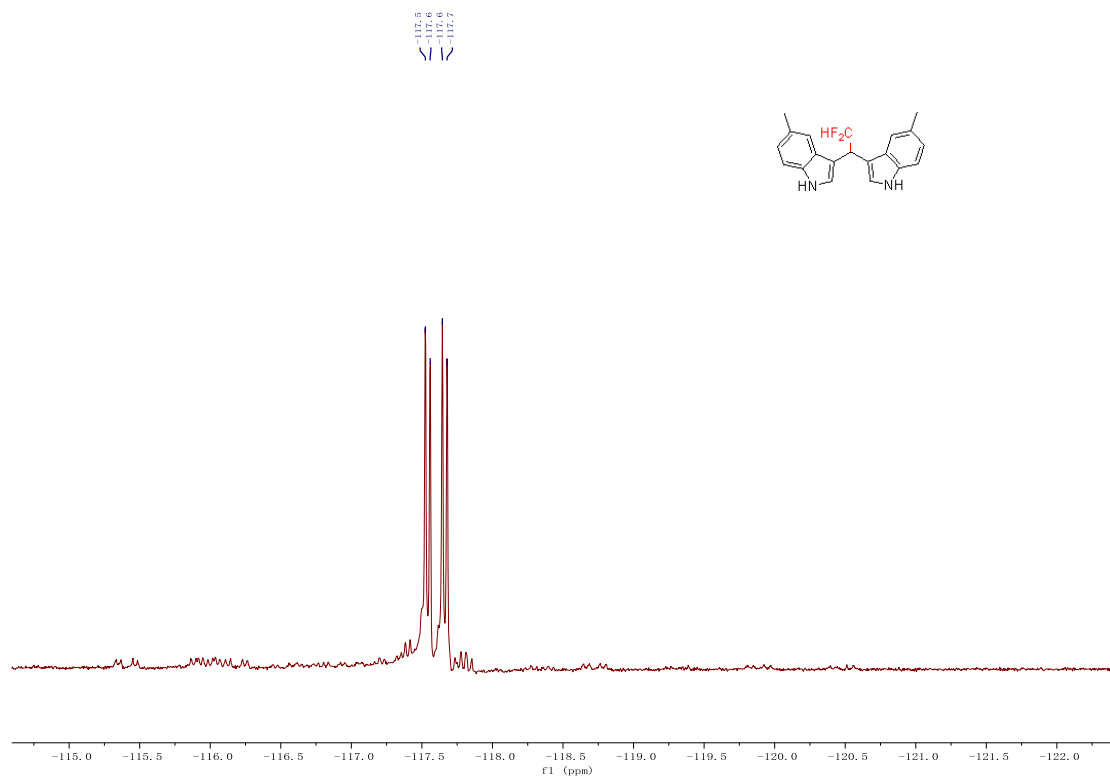

$^1\text{H}$  NMR (500 MHz, Methanol- $d_4$ ) spectra of **4k**

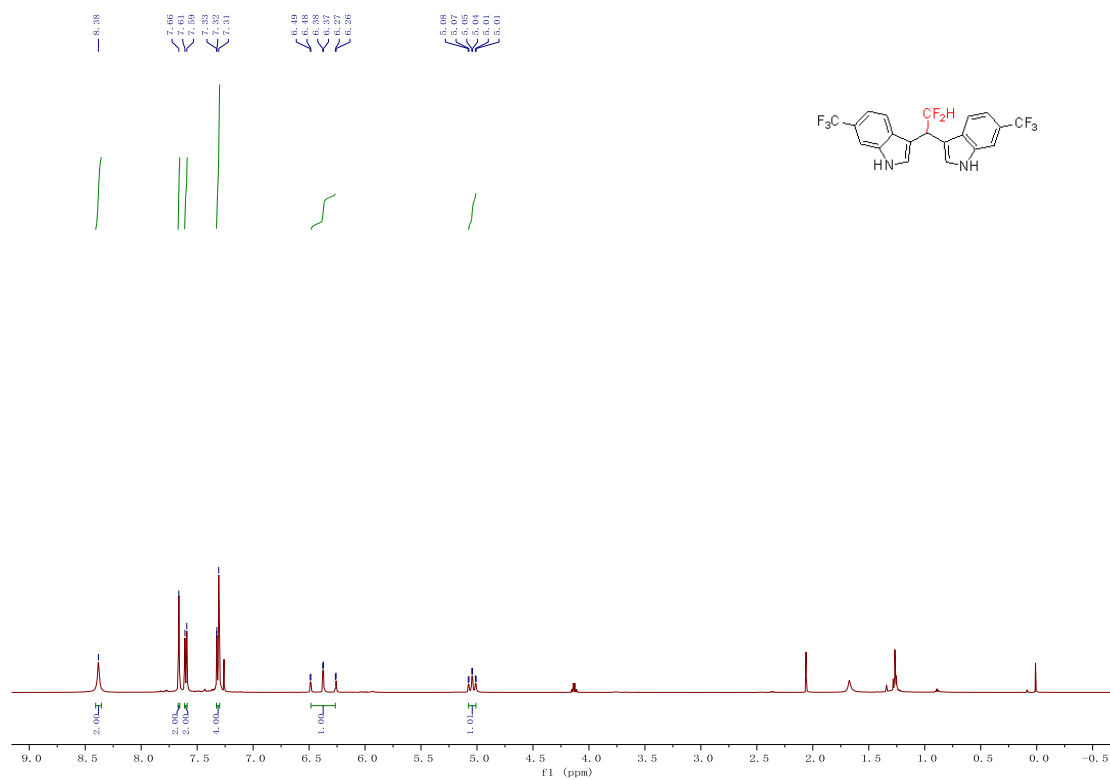





$^1\text{H}$  NMR (500 MHz, Methanol- $d_4$ ) spectra of **41**

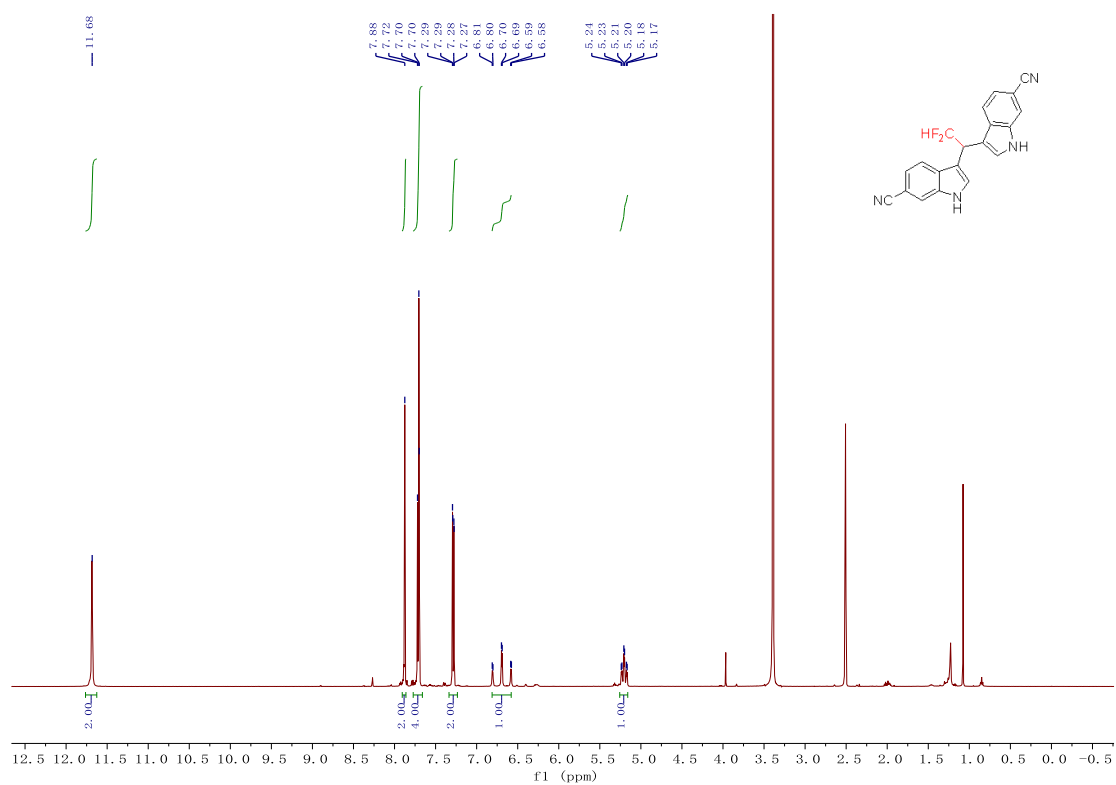

$^{13}\text{C}$  NMR (125 MHz, Methanol- $d_4$ ) spectra of **41**

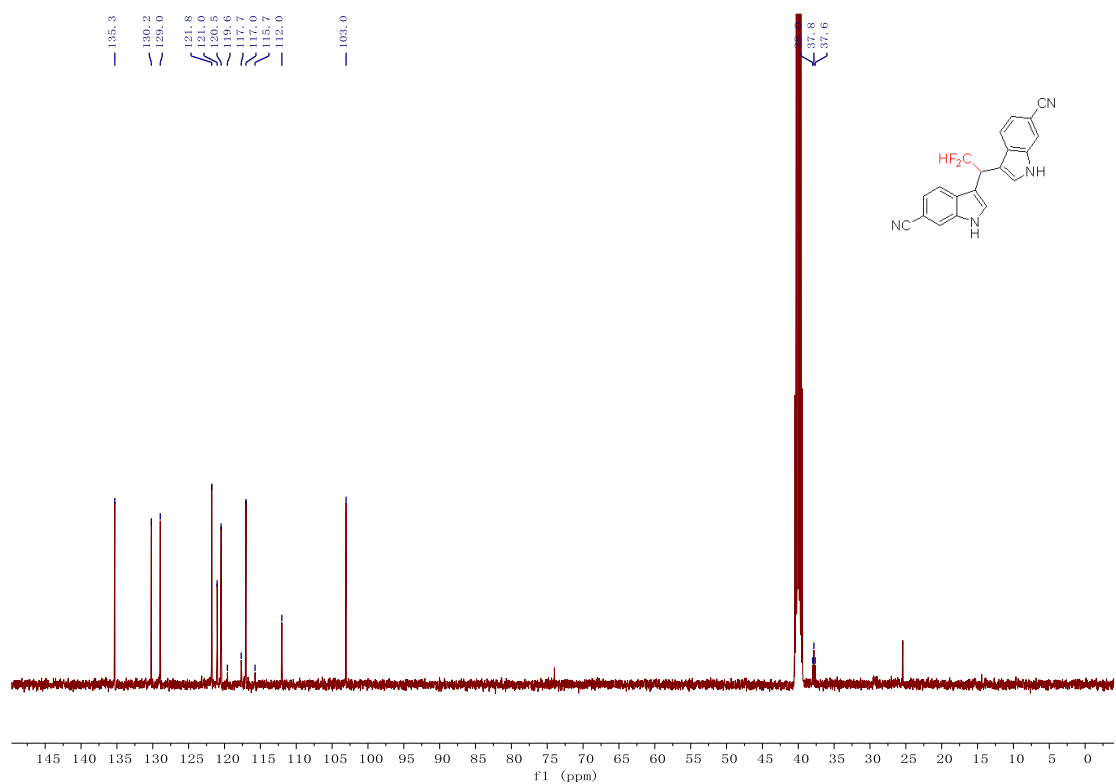

<sup>19</sup>F NMR (470 MHz, Methanol-*d*<sub>4</sub>) spectra of **4l**

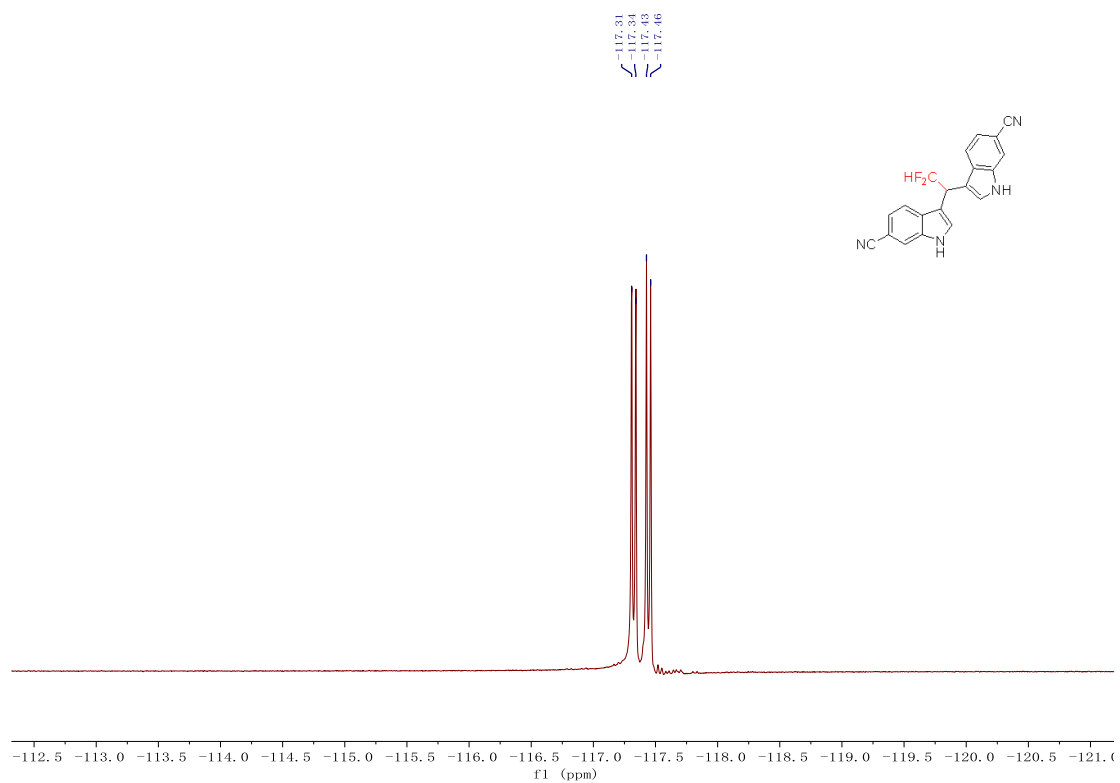

<sup>1</sup>H NMR (500 MHz, Methanol-*d*<sub>4</sub>) spectra of **4m**

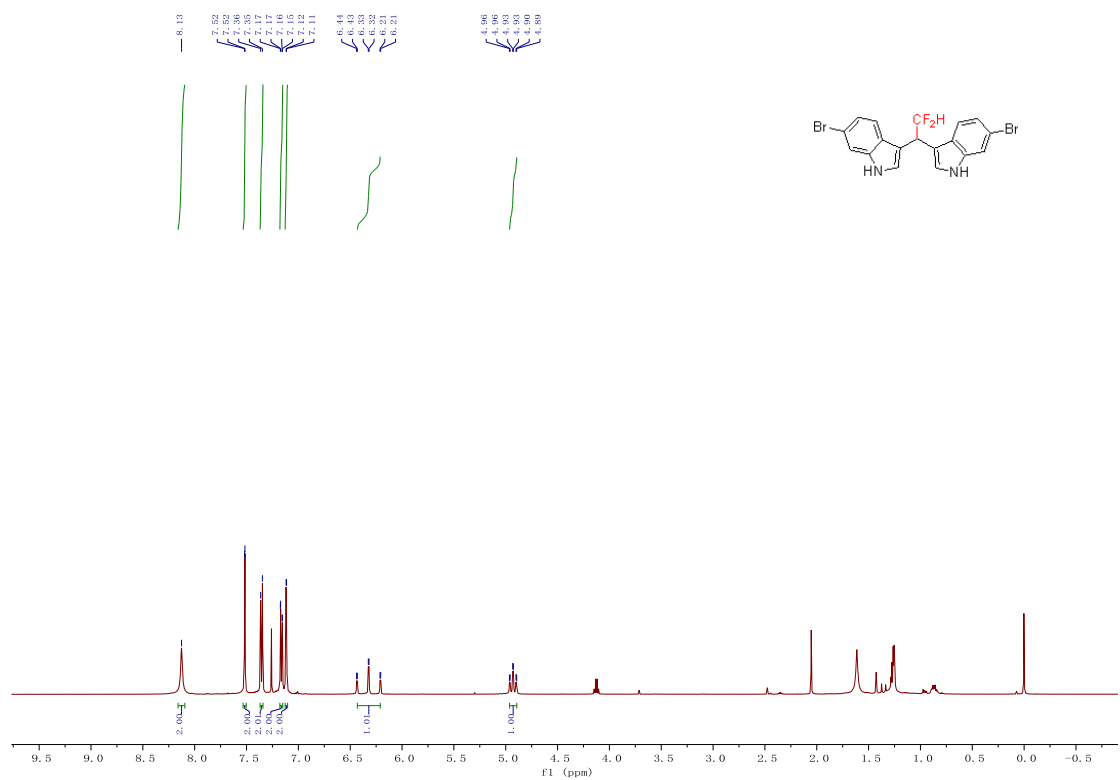



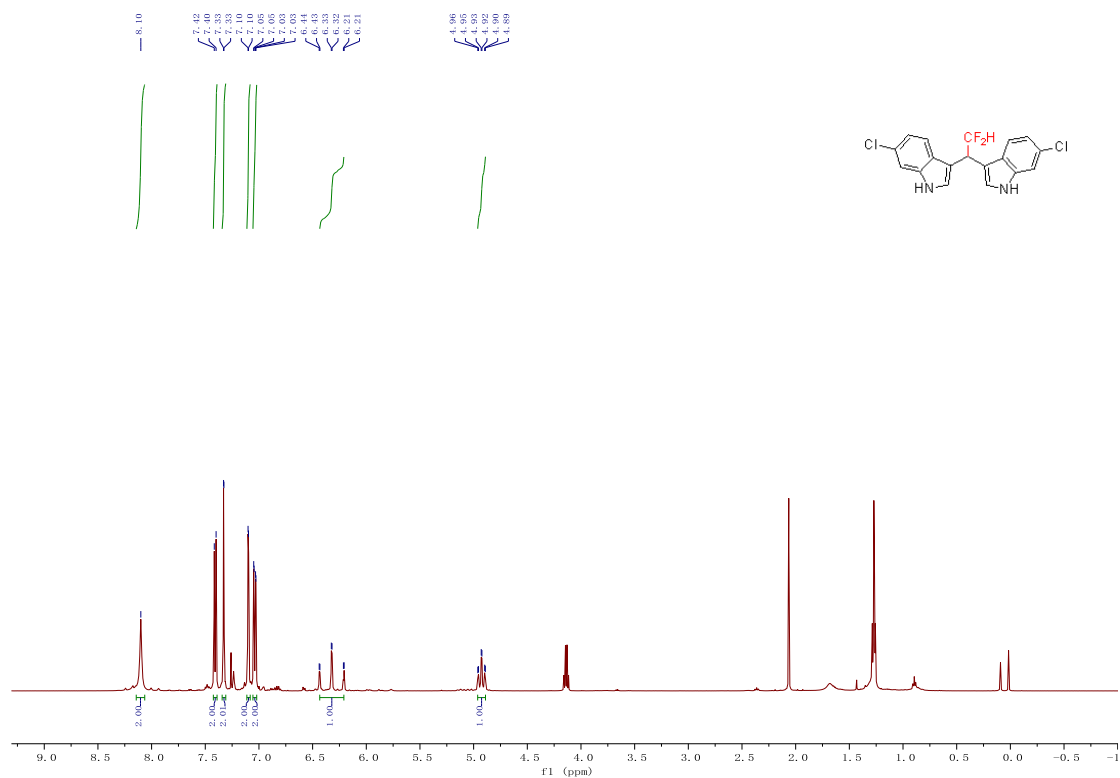

<sup>13</sup>C NMR (125 MHz, Methanol-d<sub>4</sub>) spectra of **4n**

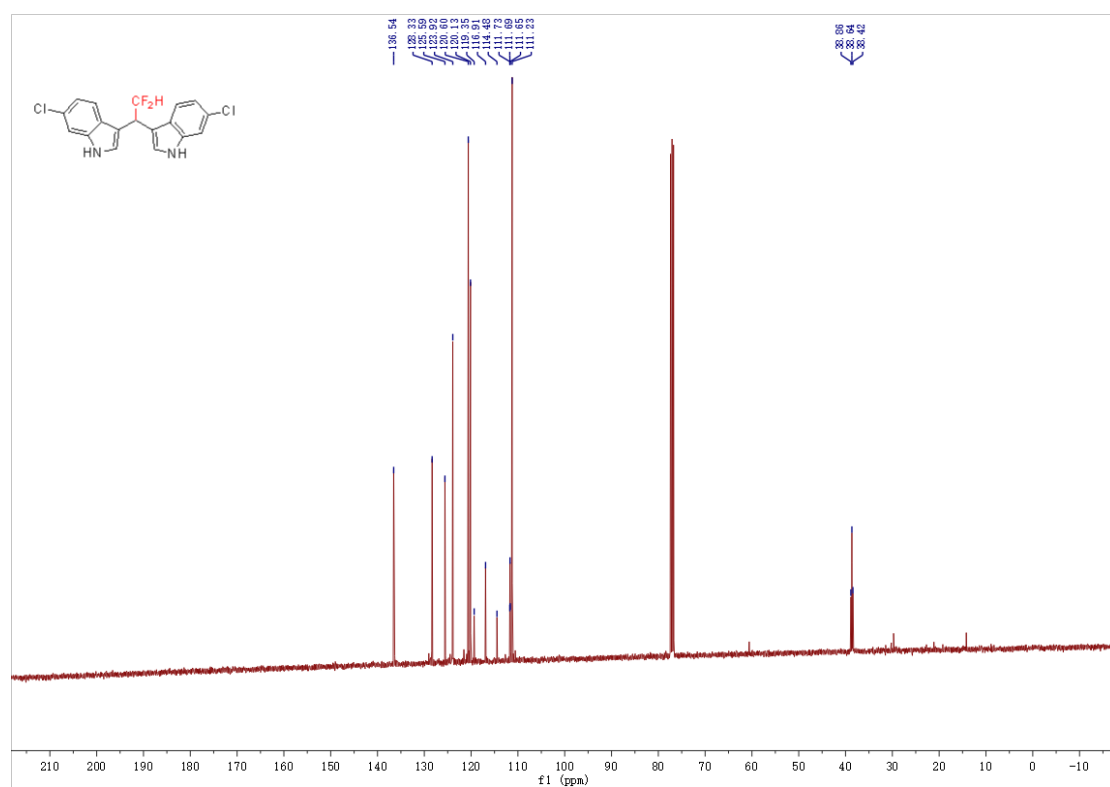

<sup>19</sup>F NMR (470 MHz, Methanol-*d*<sub>4</sub>) spectra of **4n**

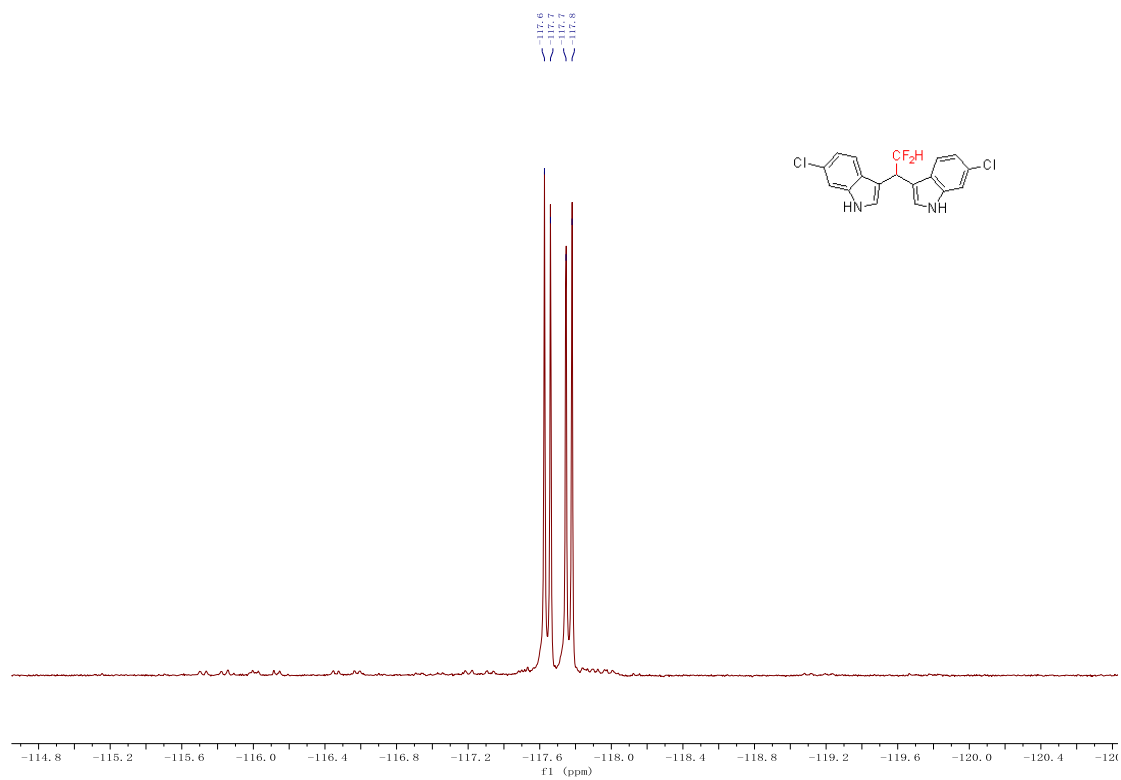

<sup>1</sup>H NMR (500 MHz, Methanol-*d*<sub>4</sub>) spectra of **4o**

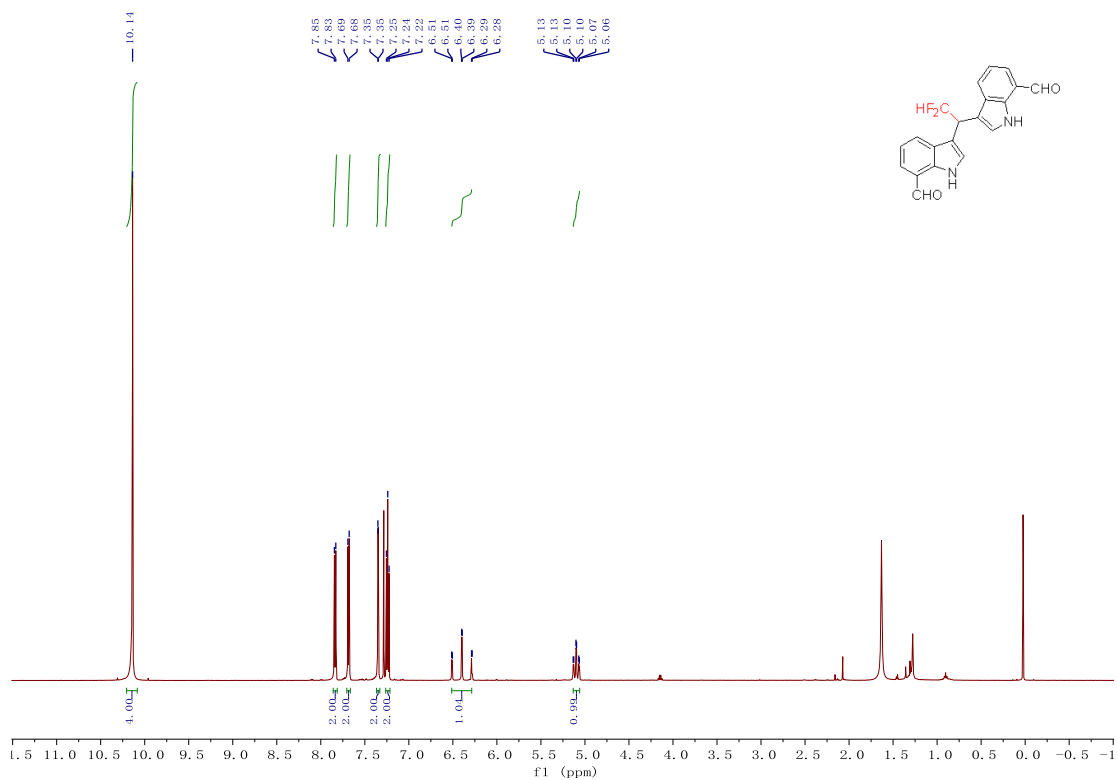

<sup>13</sup>C NMR (125 MHz, Methanol-*d*<sub>4</sub>) spectra of **4o**

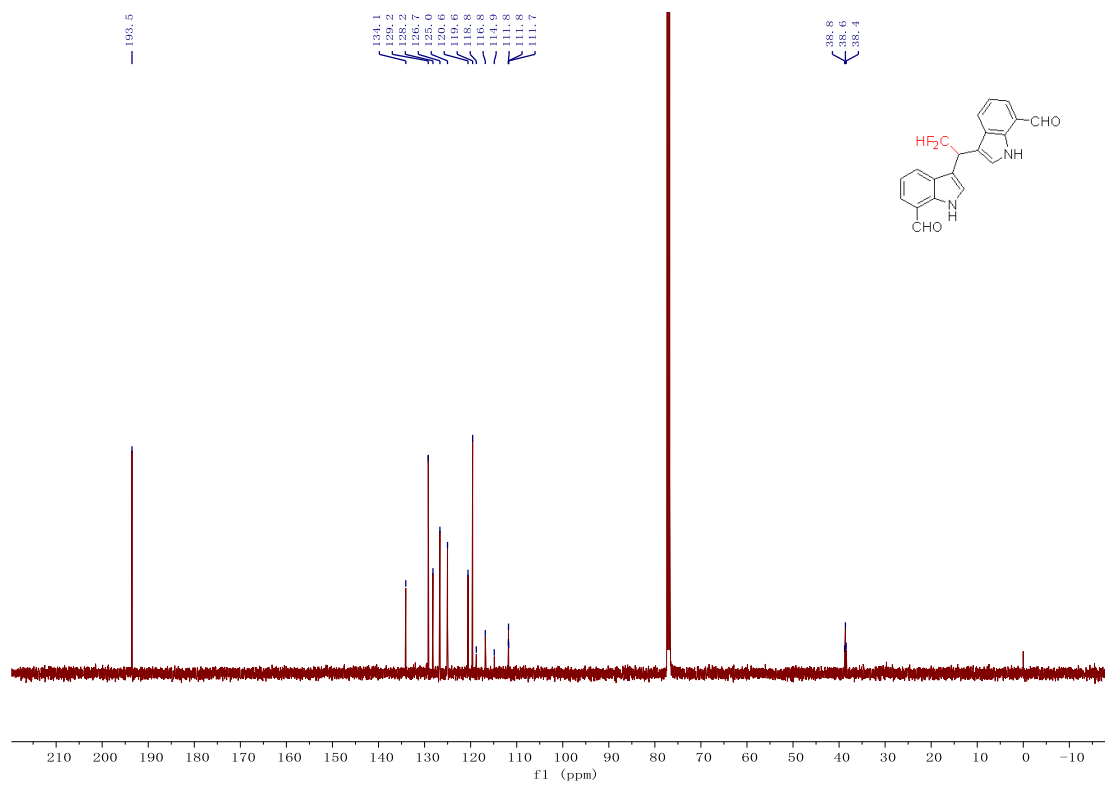

<sup>19</sup>F NMR (470 MHz, Methanol-*d*<sub>4</sub>) spectra of **4o**

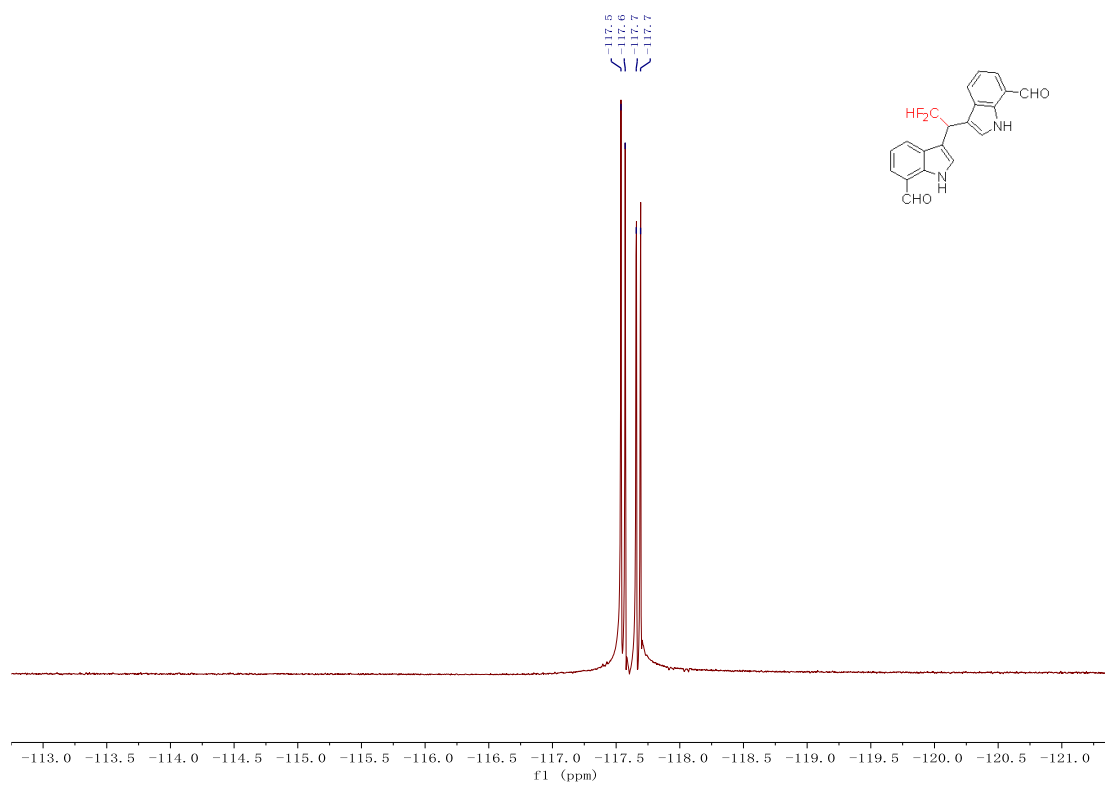

<sup>1</sup>H NMR (500 MHz, Methanol-*d*<sub>4</sub>) spectra of **4p**

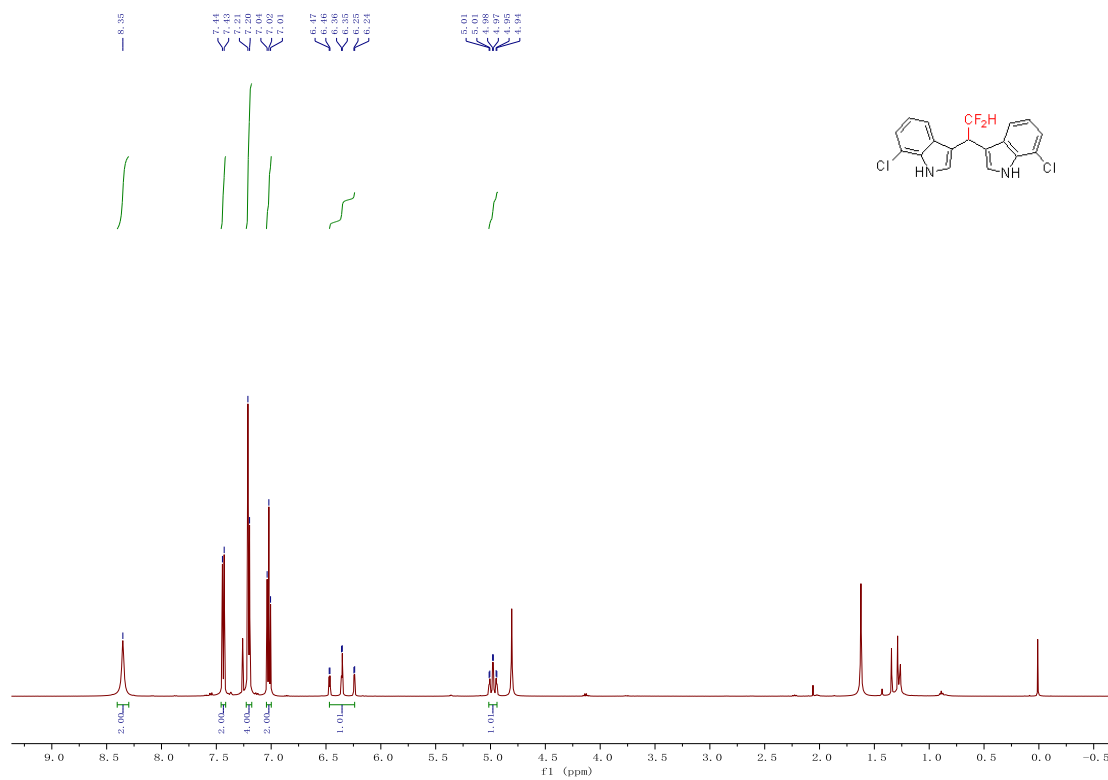

<sup>13</sup>C NMR (125 MHz, Methanol-*d*<sub>4</sub>) spectra of **4p**

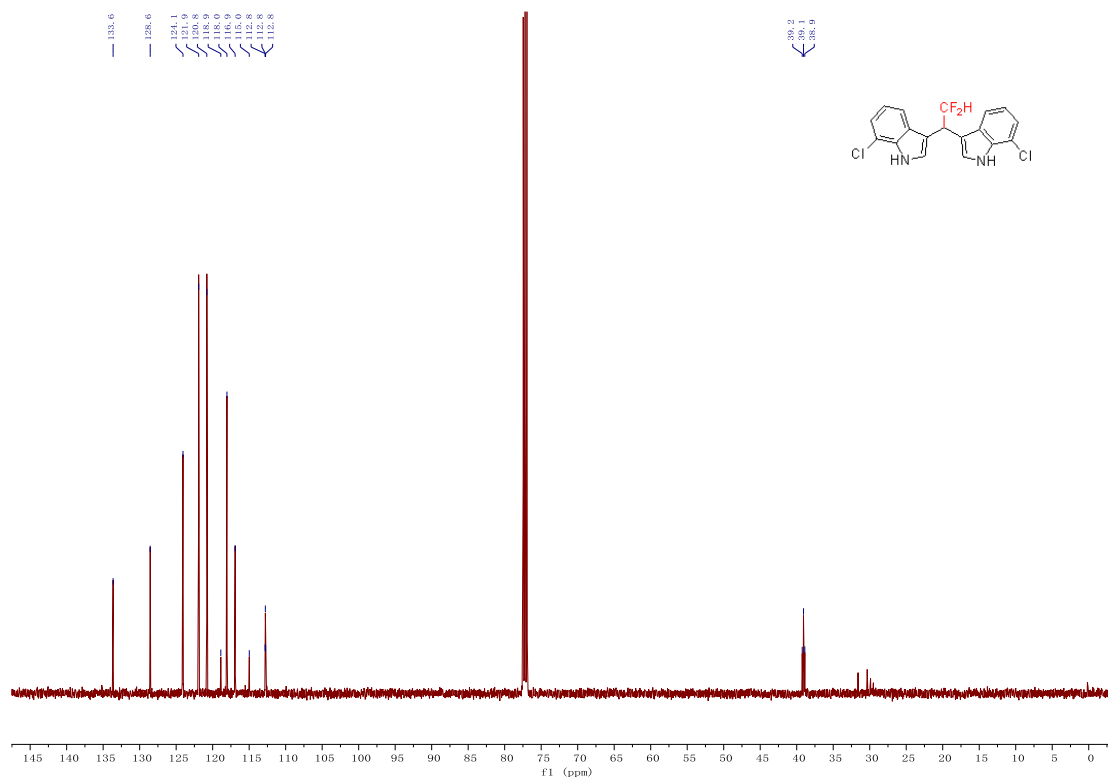



<sup>19</sup>F NMR (470 MHz, Methanol-*d*<sub>4</sub>) spectra of **4p**

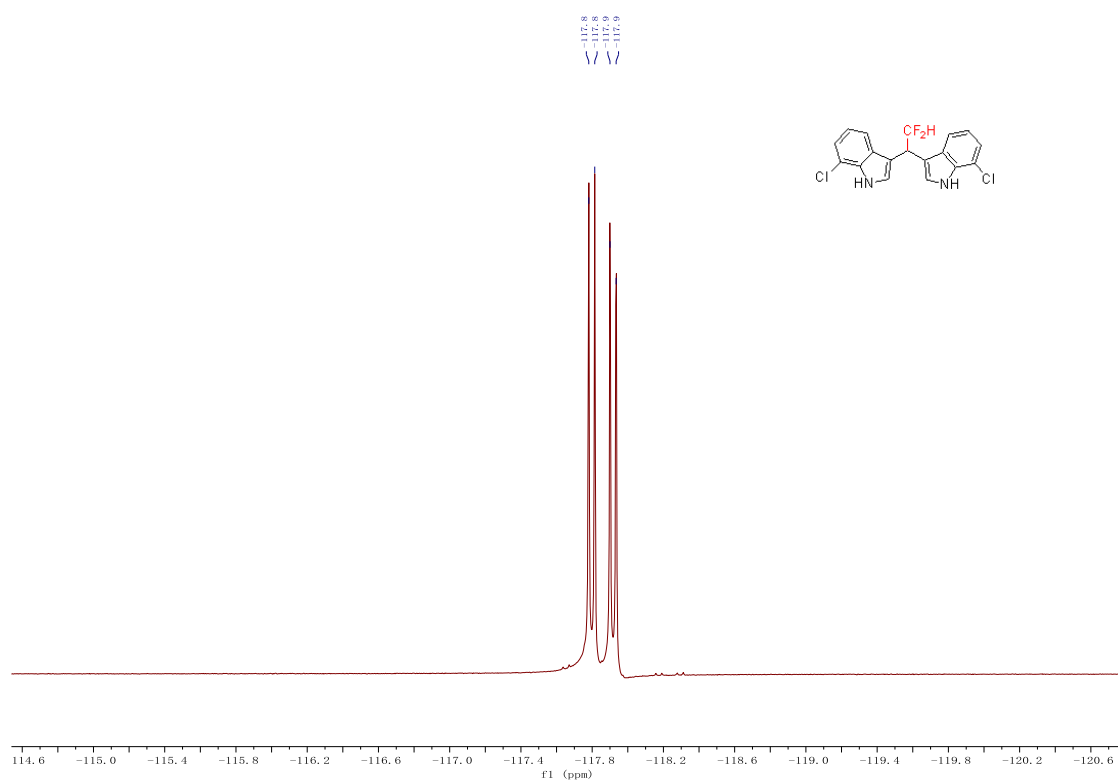

<sup>1</sup>H NMR (500 MHz, Methanol-*d*<sub>4</sub>) spectra of **4q**

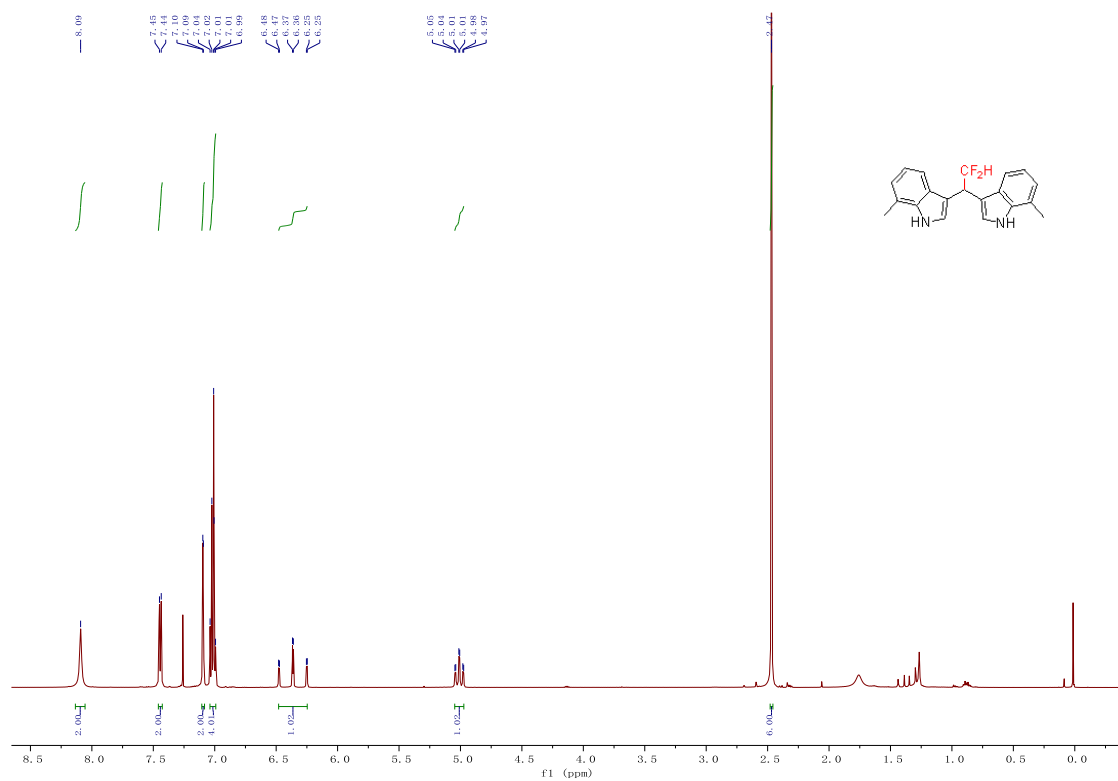

$^{13}\text{C}$  NMR (125 MHz, Methanol- $d_4$ ) spectra of **4q**

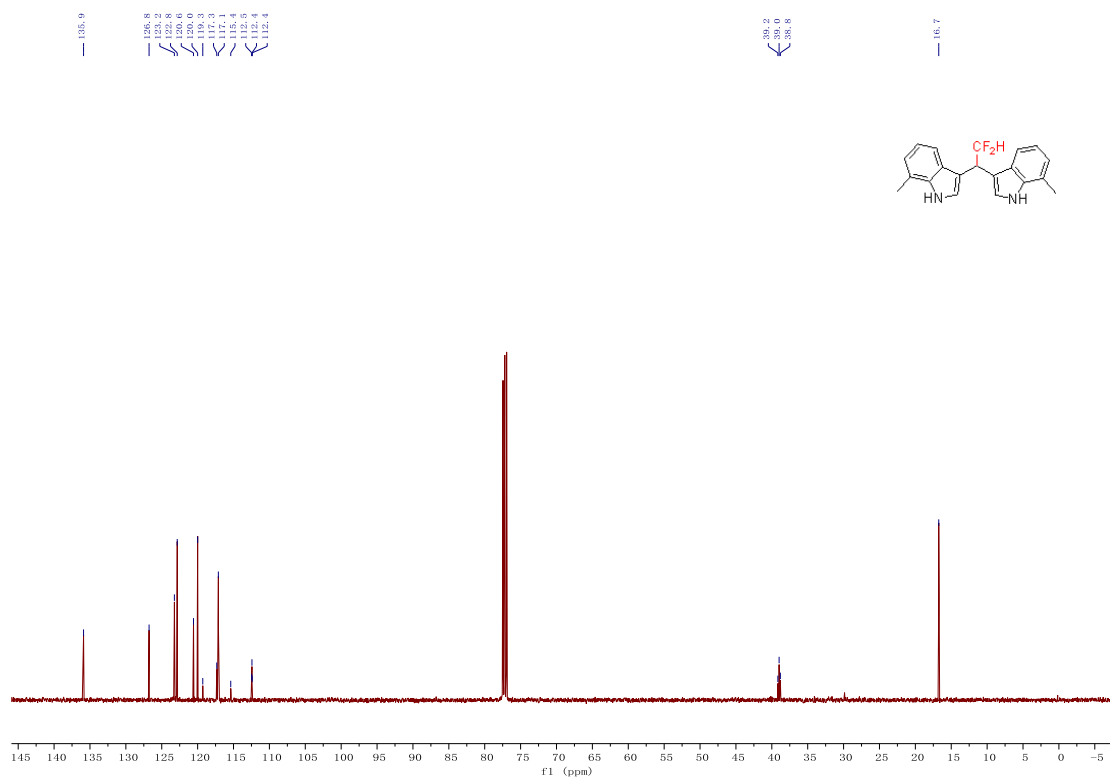

$^{19}\text{F}$  NMR (470 MHz, Methanol- $d_4$ ) spectra of **4q**

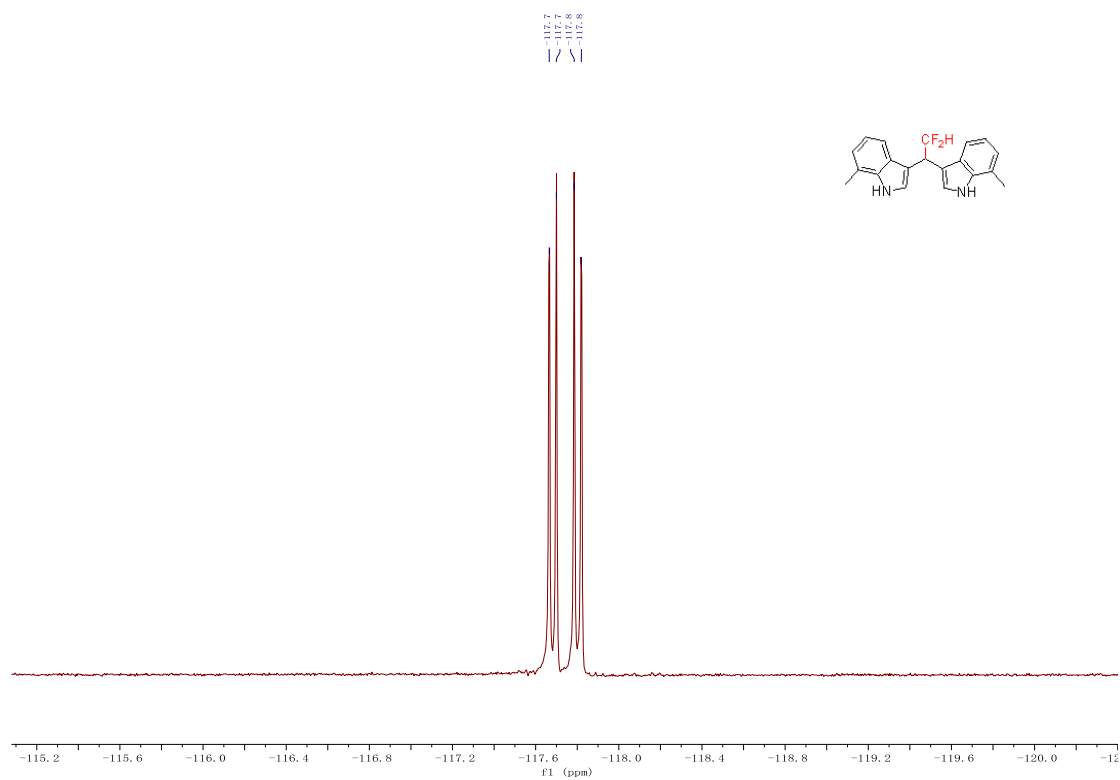

$^1\text{H}$  NMR (500 MHz, Methanol- $d_4$ ) spectra of **4r**

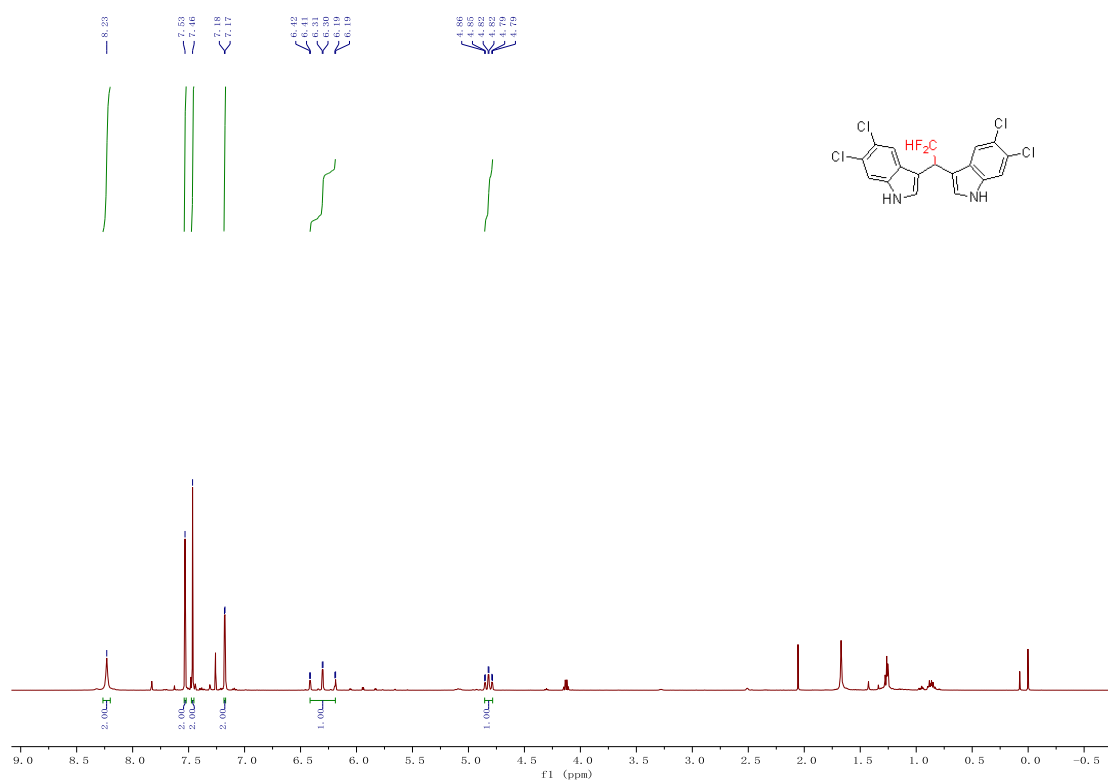

$^{13}\text{C}$  NMR (125 MHz, Methanol- $d_4$ ) spectra of **4r**

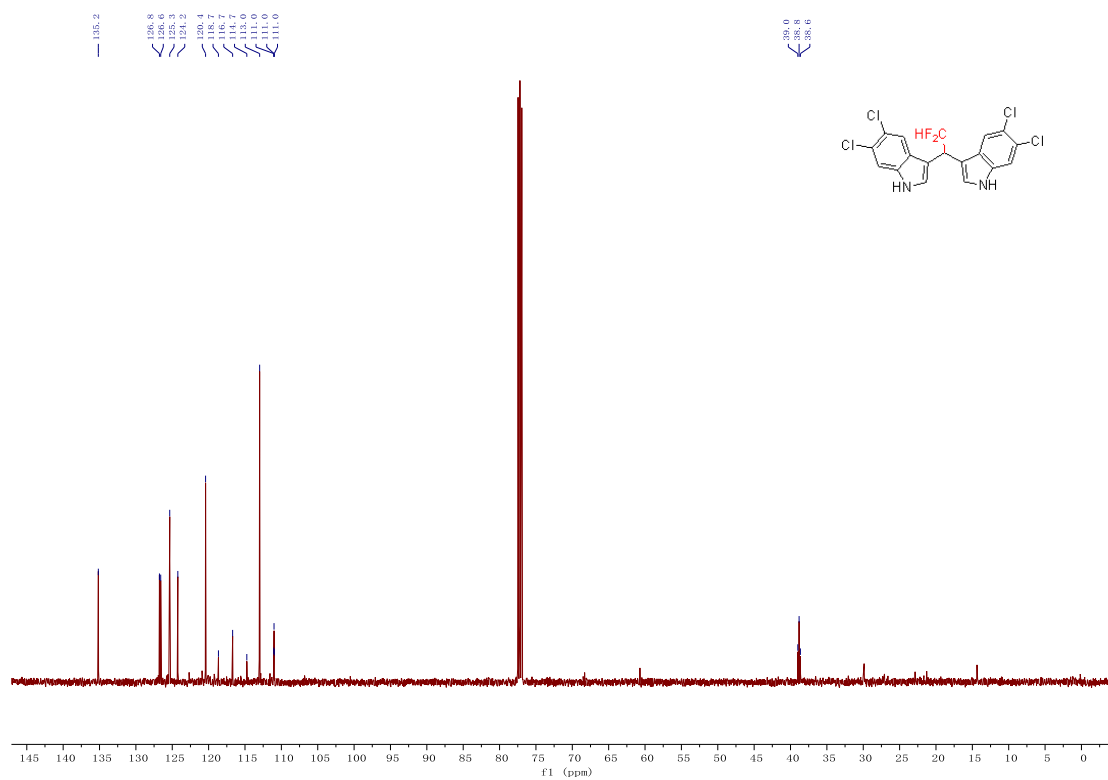

$^{19}\text{F}$  NMR (470 MHz, Methanol- $d_4$ ) spectra of **4r**

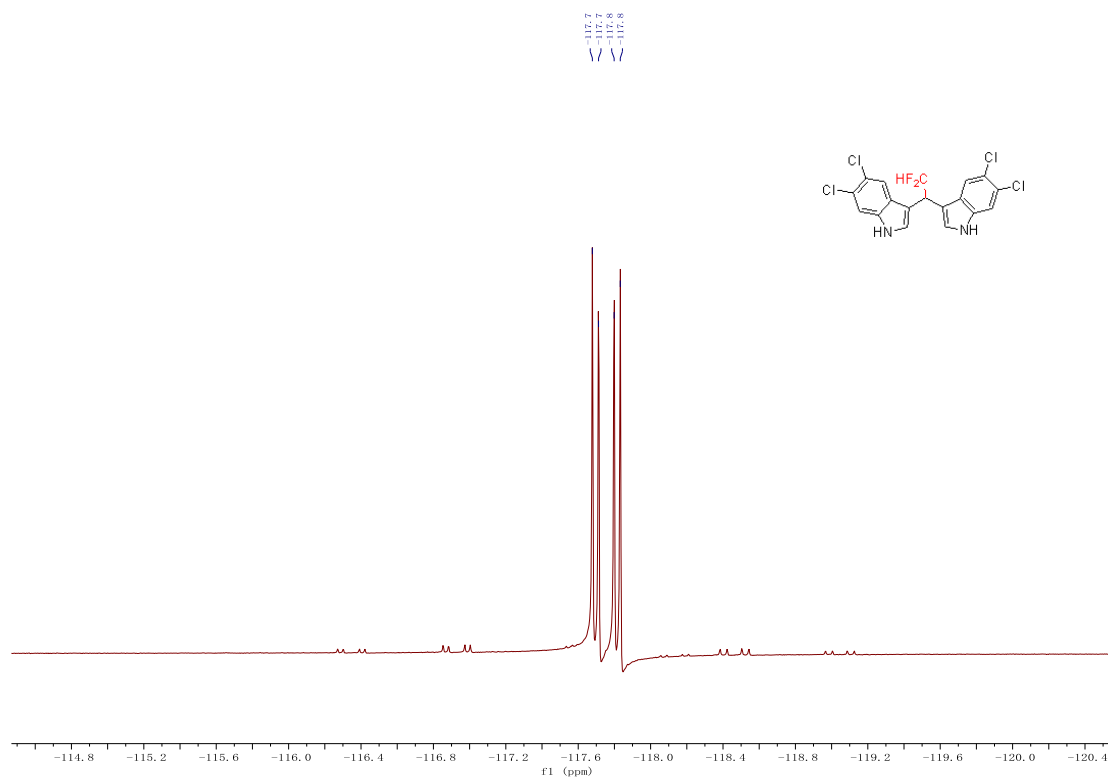

$^1\text{H}$  NMR (400 MHz,  $\text{CDCl}_3$ ) spectra of **7aa**

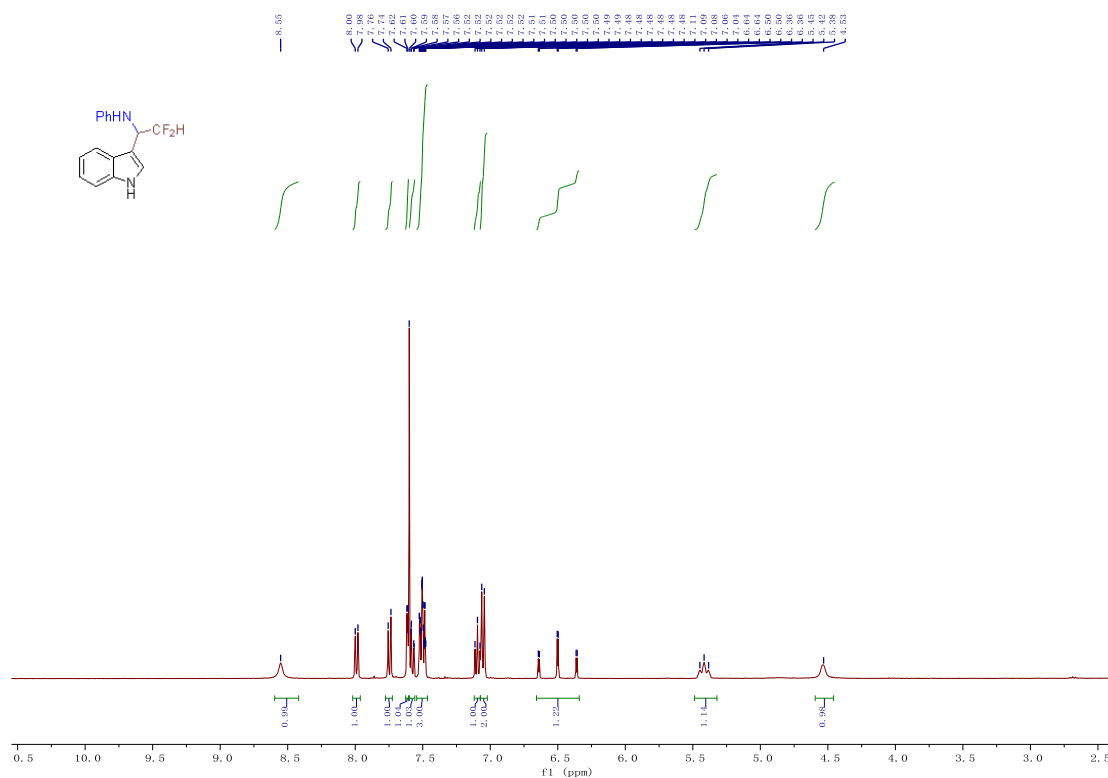

$^{13}\text{C}$  NMR (101 MHz, Chloroform- $d$ ) spectra of **7aa**

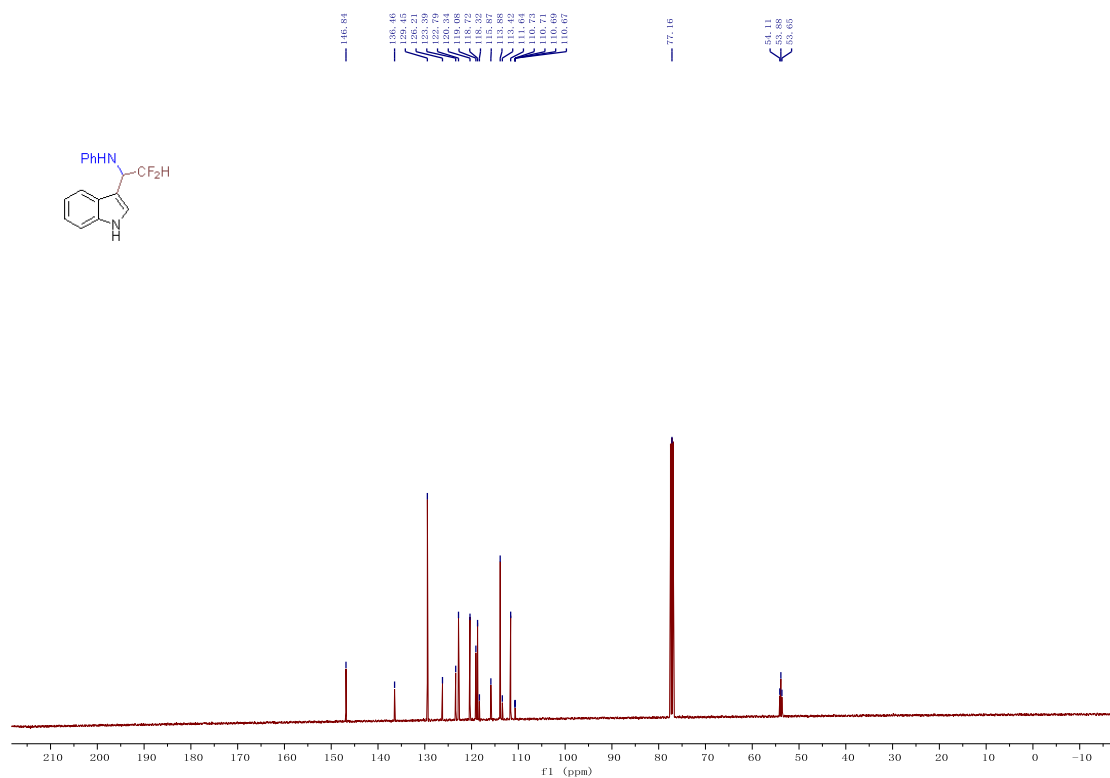

<sup>19</sup>F NMR (377 MHz, Chloroform-*d*) spectra of 7aa

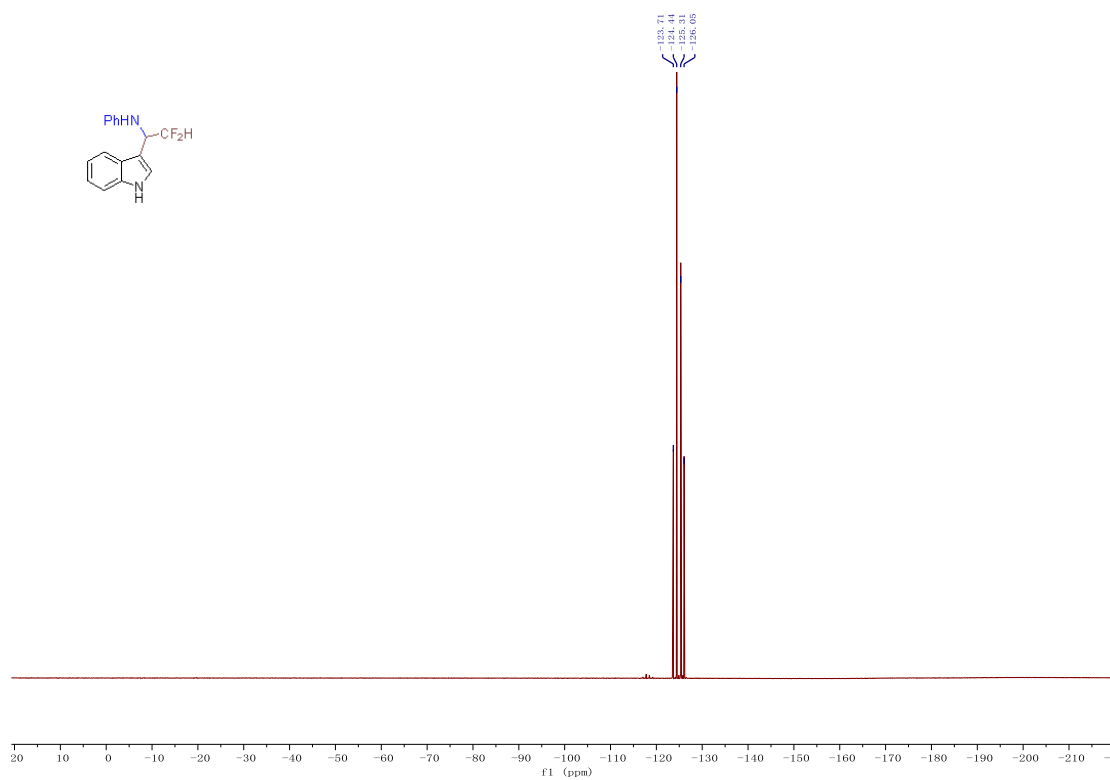

<sup>1</sup>H NMR (600 MHz, CDCl<sub>3</sub>) spectra of 7ba

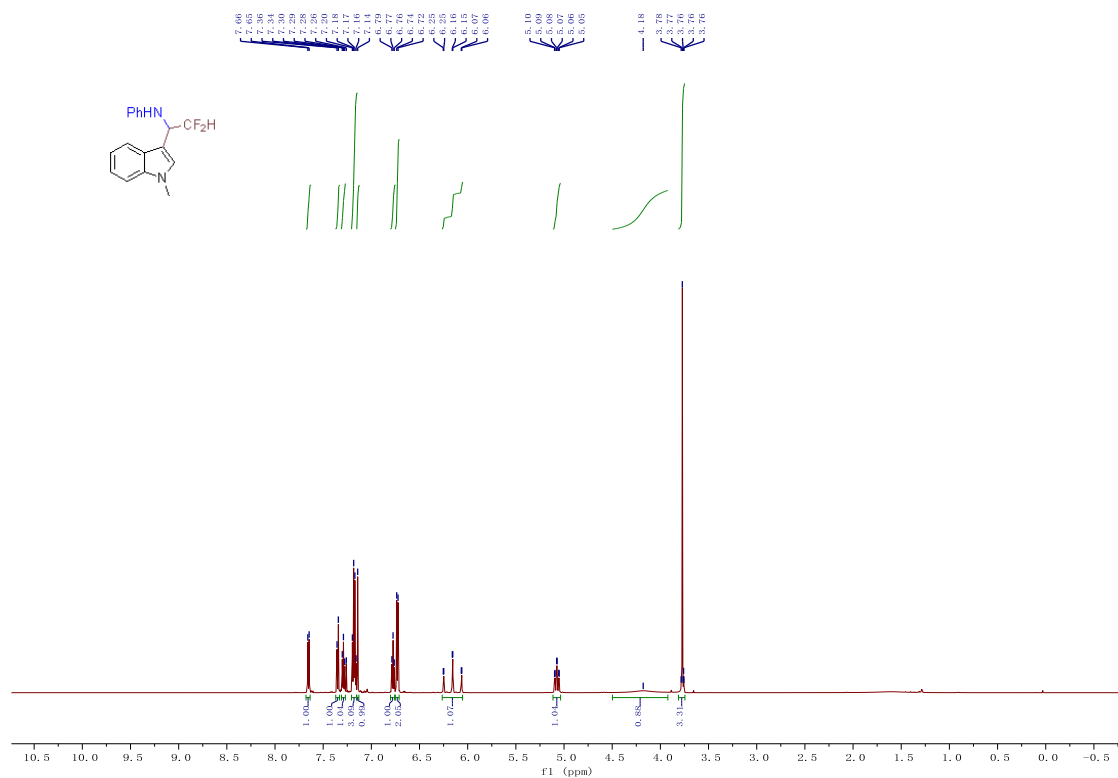

<sup>13</sup>C NMR (151 MHz, Chloroform-d) spectra of **7ba**

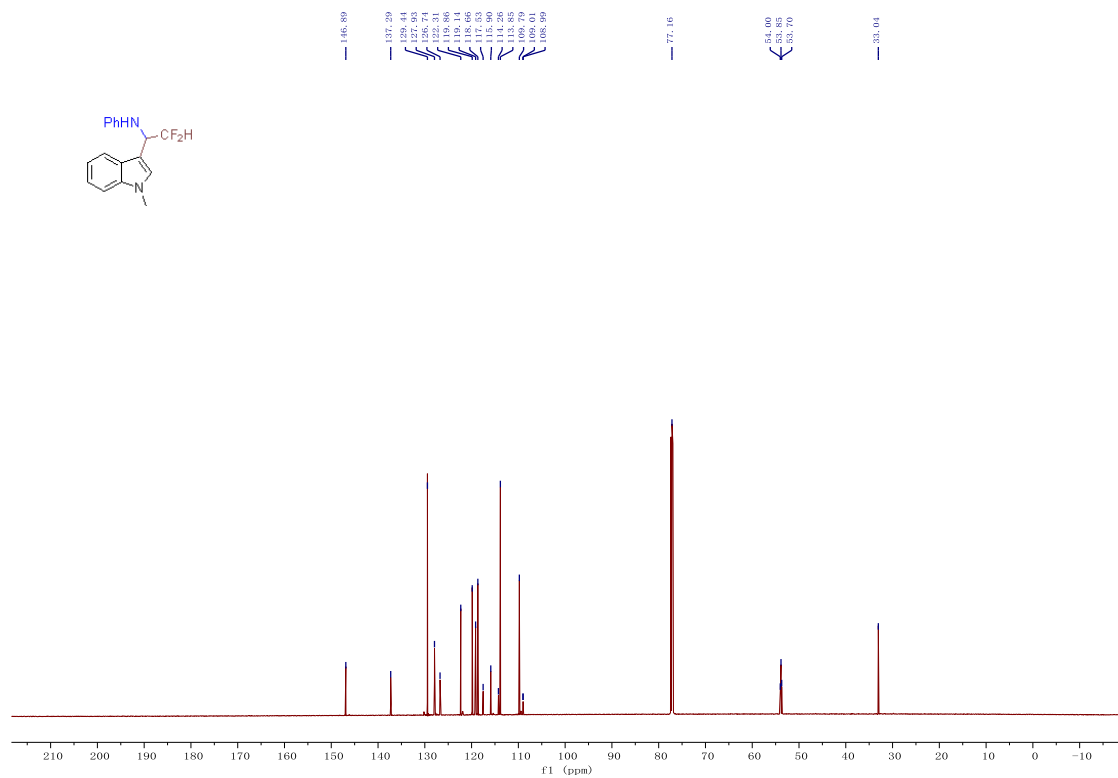

<sup>19</sup>F NMR (377 MHz, Chloroform-d) spectra of **7ba**

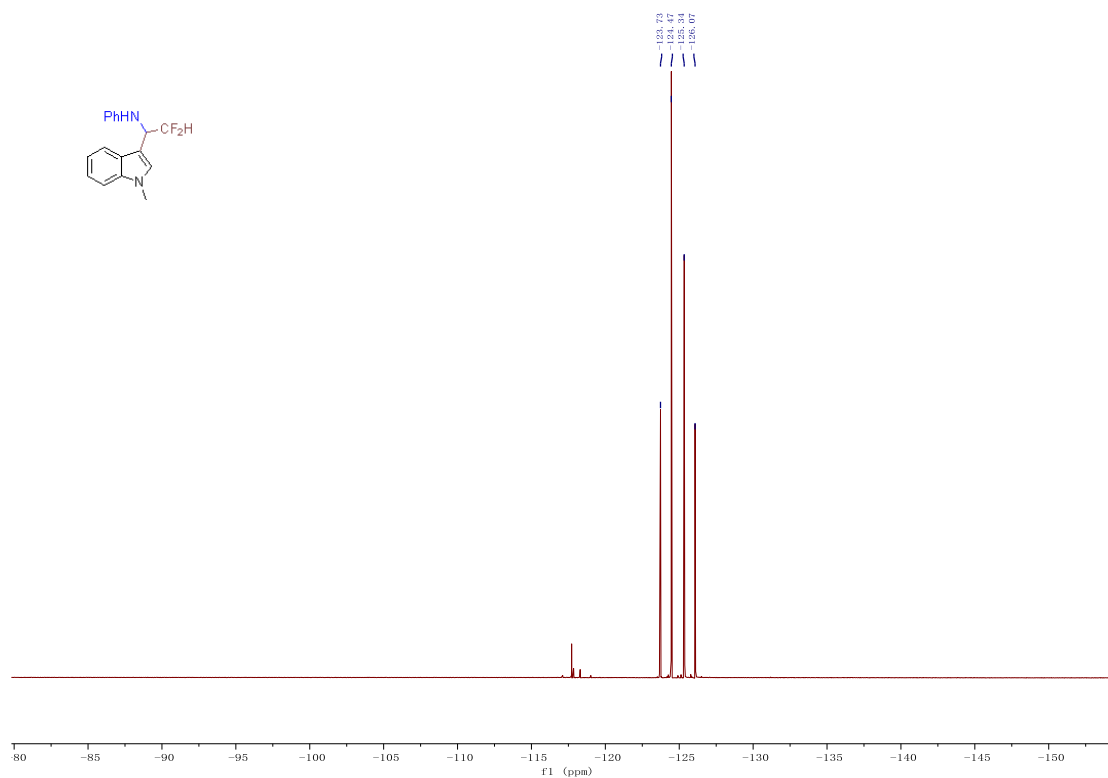

**<sup>1</sup>H NMR (400 MHz, CDCl<sub>3</sub>) spectra of 7ca**

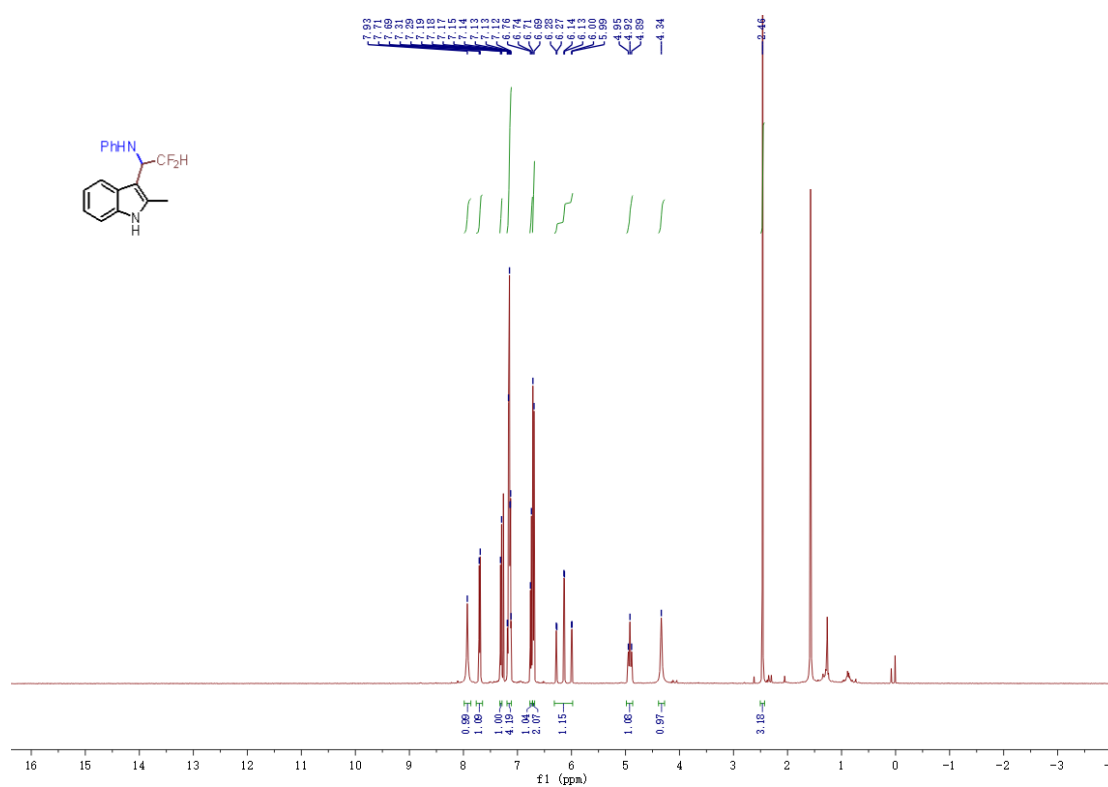

**<sup>13</sup>C NMR (151 MHz, Chloroform-d) spectra of 7ca**





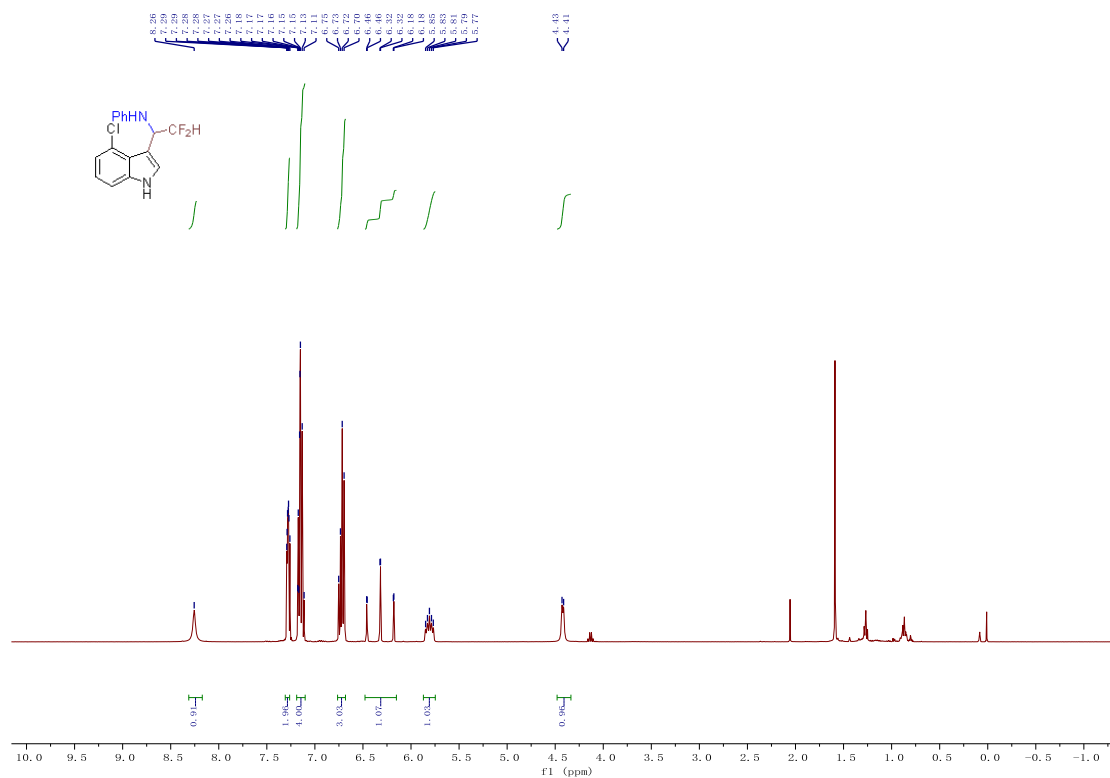

<sup>13</sup>C NMR (101 MHz, Chloroform-d) spectra of **7da**

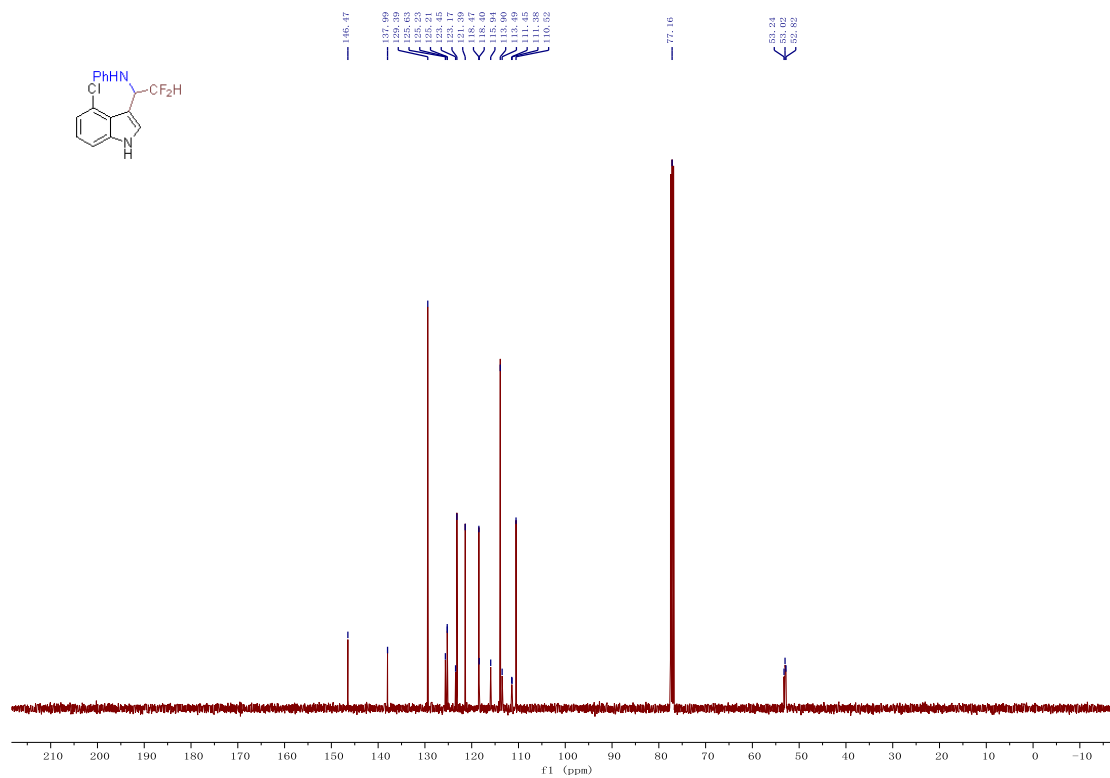

<sup>19</sup>F NMR (377 MHz, Chloroform-d) spectra of **7da**

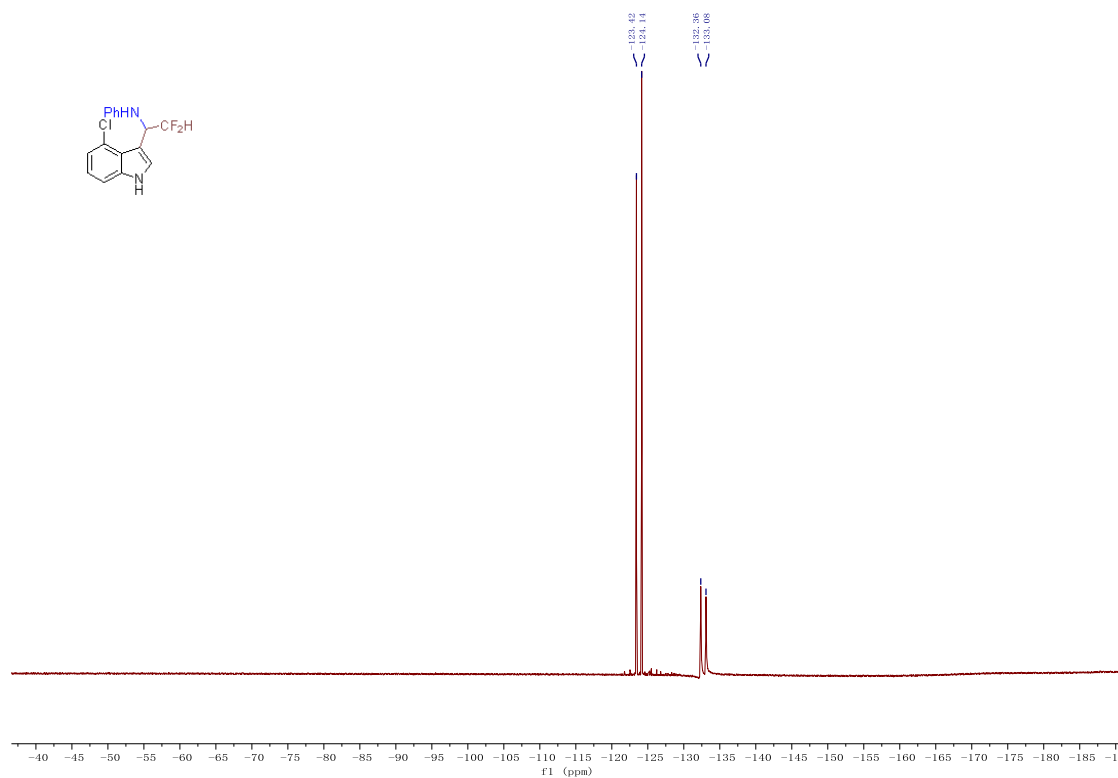

$^1\text{H}$  NMR (600 MHz,  $\text{CDCl}_3$ ) spectra of 7ea

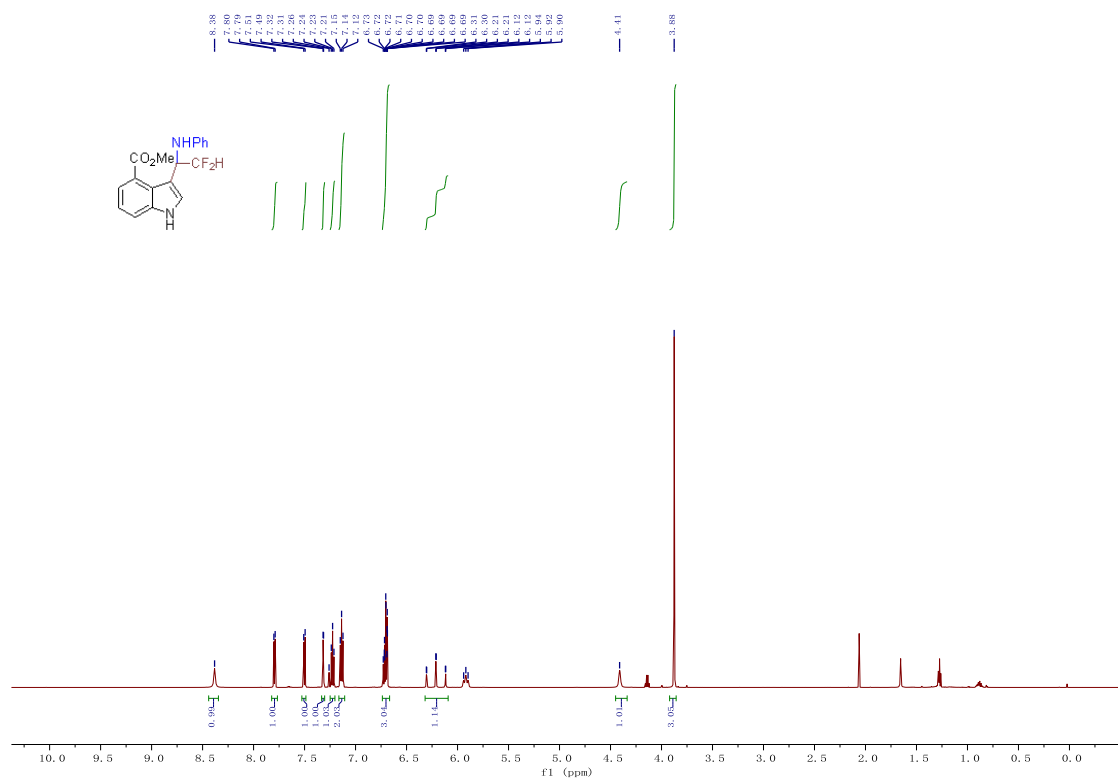

$^{13}\text{C}$  NMR (151 MHz, Chloroform-d) spectra of 7ea

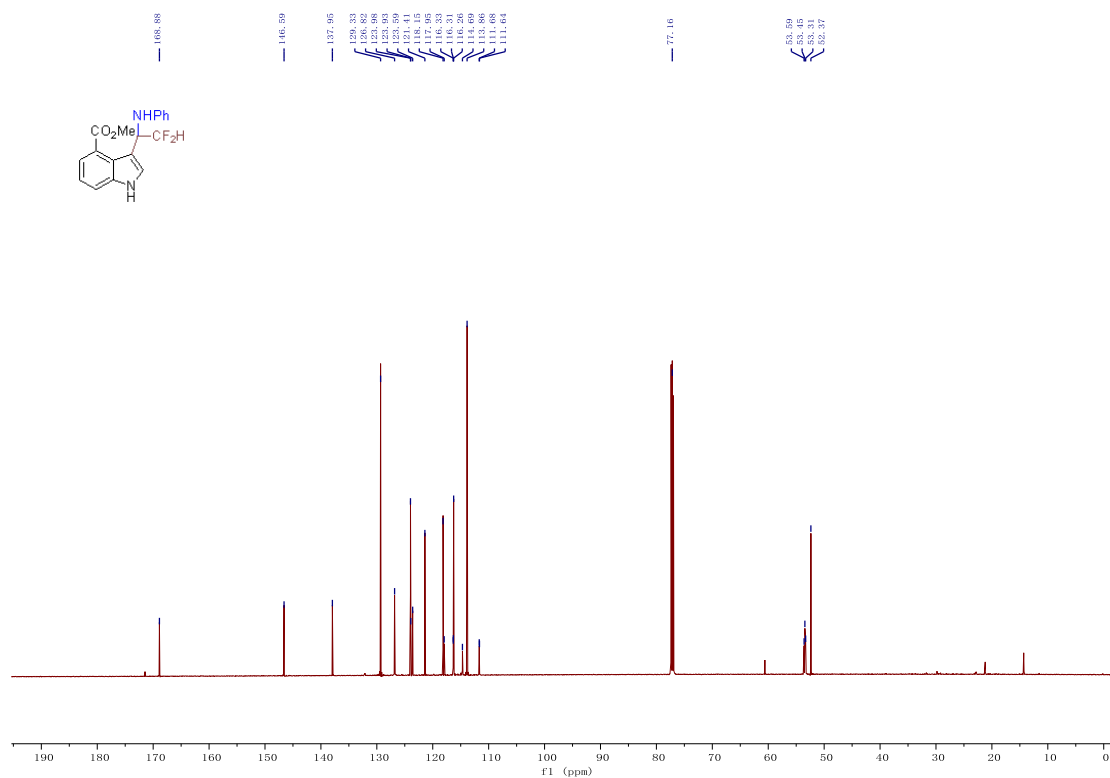

$^{19}\text{F}$  NMR (377 MHz, Chloroform-*d*) spectra of **7ea**

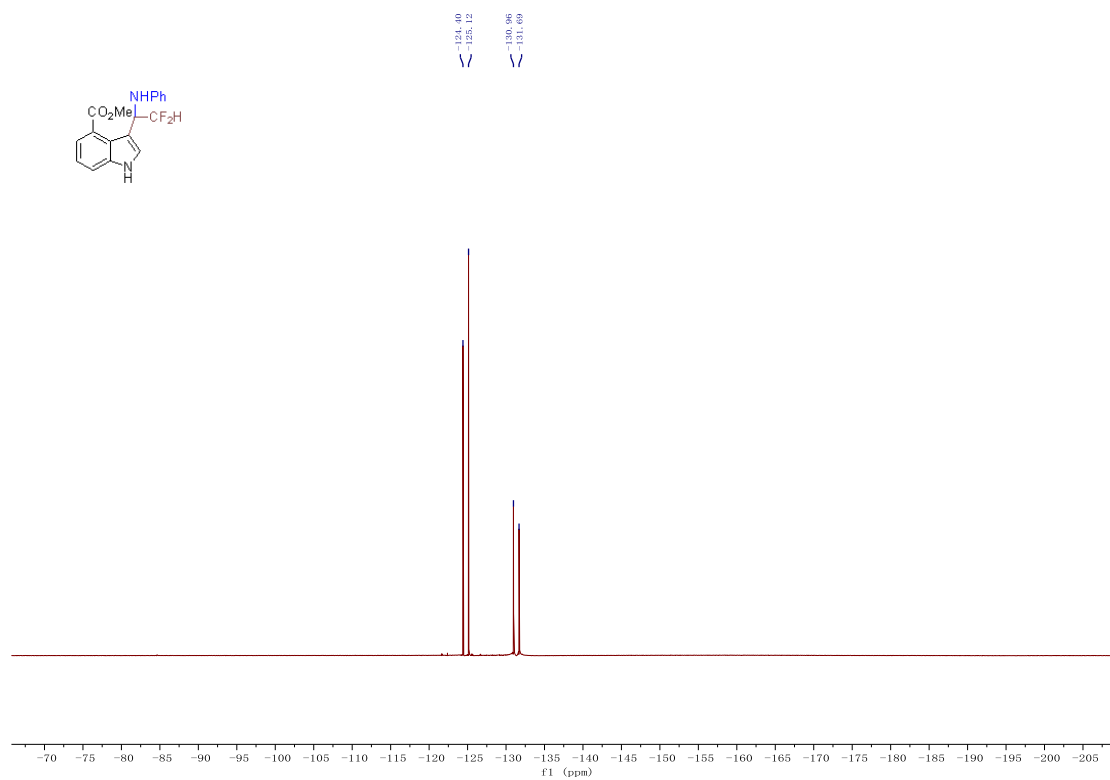

$^1\text{H}$  NMR (600 MHz,  $\text{CDCl}_3$ ) spectra of **7fa**

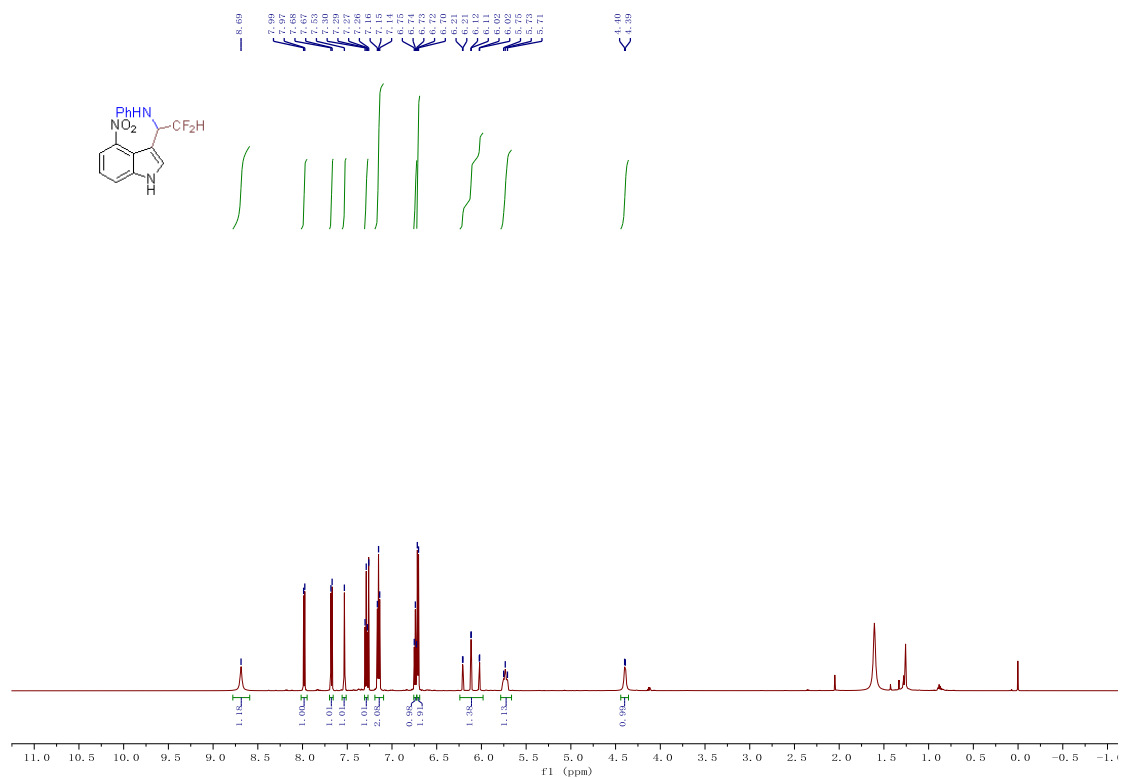

**<sup>13</sup>C NMR (151 MHz, Chloroform-d) spectra of 7fa**

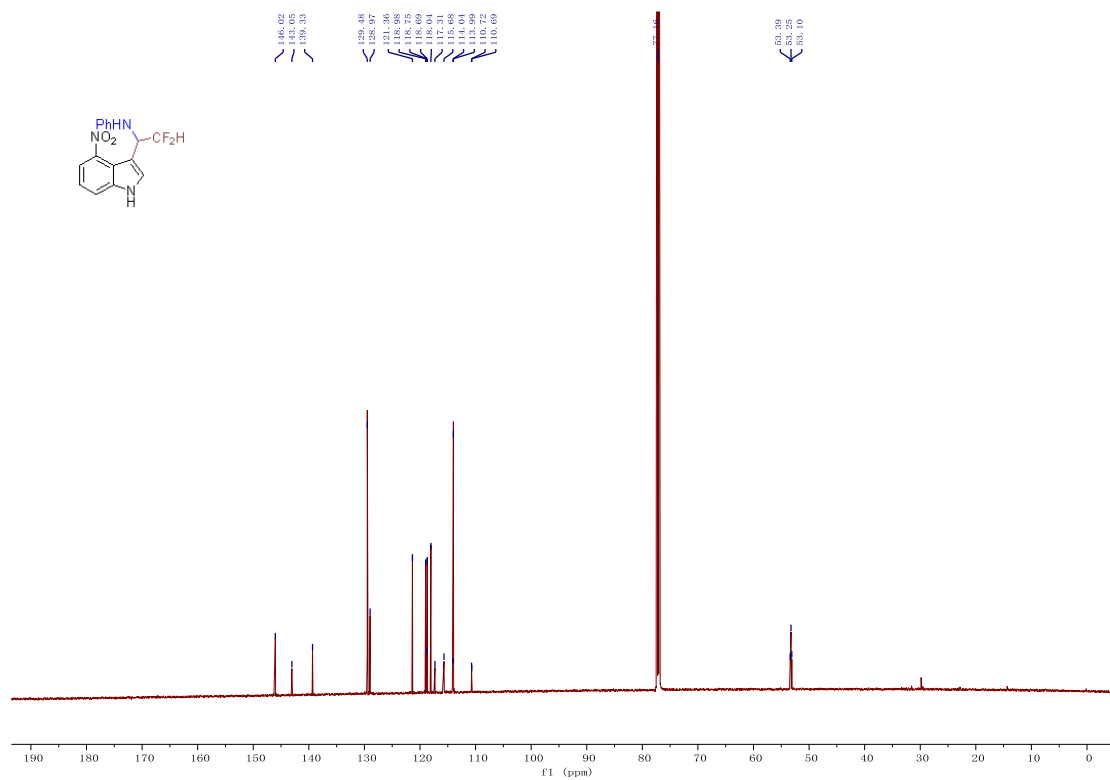

**<sup>19</sup>F NMR (377 MHz, Chloroform-d) spectra of 7fa**

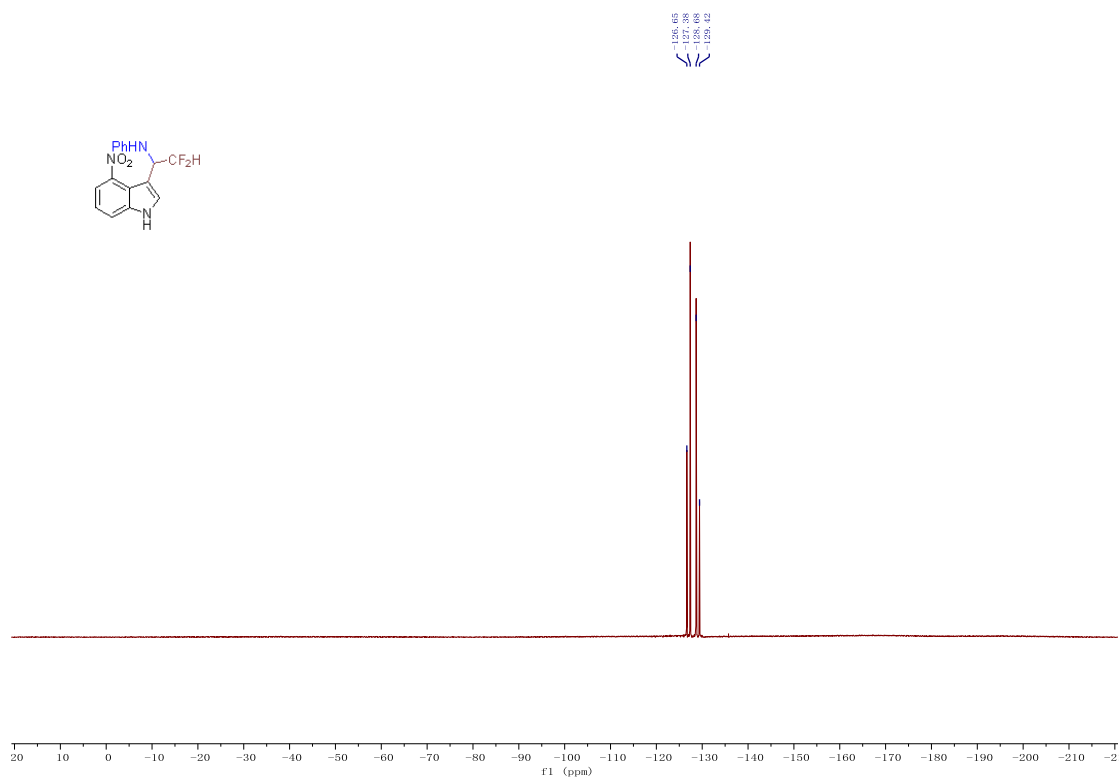

<sup>1</sup>H NMR (400 MHz, CDCl<sub>3</sub>) spectra of **7ga**

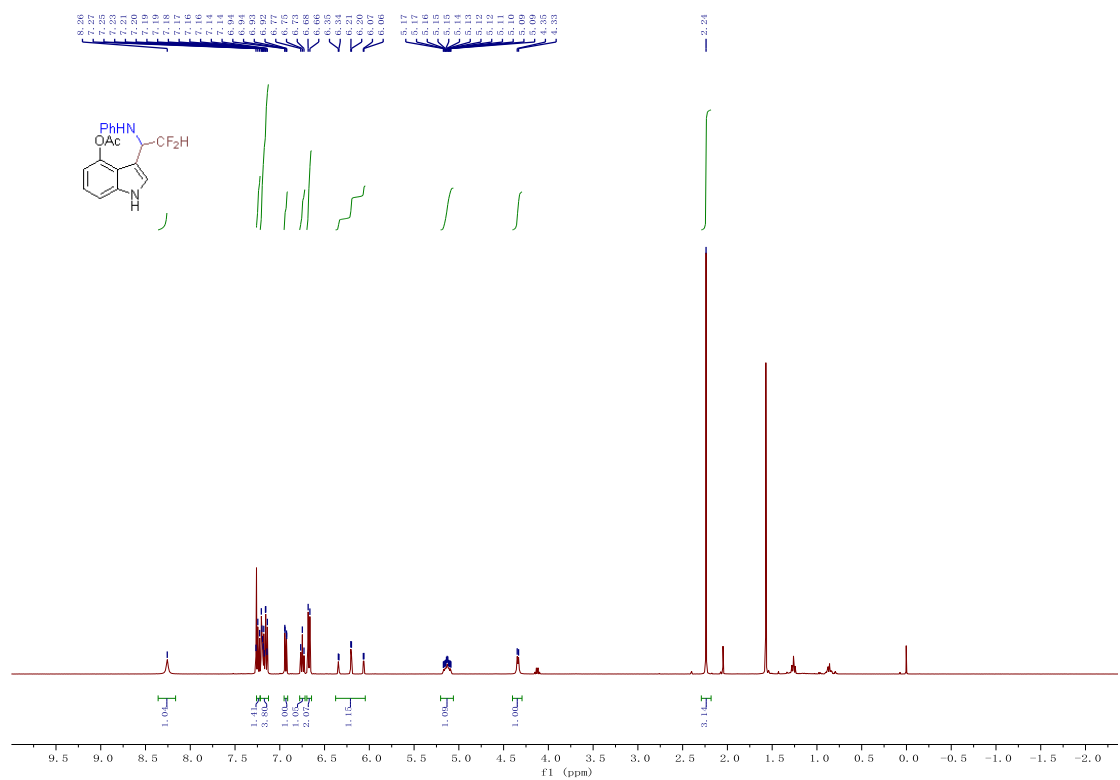

<sup>13</sup>C NMR (101 MHz, Chloroform-d) spectra of **7ga**

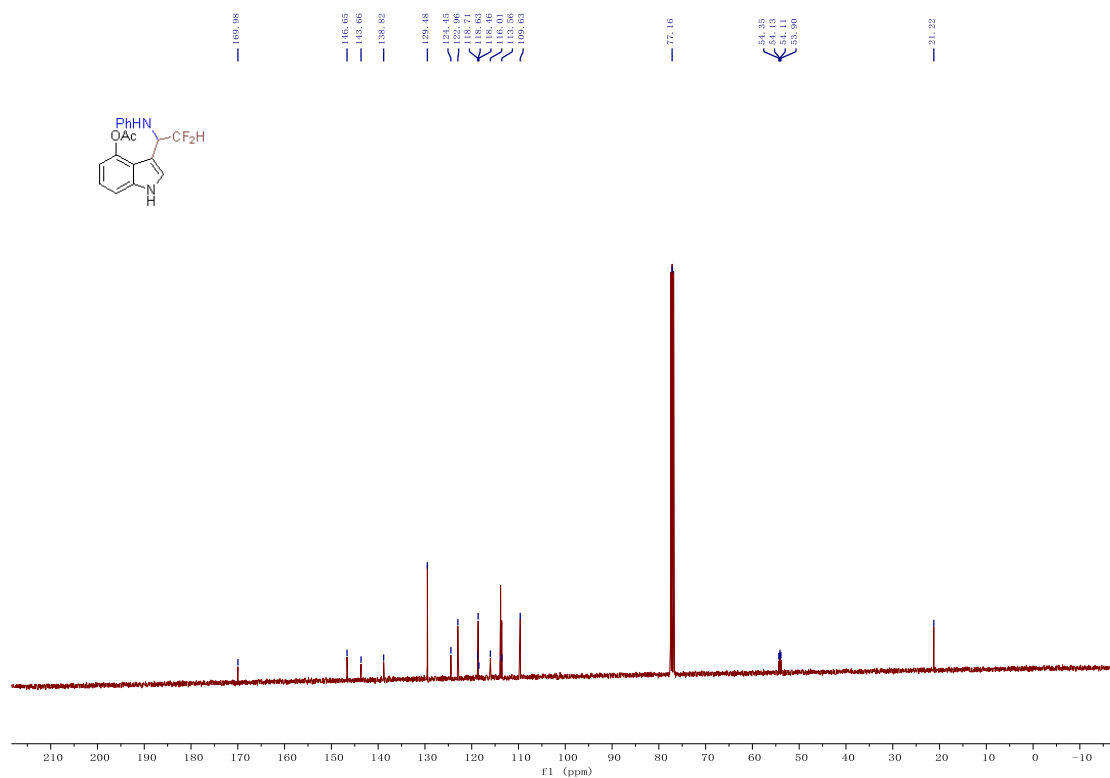

**<sup>19</sup>F NMR (377 MHz, Chloroform-*d*) spectra of **7ga****

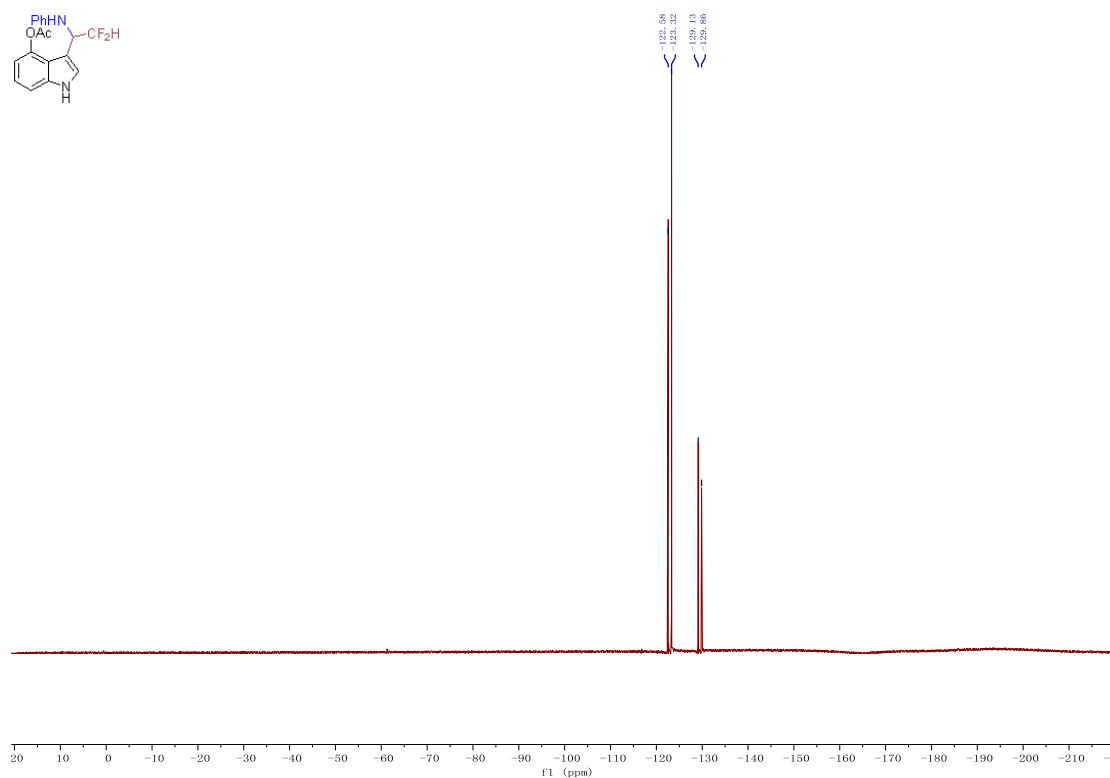

**<sup>1</sup>H NMR (600 MHz, CDCl<sub>3</sub>) spectra of **7ha****

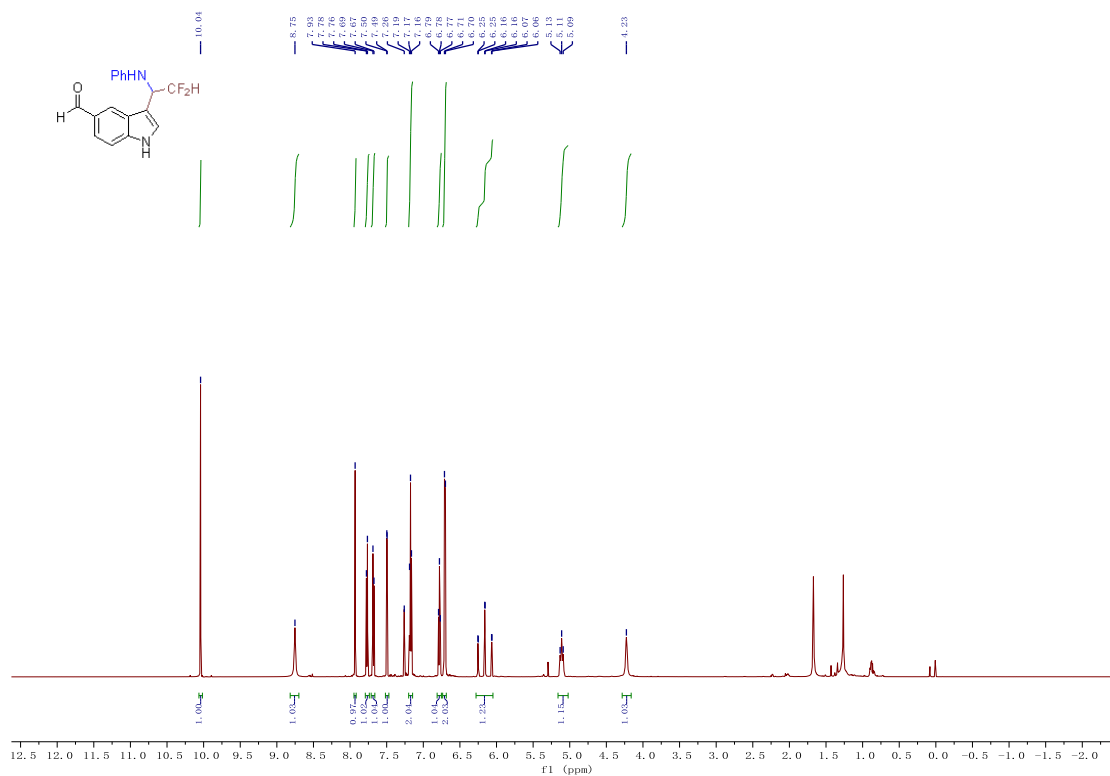

**<sup>13</sup>C NMR (151 MHz, Chloroform-*d*) spectra of 7ha**

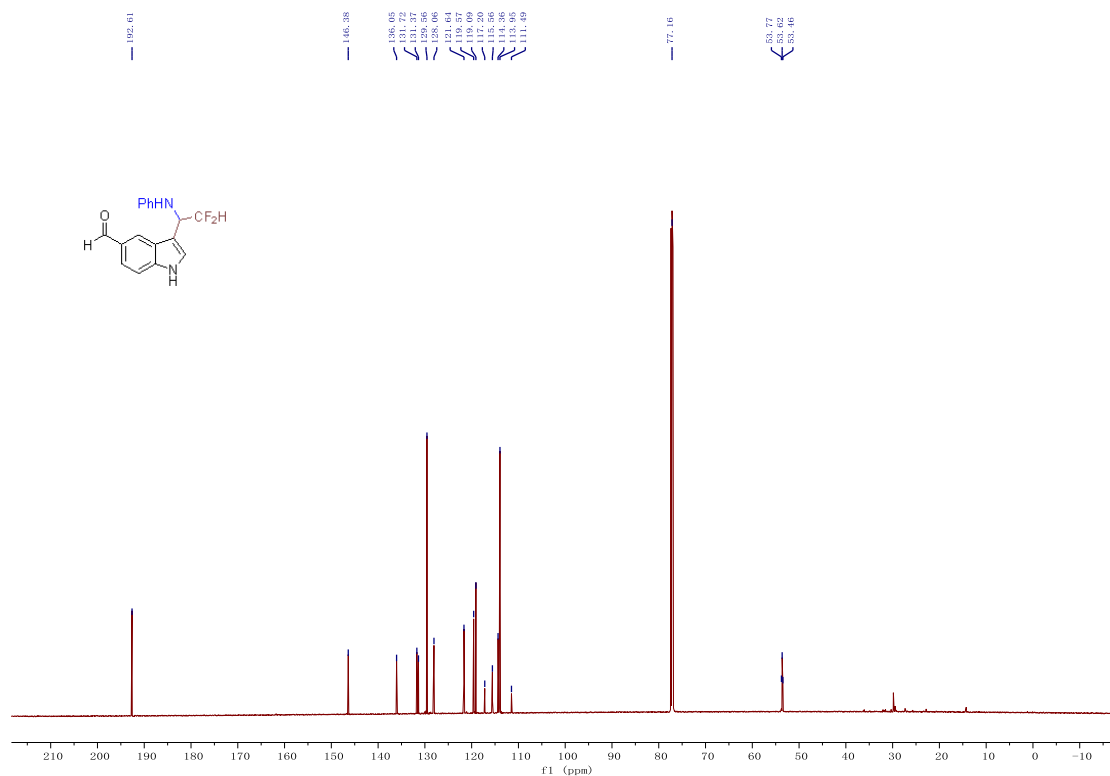

**<sup>19</sup>F NMR (377 MHz, Chloroform-*d*) spectra of 7ha**

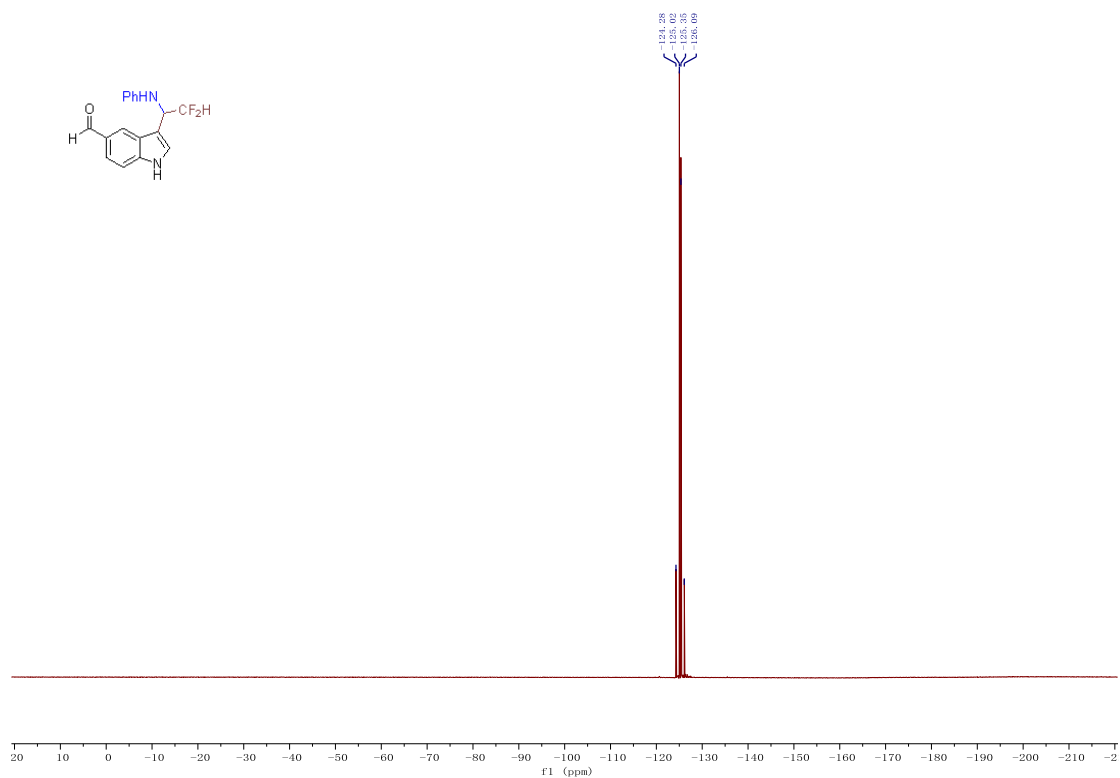

$^1\text{H}$  NMR (600 MHz,  $\text{CDCl}_3$ ) spectra of 7ia

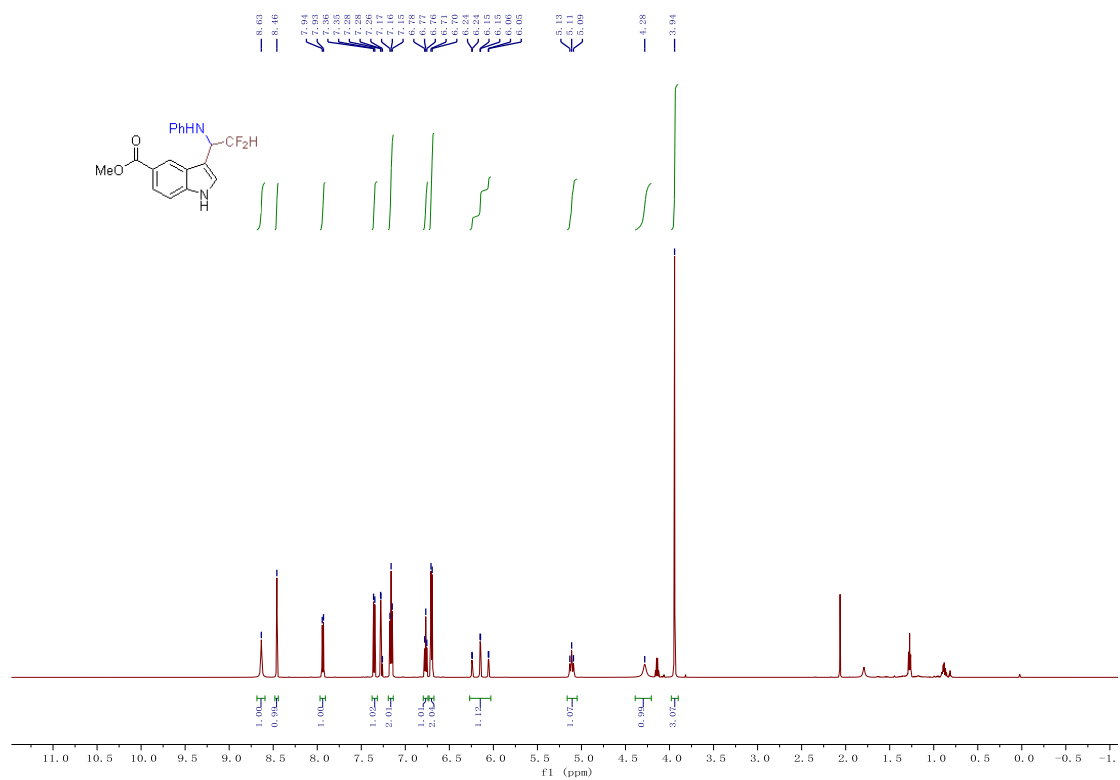

$^{13}\text{C}$  NMR (151 MHz, Chloroform-d) spectra of 7ia



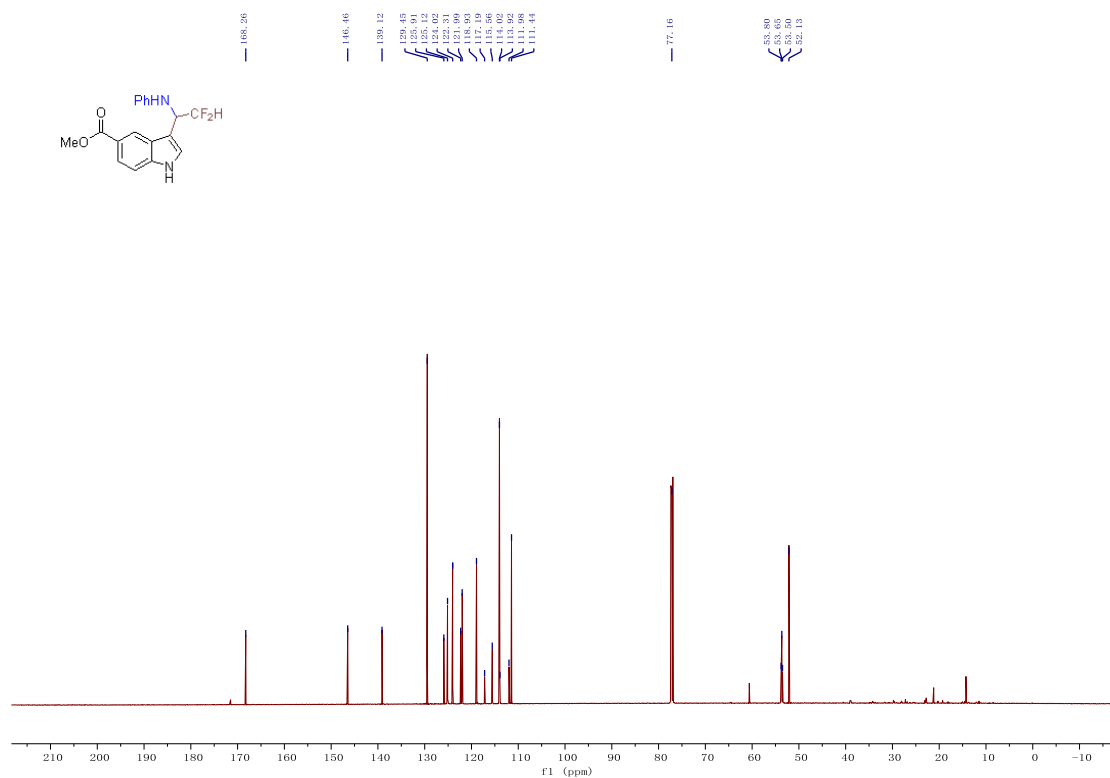

$^{19}\text{F}$  NMR (377 MHz, Chloroform-*d*) spectra of **7ia**

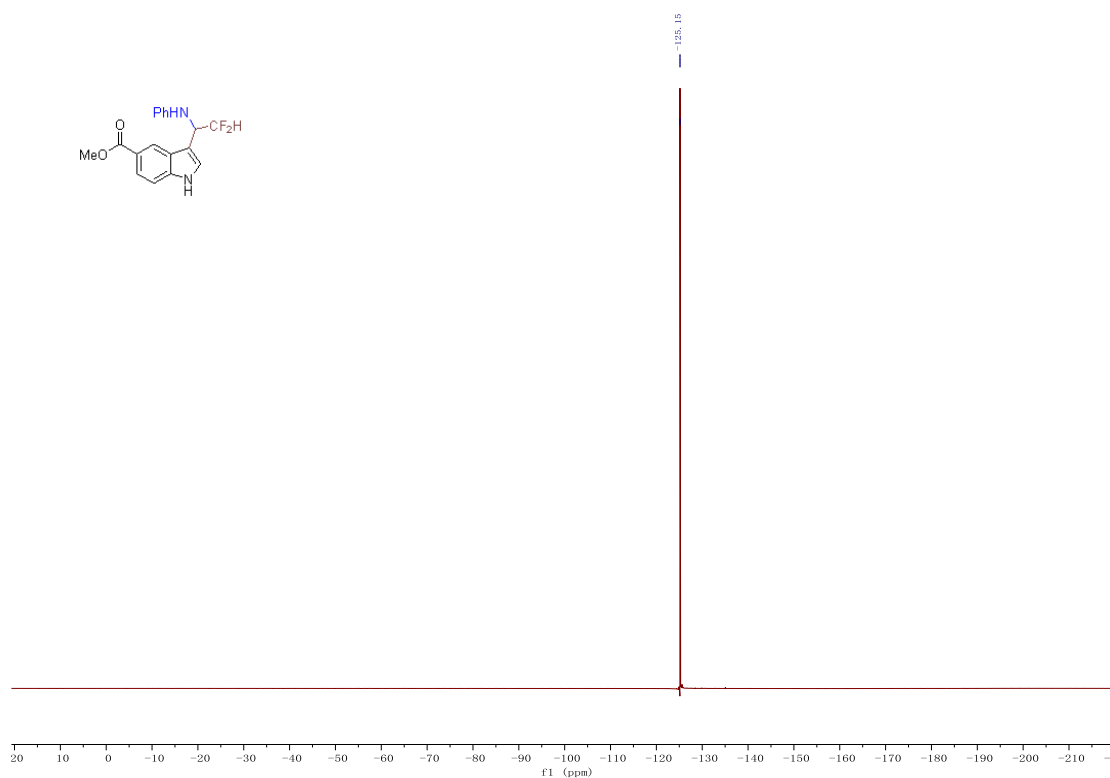

### $^1\text{H}$ NMR (600 MHz, DMSO- $d_6$ ) spectra of **7ja**

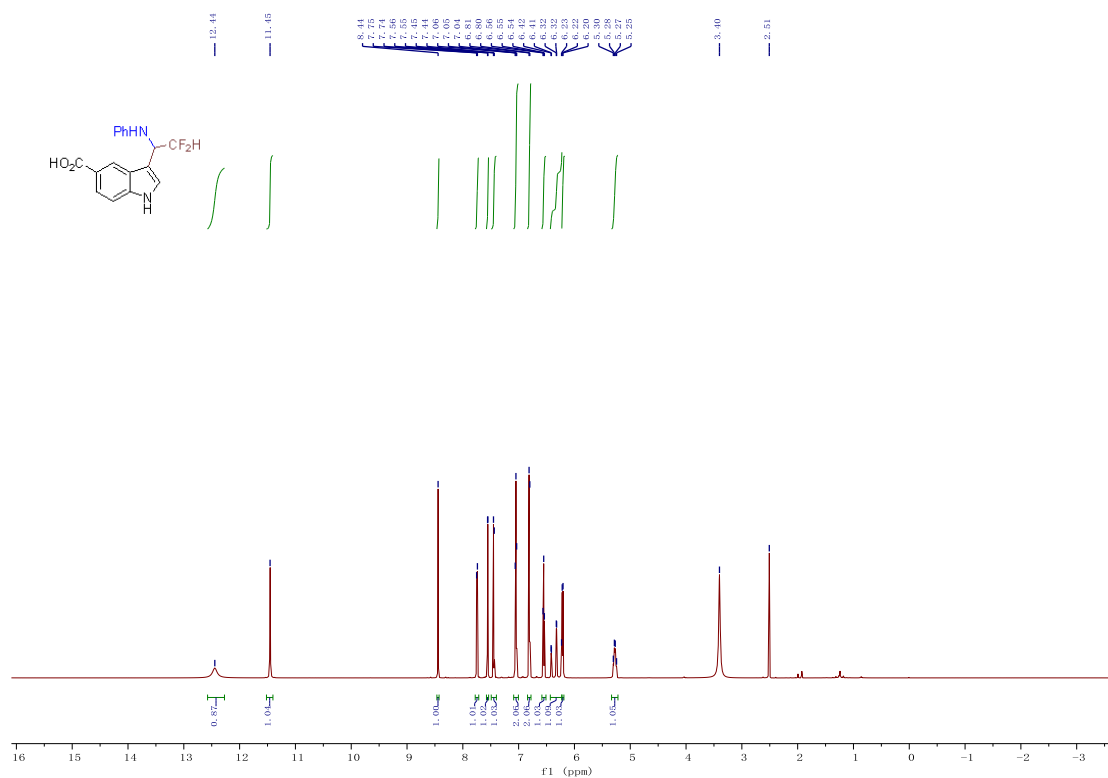

### $^{13}\text{C}$ NMR (151 MHz, DMSO- $d_6$ ) spectra of **7ja**

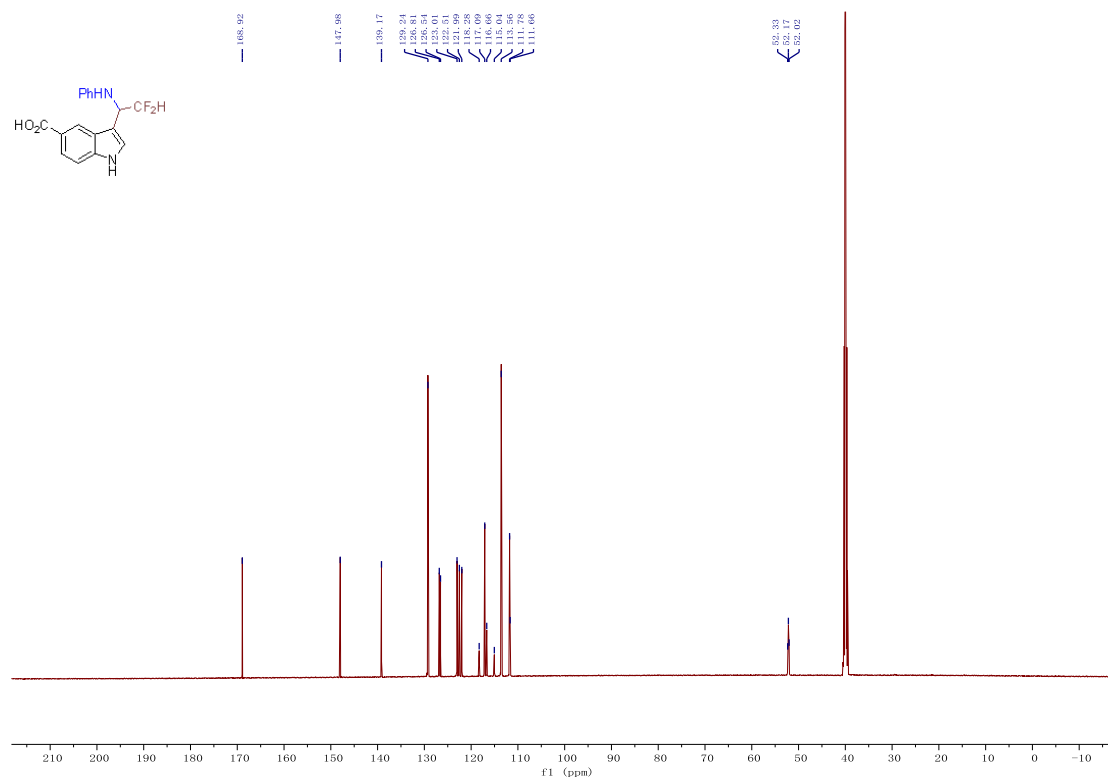

### $^{19}\text{F}$ NMR (377 MHz, Chloroform- $d$ ) spectra of **7ja**

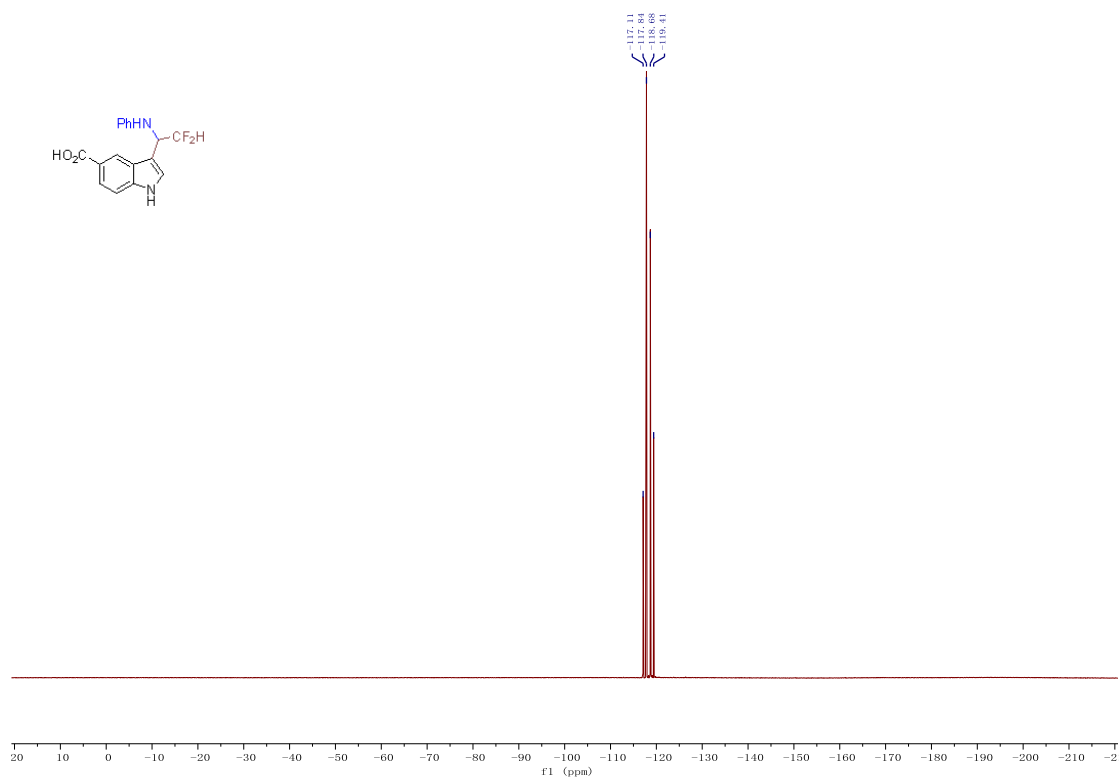

**<sup>1</sup>H NMR (600 MHz, CDCl<sub>3</sub>) spectra of 7ka**

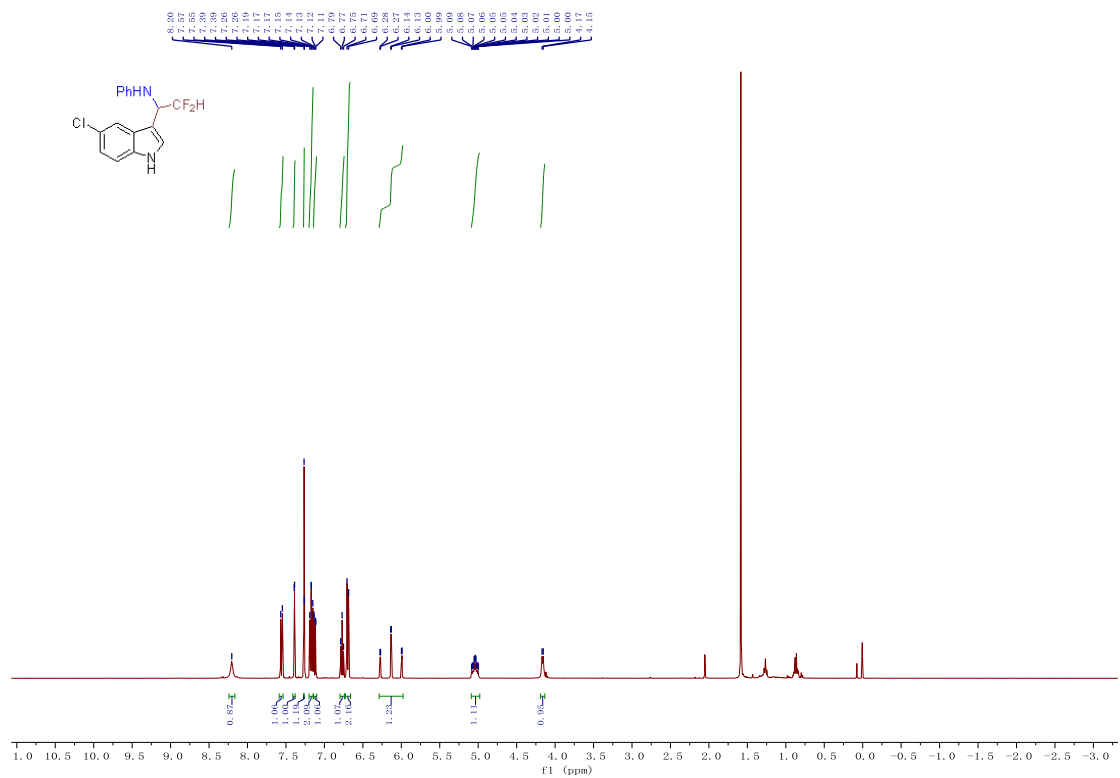

**<sup>13</sup>C NMR (101 MHz, DMSO-d<sub>6</sub>) spectra of 7ka**

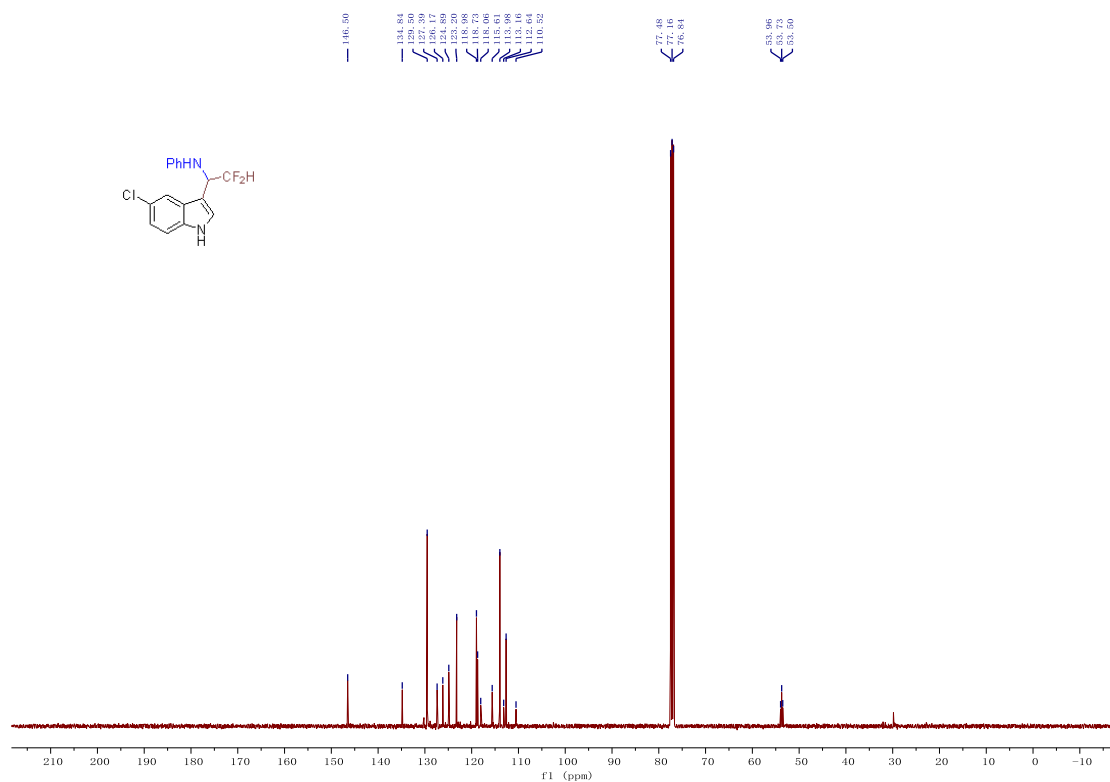

$^{19}\text{F}$  NMR (377 MHz, Chloroform-*d*) spectra of **7ka**

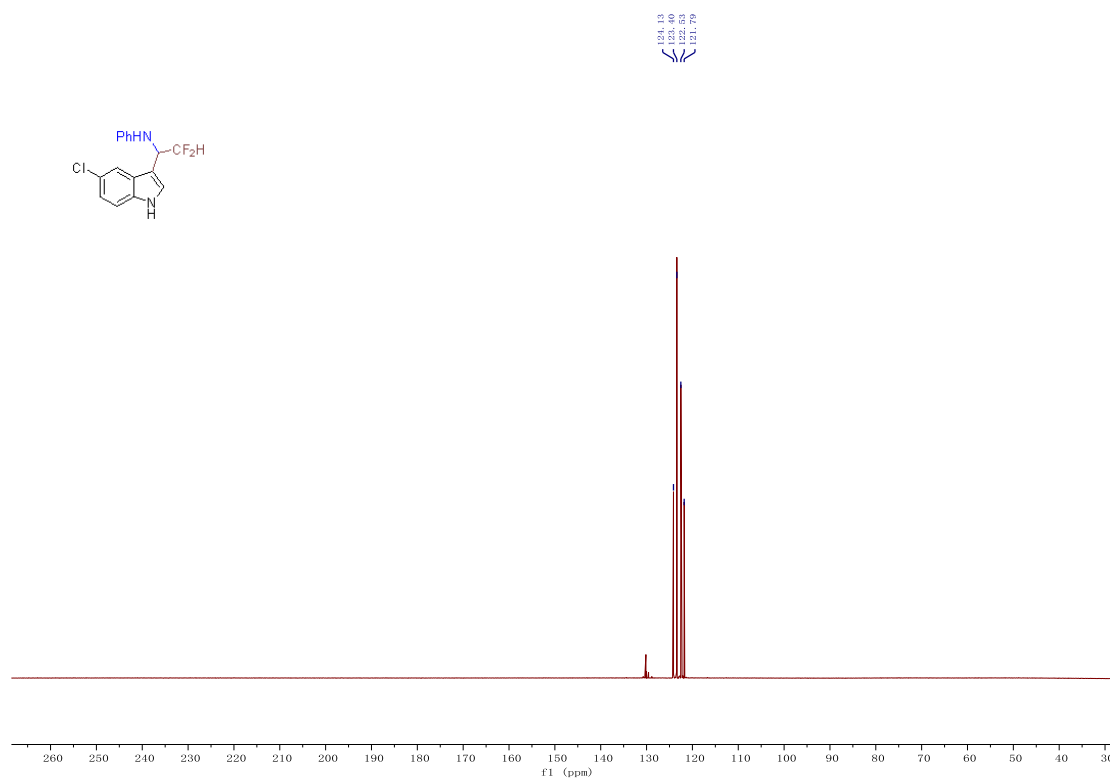

$^1\text{H}$  NMR (400 MHz,  $\text{CDCl}_3$ ) spectra of **7la**

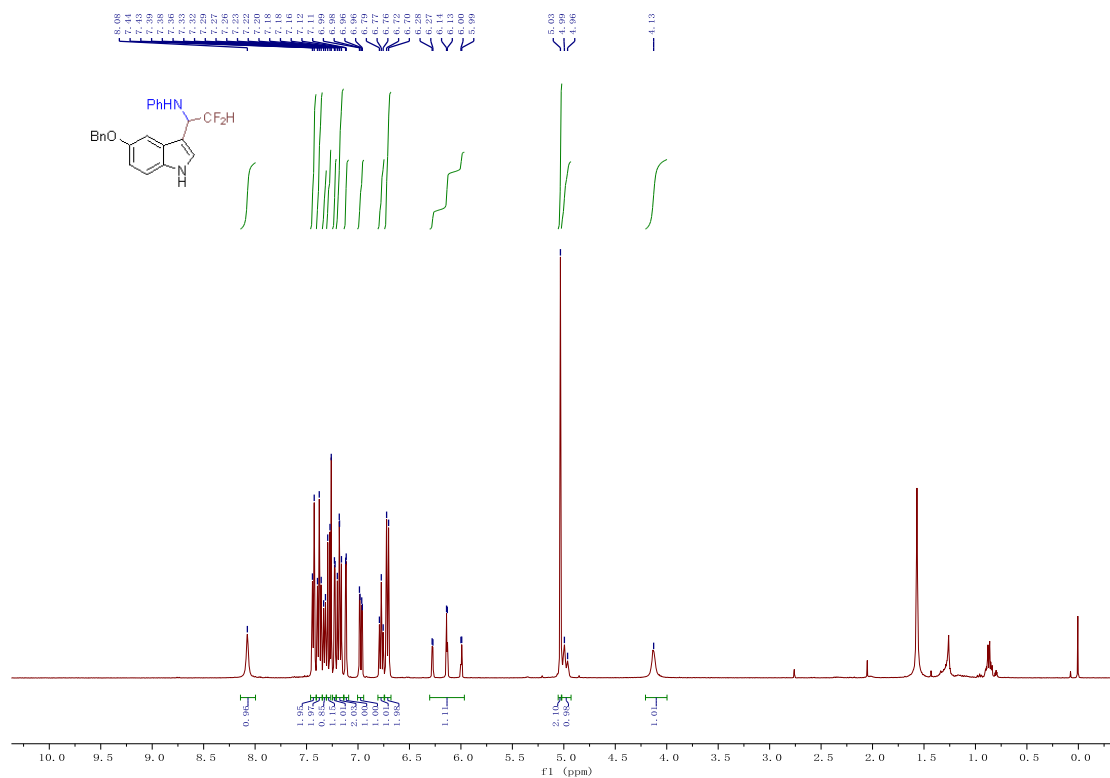

**<sup>13</sup>C NMR (101 MHz, CDCl<sub>3</sub>) spectra of 7la**

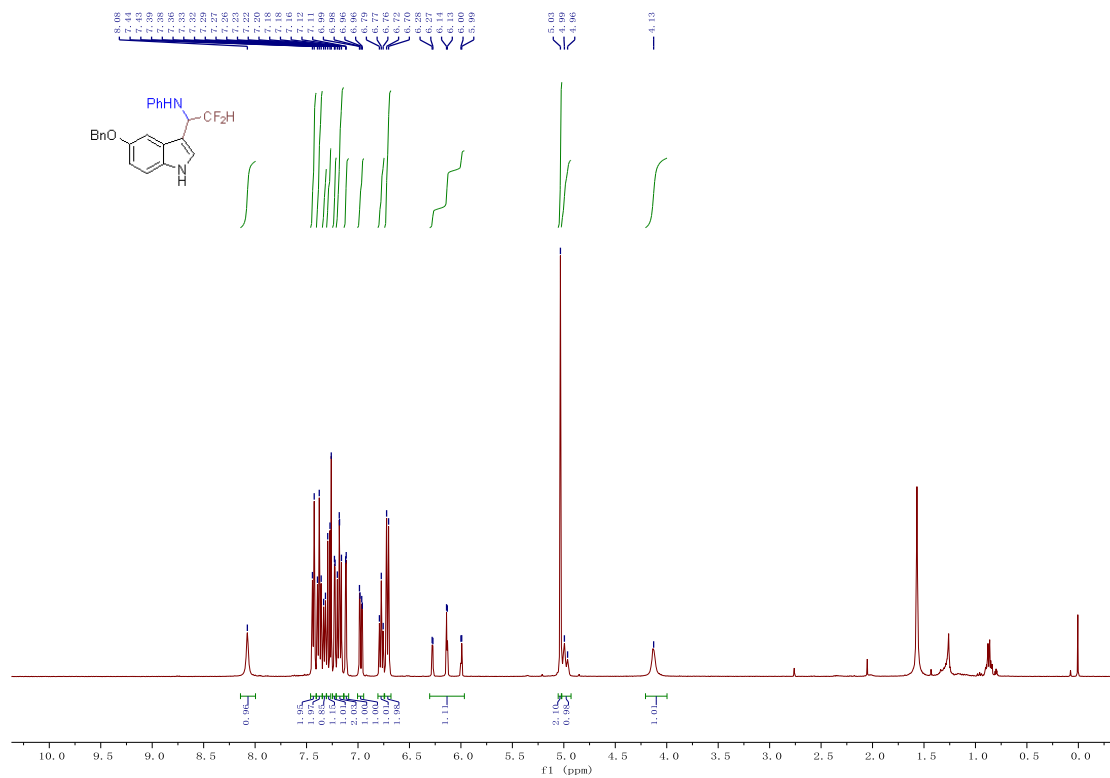

**<sup>19</sup>F NMR (377 MHz, Chloroform-*d*) spectra of 7la**

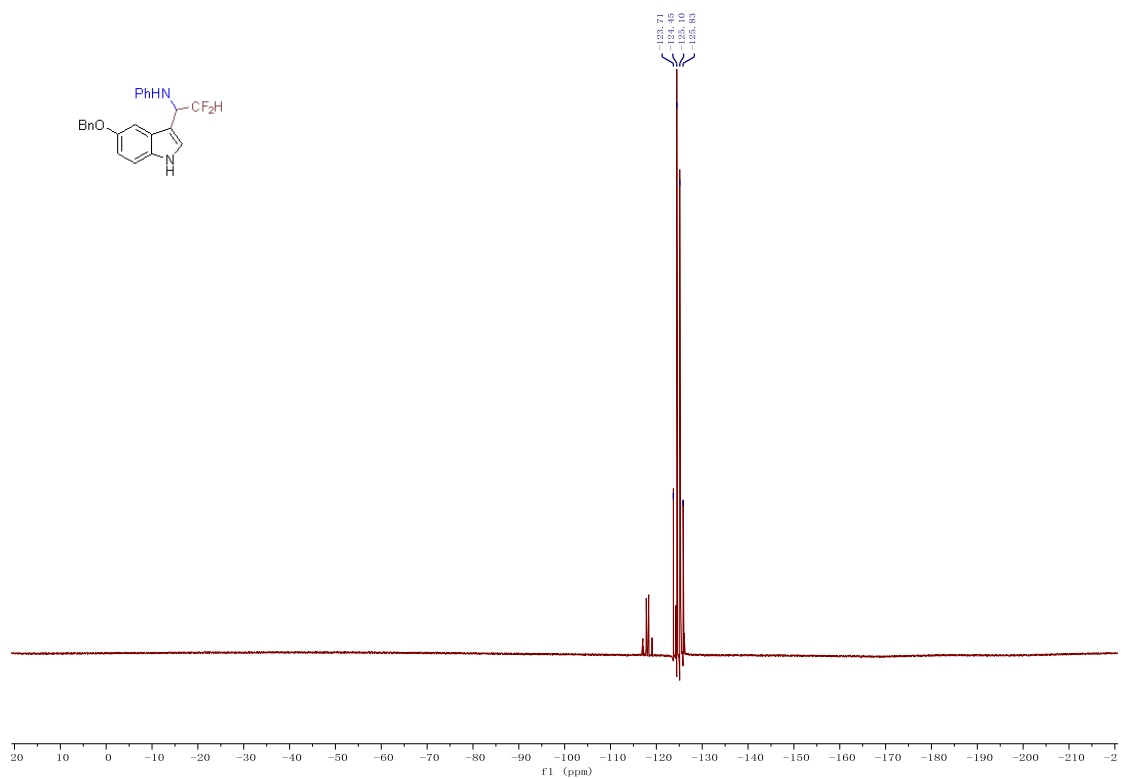

**<sup>1</sup>H NMR (400 MHz, CDCl<sub>3</sub>) spectra of **7ma****

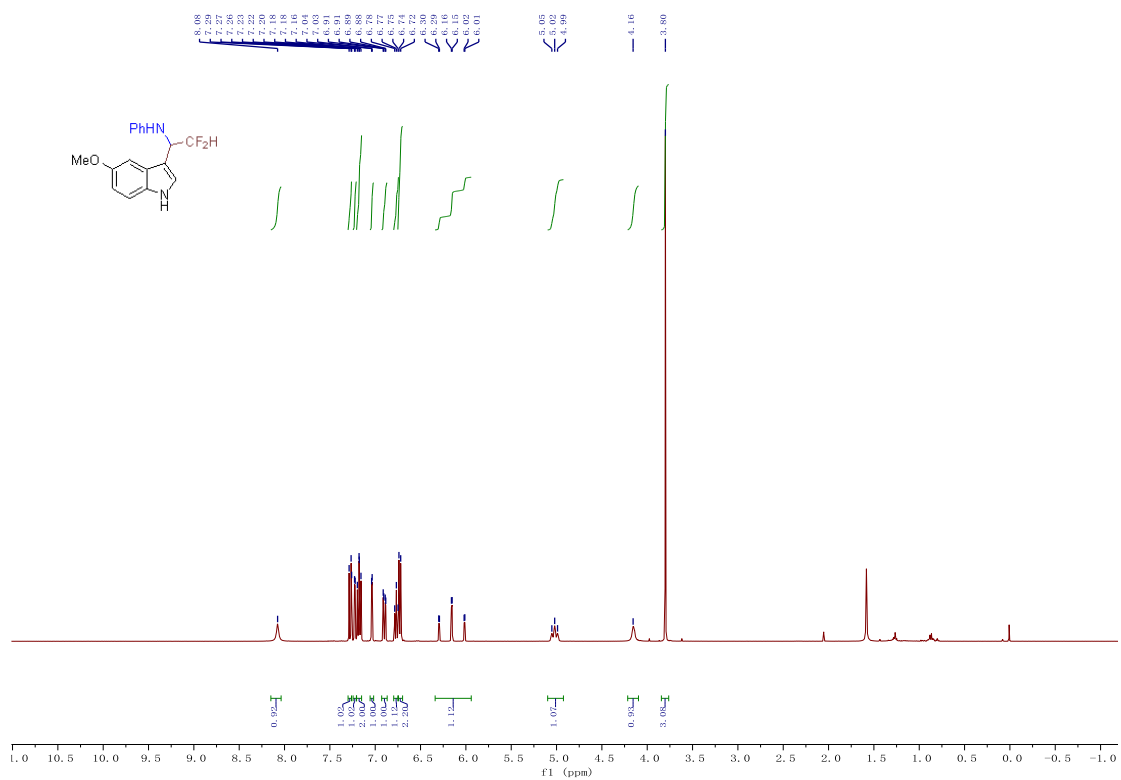

**<sup>13</sup>C NMR (101 MHz, CDCl<sub>3</sub>) spectra of **7ma****

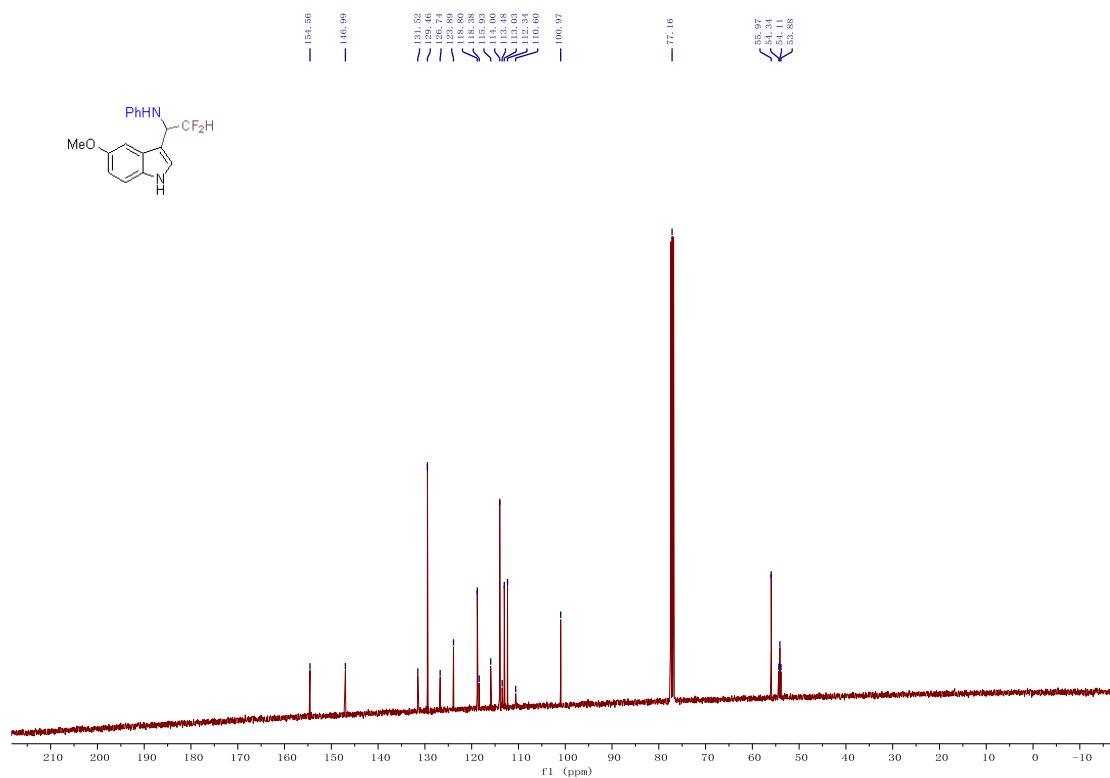

<sup>19</sup>F NMR (377 MHz, Chloroform-*d*) spectra of **7ma**

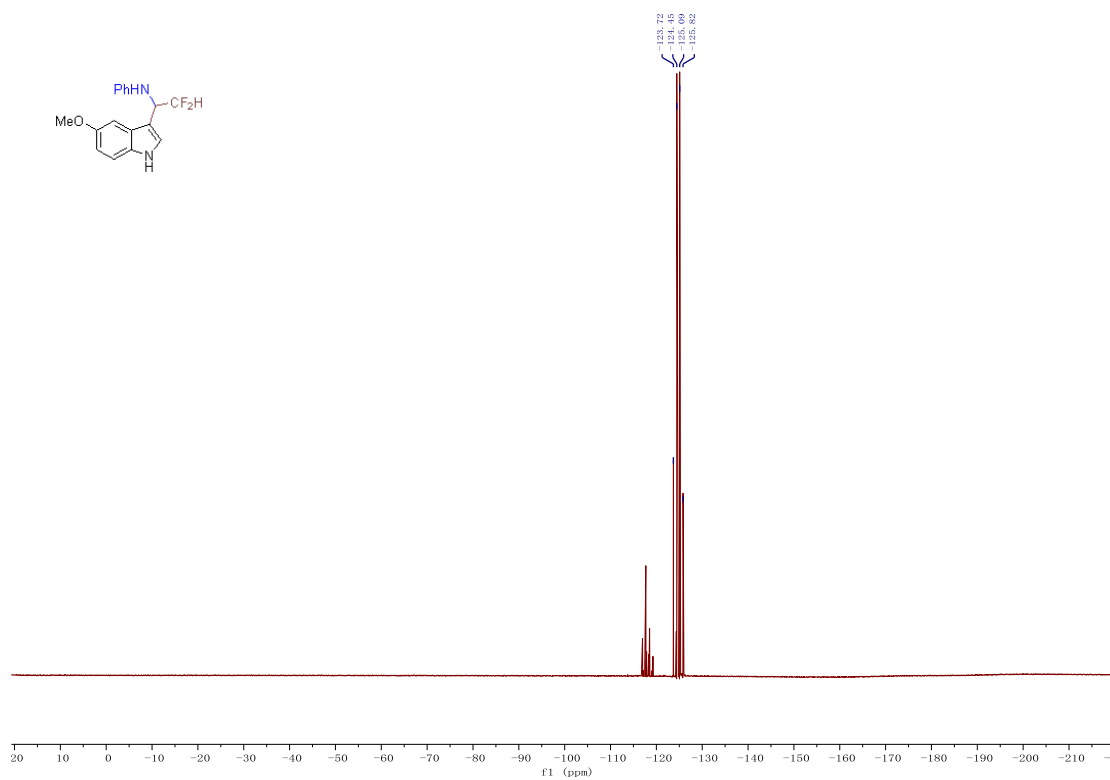

<sup>1</sup>H NMR (600 MHz, CDCl<sub>3</sub>) spectra of **7na**

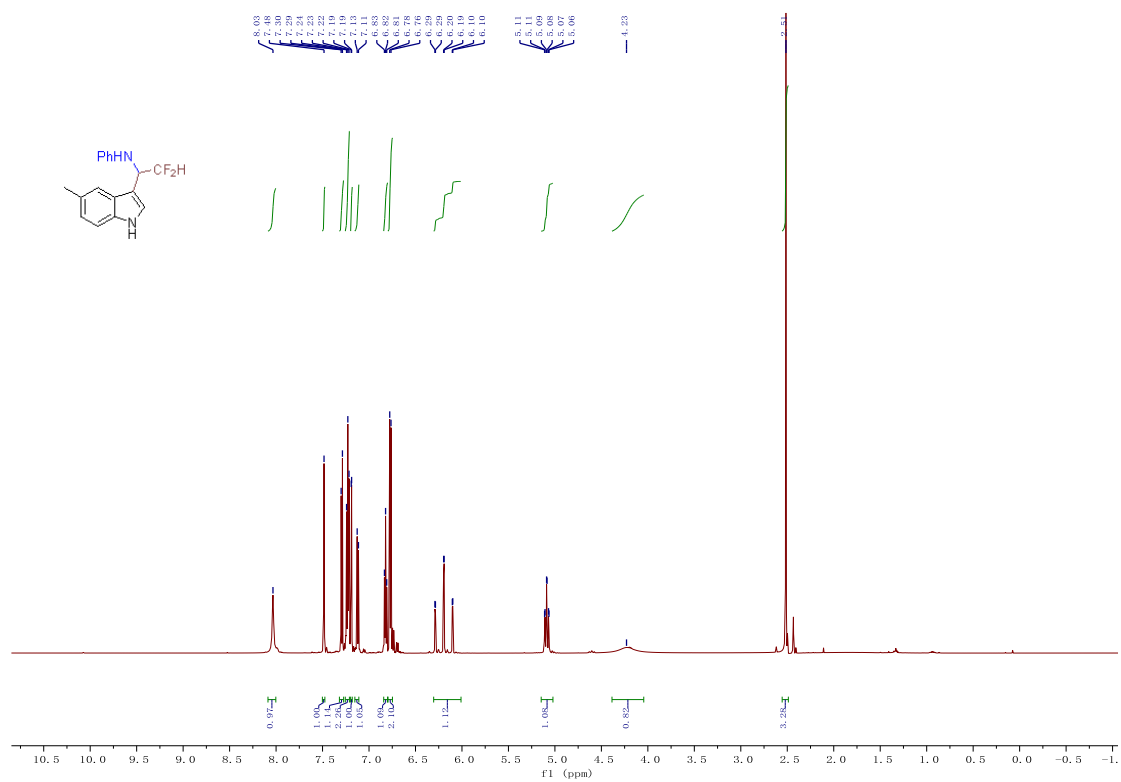

**<sup>13</sup>C NMR (151 MHz, CDCl<sub>3</sub>) spectra of 7na**

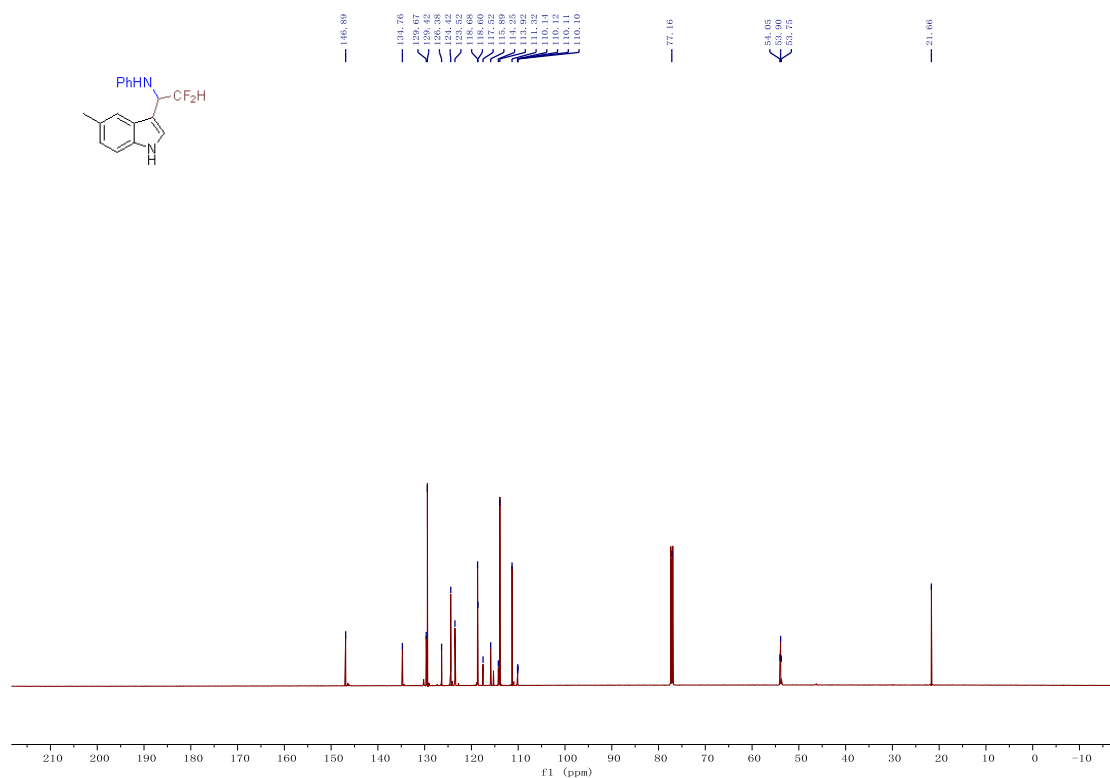

**<sup>19</sup>F NMR (377 MHz, Chloroform-*d*) spectra of 7na**



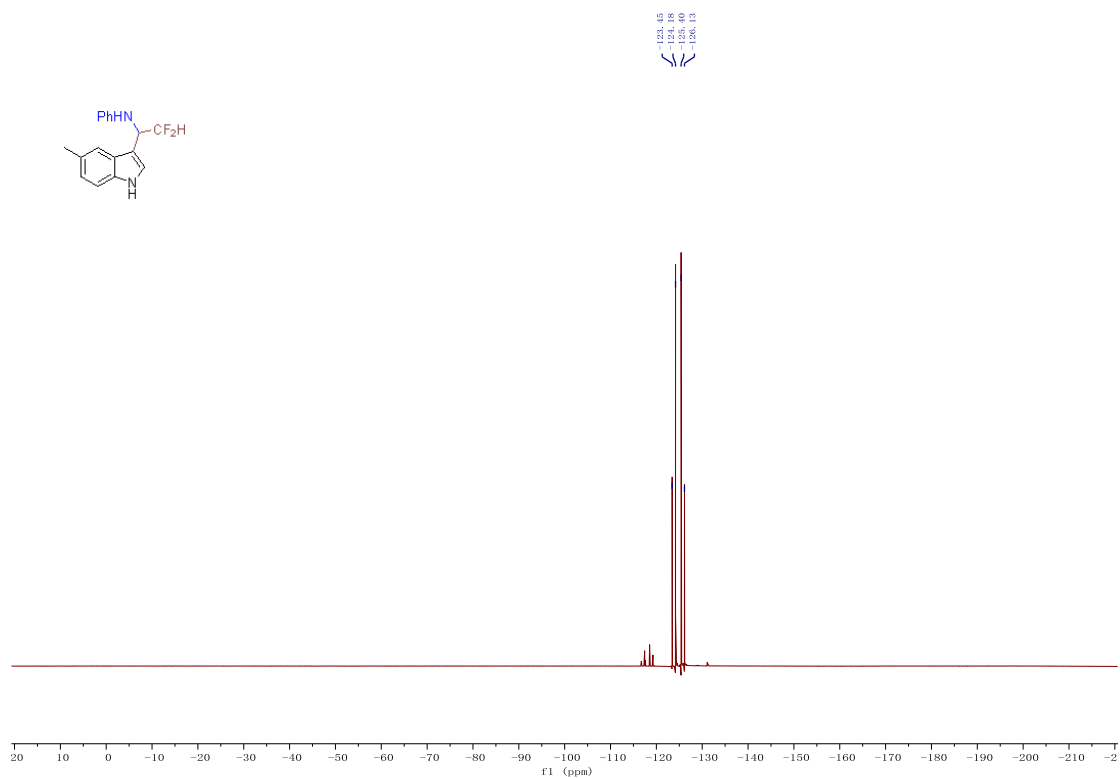

**<sup>1</sup>H NMR (600 MHz, CDCl<sub>3</sub>) spectra of 7a**

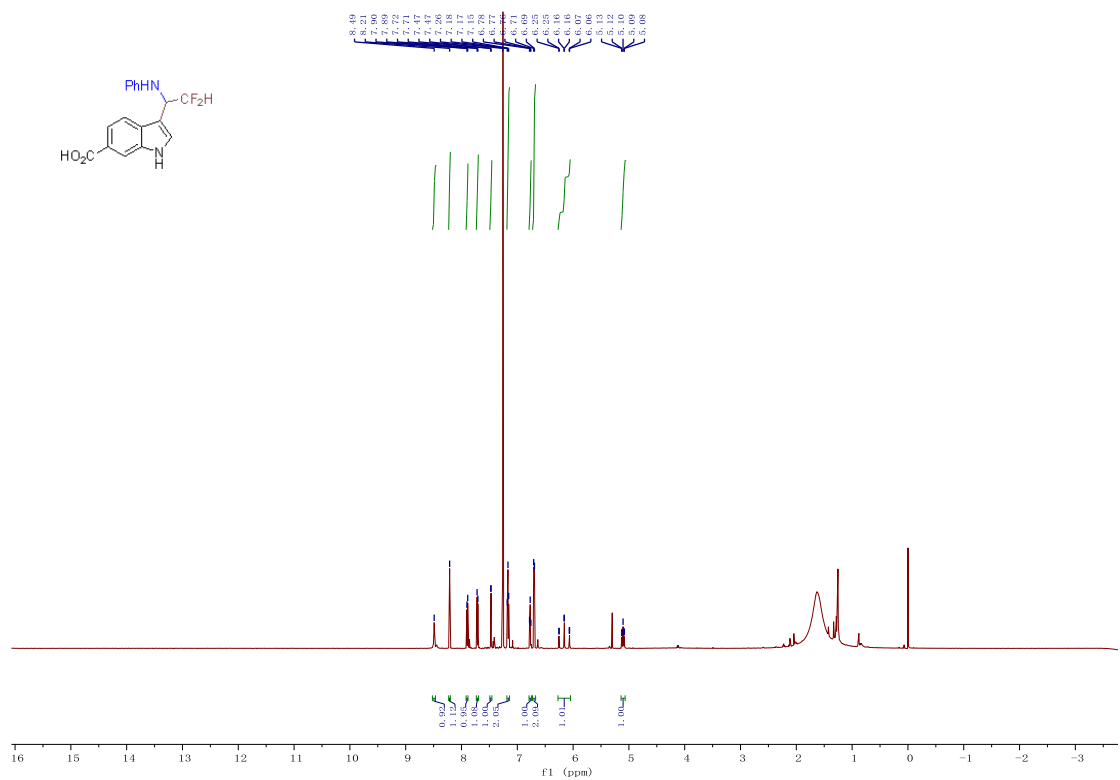

**<sup>13</sup>C NMR (151 MHz, CDCl<sub>3</sub>) spectra of 7a**

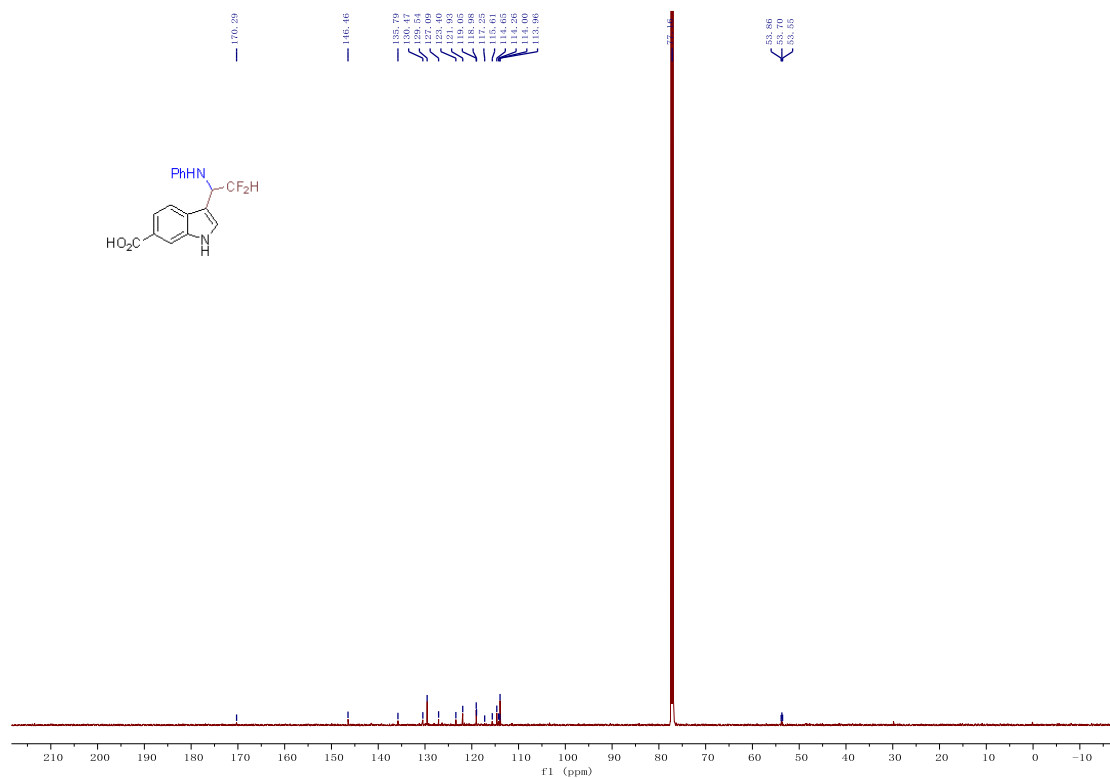

<sup>19</sup>F NMR (377 MHz, Chloroform-*d*) spectra of **7oa**

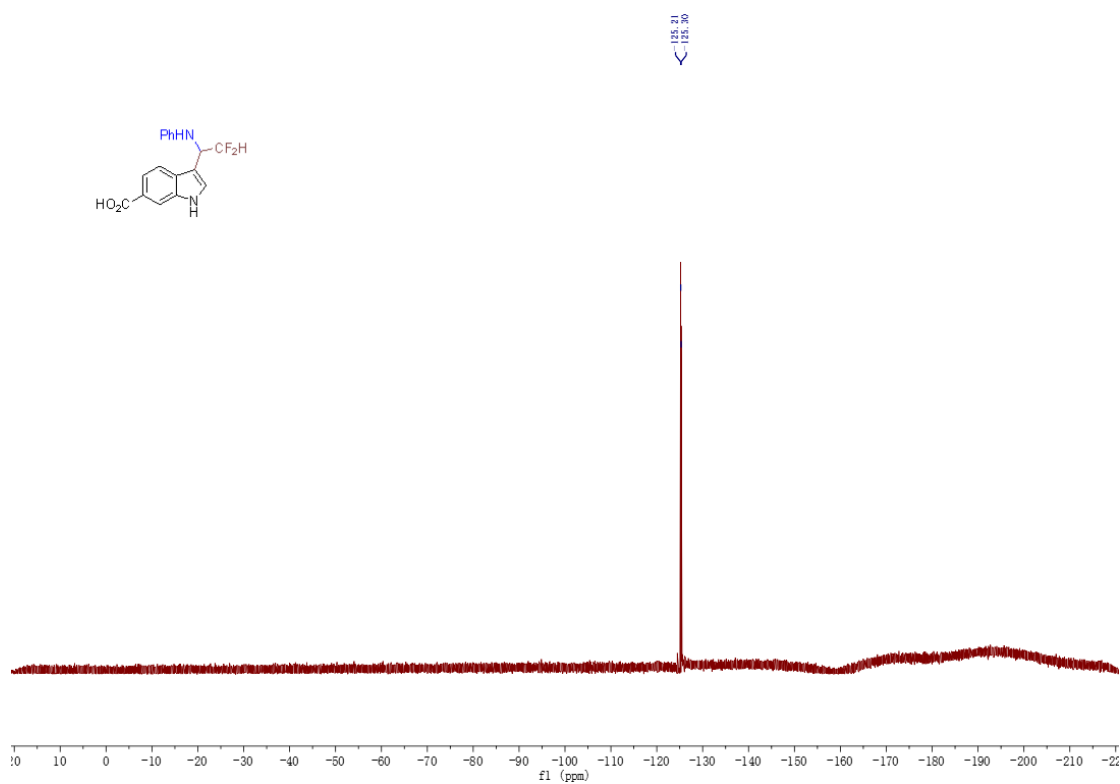

<sup>1</sup>H NMR (400 MHz, CDCl<sub>3</sub>) spectra of **7pa**

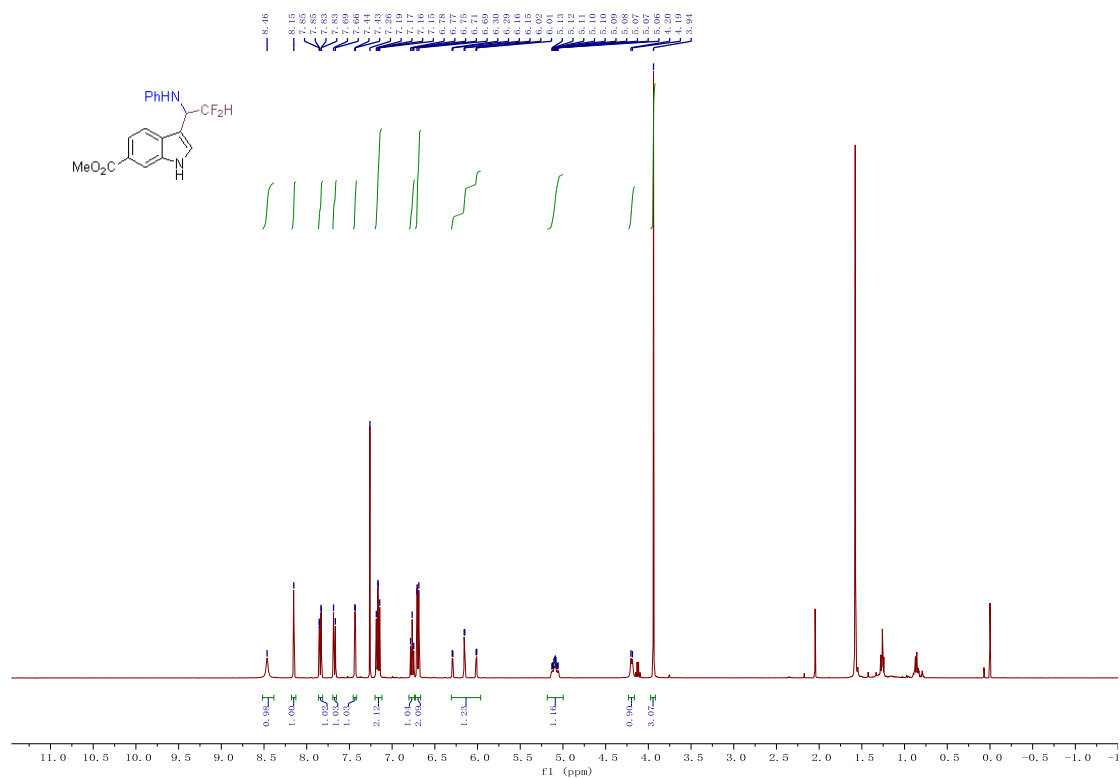

**<sup>13</sup>C NMR (101 MHz, CDCl<sub>3</sub>) spectra of **7pa****

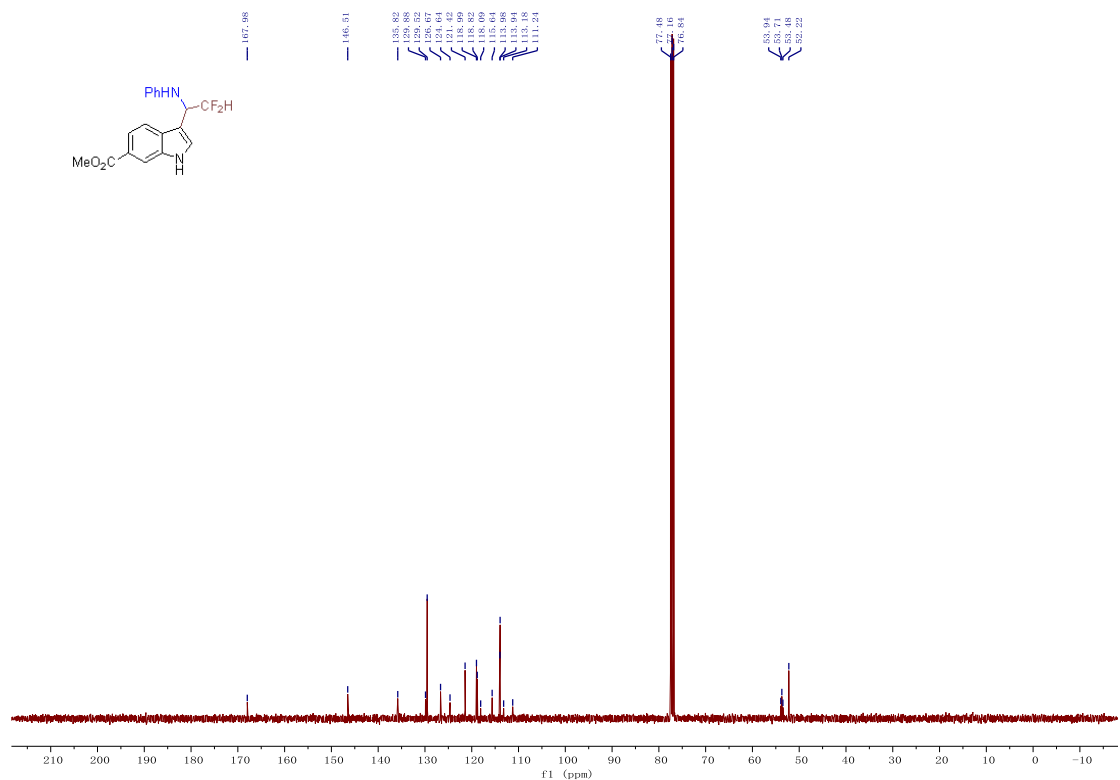

**<sup>19</sup>F NMR (377 MHz, Chloroform-*d*) spectra of **7pa****

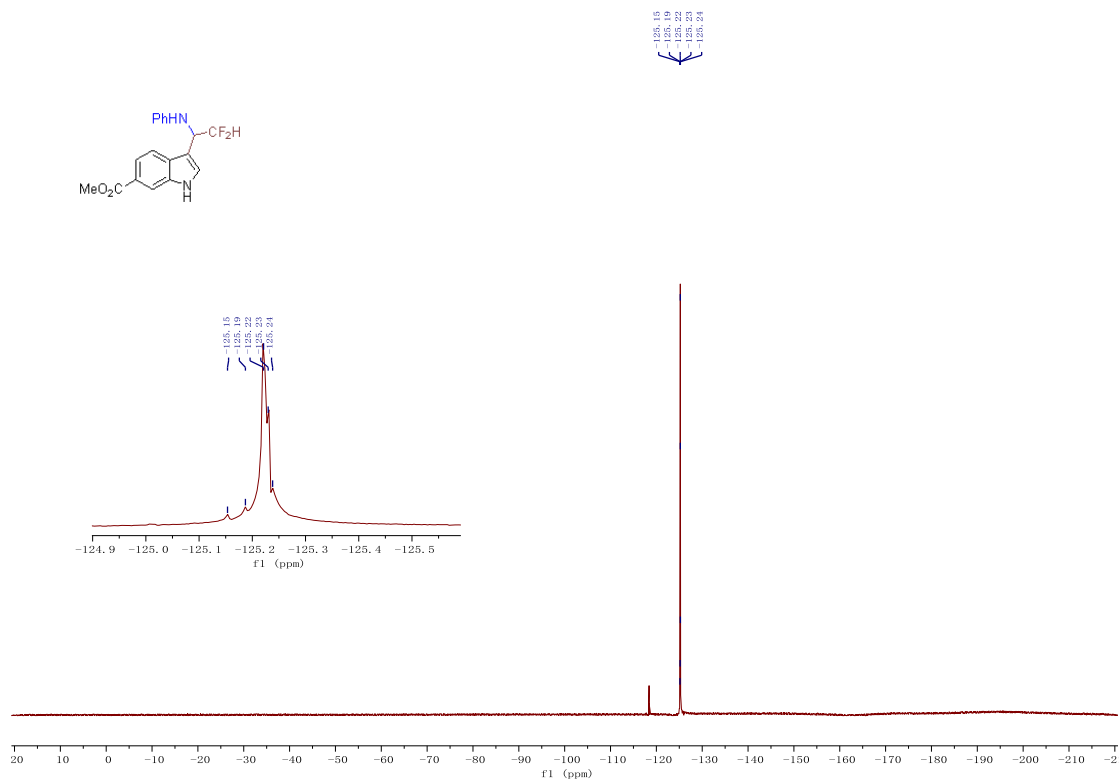

$^1\text{H}$  NMR (400 MHz,  $\text{CDCl}_3$ ) spectra of 7qa

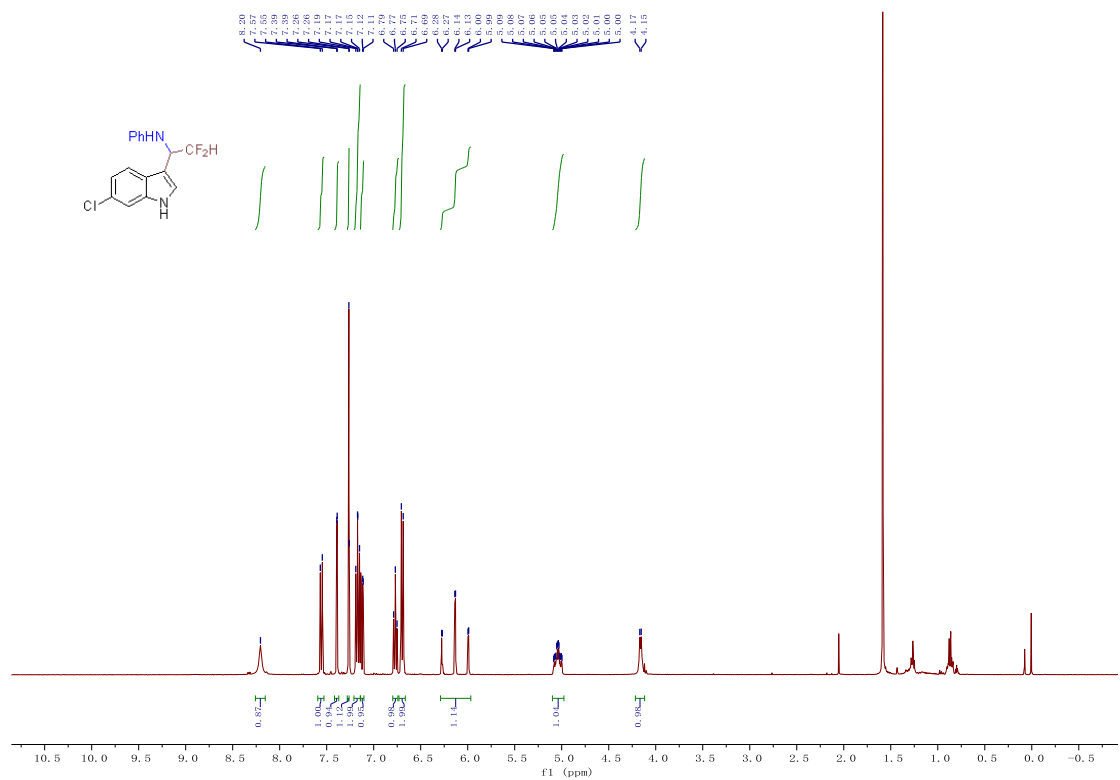

$^{13}\text{C}$  NMR (101 MHz,  $\text{CDCl}_3$ ) spectra of 7qa

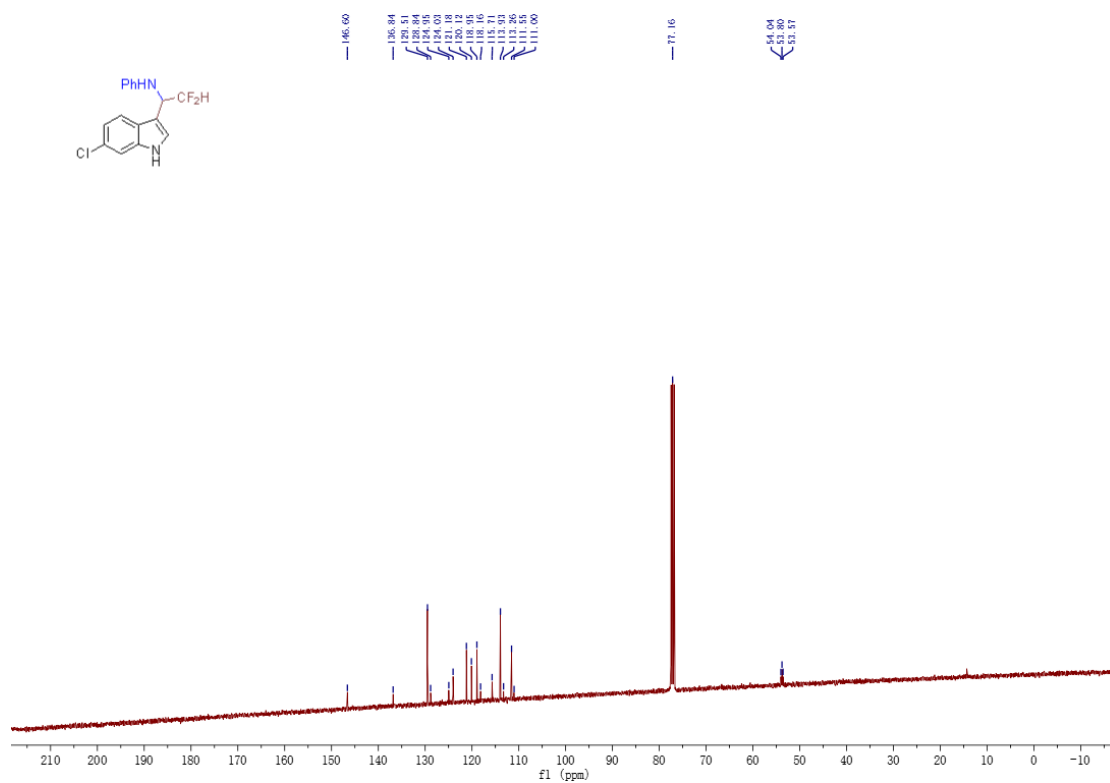

<sup>19</sup>F NMR (377 MHz, Chloroform-*d*) spectra of **7qa**

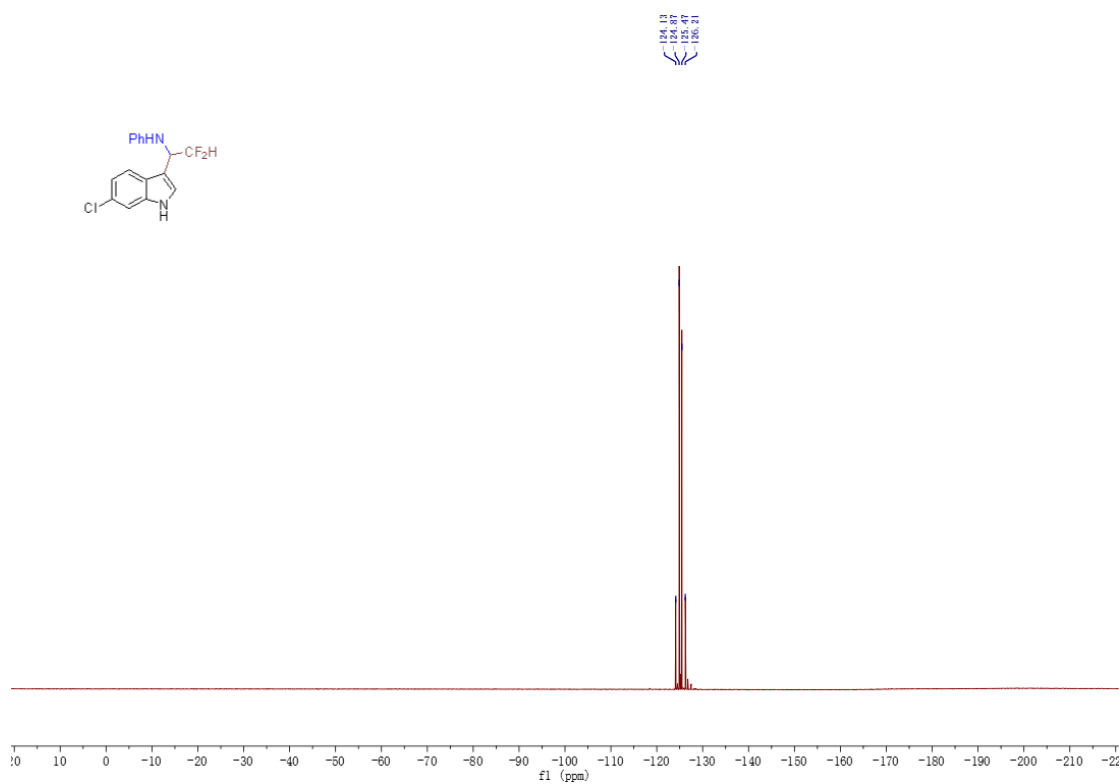

<sup>1</sup>H NMR (600 MHz, CDCl<sub>3</sub>) spectra of **7ra**

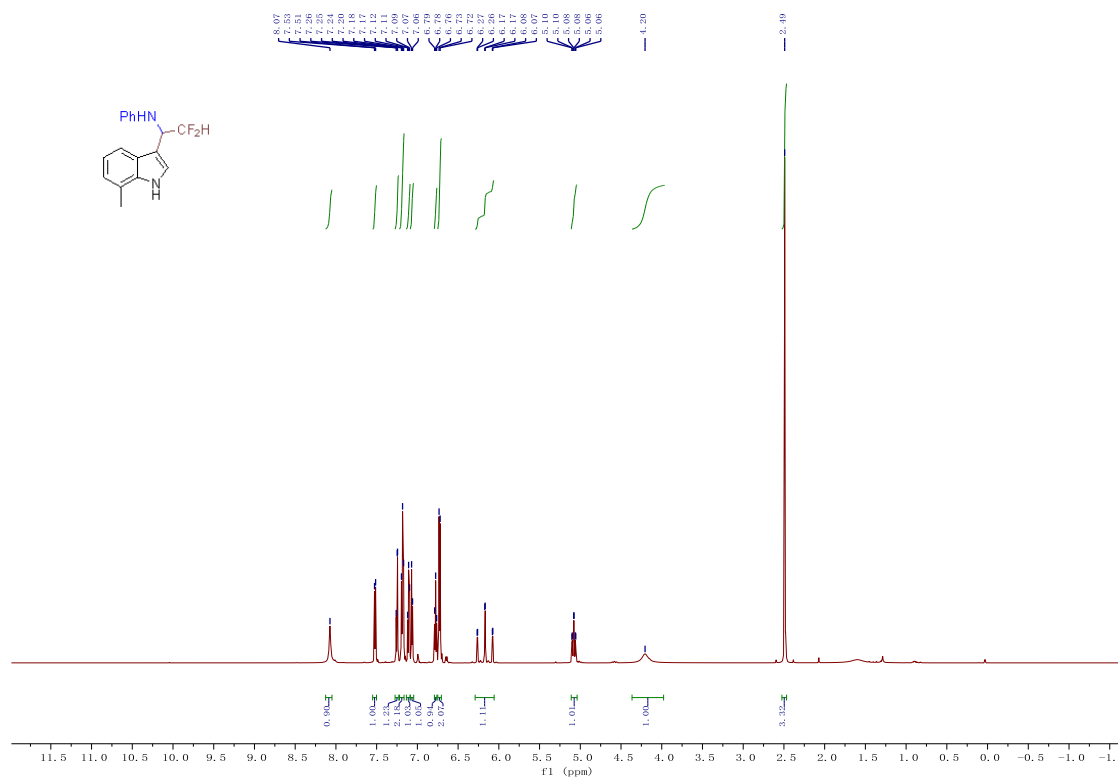

**<sup>13</sup>C NMR (151 MHz, CDCl<sub>3</sub>) spectra of **7ra****

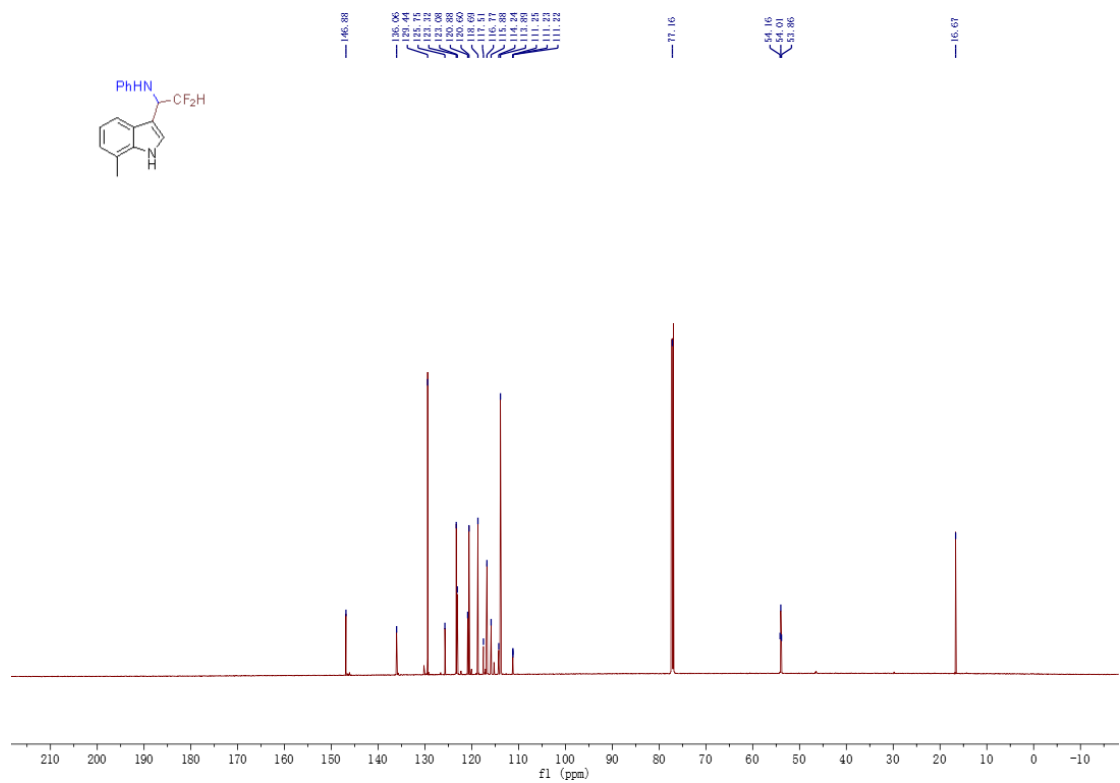

**<sup>19</sup>F NMR (377 MHz, Chloroform-*d*) spectra of **7ra****



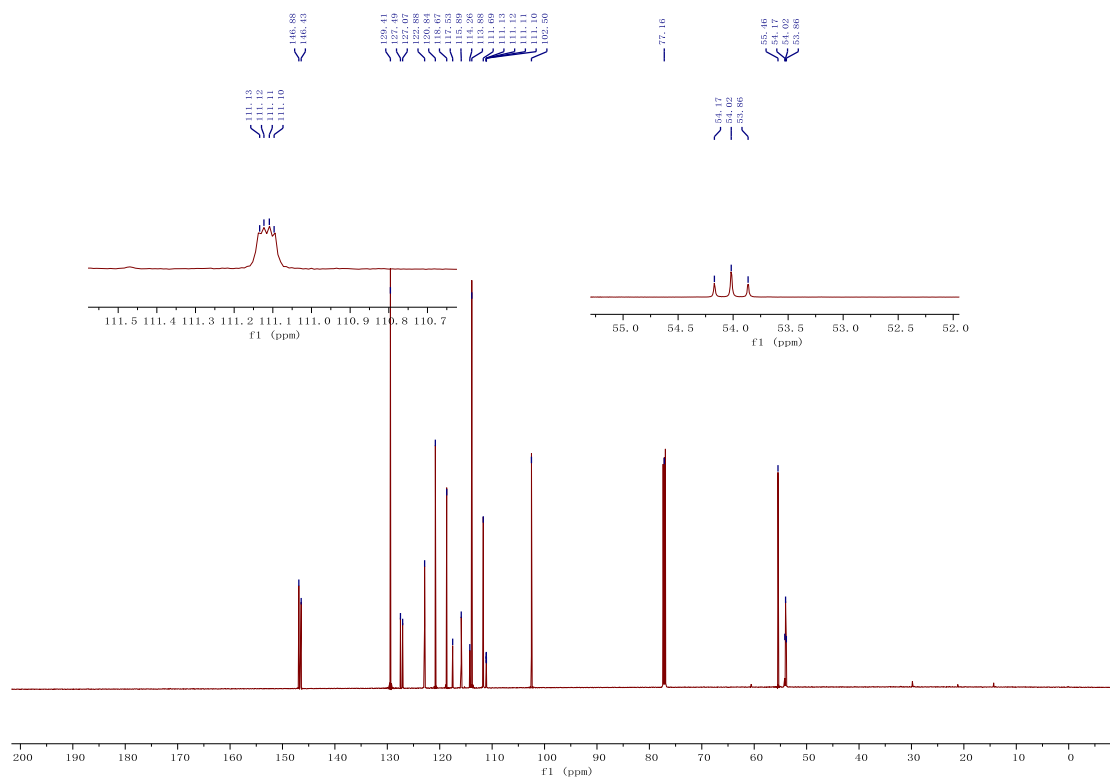

$^{19}\text{F}$  NMR (377 MHz, Chloroform-*d*) spectra of **7sa**

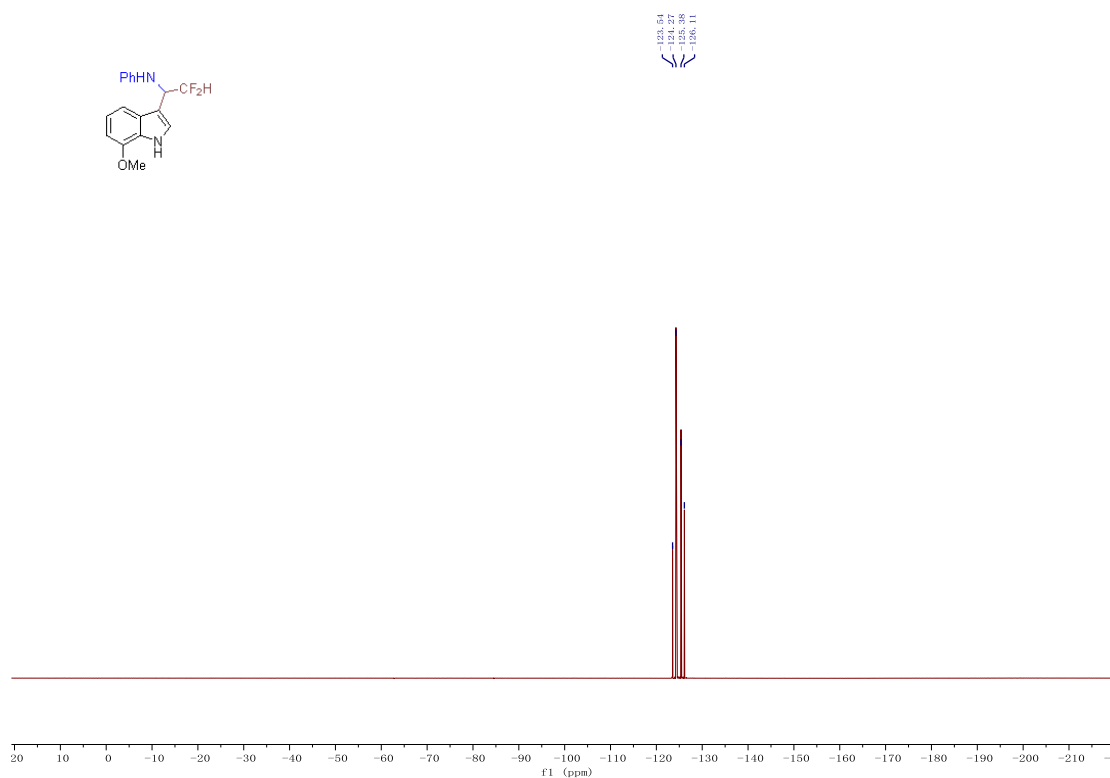

$^1\text{H}$  NMR (600 MHz,  $\text{CDCl}_3$ ) spectra of **7ta**



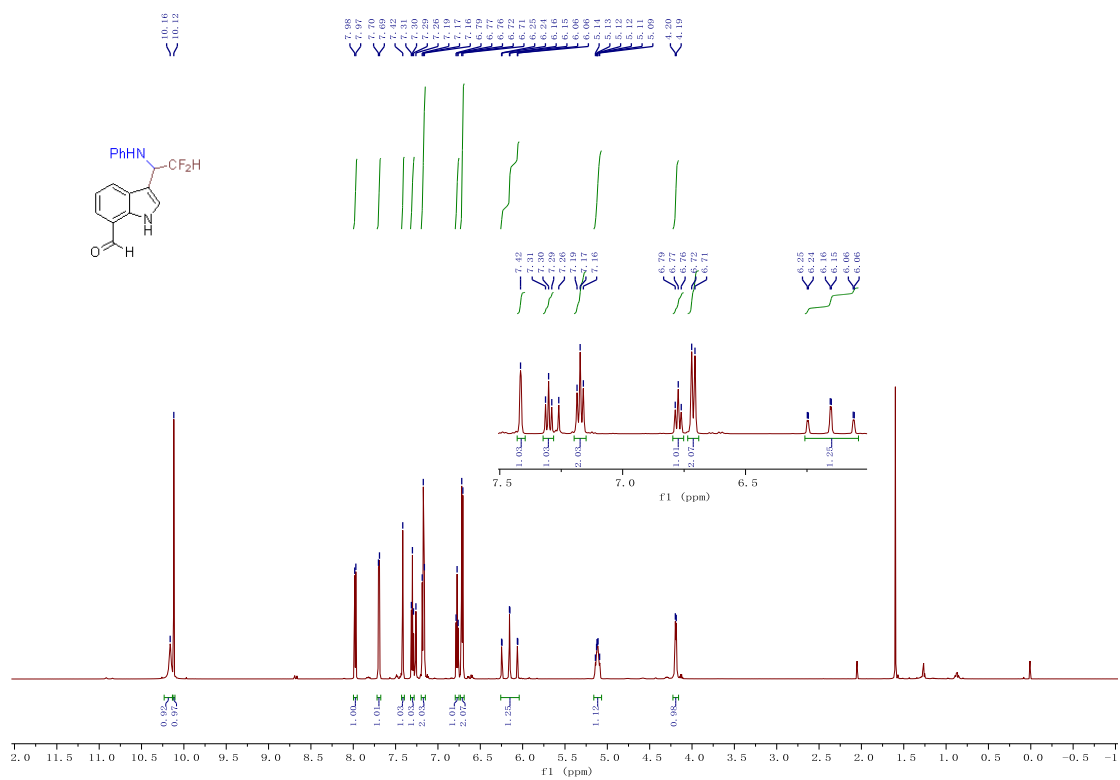

**<sup>13</sup>C NMR (151 MHz, CDCl<sub>3</sub>) spectra of 7a**

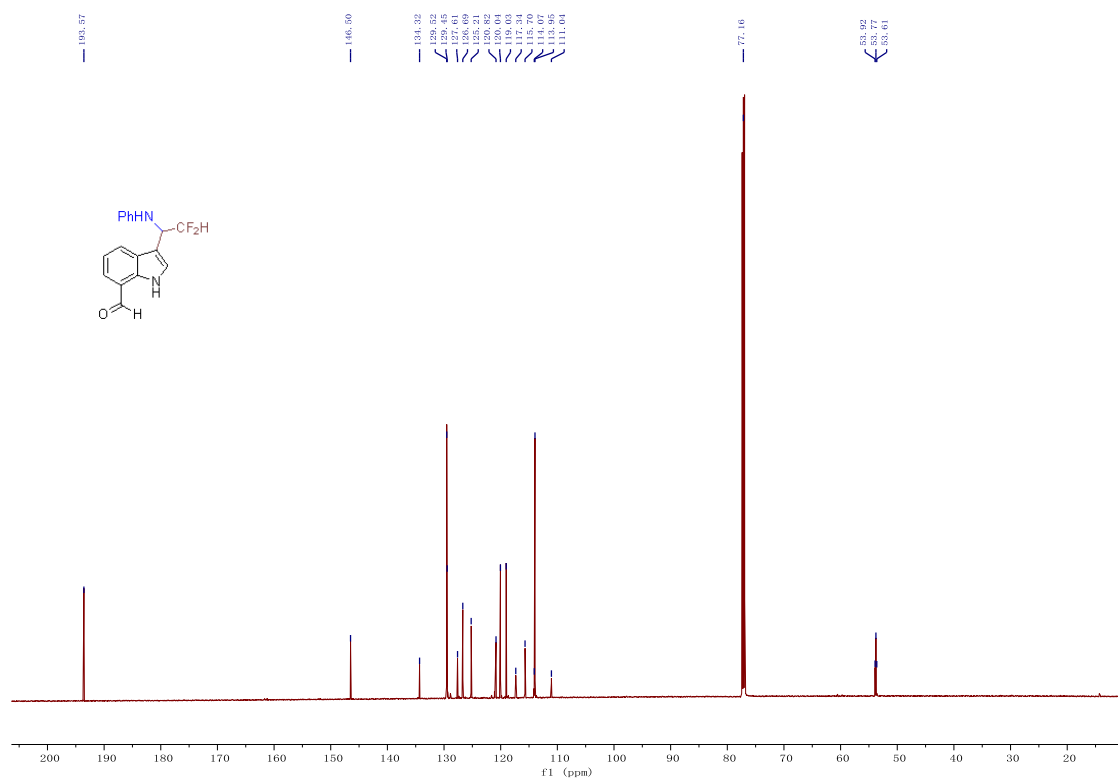

**<sup>19</sup>F NMR (377 MHz, Chloroform-*d*) spectra of 7a**

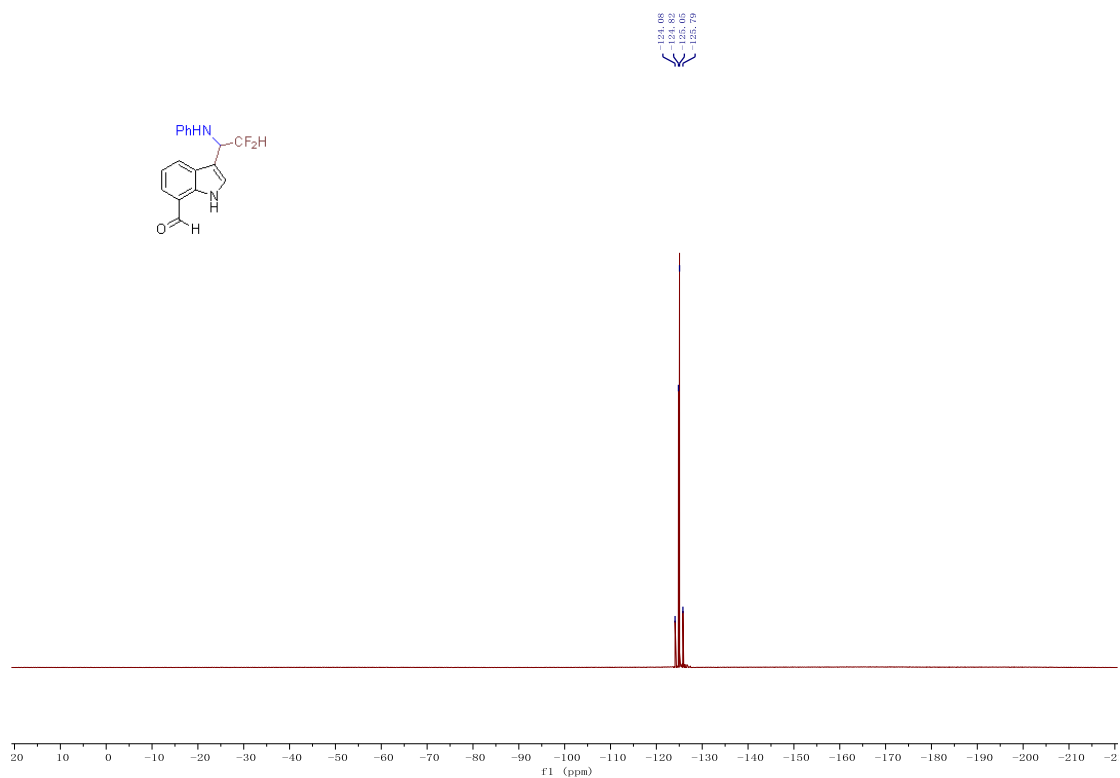

$^1\text{H}$  NMR (400 MHz,  $\text{CDCl}_3$ ) spectra of **7ua**

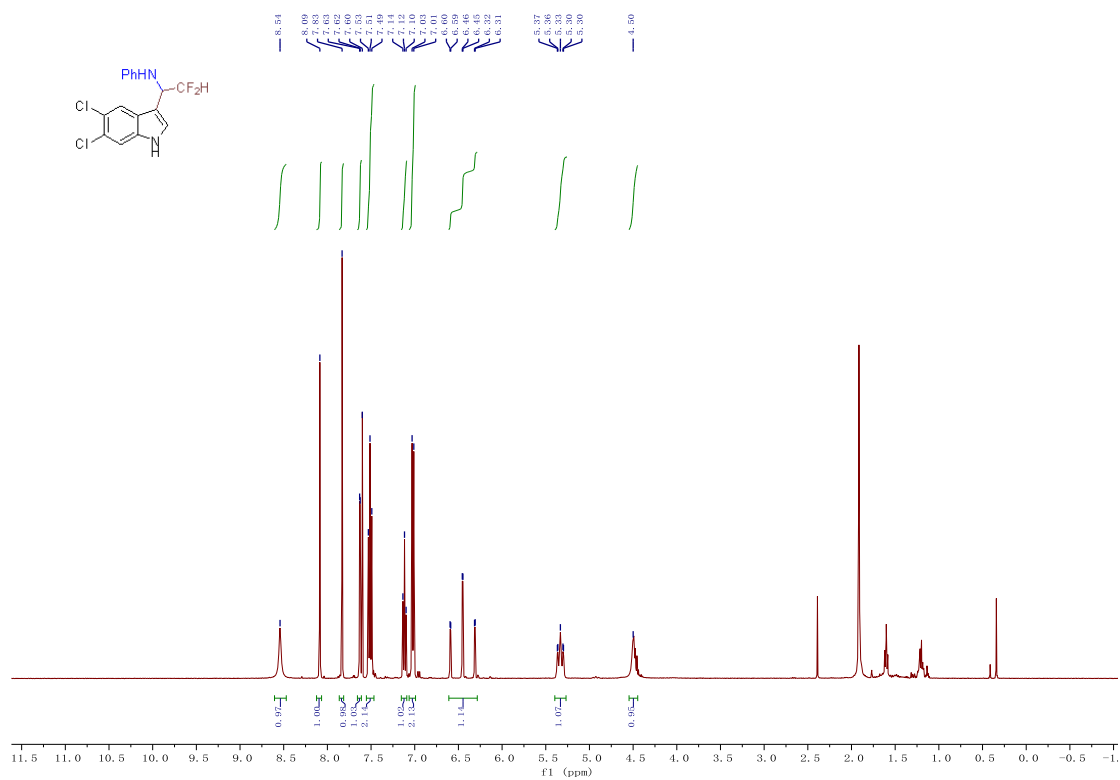

$^{13}\text{C}$  NMR (101 MHz,  $\text{CDCl}_3$ ) spectra of **7ua**

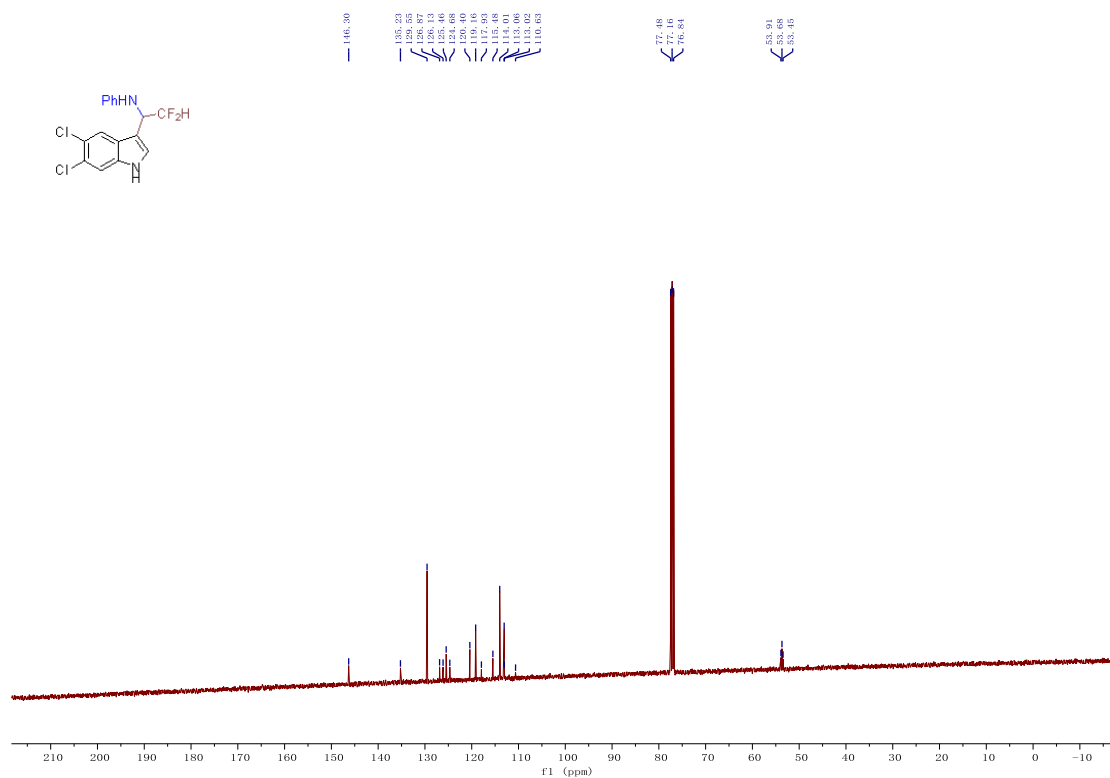

$^{19}\text{F}$  NMR (377 MHz, Chloroform-*d*) spectra of **7ua**

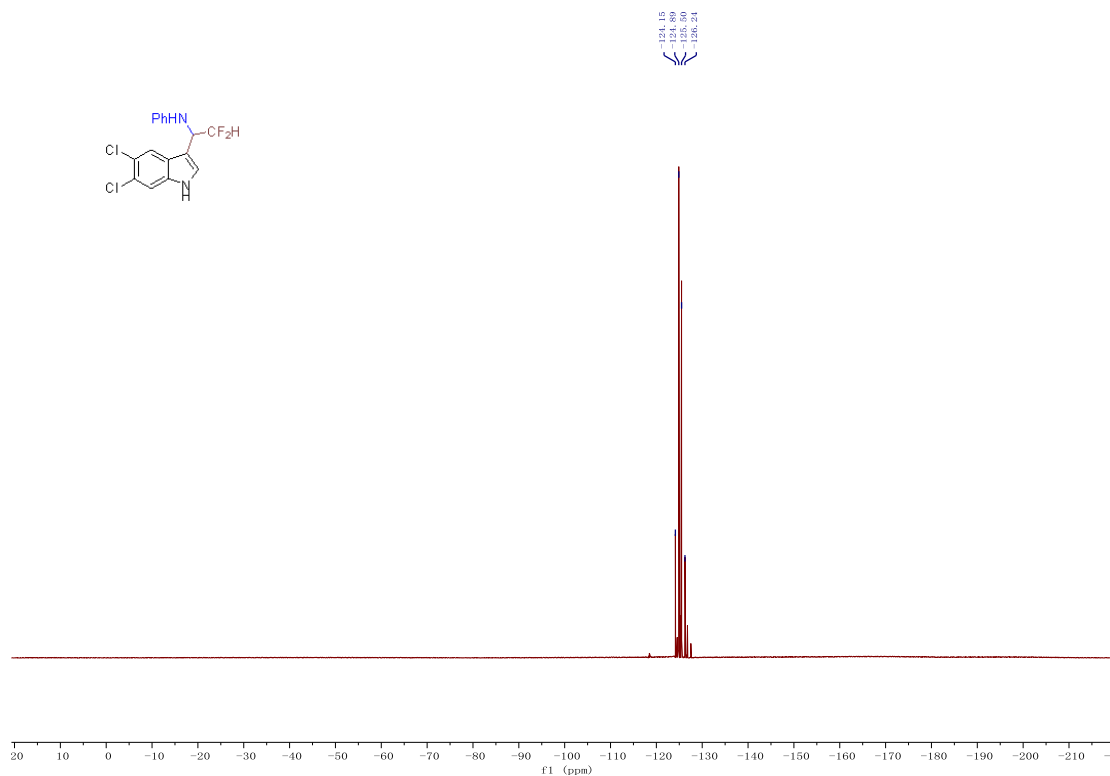

$^1\text{H}$  NMR (400 MHz,  $\text{CDCl}_3$ ) spectra of **7va**

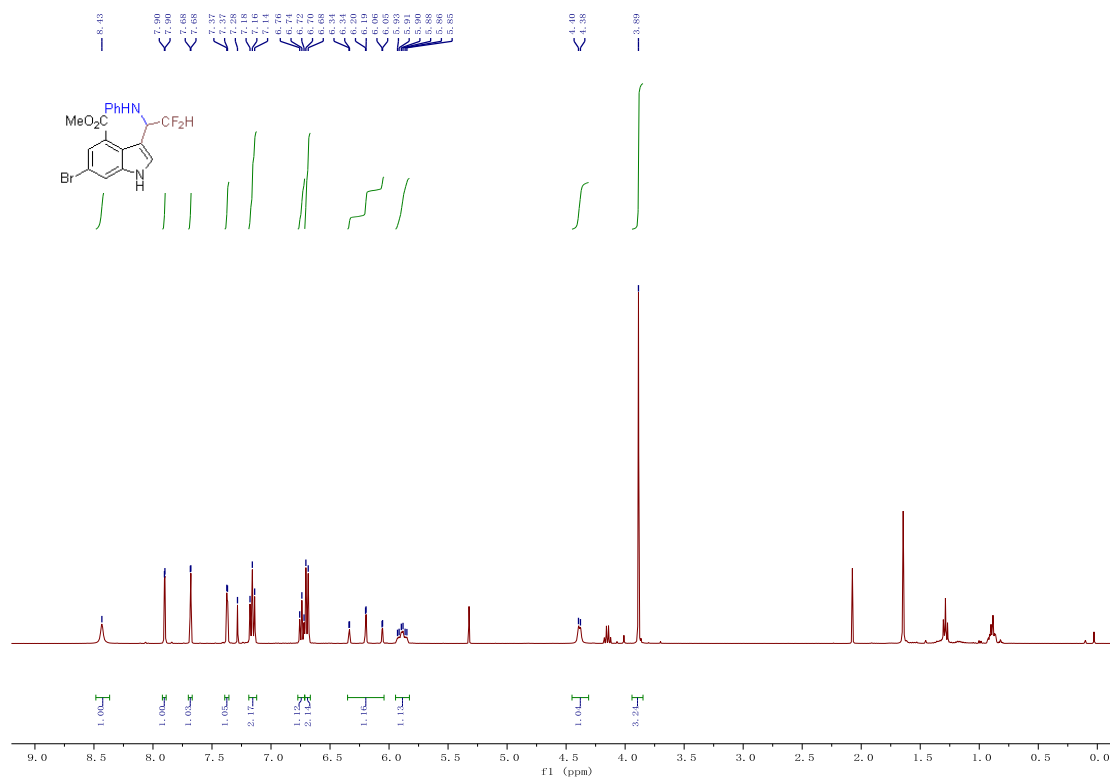

<sup>13</sup>C NMR (101 MHz, CDCl<sub>3</sub>) spectra of **7va**

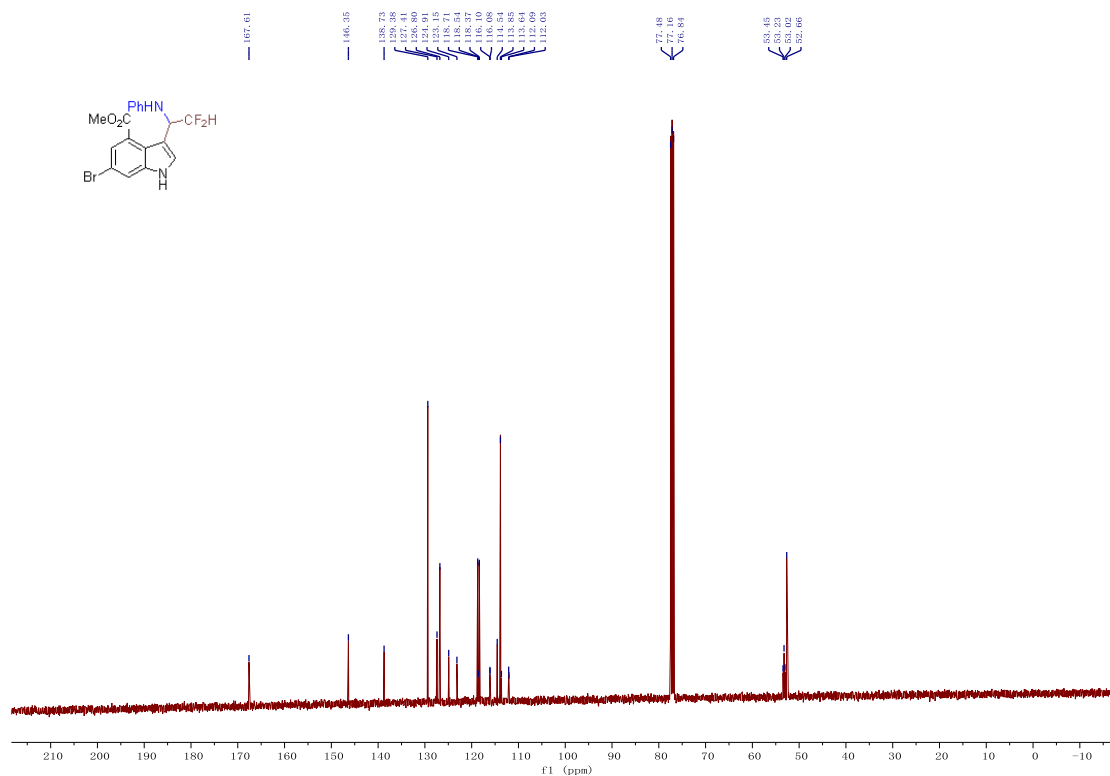

<sup>19</sup>F NMR (377 MHz, Chloroform-*d*) spectra of **7va**

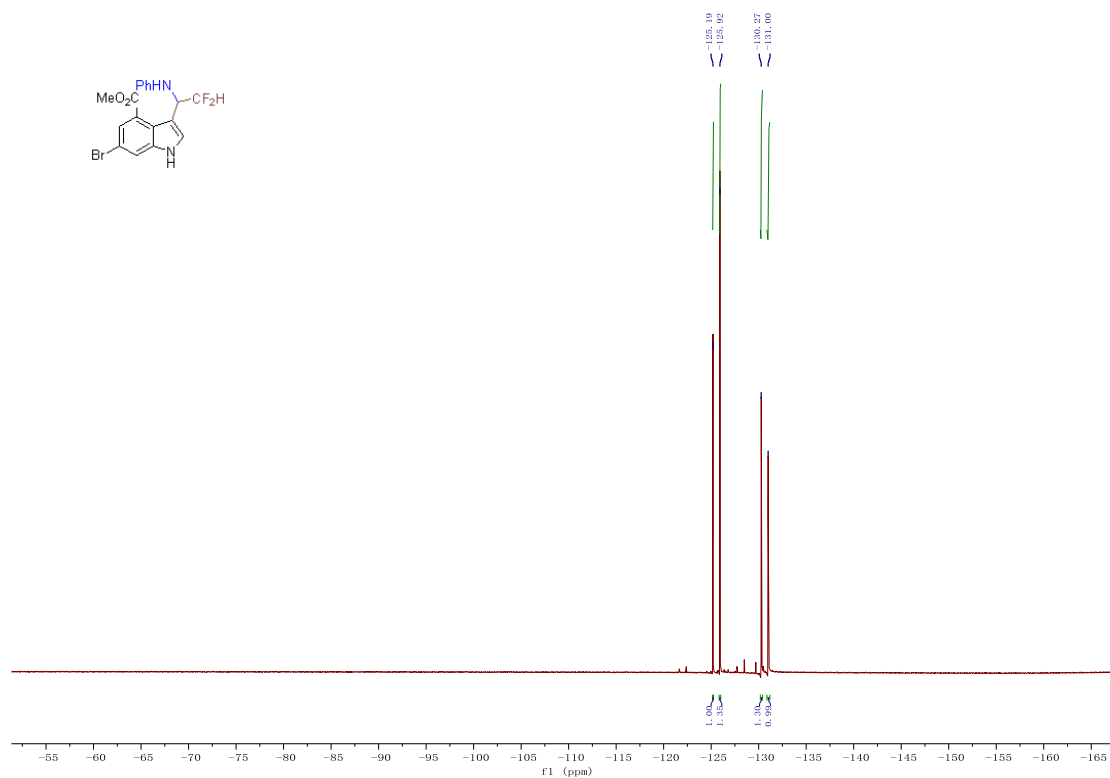

<sup>1</sup>H NMR (600 MHz, CDCl<sub>3</sub>) spectra of **7ab**

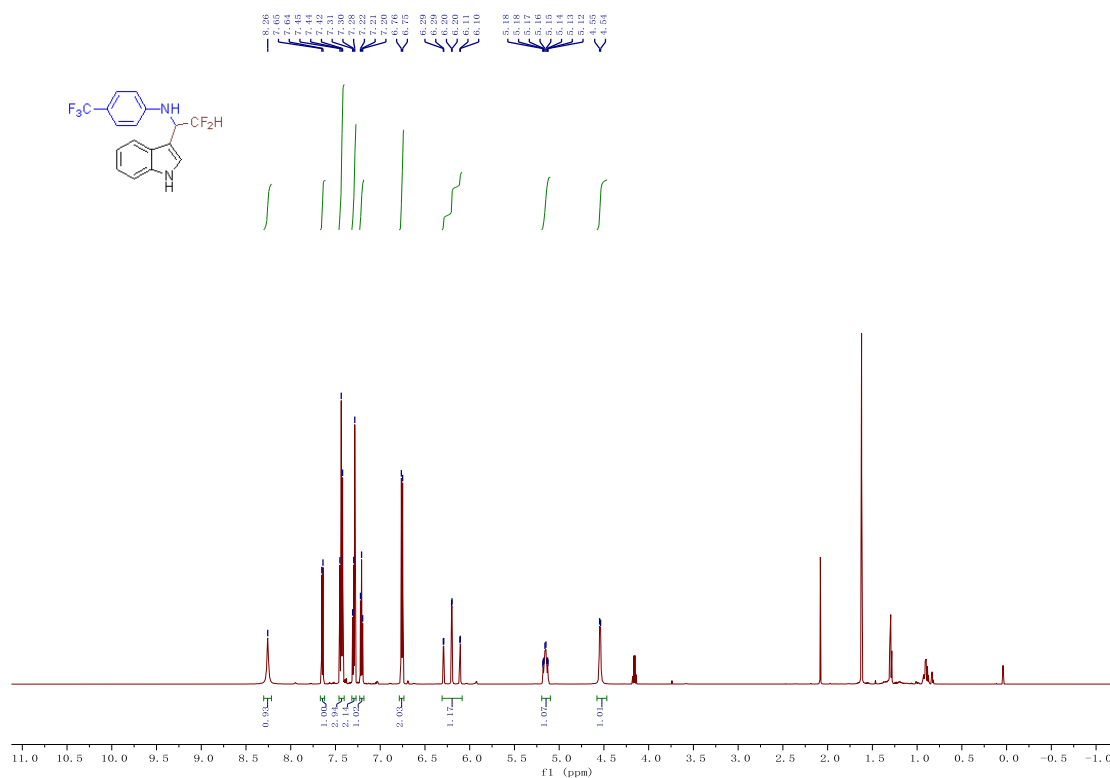

<sup>13</sup>C NMR (151 MHz, CDCl<sub>3</sub>) spectra of **7ab**

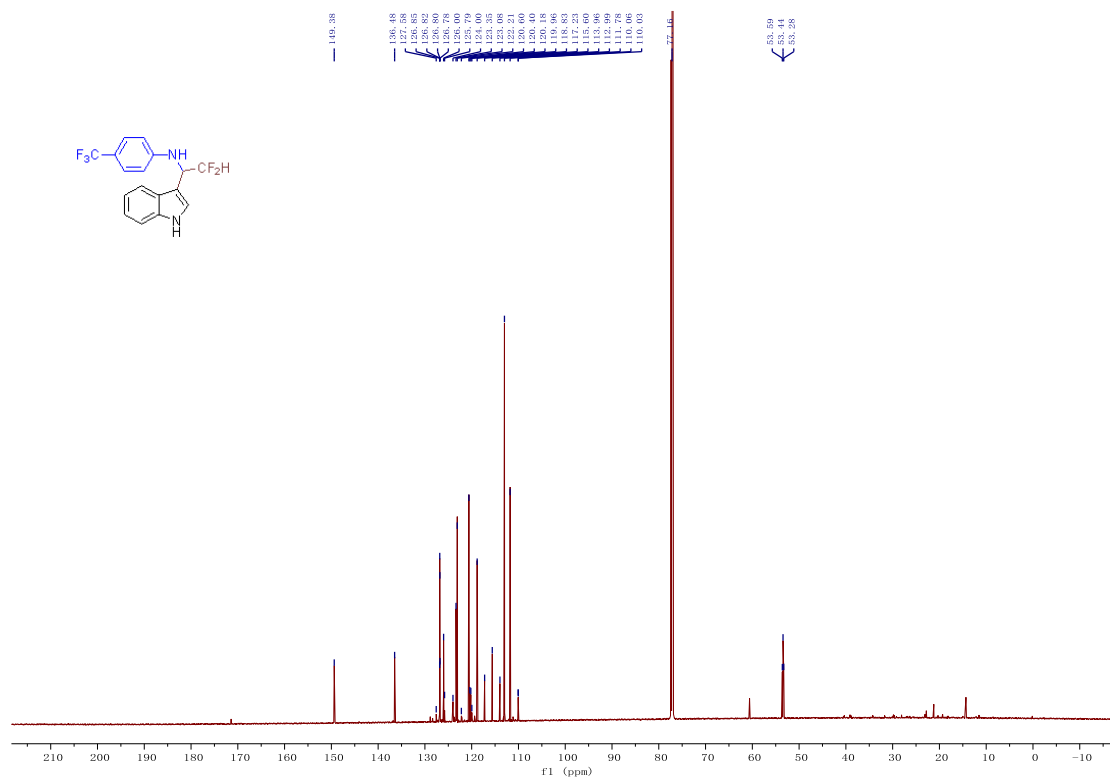

$^{19}\text{F}$  NMR (377 MHz, Chloroform-*d*) spectra of **7ab**

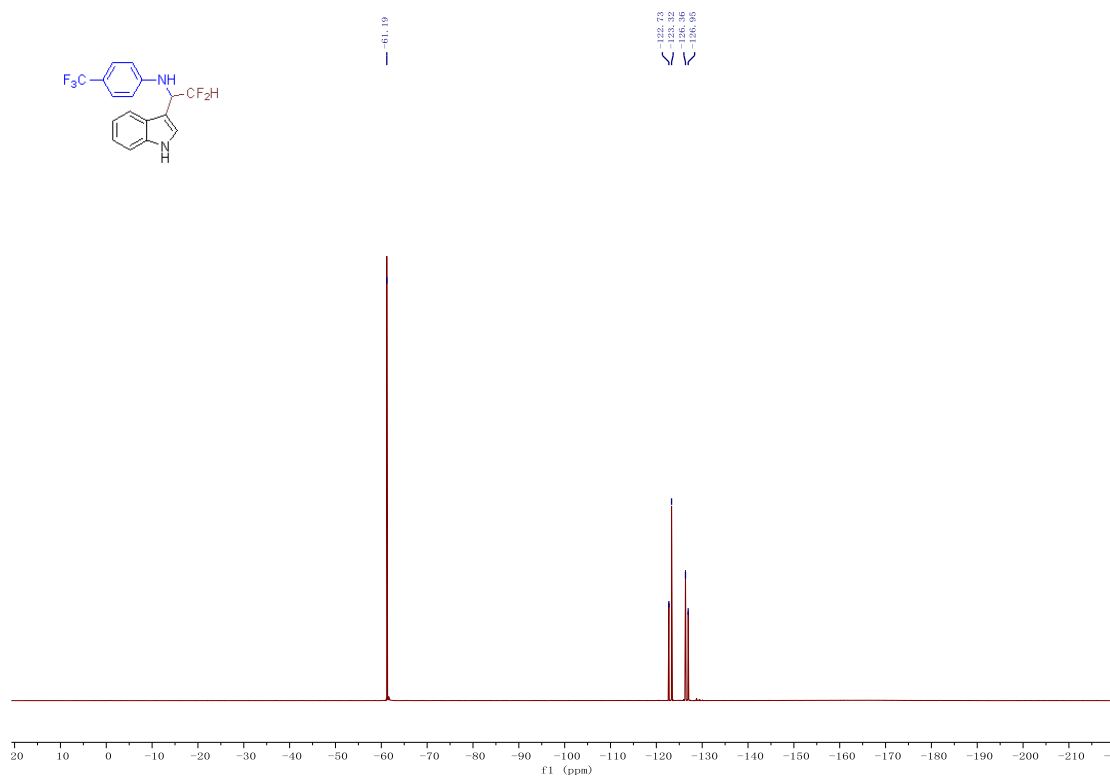

$^1\text{H}$  NMR (600 MHz, CDCl<sub>3</sub>) spectra of **7ac**

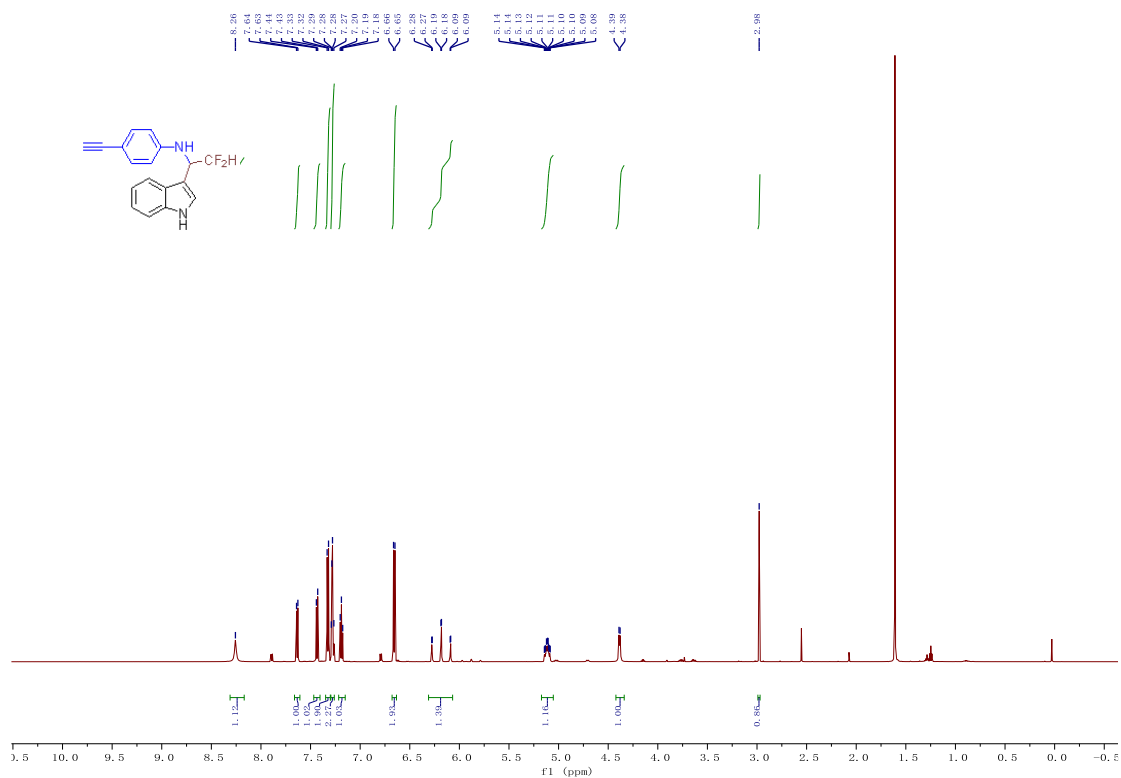

**<sup>13</sup>C NMR (151 MHz, CDCl<sub>3</sub>) spectra of 7ac**

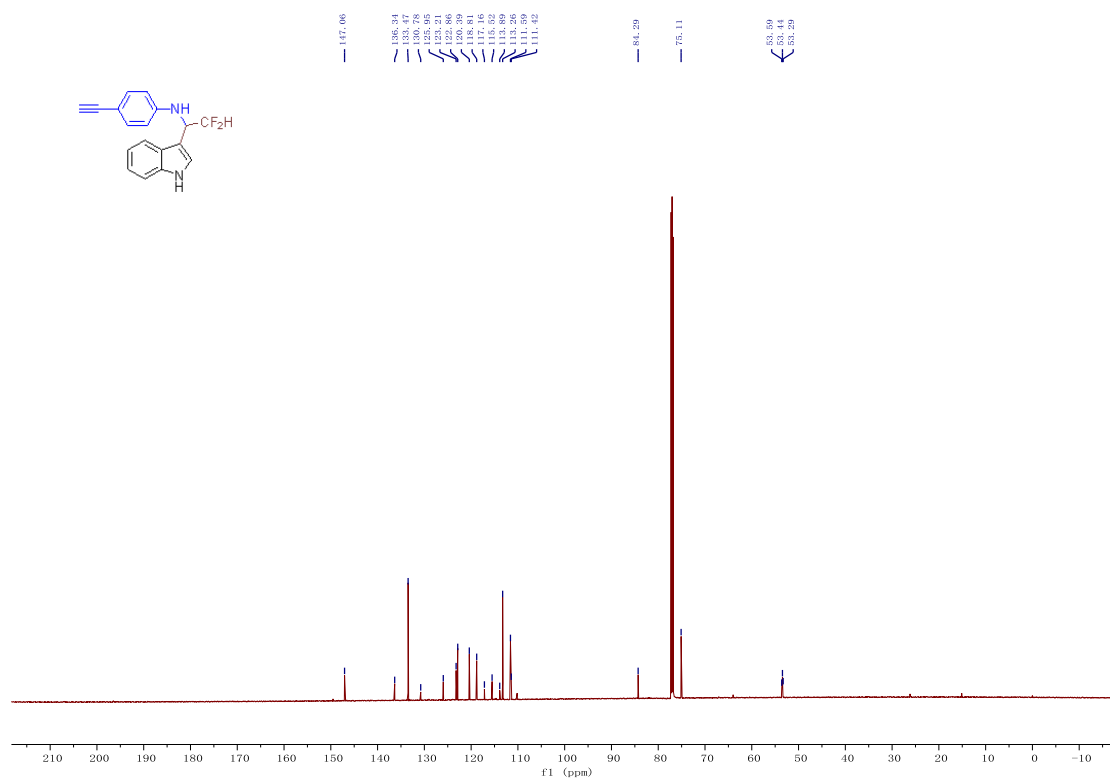

**<sup>19</sup>F NMR (377 MHz, Chloroform-*d*) spectra of 7ac**





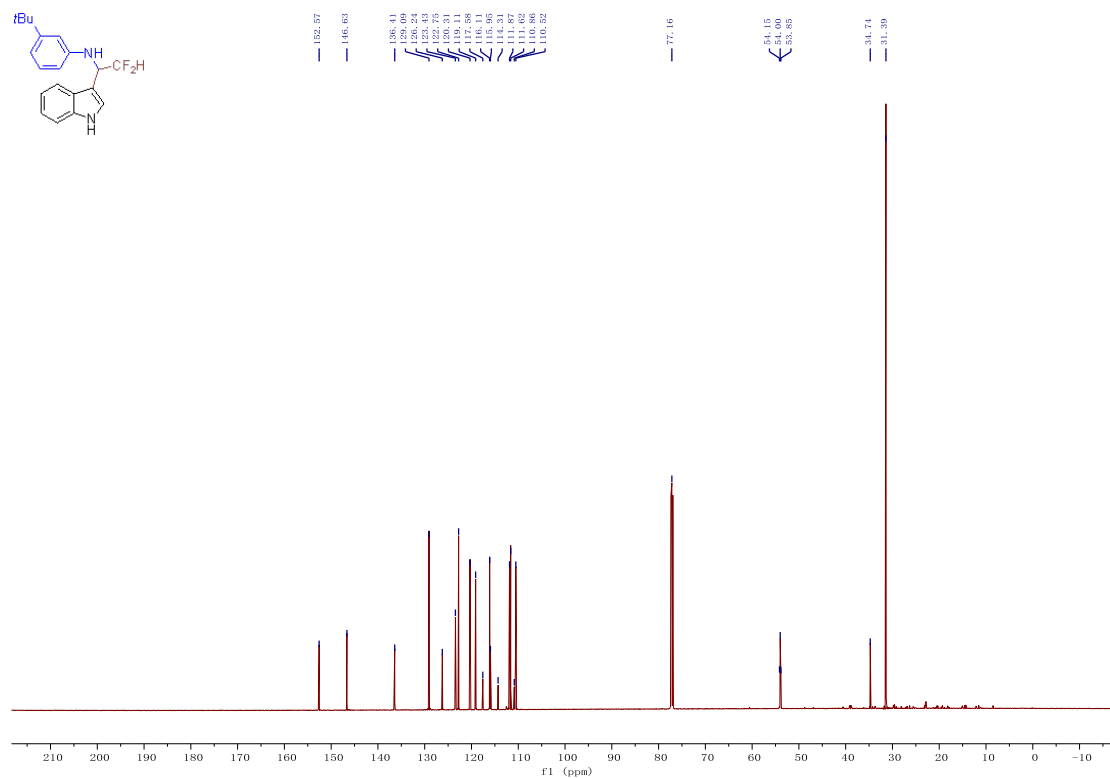

**<sup>19</sup>F NMR (377 MHz, Chloroform-*d*) spectra of **7ad****

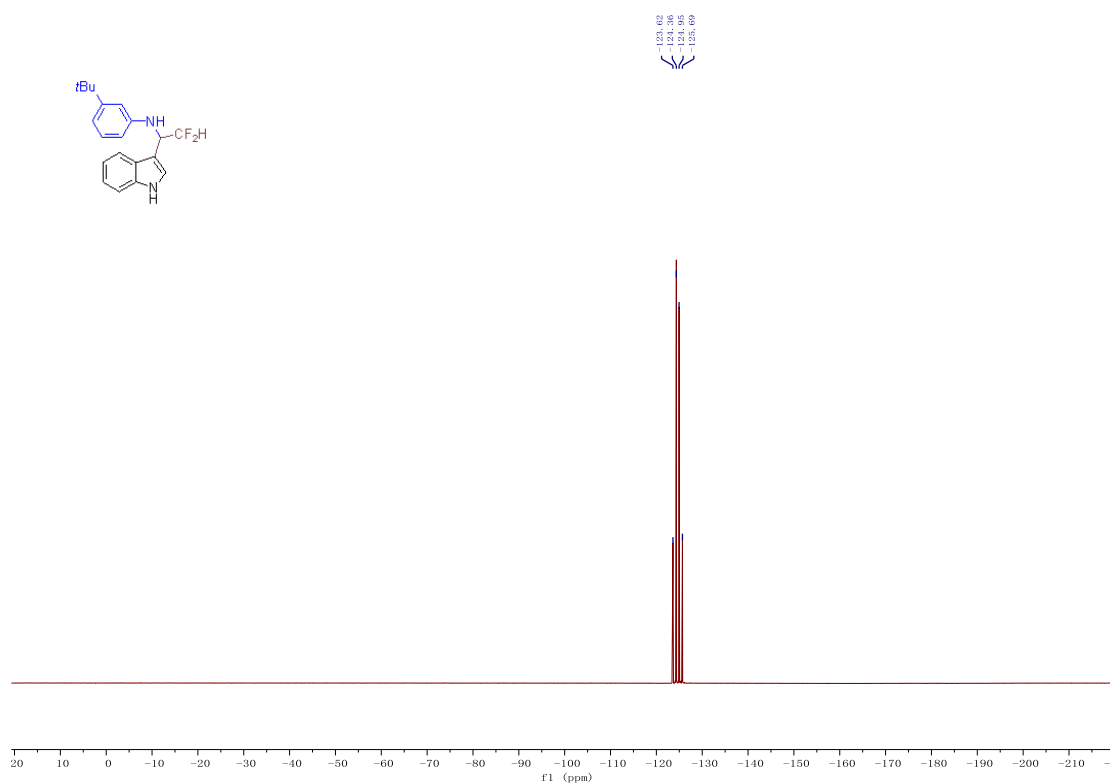

**<sup>1</sup>H NMR (400 MHz, CDCl<sub>3</sub>) spectra of **7ae****

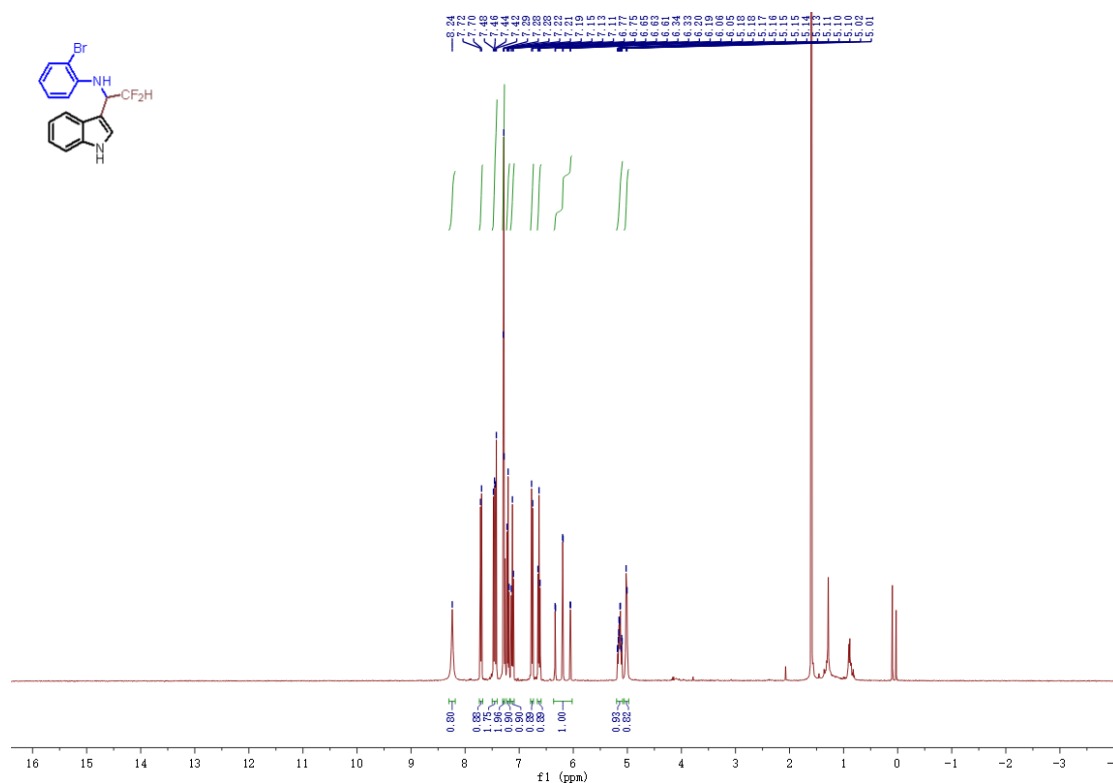

$^{13}\text{C}$  NMR (151 MHz,  $\text{CDCl}_3$ ) spectra of **7ae**

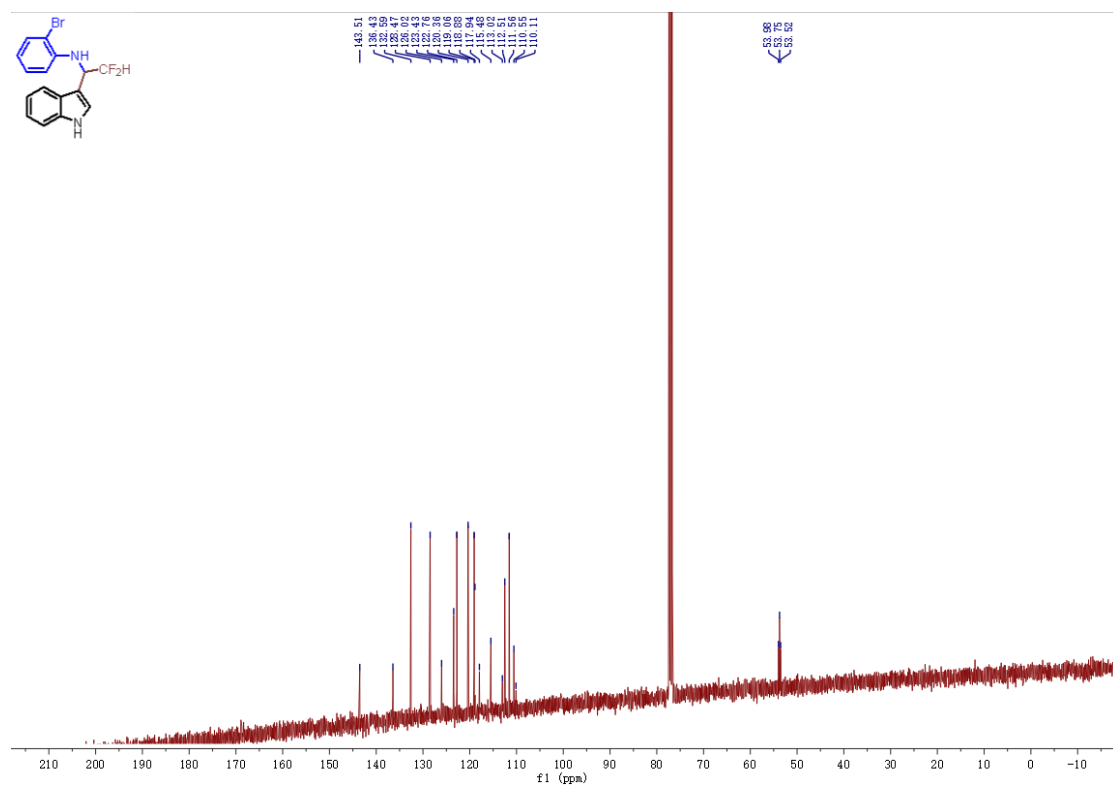

$^{19}\text{F}$  NMR (377 MHz, Chloroform-*d*) spectra of **7ae**

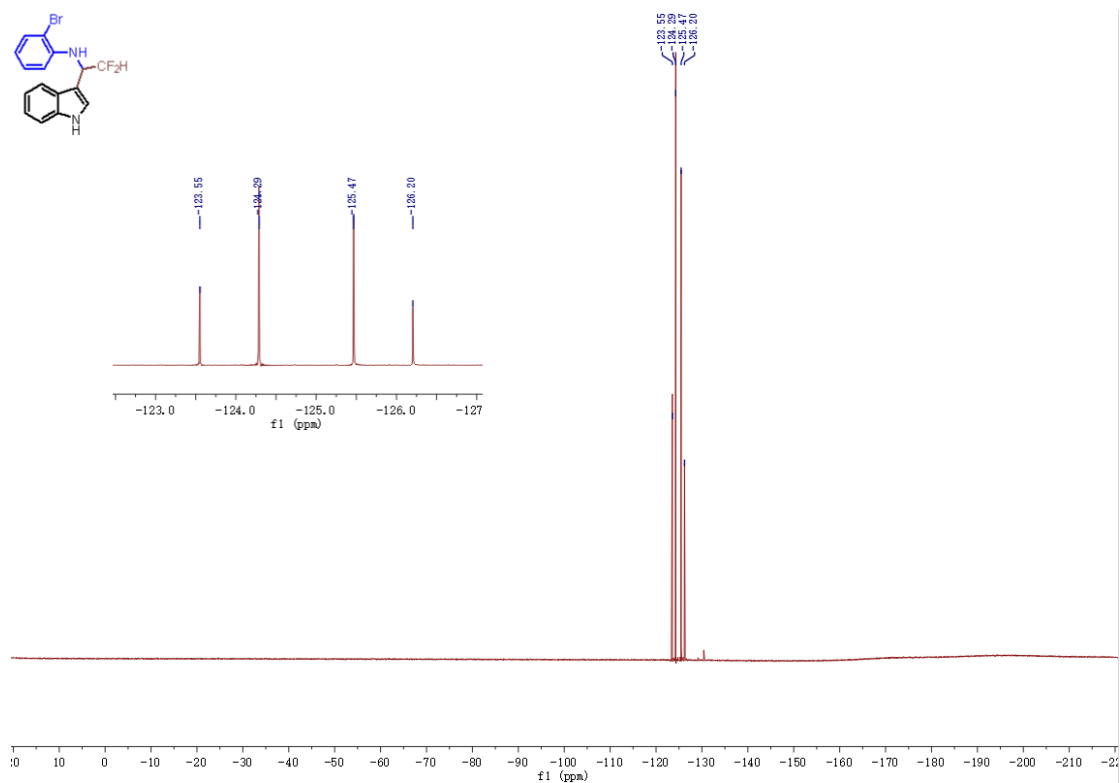

$^1\text{H}$  NMR (600 MHz,  $\text{CDCl}_3$ ) spectra of **7af**

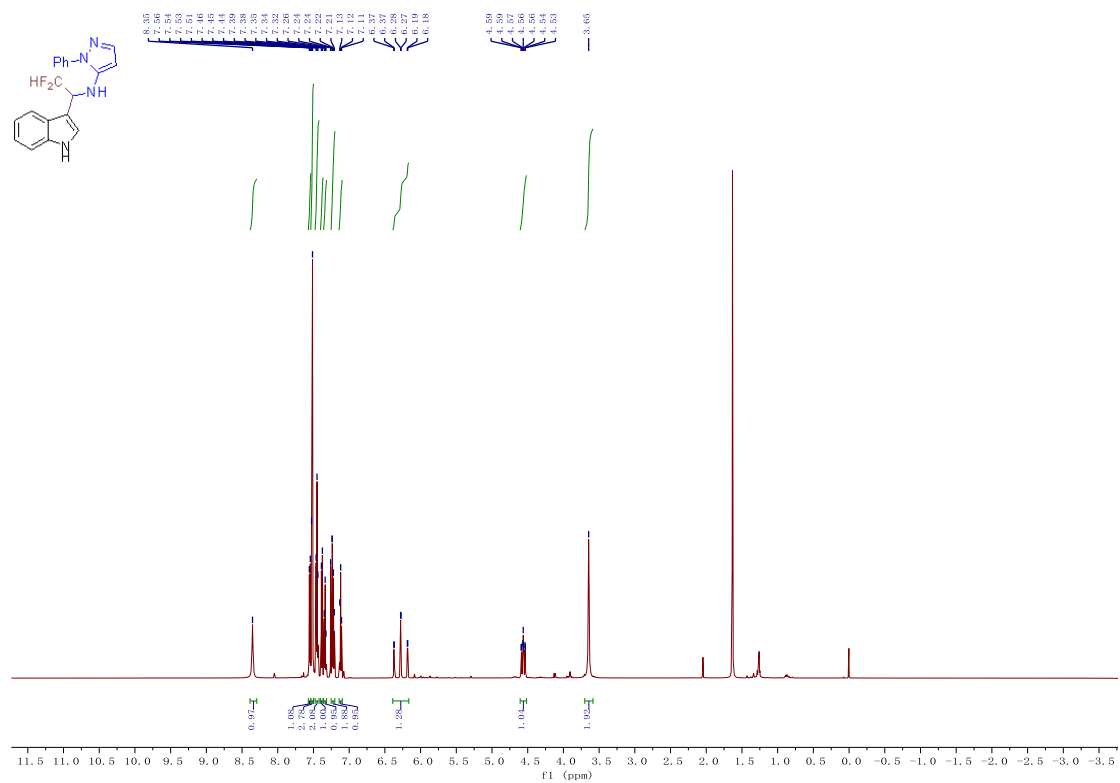

<sup>13</sup>C NMR (151 MHz, CDCl<sub>3</sub>) spectra of **7af**

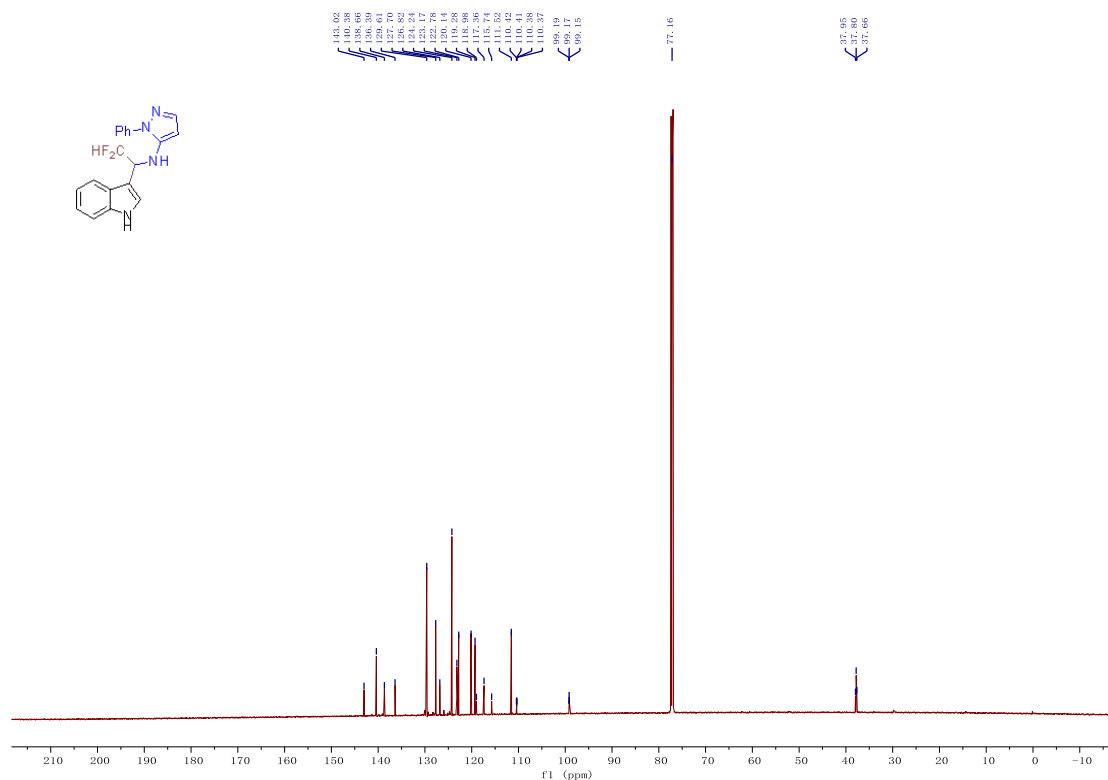

<sup>19</sup>F NMR (377 MHz, Chloroform-*d*) spectra of **7af**

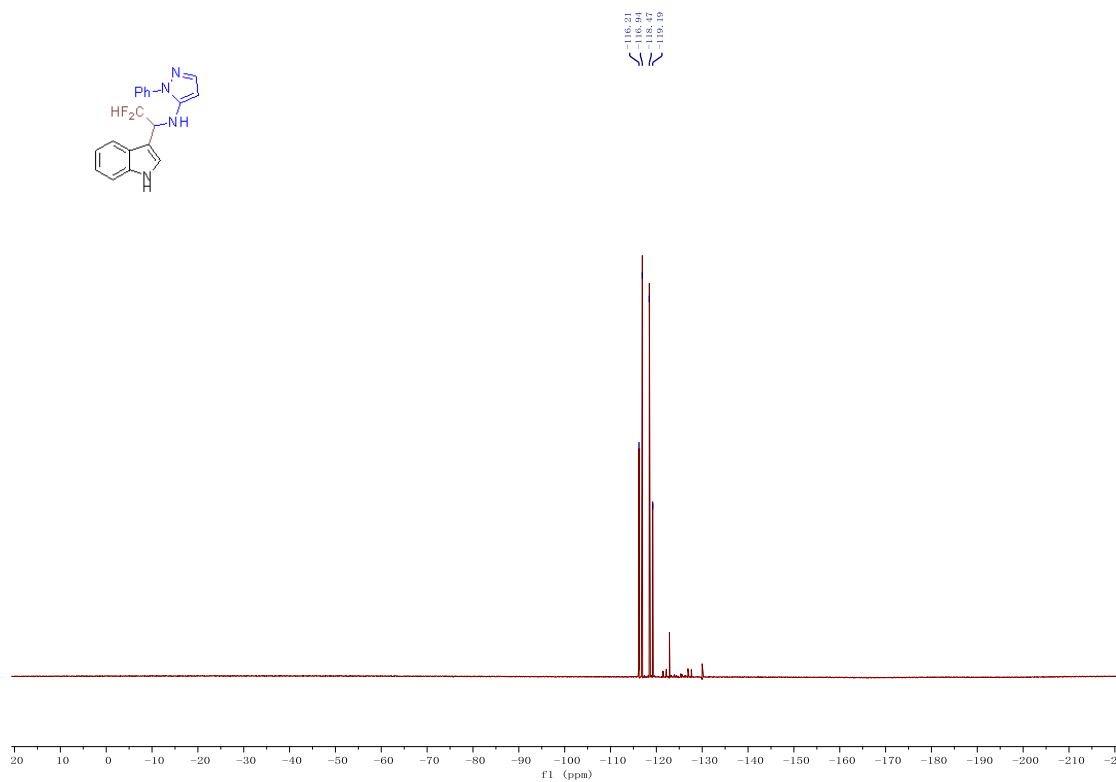

<sup>1</sup>H NMR (400 MHz, CDCl<sub>3</sub>) spectra of **7ag**

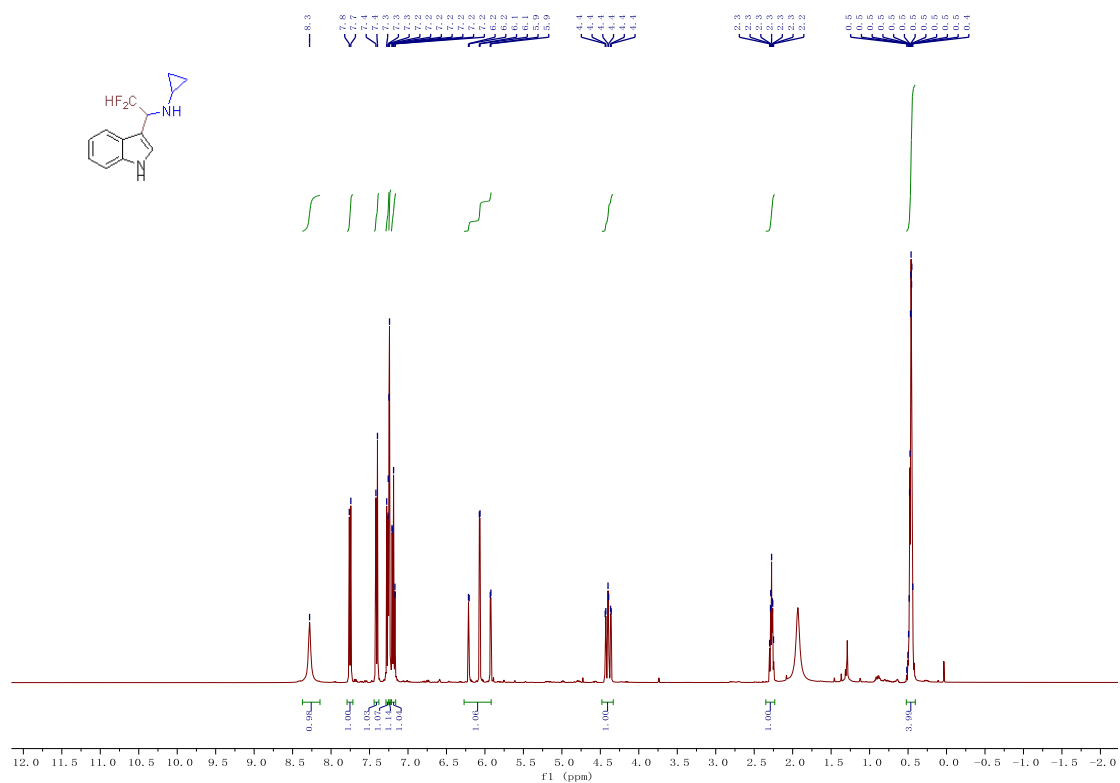

<sup>13</sup>C NMR (101 MHz, CDCl<sub>3</sub>) spectra of **7ag**

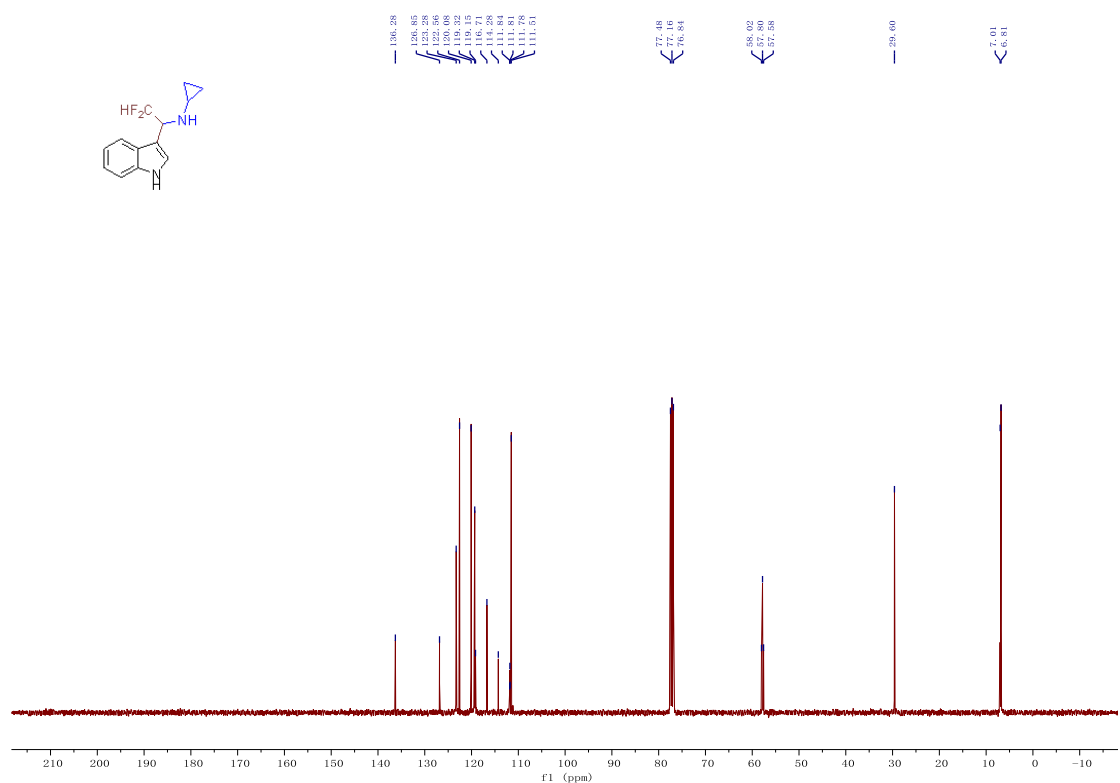

<sup>19</sup>F NMR (377 MHz, Chloroform-*d*) spectra of **7ag**

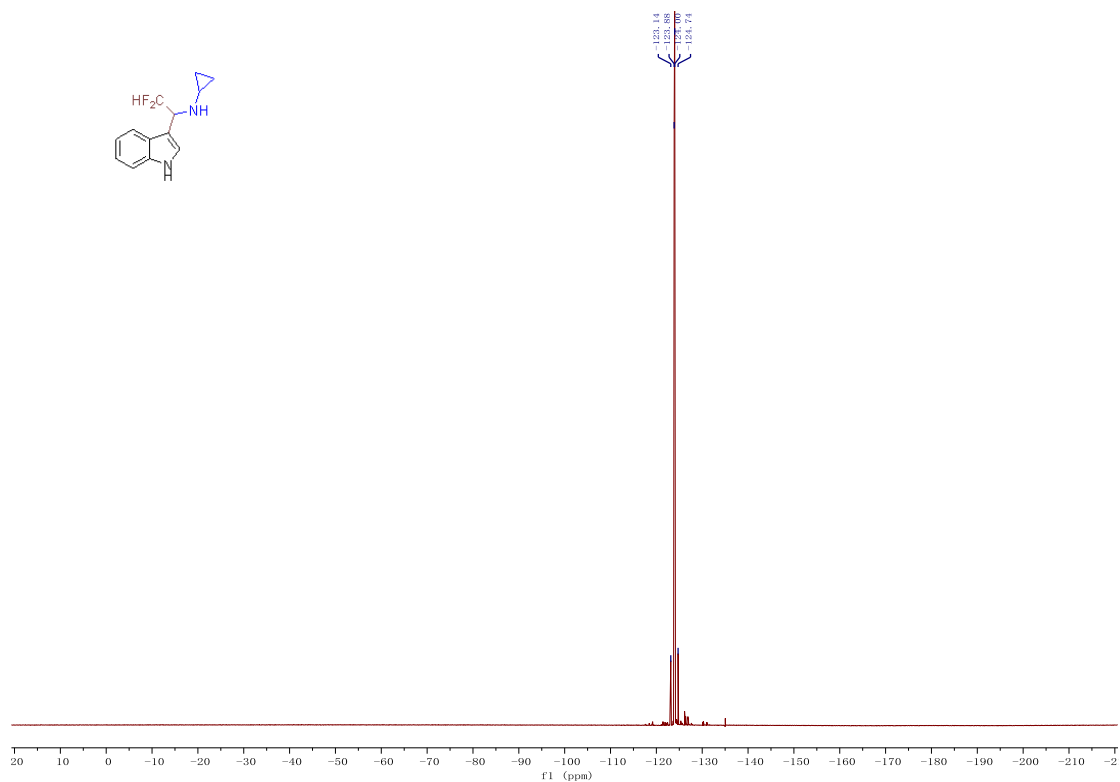

$^1\text{H}$  NMR (500 MHz, Chloroform-*d*) spectra of **9**

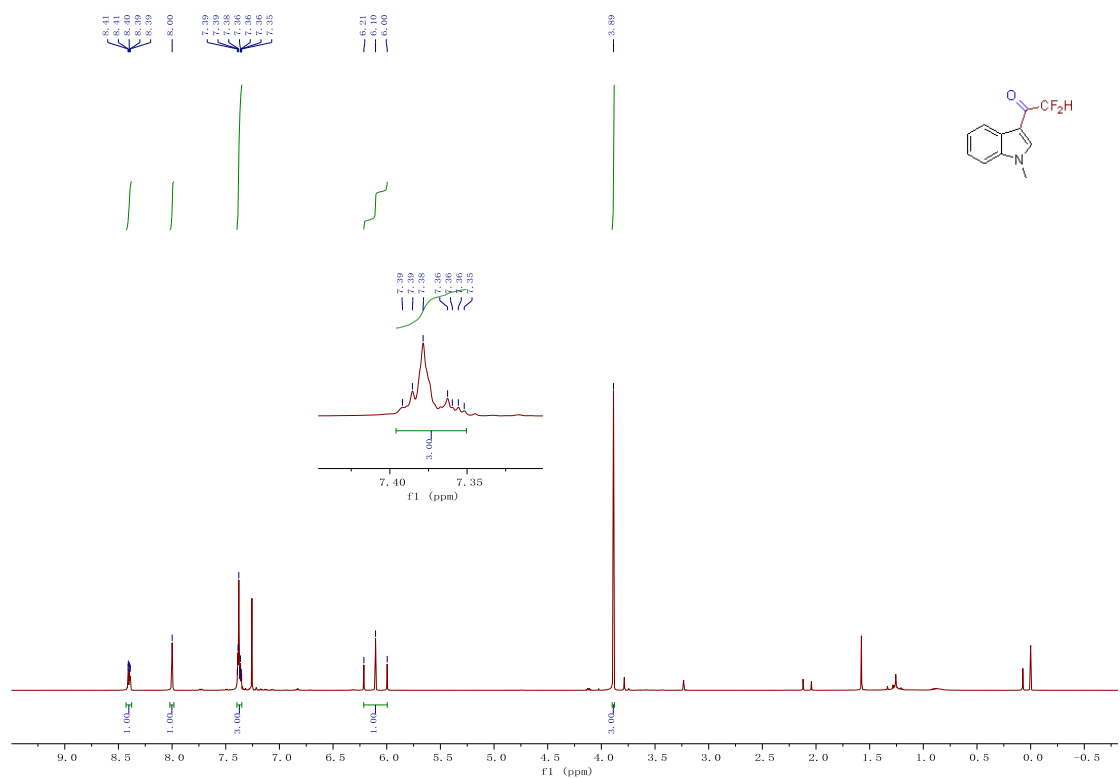

$^{13}\text{C}$  NMR (125 MHz, Chloroform-*d*) spectra of **9**

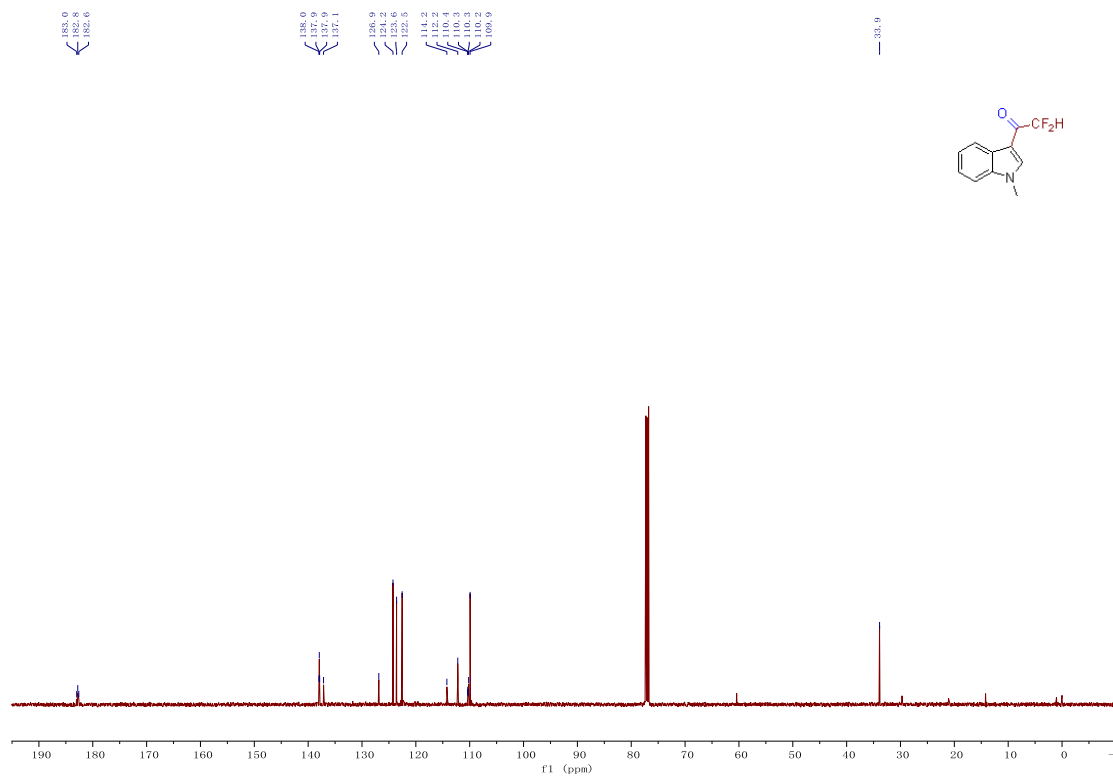

<sup>19</sup>F NMR (470 MHz, Chloroform-*d*) spectra of **9**

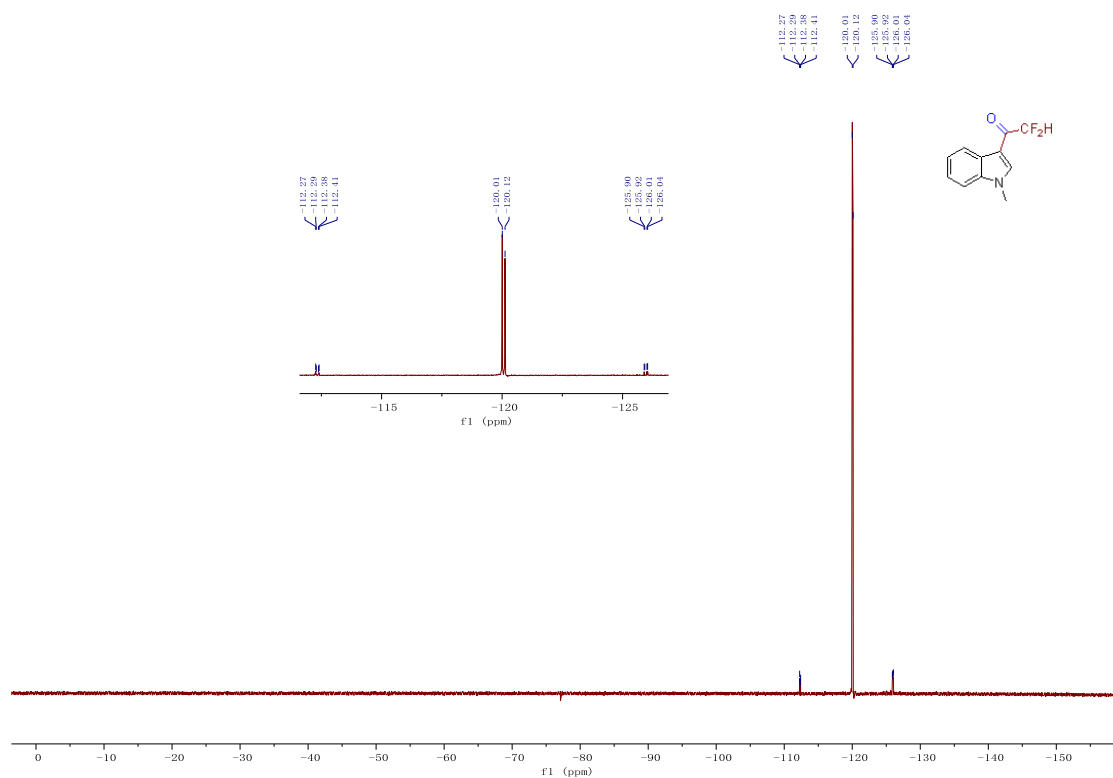

<sup>1</sup>H NMR (500 MHz, Chloroform-*d*) spectra of **10**

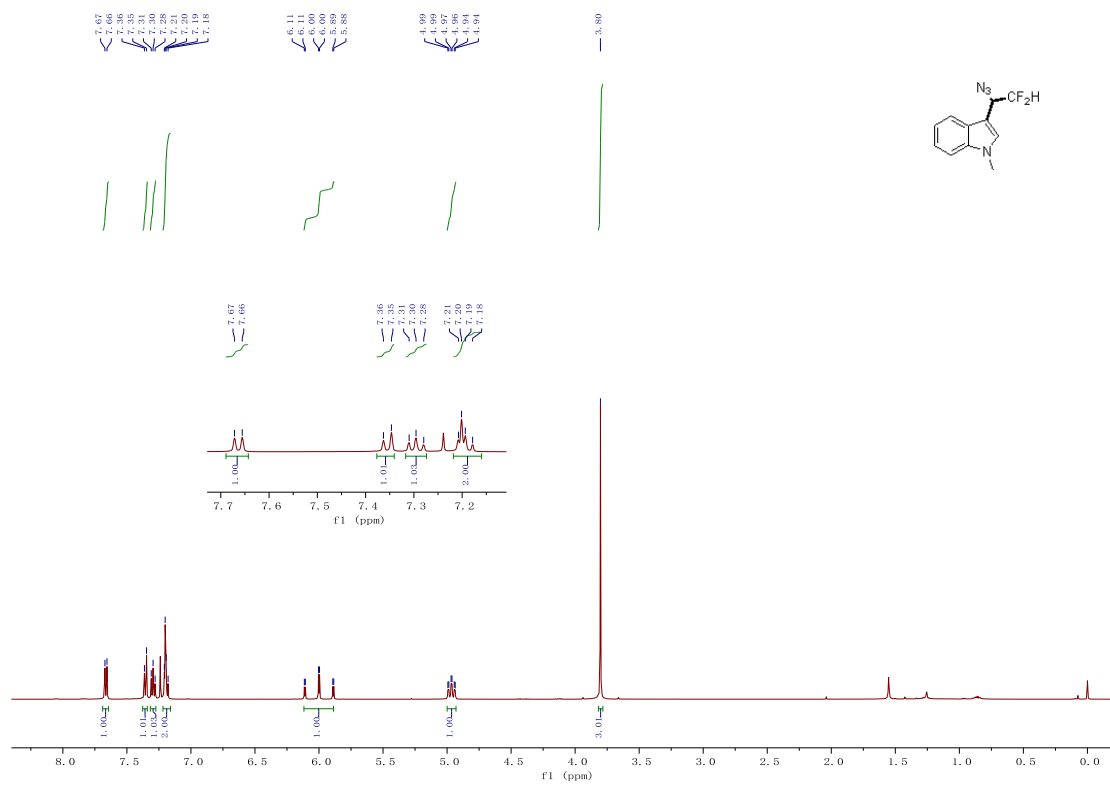

<sup>13</sup>C NMR (125 MHz, Chloroform-*d*) spectra of **10**

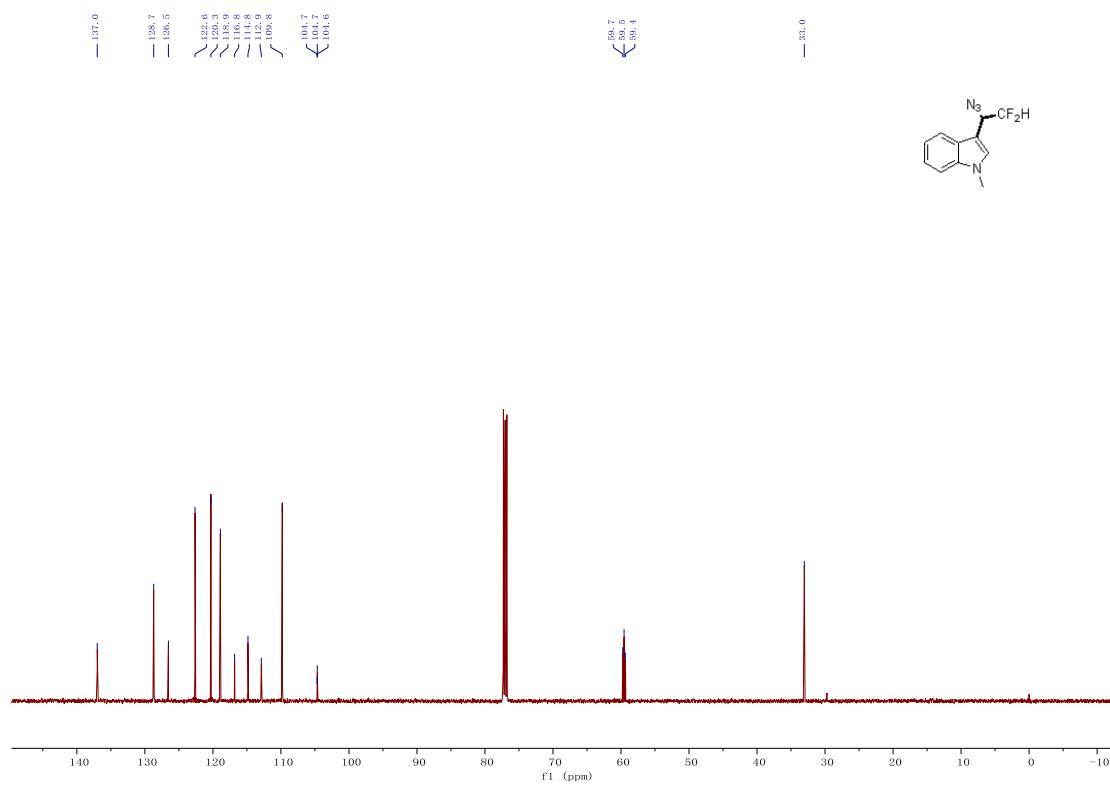

<sup>19</sup>F NMR (470 MHz, Chloroform-*d*) spectra of **10**





<sup>13</sup>C NMR (125 MHz, Chloroform-*d*) spectra of **11**

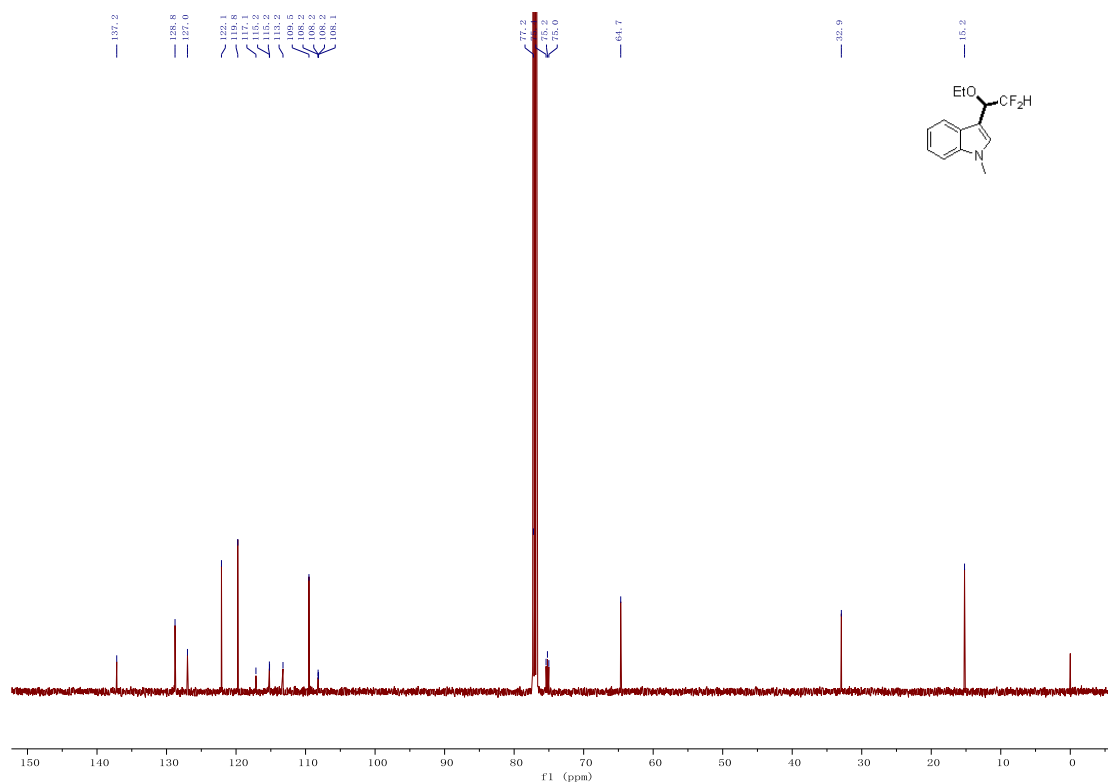

<sup>19</sup>F NMR (470 MHz, Chloroform-*d*) spectra of **11**

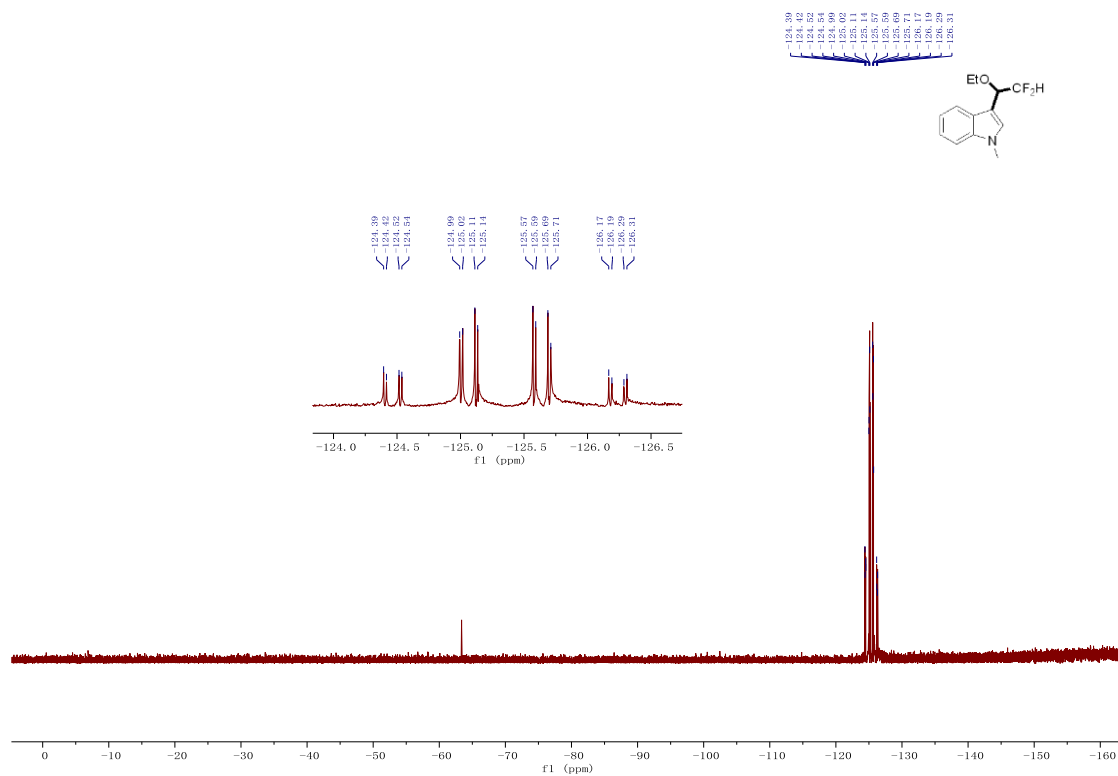

# <sup>1</sup>H NMR (500 MHz, Chloroform-*d*) spectra of 12

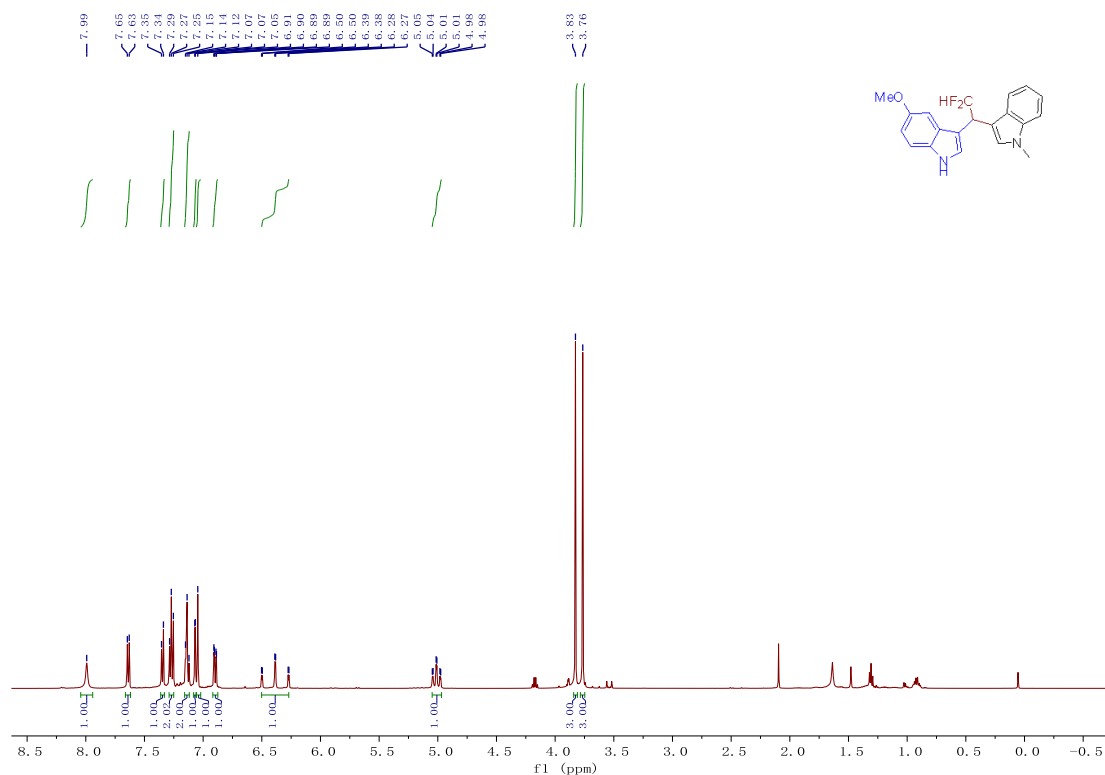

# <sup>13</sup>C NMR (125 MHz, Chloroform-*d*) spectra of 12

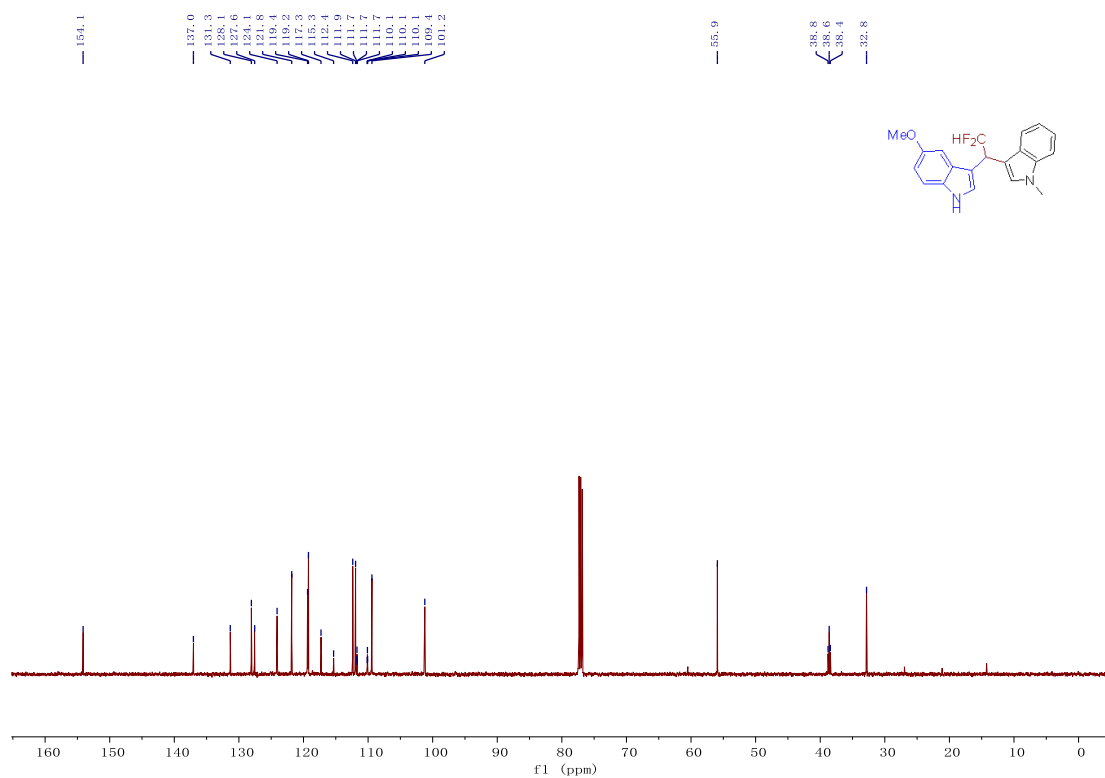

### $^{19}\text{F}$ NMR (470 MHz, Chloroform-*d*) spectra of **12**

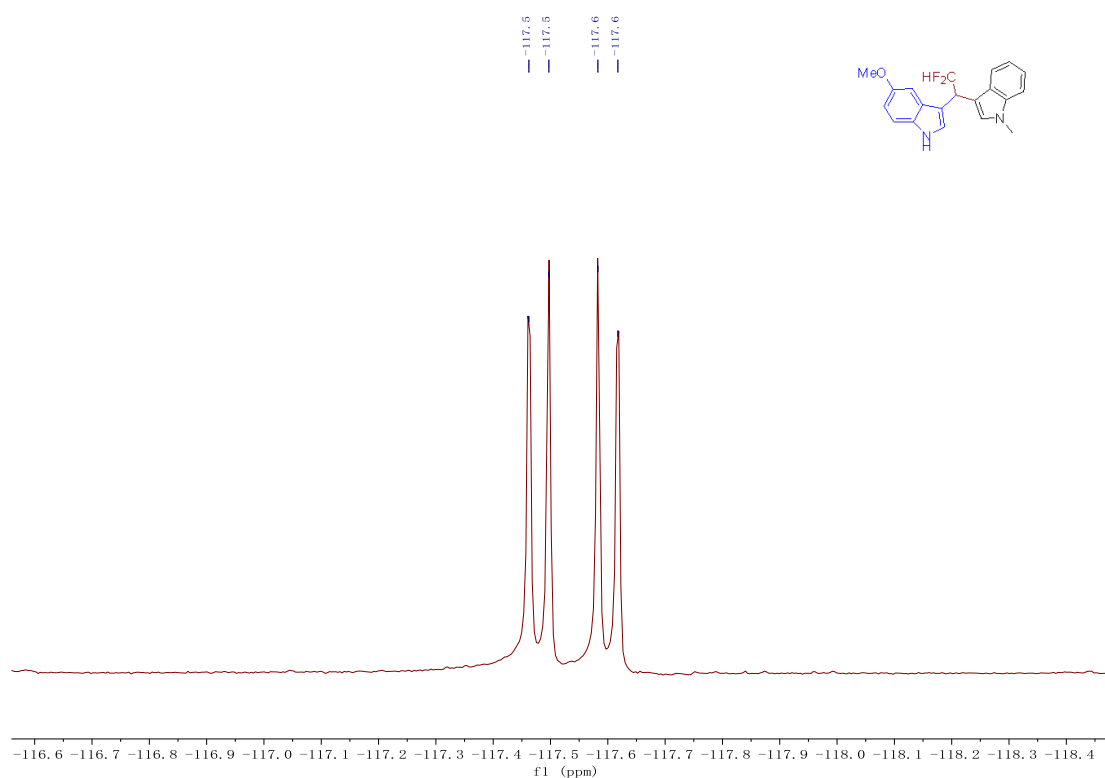

### $^1\text{H}$ NMR (500 MHz, Chloroform-*d*) spectra of **13**

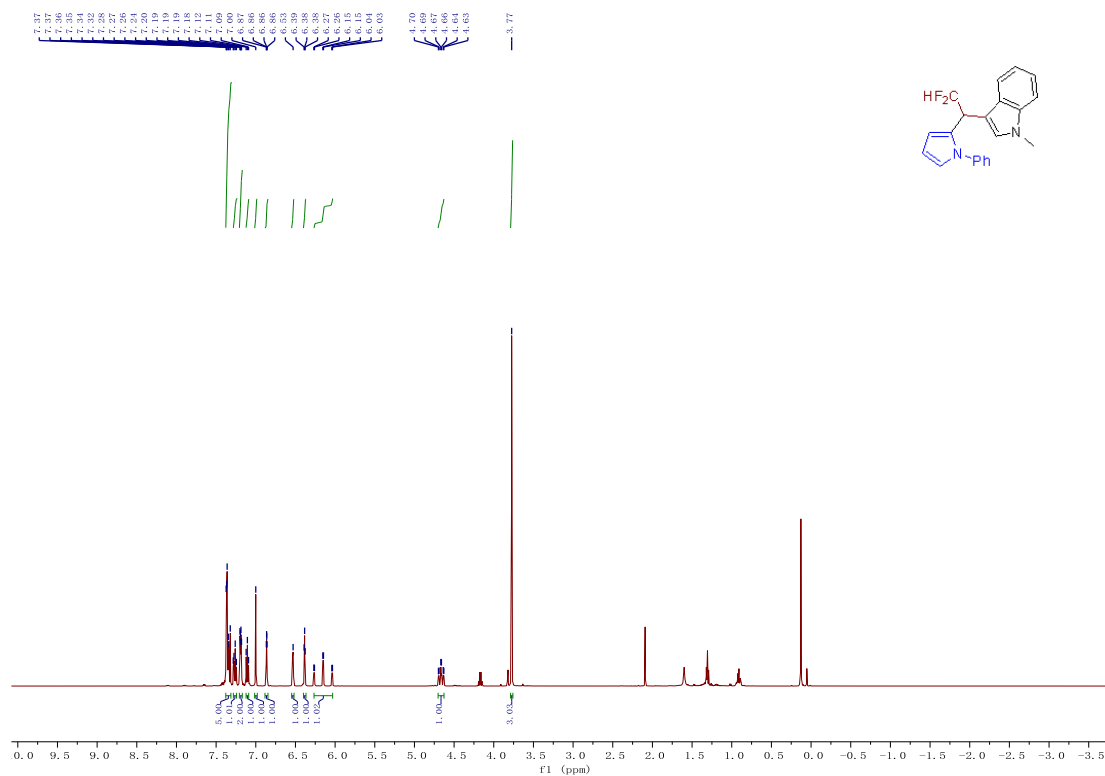

### $^{13}\text{C}$ NMR (125 MHz, Chloroform-*d*) spectra of **6**

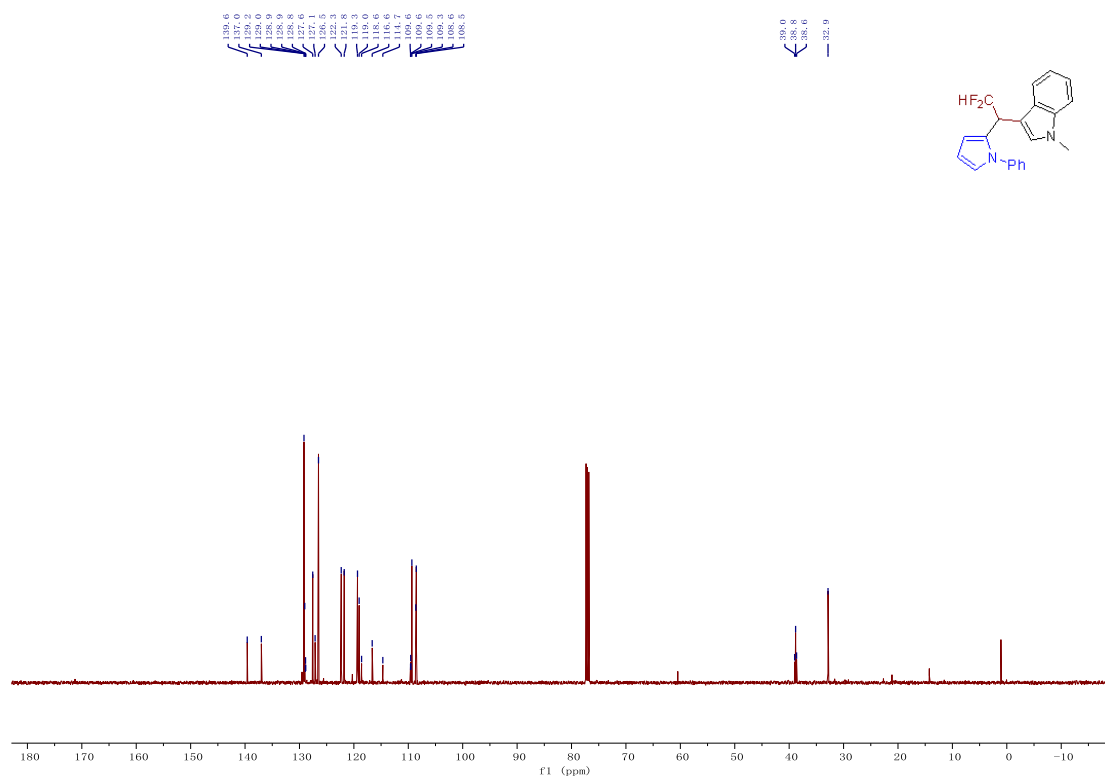

<sup>19</sup>F NMR (470 MHz, Chloroform-*d*) spectra of **13**

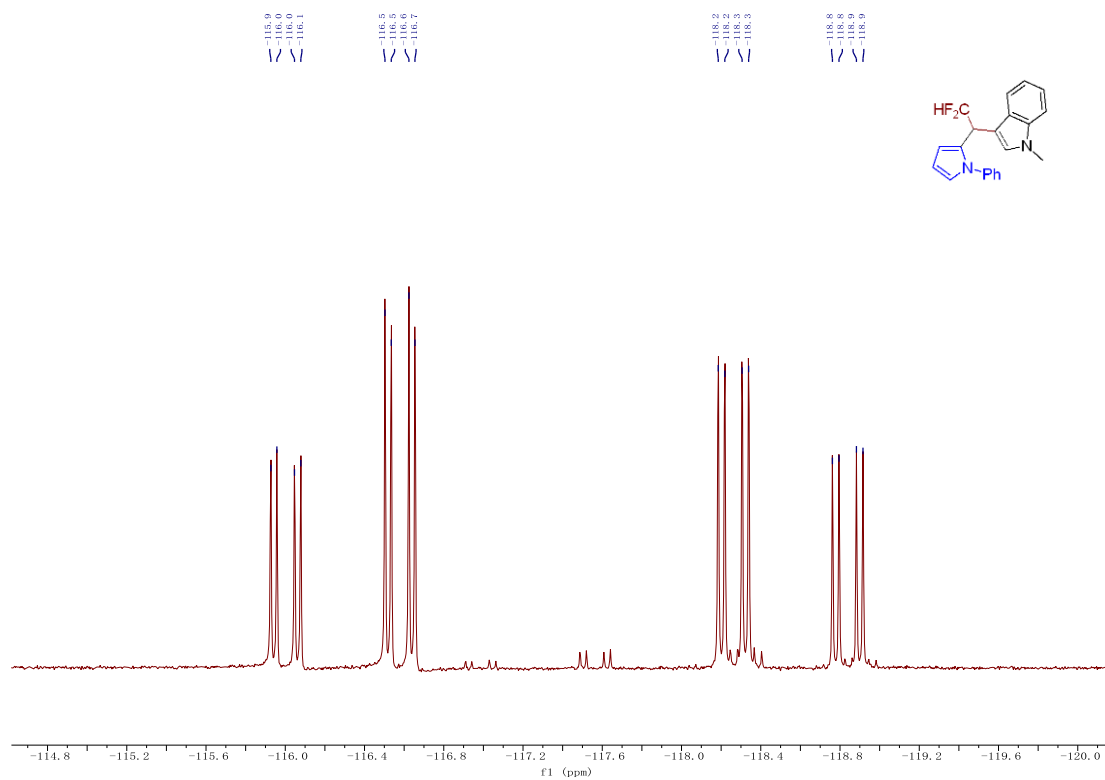

Supplement: d3ob01735d1.pdf [file d3ob01735d1.pdf]
